# Supplementary material for: Neuroprotective effects of ethanol extraction from Rubia yunnanensis Diels on chronic cerebral hypoperfusion: modulation of the System Xc-/GSH/GPX4 axis to alleviate oxidative stress and ferroptosis
Source: Front Pharmacol. 2025 Feb 25;16:1552228. doi: 10.3389/fphar.2025.1552228 (PMC11893507; doi:10.3389/fphar.2025.1552228)
Supplement: Supplementary file 1 [file Table2.XLSX]

## Sheet: Sheet1
geneID	gene_name	2VO7_count	2VO8_count	2VO9_count	2VO10_count	2VO11_count	2VO12_count	RY-A7_count	RY-A8_count	RY-A9_count	RY-A10_count	RY-A11_count	RY-A12_count	2VO7_fpkm	2VO8_fpkm	2VO9_fpkm	2VO10_fpkm	2VO11_fpkm	2VO12_fpkm	RY-A7_fpkm	RY-A8_fpkm	RY-A9_fpkm	RY-A10_fpkm	RY-A11_fpkm	RY-A12_fpkm	log2FoldChange	pvalue	padj	regulated	chr	start	end	strand	gene_biotype	gene_description	KO_annot	KEGG_pathway	GO_term	TF Family
ENSRNOG00000065367	ENSRNOG00000065367	0	0	0	0	0	0	14	5	23	10	51	22	0	0	0	0	0	0	1.5472	0.4373	2.005	0.7996	4.6181	1.7876	6.88774	4.56021e-11	4.06087e-07	up	15	25840838	25849032	+	protein_coding	--
ENSRNOG00000012051	Ncaph	148	149	176	92	157	81	35	48	65	64	63	46	2.3676	2.4691	2.4925	1.4384	2.4155	1.1323	0.6834	0.7417	1.001	0.9041	1.0078	0.6603	-1.24924	7.42269e-09	2.64396e-05	down	3	114371941	114399180	-	protein_coding	non-SMC condensin I complex%2C subunit H [Source:RGD Symbol%3BAcc:1596799]			GO:0000794: condensed nuclear chromosome; GO:0000796: condensin complex; GO:0003682: chromatin binding; GO:0003682: chromatin binding; GO:0005634: nucleus; GO:0005654: nucleoplasm; GO:0005694: chromosome; GO:0005737: cytoplasm; GO:0005829: cytosol; GO:0007076: mitotic chromosome condensation; GO:0007076: mitotic chromosome condensation; GO:0007143: female meiotic nuclear division; GO:0010032: mei…
ENSRNOG00000070959	ENSRNOG00000070959	19	14	21	21	20	28	4	8	2	1	1	2	0.8006	0.6111	0.7834	0.8648	0.8105	1.031	0.2057	0.3256	0.0811	0.0372	0.0421	0.0756	-2.67333	1.08528e-08	3.22147e-05	down	19	22474176	22476042	+	lncRNA	--
ENSRNOG00000005108	Wfs1	3479	2347	3304	2263	1253	2645	4839	5450	11794	7384	5014	5040	46.8264	32.7231	39.3684	29.7686	16.2198	31.1084	79.4934	70.8532	152.825	87.7669	67.4877	60.8749	1.45168	5.64916e-08	0.000125764	up	14	73810404	73835602	+	protein_coding	wolframin ER transmembrane glycoprotein [Source:RGD Symbol%3BAcc:68954]	K14020: WFS1; wolfamin	rno04141: Protein processing in endoplasmic reticulum - Rattus norvegicus (rat)	GO:0000122: negative regulation of transcription by RNA polymerase II; GO:0000122: negative regulation of transcription by RNA polymerase II; GO:0001822: kidney development; GO:0003091: renal water homeostasis; GO:0005516: calmodulin binding; GO:0005575: cellular_component; GO:0005783: endoplasmic reticulum; GO:0007601: visual perception; GO:0007605: sensory perception of sound; GO:0030141: secre…
ENSRNOG00000064836	ENSRNOG00000064836	128	154	162	134	13	4	4	11	4	3	1	9	0.7918	0.9869	0.8872	0.8102	0.0773	0.0216	0.0302	0.0657	0.0238	0.0164	0.0062	0.05	-4.14586	6.57213e-08	0.000130055	down	20	2606621	2618153	+	protein_coding	--
ENSRNOG00000065943	ENSRNOG00000065943	21	43	32	55	35	43	52	82	101	96	85	127	0.8954	1.8992	1.2079	2.2919	1.4352	1.6021	2.7061	3.377	4.1458	3.6147	3.6243	4.8593	1.29005	1.76119e-07	0.000313668	up	8	45557004	45558944	+	lncRNA	--
ENSRNOG00000031607	ENSRNOG00000031607	52	66	62	71	0	1	0	0	0	1	0	0	1.3251	1.7421	1.3986	1.7682	0	0.0223	0	0	0	0.0225	0	0	-7.2941	2.62796e-07	0.000390033	down	20	2623953	2692081	+	protein_coding	--			GO:0006955: immune response; GO:0030670: phagocytic vesicle membrane; GO:0071556: integral component of lumenal side of endoplasmic reticulum membrane
ENSRNOG00000065219	ENSRNOG00000065219	101	139	121	178	0	0	1	1	2	2	1	2	14.3974	20.525	15.2694	24.7983	0	0	0.174	0.1377	0.2745	0.2518	0.1426	0.2558	-5.87278	2.5496e-07	0.000390033	down	20	2704465	2705186	+	protein_coding	--
ENSRNOG00000053753	AABR07070307.1	114	77	112	58	110	69	176	472	443	253	152	141	0.7279	0.5093	0.633	0.3619	0.6754	0.3849	1.3715	2.9108	2.7229	1.4265	0.9705	0.8078	1.68837	3.32816e-07	0.000455958	up	8	60386875	61024995	-	protein_coding	thrombospondin type 1 domain containing 4 [Source:RGD Symbol%3BAcc:1566296]	K23377: THSD4, ADAMTSL6; thrombospondin type-1 domain-containing protein 4	rno04350: TGF-beta signaling pathway - Rattus norvegicus (rat)	GO:0001527: microfibril; GO:0031012: extracellular matrix; GO:0048251: elastic fiber assembly
ENSRNOG00000052061	Ppef2	103	72	86	97	171	76	46	35	33	41	32	34	1.4374	1.0408	1.0625	1.323	2.2951	0.9268	0.7835	0.4718	0.4434	0.5053	0.4466	0.4258	-1.349	4.4467e-07	0.000527971	down	14	15797435	15831491	+	protein_coding	protein phosphatase with EF-hand domain 2 [Source:RGD Symbol%3BAcc:1307093]	K13807: PPEF, PPP7C; serine/threonine-protein phosphatase with EF-hands [EC:3.1.3.16]		GO:0004722: protein serine/threonine phosphatase activity; GO:0005506: iron ion binding; GO:0005509: calcium ion binding; GO:0005634: nucleus; GO:0005829: cytosol; GO:0010801: negative regulation of peptidyl-threonine phosphorylation; GO:0017018: myosin phosphatase activity; GO:0030145: manganese ion binding; GO:0030544: Hsp70 protein binding; GO:0031435: mitogen-activated protein kinase kinase k…
ENSRNOG00000062986	Ccbe1	52	35	35	27	36	33	94	83	57	175	80	67	0.4378	0.3053	0.2609	0.2222	0.2915	0.2428	0.966	0.675	0.462	1.3012	0.6736	0.5062	1.44007	1.33723e-06	0.00125347	up	18	59580768	59824400	-	protein_coding	collagen and calcium binding EGF domains 1 [Source:RGD Symbol%3BAcc:1307670]	K19638: CCBE1; collagen and calcium-binding EGF domain-containing protein 1		GO:0001945: lymph vessel development; GO:0001946: lymphangiogenesis; GO:0002020: protease binding; GO:0003016: respiratory system process; GO:0005518: collagen binding; GO:0005615: extracellular space; GO:0007585: respiratory gaseous exchange by respiratory system; GO:0010575: positive regulation of vascular endothelial growth factor production; GO:0010595: positive regulation of endothelial cell…
ENSRNOG00000061215	Crym	662	813	427	1176	231	905	1195	3052	2897	4362	1646	1779	20.7649	26.416	11.8569	36.051	6.9686	24.8048	45.7487	92.4662	87.4815	120.826	51.6304	50.0748	1.8389	2.54487e-06	0.00206019	up	1	174560416	174575633	-	protein_coding	crystallin%2C mu [Source:RGD Symbol%3BAcc:620943]	K18258: CRYM; thiomorpholine-carboxylate dehydrogenase [EC:1.5.1.25]		GO:0000122: negative regulation of transcription by RNA polymerase II; GO:0003674: molecular_function; GO:0003714: transcription corepressor activity; GO:0005634: nucleus; GO:0005737: cytoplasm; GO:0005737: cytoplasm; GO:0005739: mitochondrion; GO:0005829: cytosol; GO:0005829: cytosol; GO:0006839: mitochondrial transport; GO:0007605: sensory perception of sound; GO:0009725: response to hormone; G…
ENSRNOG00000003407	Ptpn14	55	56	24	47	48	36	86	147	98	159	94	70	0.5591	0.5897	0.216	0.4669	0.4693	0.3198	1.067	1.4433	0.959	1.4273	0.9555	0.6385	1.35108	2.7335e-06	0.00211668	up	13	101268416	101414088	+	protein_coding	protein tyrosine phosphatase%2C non-receptor type 14 [Source:RGD Symbol%3BAcc:1307885]	K18025: PTPN14_21; tyrosine-protein phosphatase non-receptor type 14/21 [EC:3.1.3.48]		GO:0001946: lymphangiogenesis; GO:0001946: lymphangiogenesis; GO:0003712: transcription coregulator activity; GO:0004725: protein tyrosine phosphatase activity; GO:0004725: protein tyrosine phosphatase activity; GO:0005634: nucleus; GO:0005654: nucleoplasm; GO:0005654: nucleoplasm; GO:0005737: cytoplasm; GO:0005737: cytoplasm; GO:0005856: cytoskeleton; GO:0006355: regulation of DNA-templated tran…
ENSRNOG00000013793	C1qtnf9	24	17	35	26	78	17	2	2	6	5	14	3	0.654	0.4799	0.8443	0.6924	2.0442	0.4048	0.0665	0.0526	0.1574	0.1203	0.3815	0.0734	-2.55526	3.17293e-06	0.00230066	down	15	34911286	34922980	+	protein_coding	C1q and TNF related 9 [Source:RGD Symbol%3BAcc:1560876]	K24213: C1QTNF9; complement C1q and tumor necrosis factor-related protein 9		GO:0005179: hormone activity; GO:0005615: extracellular space; GO:0007165: signal transduction; GO:0007165: signal transduction; GO:0019395: fatty acid oxidation; GO:0019395: fatty acid oxidation; GO:0042802: identical protein binding; GO:0045792: negative regulation of cell size; GO:0071902: positive regulation of protein serine/threonine kinase activity; GO:0071902: positive regulation of prote…
ENSRNOG00000012609	Trdn	1	5	5	3	5	4	10	39	26	21	9	11	0.0096	0.0499	0.0426	0.0282	0.0463	0.0337	0.1175	0.3628	0.2411	0.1786	0.0867	0.0951	2.40656	4.00939e-06	0.00264472	up	1	23955651	24410595	-	protein_coding	triadin [Source:RGD Symbol%3BAcc:619856]	K23449: TRDN; triadin	rno04020: Calcium signaling pathway - Rattus norvegicus (rat); rno04260: Cardiac muscle contraction - Rattus norvegicus (rat)	GO:0005102: signaling receptor binding; GO:0005515: protein binding; GO:0005783: endoplasmic reticulum; GO:0005829: cytosol; GO:0005886: plasma membrane; GO:0005886: plasma membrane; GO:0005886: plasma membrane; GO:0006874: cellular calcium ion homeostasis; GO:0006874: cellular calcium ion homeostasis; GO:0009617: response to bacterium; GO:0009617: response to bacterium; GO:0010880: regulation of…
ENSRNOG00000026855	Abhd12b	66	2	8	3	76	2	0	0	0	0	2	0	2.1613	0.0678	0.2319	0.096	2.3935	0.0572	0	0	0	0	0.0655	0	-6.09491	1.16626e-05	0.00561278	down	6	88668642	88696458	+	protein_coding	abhydrolase domain containing 12B [Source:RGD Symbol%3BAcc:1303145]			GO:0004622: lysophospholipase activity; GO:0005789: endoplasmic reticulum membrane; GO:0006660: phosphatidylserine catabolic process; GO:0008474: palmitoyl-(protein) hydrolase activity; GO:0016020: membrane; GO:0047372: acylglycerol lipase activity; GO:0052651: monoacylglycerol catabolic process; GO:0098734: macromolecule depalmitoylation
ENSRNOG00000065254	RT1-CE16	360	280	502	246	51	26	34	32	46	39	72	39	2.4441	1.9691	3.0171	1.6322	0.333	0.1542	0.2817	0.2098	0.3007	0.2338	0.4888	0.2376	-2.38559	1.19756e-05	0.00561278	down	20	3257123	3279563	-	protein_coding	RT1 class I%2C locus CE16 [Source:RGD Symbol%3BAcc:1359403]	K06751: MHC1; MHC class I antigen	rno04144: Endocytosis - Rattus norvegicus (rat); rno04145: Phagosome - Rattus norvegicus (rat); rno04218: Cellular senescence - Rattus norvegicus (rat); rno04514: Cell adhesion molecules - Rattus norvegicus (rat); rno04612: Antigen processing and presentation - Rattus norvegicus (rat); rno04940: Type I diabetes mellitus - Rattus norvegicus (rat); rno05163: Human cytomegalovirus infection - Rattus…	GO:0006955: immune response; GO:0019882: antigen processing and presentation; GO:0030670: phagocytic vesicle membrane; GO:0071556: integral component of lumenal side of endoplasmic reticulum membrane
ENSRNOG00000014465	Oca2	34	53	54	33	55	36	4	6	26	9	24	11	0.5252	0.8481	0.7385	0.4982	0.8171	0.4859	0.0754	0.0895	0.3867	0.1228	0.3708	0.1525	-1.67903	1.31118e-05	0.00583802	down	1	107116278	107446074	+	protein_coding	OCA2 melanosomal transmembrane protein [Source:RGD Symbol%3BAcc:2318412]	K24200: OCA2; P protein		GO:0003674: molecular_function; GO:0005575: cellular_component; GO:0005765: lysosomal membrane; GO:0005789: endoplasmic reticulum membrane; GO:0007286: spermatid development; GO:0008150: biological_process; GO:0008283: cell population proliferation; GO:0010008: endosome membrane; GO:0016021: integral component of membrane; GO:0030318: melanocyte differentiation; GO:0030318: melanocyte differentia…
ENSRNOG00000014288	Fn1	1779	1983	1176	1128	1378	1097	2220	4161	2726	2511	2398	2423	9.2222	10.6484	5.3968	5.7148	6.8701	4.9691	14.0459	20.8344	13.6044	11.4949	12.4311	11.2715	1.00874	1.37166e-05	0.00595837	up	9	73196044	73264678	-	protein_coding	fibronectin 1 [Source:RGD Symbol%3BAcc:2624]	K05717: FN1; fibronectin 1	rno04151: PI3K-Akt signaling pathway - Rattus norvegicus (rat); rno04510: Focal adhesion - Rattus norvegicus (rat); rno04512: ECM-receptor interaction - Rattus norvegicus (rat); rno04810: Regulation of actin cytoskeleton - Rattus norvegicus (rat); rno04933: AGE-RAGE signaling pathway in diabetic complications - Rattus norvegicus (rat); rno05100: Bacterial invasion of epithelial cells - Rattus nor…	GO:0001503: ossification; GO:0001525: angiogenesis; GO:0001775: cell activation; GO:0001932: regulation of protein phosphorylation; GO:0001932: regulation of protein phosphorylation; GO:0002020: protease binding; GO:0002020: protease binding; GO:0002020: protease binding; GO:0002931: response to ischemia; GO:0005102: signaling receptor binding; GO:0005102: signaling receptor binding; GO:0005178: …
ENSRNOG00000014021	Matn4	152	177	220	210	104	414	40	59	103	67	118	88	2.6229	3.1639	3.3608	3.5416	1.726	6.2425	0.8425	0.9834	1.7111	1.021	2.0363	1.3627	-1.36731	1.72351e-05	0.00713855	down	3	153120632	153135865	-	protein_coding	matrilin 4 [Source:RGD Symbol%3BAcc:1309732]	K19467: MATN; matrilin		GO:0005509: calcium ion binding; GO:0048678: response to axon injury; GO:0062023: collagen-containing extracellular matrix; GO:0062023: collagen-containing extracellular matrix; GO:0120216: matrilin complex
ENSRNOG00000007250	Six4	75	76	52	70	102	82	25	25	28	21	46	52	0.5262	0.5524	0.323	0.48	0.6883	0.5027	0.2141	0.1694	0.1891	0.1301	0.3228	0.3274	-1.15279	1.99097e-05	0.00787981	down	6	91802329	91815992	-	protein_coding	SIX homeobox 4 [Source:RGD Symbol%3BAcc:1306726]	K15615: SIX4; homeobox protein SIX4	rno05202: Transcriptional misregulation in cancer - Rattus norvegicus (rat)	GO:0000978: RNA polymerase II cis-regulatory region sequence-specific DNA binding; GO:0000978: RNA polymerase II cis-regulatory region sequence-specific DNA binding; GO:0000981: DNA-binding transcription factor activity, RNA polymerase II-specific; GO:0001228: DNA-binding transcription activator activity, RNA polymerase II-specific; GO:0003677: DNA binding; GO:0003700: DNA-binding transcription f…	Homeobox
ENSRNOG00000022975	Nfam1	372	239	413	297	254	277	567	820	578	880	288	485	5.3133	3.5361	5.2221	4.1459	3.4891	3.4572	9.8843	11.3127	7.9478	11.0997	4.1136	6.2164	1.07204	2.08679e-05	0.0080795	up	7	114139345	114175442	-	protein_coding	NFAT activating protein with ITAM motif 1 [Source:RGD Symbol%3BAcc:1308316]			GO:0001819: positive regulation of cytokine production; GO:0004888: transmembrane signaling receptor activity; GO:0004888: transmembrane signaling receptor activity; GO:0007165: signal transduction; GO:0009986: cell surface; GO:0016021: integral component of membrane; GO:0016021: integral component of membrane; GO:0030183: B cell differentiation; GO:0035556: intracellular signal transduction; GO:…
ENSRNOG00000068642	Slc6a20	444	541	430	495	617	272	1367	2225	1047	1072	683	636	6.5879	8.3151	5.6481	7.1781	8.8046	3.5265	24.7555	31.8875	14.9557	14.0463	10.1342	8.4682	1.43378	2.76549e-05	0.0102611	up	8	123281472	123322573	-	protein_coding	solute carrier family 6 member 20 [Source:RGD Symbol%3BAcc:621651]	K05048: SLC6A15S; solute carrier family 6 (neurotransmitter transporter, amino acid/orphan) member 15/16/17/18/20		GO:0005298: proline:sodium symporter activity; GO:0005887: integral component of plasma membrane; GO:0005887: integral component of plasma membrane; GO:0006865: amino acid transport; GO:0006865: amino acid transport; GO:0015171: amino acid transmembrane transporter activity; GO:0015171: amino acid transmembrane transporter activity; GO:0015175: neutral amino acid transmembrane transporter activit…
ENSRNOG00000026661	Hcar1	5	11	6	13	8	14	46	83	54	59	3	33	0.2045	0.4661	0.2173	0.5197	0.3147	0.5004	2.2964	3.279	2.1263	2.1311	0.1227	1.2112	2.36634	3.43656e-05	0.012001	up	12	32711027	32712082	+	protein_coding	hydroxycarboxylic acid receptor 1 [Source:RGD Symbol%3BAcc:1586364]	K08401: HCAR1, GPR81; hydroxycarboxylic acid receptor 1	rno04024: cAMP signaling pathway - Rattus norvegicus (rat)	GO:0004930: G protein-coupled receptor activity; GO:0004930: G protein-coupled receptor activity; GO:0005886: plasma membrane; GO:0007186: G protein-coupled receptor signaling pathway; GO:0007186: G protein-coupled receptor signaling pathway; GO:0016020: membrane; GO:0016021: integral component of membrane; GO:0050995: negative regulation of lipid catabolic process
ENSRNOG00000001261	Ftcd	42	50	56	58	31	63	21	23	21	27	14	32	0.9634	1.188	1.1371	1.3002	0.6839	1.2627	0.5879	0.5096	0.4637	0.5469	0.3211	0.6587	-1.04036	3.91712e-05	0.013163	down	20	12055208	12068735	-	protein_coding	formimidoyltransferase cyclodeaminase [Source:RGD Symbol%3BAcc:70915]	K13990: FTCD; glutamate formiminotransferase / formiminotetrahydrofolate cyclodeaminase [EC:2.1.2.5 4.3.1.4]	rno00340: Histidine metabolism - Rattus norvegicus (rat); rno00670: One carbon pool by folate - Rattus norvegicus (rat); rno01100: Metabolic pathways - Rattus norvegicus (rat)	GO:0000139: Golgi membrane; GO:0000139: Golgi membrane; GO:0005542: folic acid binding; GO:0005783: endoplasmic reticulum; GO:0005793: endoplasmic reticulum-Golgi intermediate compartment; GO:0005794: Golgi apparatus; GO:0005794: Golgi apparatus; GO:0005814: centriole; GO:0005829: cytosol; GO:0005829: cytosol; GO:0005886: plasma membrane; GO:0005886: plasma membrane; GO:0007010: cytoskeleton orga…
ENSRNOG00000068029	Six2	7	15	4	9	4	0	53	196	108	70	3	9	0.0297	0.066	0.015	0.0374	0.0163	0	0.2748	0.8043	0.4417	0.2626	0.0127	0.0343	3.52317	4.33352e-05	0.0142926	up	6	8967157	8981193	+	protein_coding	SIX homeobox 2 [Source:RGD Symbol%3BAcc:1310792]	K19472: SIX2; homeobox protein SIX2		GO:0000978: RNA polymerase II cis-regulatory region sequence-specific DNA binding; GO:0000978: RNA polymerase II cis-regulatory region sequence-specific DNA binding; GO:0000981: DNA-binding transcription factor activity, RNA polymerase II-specific; GO:0001228: DNA-binding transcription activator activity, RNA polymerase II-specific; GO:0001656: metanephros development; GO:0001822: kidney developm…	Homeobox
ENSRNOG00000020557	Ryr1	334	166	432	309	126	241	806	839	1301	872	364	260	0.9351	0.4814	1.0707	0.8455	0.3393	0.5896	2.7542	2.2689	3.5067	2.156	1.0191	0.6532	1.59812	4.56503e-05	0.0145184	up	1	84292578	84423812	-	protein_coding	ryanodine receptor 1 [Source:RGD Symbol%3BAcc:1586637]	K04961: RYR1; ryanodine receptor 1	rno04020: Calcium signaling pathway - Rattus norvegicus (rat); rno04371: Apelin signaling pathway - Rattus norvegicus (rat); rno04713: Circadian entrainment - Rattus norvegicus (rat); rno04730: Long-term depression - Rattus norvegicus (rat); rno04921: Oxytocin signaling pathway - Rattus norvegicus (rat); rno05017: Spinocerebellar ataxia - Rattus norvegicus (rat); rno05020: Prion disease - Rattus …	GO:0001666: response to hypoxia; GO:0001666: response to hypoxia; GO:0002020: protease binding; GO:0003151: outflow tract morphogenesis; GO:0003151: outflow tract morphogenesis; GO:0005219: ryanodine-sensitive calcium-release channel activity; GO:0005219: ryanodine-sensitive calcium-release channel activity; GO:0005219: ryanodine-sensitive calcium-release channel activity; GO:0005219: ryanodine-s…
ENSRNOG00000029811	Kcne2	129	126	158	103	330	122	52	62	73	86	57	87	1.822	1.8435	1.9756	1.4218	4.4827	1.5057	0.8964	0.8458	0.9926	1.0727	0.8051	1.1027	-1.13664	5.08309e-05	0.0156086	down	11	31295614	31530043	+	protein_coding	potassium voltage-gated channel subfamily E regulatory subunit 2 [Source:RGD Symbol%3BAcc:621383]	K04896: KCNE2; potassium voltage-gated channel Isk-related subfamily E member 2	rno04971: Gastric acid secretion - Rattus norvegicus (rat)	GO:0005242: inward rectifier potassium channel activity; GO:0005242: inward rectifier potassium channel activity; GO:0005249: voltage-gated potassium channel activity; GO:0005251: delayed rectifier potassium channel activity; GO:0005251: delayed rectifier potassium channel activity; GO:0005251: delayed rectifier potassium channel activity; GO:0005261: cation channel activity; GO:0005515: protein …
ENSRNOG00000003620	Fmo3	5	8	11	11	12	8	18	81	44	46	12	12	0.1058	0.1754	0.2061	0.2275	0.2442	0.1479	0.4649	1.6557	0.8964	0.8597	0.254	0.2279	2.02449	6.86546e-05	0.0188114	up	13	75309374	75328028	-	protein_coding	flavin containing dimethylaniline monoxygenase 3 [Source:RGD Symbol%3BAcc:619761]	K00485: FMO; dimethylaniline monooxygenase (N-oxide forming) / hypotaurine monooxygenase [EC:1.14.13.8 1.8.1.-]	rno00430: Taurine and hypotaurine metabolism - Rattus norvegicus (rat); rno00982: Drug metabolism - cytochrome P450 - Rattus norvegicus (rat); rno01100: Metabolic pathways - Rattus norvegicus (rat)	GO:0004497: monooxygenase activity; GO:0004497: monooxygenase activity; GO:0004499: N,N-dimethylaniline monooxygenase activity; GO:0004499: N,N-dimethylaniline monooxygenase activity; GO:0005789: endoplasmic reticulum membrane; GO:0006805: xenobiotic metabolic process; GO:0016021: integral component of membrane; GO:0016597: amino acid binding; GO:0034899: trimethylamine monooxygenase activity; GO…
ENSRNOG00000011719	Ngb	466	196	405	80	290	157	71	86	85	89	149	92	11.0531	4.8157	8.504	1.8545	6.6154	3.254	2.0554	1.9702	1.9409	1.8642	3.5342	1.9582	-1.37311	7.86325e-05	0.0202963	down	6	106744378	106749830	-	protein_coding	neuroglobin [Source:RGD Symbol%3BAcc:621461]	K21893: NGB; neuroglobin		GO:0001666: response to hypoxia; GO:0001666: response to hypoxia; GO:0003674: molecular_function; GO:0005344: oxygen carrier activity; GO:0005344: oxygen carrier activity; GO:0005344: oxygen carrier activity; GO:0005737: cytoplasm; GO:0005739: mitochondrion; GO:0007568: aging; GO:0007601: visual perception; GO:0010039: response to iron ion; GO:0015671: oxygen transport; GO:0015671: oxygen transpo…
ENSRNOG00000046468	Ptgfr	9	21	10	6	19	7	41	103	56	57	24	10	0.1295	0.3131	0.1274	0.0844	0.263	0.088	0.7202	1.4319	0.7759	0.7245	0.3454	0.1292	2.08815	8.89316e-05	0.0219982	up	2	240733375	240765650	-	protein_coding	prostaglandin F receptor [Source:RGD Symbol%3BAcc:3436]	K04262: PTGFR; prostaglandin F receptor	rno04020: Calcium signaling pathway - Rattus norvegicus (rat); rno04072: Phospholipase D signaling pathway - Rattus norvegicus (rat); rno04080: Neuroactive ligand-receptor interaction - Rattus norvegicus (rat)	GO:0004958: prostaglandin F receptor activity; GO:0004958: prostaglandin F receptor activity; GO:0005576: extracellular region; GO:0005737: cytoplasm; GO:0005886: plasma membrane; GO:0005886: plasma membrane; GO:0006954: inflammatory response; GO:0007189: adenylate cyclase-activating G protein-coupled receptor signaling pathway; GO:0007204: positive regulation of cytosolic calcium ion concentrati…
ENSRNOG00000004535	Kcng3	6	11	18	11	7	15	24	22	25	55	28	17	0.147	0.2792	0.3904	0.2634	0.1649	0.3211	0.7176	0.5206	0.5896	1.1899	0.686	0.3737	1.41998	9.52278e-05	0.0226134	up	6	11051134	11099264	+	protein_coding	potassium voltage-gated channel modifier subfamily G member 3 [Source:RGD Symbol%3BAcc:628832]	K04902: KCNG3, KV6.3; potassium voltage-gated channel subfamily G member 3		GO:0005249: voltage-gated potassium channel activity; GO:0005249: voltage-gated potassium channel activity; GO:0005251: delayed rectifier potassium channel activity; GO:0005251: delayed rectifier potassium channel activity; GO:0005251: delayed rectifier potassium channel activity; GO:0005251: delayed rectifier potassium channel activity; GO:0005783: endoplasmic reticulum; GO:0005783: endoplasmic …
ENSRNOG00000011923	Mgarp	71	15	26	14	113	13	2	6	5	12	7	13	2.5282	0.5533	0.8196	0.4872	3.8698	0.4045	0.0869	0.2064	0.1714	0.3773	0.2493	0.4154	-2.43922	9.3127e-05	0.0226134	down	2	135431283	135439612	-	protein_coding	mitochondria-localized glutamic acid-rich protein [Source:RGD Symbol%3BAcc:1586369]			GO:0005739: mitochondrion; GO:0005743: mitochondrial inner membrane; GO:0006626: protein targeting to mitochondrion; GO:0008089: anterograde axonal transport; GO:0008090: retrograde axonal transport; GO:0010821: regulation of mitochondrion organization; GO:0010822: positive regulation of mitochondrion organization; GO:0019896: axonal transport of mitochondrion; GO:0021987: cerebral cortex develop…
ENSRNOG00000010253	Cd163	38	28	19	17	19	6	50	120	109	47	67	24	0.3433	0.262	0.152	0.1501	0.1651	0.0474	0.5513	1.0471	0.948	0.375	0.6053	0.1946	1.78245	9.78465e-05	0.0227326	up	4	157085093	157117878	+	protein_coding	CD163 molecule [Source:RGD Symbol%3BAcc:1310382]	K06545: CD163; CD163 antigen		GO:0005044: scavenger receptor activity; GO:0005886: plasma membrane; GO:0006897: endocytosis; GO:0009897: external side of plasma membrane; GO:0009897: external side of plasma membrane; GO:0009986: cell surface; GO:0010259: multicellular organism aging; GO:0097110: scaffold protein binding
ENSRNOG00000027157	Ly6g6e	34	18	43	9	22	42	3	18	2	4	3	2	0.9655	0.5295	1.081	0.2498	0.6008	1.0422	0.104	0.4937	0.0547	0.1003	0.0852	0.051	-2.27187	0.000102983	0.0235145	down	20	3744999	3750849	-	protein_coding	lymphocyte antigen 6 family member G6E [Source:RGD Symbol%3BAcc:1303112]	K06846: LY6D_E_F_G6_H; lymphocyte antigen 6 complex locus protein D/E/F/G6/H		GO:0002029: desensitization of G protein-coupled receptor signaling pathway; GO:0002029: desensitization of G protein-coupled receptor signaling pathway; GO:0005886: plasma membrane; GO:0005886: plasma membrane; GO:0030549: acetylcholine receptor activator activity; GO:0030549: acetylcholine receptor activator activity; GO:0033130: acetylcholine receptor binding; GO:0033130: acetylcholine recepto…
ENSRNOG00000030522	ENSRNOG00000030522	18	14	31	7	22	13	1	2	8	8	1	5	0.5422	0.4368	0.8266	0.2061	0.6373	0.3421	0.0368	0.0582	0.232	0.2128	0.0301	0.1351	-1.98784	0.000112737	0.0254159	down	4	162009857	162024625	+	protein_coding	similar to osteoclast inhibitory lectin [Source:RGD Symbol%3BAcc:1564464]			GO:0009897: external side of plasma membrane; GO:0016021: integral component of membrane; GO:0030246: carbohydrate binding; GO:0046703: natural killer cell lectin-like receptor binding
ENSRNOG00000019445	Msln	11	22	15	11	16	2	41	283	39	88	16	16	0.2204	0.4565	0.266	0.2154	0.3083	0.035	1.0025	5.4761	0.7522	1.5568	0.3205	0.2876	2.7089	0.000120635	0.0262012	up	10	14771961	14777643	-	protein_coding	mesothelin [Source:RGD Symbol%3BAcc:69333]	K20733: MSLN; mesothelin		GO:0003674: molecular_function; GO:0005615: extracellular space; GO:0005794: Golgi apparatus; GO:0005886: plasma membrane; GO:0007160: cell-matrix adhesion; GO:0009986: cell surface; GO:0009986: cell surface; GO:0031016: pancreas development; GO:0031225: anchored component of membrane
ENSRNOG00000015567	Slc9a2	90	116	205	94	47	39	259	485	522	357	139	95	0.9632	1.2859	1.9421	0.9832	0.4837	0.3647	3.3829	5.0133	5.378	3.3738	1.4876	0.9123	1.76665	0.000127813	0.0274259	up	9	42931346	43014444	+	protein_coding	solute carrier family 9 member A2 [Source:RGD Symbol%3BAcc:3719]	K14722: SLC9A2, NHE2; solute carrier family 9 (sodium/hydrogen exchanger), member 2		GO:0005886: plasma membrane; GO:0006814: sodium ion transport; GO:0006885: regulation of pH; GO:0008104: protein localization; GO:0015385: sodium:proton antiporter activity; GO:0015385: sodium:proton antiporter activity; GO:0015385: sodium:proton antiporter activity; GO:0015386: potassium:proton antiporter activity; GO:0016021: integral component of membrane; GO:0016324: apical plasma membrane; G…
ENSRNOG00000059890	Clec2d2	1	1	1	1	1	0	6	14	12	6	4	2	0.0139	0.0144	0.0123	0.0136	0.0134	0	0.1018	0.188	0.1607	0.0737	0.0556	0.025	3.22808	0.000140685	0.029135	up	4	162059008	162071088	-	protein_coding	C-type lectin domain family 2 member D2 [Source:RGD Symbol%3BAcc:1562831]			GO:0009897: external side of plasma membrane; GO:0016021: integral component of membrane; GO:0030246: carbohydrate binding; GO:0046703: natural killer cell lectin-like receptor binding
ENSRNOG00000004210	Osr1	15	49	26	51	44	17	107	267	158	178	31	41	0.2244	0.7594	0.3444	0.7457	0.6331	0.2222	1.9538	3.8583	2.2757	2.3517	0.4638	0.5504	2.00793	0.000146431	0.0296357	up	6	32373816	32380817	+	protein_coding	odd-skipped related transcription factor 1 [Source:RGD Symbol%3BAcc:1311807]	K09215: OSR, ODD; odd-skipped		GO:0000122: negative regulation of transcription by RNA polymerase II; GO:0000977: RNA polymerase II transcription regulatory region sequence-specific DNA binding; GO:0000981: DNA-binding transcription factor activity, RNA polymerase II-specific; GO:0001655: urogenital system development; GO:0001655: urogenital system development; GO:0001655: urogenital system development; GO:0001656: metanephros…	zf-C2H2
ENSRNOG00000030568	Rgs12	669	748	1115	909	525	1247	1098	1492	1847	4021	869	2400	4.4592	5.1646	6.5793	5.9215	3.3655	7.2629	8.9325	9.6056	11.852	23.6683	5.7923	14.3553	1.22805	0.000144835	0.0296357	up	14	75715934	75794596	-	protein_coding	regulator of G-protein signaling 12 [Source:RGD Symbol%3BAcc:3564]	K16449: RGS; regulator of G-protein signaling		GO:0001965: G-protein alpha-subunit binding; GO:0005096: GTPase activator activity; GO:0005096: GTPase activator activity; GO:0005096: GTPase activator activity; GO:0005515: protein binding; GO:0005634: nucleus; GO:0005634: nucleus; GO:0005654: nucleoplasm; GO:0005654: nucleoplasm; GO:0005730: nucleolus; GO:0005730: nucleolus; GO:0005737: cytoplasm; GO:0005737: cytoplasm; GO:0005737: cytoplasm; G…
ENSRNOG00000062844	ENSRNOG00000062844	210	232	57	44	142	318	37	71	44	49	53	53	1.2186	1.3946	0.2928	0.2495	0.7925	1.6125	0.2621	0.398	0.2458	0.2511	0.3076	0.276	-1.65548	0.000153735	0.0304816	down	X	111828102	111848636	-	lncRNA	--
ENSRNOG00000008947	Cpz	23	20	38	42	48	15	112	238	162	99	43	19	0.4032	0.3632	0.5897	0.7195	0.8092	0.2298	2.3962	4.0297	2.7339	1.5325	0.7538	0.2989	1.97147	0.000164579	0.0318604	up	14	75223605	75246945	+	protein_coding	carboxypeptidase Z [Source:RGD Symbol%3BAcc:620496]	K13022: CPZ; carboxypeptidase Z [EC:3.4.17.-]		GO:0004181: metallocarboxypeptidase activity; GO:0004181: metallocarboxypeptidase activity; GO:0005615: extracellular space; GO:0006508: proteolysis; GO:0006518: peptide metabolic process; GO:0008270: zinc ion binding; GO:0016055: Wnt signaling pathway; GO:0016485: protein processing
ENSRNOG00000016437	Tm4sf4	43	18	52	22	45	12	10	13	12	12	11	10	1.1422	0.4953	1.2228	0.5711	1.1496	0.2785	0.3242	0.3335	0.3069	0.2815	0.2922	0.2384	-1.38641	0.000180219	0.0329704	down	2	141481902	141621200	+	protein_coding	transmembrane 4 L six family member 4 [Source:RGD Symbol%3BAcc:621784]	K24919: TM4SF4; transmembrane 4 L6 family member 4		GO:0016021: integral component of membrane; GO:0042246: tissue regeneration
ENSRNOG00000004516	Itgbl1	91	71	52	122	67	114	129	345	241	308	96	124	1.7179	1.3884	0.869	2.2509	1.2164	1.8805	2.9722	6.2906	4.3799	5.1346	1.8123	2.1006	1.31566	0.000191284	0.0336229	up	15	100780184	101041733	+	protein_coding	integrin subunit beta like 1 [Source:RGD Symbol%3BAcc:1560635]			GO:0005178: integrin binding; GO:0005576: extracellular region; GO:0005925: focal adhesion; GO:0007160: cell-matrix adhesion; GO:0007229: integrin-mediated signaling pathway; GO:0008305: integrin complex; GO:0009986: cell surface; GO:0016477: cell migration; GO:0033627: cell adhesion mediated by integrin
ENSRNOG00000011823	Tfap2b	16	24	10	21	8	22	59	136	67	60	21	17	0.1858	0.2887	0.1028	0.2383	0.0893	0.2232	0.8361	1.5252	0.7489	0.6152	0.2438	0.1771	1.91112	0.000211093	0.0351361	up	9	21786258	21814520	+	protein_coding	transcription factor AP-2 beta [Source:RGD Symbol%3BAcc:1306321]	K09176: TFAP2A_B; transcription factor AP-2 alpha/beta		GO:0000122: negative regulation of transcription by RNA polymerase II; GO:0000122: negative regulation of transcription by RNA polymerase II; GO:0000977: RNA polymerase II transcription regulatory region sequence-specific DNA binding; GO:0000978: RNA polymerase II cis-regulatory region sequence-specific DNA binding; GO:0000981: DNA-binding transcription factor activity, RNA polymerase II-specific…	AP-2
ENSRNOG00000010917	Bmp5	10	6	7	7	18	6	55	80	35	30	7	12	0.1165	0.0724	0.0722	0.0797	0.2016	0.0611	0.7819	0.9001	0.3925	0.3086	0.0815	0.1254	2.1701	0.000227664	0.0371991	up	8	76517164	76639925	+	protein_coding	bone morphogenetic protein 5 [Source:RGD Symbol%3BAcc:1305979]	K04663: BMP5; bone morphogenetic protein 5	rno04060: Cytokine-cytokine receptor interaction - Rattus norvegicus (rat); rno04350: TGF-beta signaling pathway - Rattus norvegicus (rat); rno04390: Hippo signaling pathway - Rattus norvegicus (rat)	GO:0001501: skeletal system development; GO:0003272: endocardial cushion formation; GO:0003323: type B pancreatic cell development; GO:0003344: pericardium morphogenesis; GO:0005125: cytokine activity; GO:0005615: extracellular space; GO:0005615: extracellular space; GO:0007389: pattern specification process; GO:0008083: growth factor activity; GO:0008284: positive regulation of cell population p…
ENSRNOG00000013829	Chrna3	125	32	475	38	326	50	16	37	43	48	35	41	2.7295	0.7238	9.1822	0.811	6.8463	0.954	0.4264	0.7804	0.9039	0.9256	0.7643	0.8034	-2.10582	0.000243603	0.0390861	down	8	55401702	55415165	-	protein_coding	cholinergic receptor nicotinic alpha 3 subunit [Source:RGD Symbol%3BAcc:2345]	K04805: CHRNA3; nicotinic acetylcholine receptor alpha-3	rno04080: Neuroactive ligand-receptor interaction - Rattus norvegicus (rat); rno04725: Cholinergic synapse - Rattus norvegicus (rat); rno05207: Chemical carcinogenesis - receptor activation - Rattus norvegicus (rat)	GO:0005231: excitatory extracellular ligand-gated ion channel activity; GO:0005886: plasma membrane; GO:0005887: integral component of plasma membrane; GO:0005892: acetylcholine-gated channel complex; GO:0005892: acetylcholine-gated channel complex; GO:0005892: acetylcholine-gated channel complex; GO:0005892: acetylcholine-gated channel complex; GO:0005892: acetylcholine-gated channel complex; GO…
ENSRNOG00000009434	RGD1310507	49	43	48	47	66	75	71	194	91	114	68	86	0.7924	0.7203	0.6871	0.7428	1.0264	1.0598	1.4013	3.0301	1.4167	1.6279	1.0996	1.248	1.00703	0.000266823	0.0412549	up	8	103823196	103874985	-	protein_coding	similar to RIKEN cDNA 1300017J02 [Source:RGD Symbol%3BAcc:1310507]	K14736: TF; transferrin	rno04066: HIF-1 signaling pathway - Rattus norvegicus (rat); rno04216: Ferroptosis - Rattus norvegicus (rat); rno04978: Mineral absorption - Rattus norvegicus (rat)	GO:0004857: enzyme inhibitor activity; GO:0005615: extracellular space; GO:0005769: early endosome; GO:0005886: plasma membrane; GO:0006826: iron ion transport; GO:0019731: antibacterial humoral response; GO:0043086: negative regulation of catalytic activity; GO:0043086: negative regulation of catalytic activity; GO:0055037: recycling endosome
ENSRNOG00000023881	Skap1	4	6	4	4	6	2	4	17	31	17	8	14	0.0586	0.091	0.0519	0.0573	0.0845	0.0256	0.0715	0.2405	0.4371	0.2199	0.1172	0.184	1.84453	0.000276304	0.0412549	up	10	81425525	81732650	+	protein_coding	src kinase associated phosphoprotein 1 [Source:RGD Symbol%3BAcc:708436]	K17699: SKAP1, SKAP55; src kinase associated phosphoprotein 1	rno04015: Rap1 signaling pathway - Rattus norvegicus (rat)	GO:0001772: immunological synapse; GO:0001954: positive regulation of cell-matrix adhesion; GO:0002250: adaptive immune response; GO:0002821: positive regulation of adaptive immune response; GO:0005515: protein binding; GO:0005634: nucleus; GO:0005654: nucleoplasm; GO:0005737: cytoplasm; GO:0005737: cytoplasm; GO:0005829: cytosol; GO:0005886: plasma membrane; GO:0005886: plasma membrane; GO:00059…
ENSRNOG00000024693	Zfp831	166	213	163	259	77	332	247	429	410	604	352	493	1.4189	1.886	1.2334	2.1637	0.633	2.4798	2.5769	3.5419	3.3739	4.5593	3.0089	3.7816	1.10834	0.00026719	0.0412549	up	3	163438006	163509095	+	protein_coding	zinc finger protein 831 [Source:RGD Symbol%3BAcc:1565819]				zf-C2H2
ENSRNOG00000002571	Tekt5	15	5	29	13	7	10	32	24	52	39	19	27	0.3749	0.1295	0.6417	0.3176	0.1683	0.2184	0.9762	0.5794	1.2513	0.8609	0.4749	0.6056	1.42051	0.000292503	0.0427006	up	10	5279893	5316619	+	protein_coding	tektin 5 [Source:RGD Symbol%3BAcc:1307081]	K18632: TEKT5; tektin-5		GO:0015630: microtubule cytoskeleton; GO:0036126: sperm flagellum; GO:0036126: sperm flagellum; GO:0060271: cilium assembly; GO:0060294: cilium movement involved in cell motility
ENSRNOG00000017510	Mfge8	2	6	7	7	5	10	21	15	25	16	12	10	0.0397	0.1234	0.1231	0.1359	0.0955	0.1735	0.509	0.2877	0.4779	0.2806	0.2383	0.1782	1.52958	0.000302339	0.0437777	up	1	133064665	133080073	-	protein_coding	milk fat globule EGF and factor V/VIII domain containing [Source:RGD Symbol%3BAcc:3083]	K17253: MFGE8; lactadherin		GO:0001525: angiogenesis; GO:0001786: phosphatidylserine binding; GO:0001786: phosphatidylserine binding; GO:0002080: acrosomal membrane; GO:0005178: integrin binding; GO:0005178: integrin binding; GO:0005615: extracellular space; GO:0005615: extracellular space; GO:0006910: phagocytosis, recognition; GO:0006910: phagocytosis, recognition; GO:0006911: phagocytosis, engulfment; GO:0006911: phagocy…
