# Supplementary material for: Neuroprotective effects of ethanol extraction from Rubia yunnanensis Diels on chronic cerebral hypoperfusion: modulation of the System Xc-/GSH/GPX4 axis to alleviate oxidative stress and ferroptosis
Source: Front Pharmacol. 2025 Feb 25;16:1552228. doi: 10.3389/fphar.2025.1552228 (PMC11893507; doi:10.3389/fphar.2025.1552228)
Supplement: Supplementary file 2 [file Table3.XLSX]

## Sheet: Sheet1
GO_level_1	GO	Description	DiffRatio	BgRatio	P-value	Adjusted P-value	All_index	All_GeneName	Count_all	Up_index	Up_GeneName	Count_up	Down_index	Down_GeneName	Count_down
Molecular function	GO:0046703	natural killer cell lectin-like receptor binding	2/40 5%	16/16737 0.1%	0.000654296	0.113268	ENSRNOG00000030522;ENSRNOG00000059890	LOC500331;Clec2d2	2	ENSRNOG00000059890	Clec2d2	1	ENSRNOG00000030522	LOC500331	1
Cellular component	GO:0034702	ion channel complex	5/46 10.87%	292/18303 1.6%	0.000801513	0.0350057	ENSRNOG00000012609;ENSRNOG00000020557;ENSRNOG00000029811;ENSRNOG00000004535;ENSRNOG00000013829	Trdn;Ryr1;Kcne2;Kcng3;Chrna3	5	ENSRNOG00000012609;ENSRNOG00000020557;ENSRNOG00000004535	Trdn;Ryr1;Kcng3	3	ENSRNOG00000029811;ENSRNOG00000013829	Kcne2;Chrna3	2
Cellular component	GO:0071556	integral component of lumenal side of endoplasmic reticulum membrane	2/46 4.35%	17/18303 0.09%	0.000820447	0.0350057	ENSRNOG00000031607;ENSRNOG00000065254	LOC120093125;RT1-CE16	2	--	--	0	ENSRNOG00000031607;ENSRNOG00000065254	LOC120093125;RT1-CE16	2
Cellular component	GO:0098553	lumenal side of endoplasmic reticulum membrane	2/46 4.35%	17/18303 0.09%	0.000820447	0.0350057	ENSRNOG00000031607;ENSRNOG00000065254	LOC120093125;RT1-CE16	2	--	--	0	ENSRNOG00000031607;ENSRNOG00000065254	LOC120093125;RT1-CE16	2
Cellular component	GO:0098576	lumenal side of membrane	2/46 4.35%	23/18303 0.13%	0.00151169	0.0468428	ENSRNOG00000031607;ENSRNOG00000065254	LOC120093125;RT1-CE16	2	--	--	0	ENSRNOG00000031607;ENSRNOG00000065254	LOC120093125;RT1-CE16	2
Molecular function	GO:0099094	ligand-gated cation channel activity	3/40 7.5%	104/16737 0.62%	0.00194854	0.113268	ENSRNOG00000020557;ENSRNOG00000029811;ENSRNOG00000013829	Ryr1;Kcne2;Chrna3	3	ENSRNOG00000020557	Ryr1	1	ENSRNOG00000029811;ENSRNOG00000013829	Kcne2;Chrna3	2
Molecular function	GO:0005251	delayed rectifier potassium channel activity	2/40 5%	29/16737 0.17%	0.00217066	0.113268	ENSRNOG00000029811;ENSRNOG00000004535	Kcne2;Kcng3	2	ENSRNOG00000004535	Kcng3	1	ENSRNOG00000029811	Kcne2	1
Cellular component	GO:0034703	cation channel complex	4/46 8.7%	223/18303 1.22%	0.00234457	0.0468428	ENSRNOG00000012609;ENSRNOG00000020557;ENSRNOG00000029811;ENSRNOG00000004535	Trdn;Ryr1;Kcne2;Kcng3	4	ENSRNOG00000012609;ENSRNOG00000020557;ENSRNOG00000004535	Trdn;Ryr1;Kcng3	3	ENSRNOG00000029811	Kcne2	1
Cellular component	GO:1902495	transmembrane transporter complex	5/46 10.87%	374/18303 2.04%	0.00238969	0.0468428	ENSRNOG00000012609;ENSRNOG00000020557;ENSRNOG00000029811;ENSRNOG00000004535;ENSRNOG00000013829	Trdn;Ryr1;Kcne2;Kcng3;Chrna3	5	ENSRNOG00000012609;ENSRNOG00000020557;ENSRNOG00000004535	Trdn;Ryr1;Kcng3	3	ENSRNOG00000029811;ENSRNOG00000013829	Kcne2;Chrna3	2
Cellular component	GO:0031301	integral component of organelle membrane	5/46 10.87%	382/18303 2.09%	0.00261868	0.0468428	ENSRNOG00000005108;ENSRNOG00000031607;ENSRNOG00000065254;ENSRNOG00000020557;ENSRNOG00000011923	Wfs1;LOC120093125;RT1-CE16;Ryr1;Mgarp	5	ENSRNOG00000005108;ENSRNOG00000020557	Wfs1;Ryr1	2	ENSRNOG00000031607;ENSRNOG00000065254;ENSRNOG00000011923	LOC120093125;RT1-CE16;Mgarp	3
Biological process	GO:0007160	cell-matrix adhesion	4/44 9.09%	240/18048 1.33%	0.002728	0.0742641	ENSRNOG00000014288;ENSRNOG00000019445;ENSRNOG00000004516;ENSRNOG00000023881	Fn1;Msln;Itgbl1;Skap1	4	ENSRNOG00000014288;ENSRNOG00000019445;ENSRNOG00000004516;ENSRNOG00000023881	Fn1;Msln;Itgbl1;Skap1	4	--	--	0
Biological process	GO:0014808	release of sequestered calcium ion into cytosol by sarcoplasmic reticulum	2/44 4.55%	32/18048 0.18%	0.00275032	0.0742641	ENSRNOG00000012609;ENSRNOG00000020557	Trdn;Ryr1	2	ENSRNOG00000012609;ENSRNOG00000020557	Trdn;Ryr1	2	--	--	0
Biological process	GO:1903514	release of sequestered calcium ion into cytosol by endoplasmic reticulum	2/44 4.55%	33/18048 0.18%	0.00292323	0.0742641	ENSRNOG00000012609;ENSRNOG00000020557	Trdn;Ryr1	2	ENSRNOG00000012609;ENSRNOG00000020557	Trdn;Ryr1	2	--	--	0
Cellular component	GO:1990351	transporter complex	5/46 10.87%	398/18303 2.17%	0.00312404	0.0468428	ENSRNOG00000012609;ENSRNOG00000020557;ENSRNOG00000029811;ENSRNOG00000004535;ENSRNOG00000013829	Trdn;Ryr1;Kcne2;Kcng3;Chrna3	5	ENSRNOG00000012609;ENSRNOG00000020557;ENSRNOG00000004535	Trdn;Ryr1;Kcng3	3	ENSRNOG00000029811;ENSRNOG00000013829	Kcne2;Chrna3	2
Molecular function	GO:0046873	metal ion transmembrane transporter activity	5/40 12.5%	423/16737 2.53%	0.00319846	0.113268	ENSRNOG00000068642;ENSRNOG00000020557;ENSRNOG00000029811;ENSRNOG00000004535;ENSRNOG00000015567	Slc6a20a;Ryr1;Kcne2;Kcng3;Slc9a2	5	ENSRNOG00000068642;ENSRNOG00000020557;ENSRNOG00000004535;ENSRNOG00000015567	Slc6a20a;Ryr1;Kcng3;Slc9a2	4	ENSRNOG00000029811	Kcne2	1
Biological process	GO:0095500	acetylcholine receptor signaling pathway	2/44 4.55%	35/18048 0.19%	0.00328401	0.0791231	ENSRNOG00000027157;ENSRNOG00000013829	Ly6g6e;Chrna3	2	--	--	0	ENSRNOG00000027157;ENSRNOG00000013829	Ly6g6e;Chrna3	2
Cellular component	GO:0033017	sarcoplasmic reticulum membrane	2/46 4.35%	34/18303 0.19%	0.00329363	0.0468428	ENSRNOG00000012609;ENSRNOG00000020557	Trdn;Ryr1	2	ENSRNOG00000012609;ENSRNOG00000020557	Trdn;Ryr1	2	--	--	0
Biological process	GO:1904063	negative regulation of cation transmembrane transport	3/44 6.82%	123/18048 0.68%	0.00333696	0.0791231	ENSRNOG00000012609;ENSRNOG00000029811;ENSRNOG00000004210	Trdn;Kcne2;Osr1	3	ENSRNOG00000012609;ENSRNOG00000004210	Trdn;Osr1	2	ENSRNOG00000029811	Kcne2	1
Biological process	GO:1905145	cellular response to acetylcholine	2/44 4.55%	37/18048 0.21%	0.00366454	0.0850015	ENSRNOG00000027157;ENSRNOG00000013829	Ly6g6e;Chrna3	2	--	--	0	ENSRNOG00000027157;ENSRNOG00000013829	Ly6g6e;Chrna3	2
Cellular component	GO:0031300	intrinsic component of organelle membrane	5/46 10.87%	416/18303 2.27%	0.00377319	0.0482968	ENSRNOG00000005108;ENSRNOG00000031607;ENSRNOG00000065254;ENSRNOG00000020557;ENSRNOG00000011923	Wfs1;LOC120093125;RT1-CE16;Ryr1;Mgarp	5	ENSRNOG00000005108;ENSRNOG00000020557	Wfs1;Ryr1	2	ENSRNOG00000031607;ENSRNOG00000065254;ENSRNOG00000011923	LOC120093125;RT1-CE16;Mgarp	3
Biological process	GO:0034694	response to prostaglandin	2/44 4.55%	39/18048 0.22%	0.00406465	0.0898532	ENSRNOG00000014288;ENSRNOG00000046468	Fn1;Ptgfr	2	ENSRNOG00000014288;ENSRNOG00000046468	Fn1;Ptgfr	2	--	--	0
Biological process	GO:0070296	sarcoplasmic reticulum calcium ion transport	2/44 4.55%	39/18048 0.22%	0.00406465	0.0898532	ENSRNOG00000012609;ENSRNOG00000020557	Trdn;Ryr1	2	ENSRNOG00000012609;ENSRNOG00000020557	Trdn;Ryr1	2	--	--	0
Molecular function	GO:0015276	ligand-gated ion channel activity	3/40 7.5%	135/16737 0.81%	0.00407716	0.113268	ENSRNOG00000020557;ENSRNOG00000029811;ENSRNOG00000013829	Ryr1;Kcne2;Chrna3	3	ENSRNOG00000020557	Ryr1	1	ENSRNOG00000029811;ENSRNOG00000013829	Kcne2;Chrna3	2
Biological process	GO:0034766	negative regulation of ion transmembrane transport	3/44 6.82%	134/18048 0.74%	0.00424384	0.0898532	ENSRNOG00000012609;ENSRNOG00000029811;ENSRNOG00000004210	Trdn;Kcne2;Osr1	3	ENSRNOG00000012609;ENSRNOG00000004210	Trdn;Osr1	2	ENSRNOG00000029811	Kcne2	1
Biological process	GO:1905144	response to acetylcholine	2/44 4.55%	40/18048 0.22%	0.00427197	0.0898532	ENSRNOG00000027157;ENSRNOG00000013829	Ly6g6e;Chrna3	2	--	--	0	ENSRNOG00000027157;ENSRNOG00000013829	Ly6g6e;Chrna3	2
Cellular component	GO:0005790	smooth endoplasmic reticulum	2/46 4.35%	39/18303 0.21%	0.00431585	0.0502208	ENSRNOG00000001261;ENSRNOG00000020557	Ftcd;Ryr1	2	ENSRNOG00000020557	Ryr1	1	ENSRNOG00000001261	Ftcd	1
Molecular function	GO:0022834	ligand-gated channel activity	3/40 7.5%	138/16737 0.82%	0.00433574	0.113268	ENSRNOG00000020557;ENSRNOG00000029811;ENSRNOG00000013829	Ryr1;Kcne2;Chrna3	3	ENSRNOG00000020557	Ryr1	1	ENSRNOG00000029811;ENSRNOG00000013829	Kcne2;Chrna3	2
Biological process	GO:0001655	urogenital system development	5/44 11.36%	444/18048 2.46%	0.00434432	0.0898532	ENSRNOG00000005108;ENSRNOG00000007250;ENSRNOG00000068029;ENSRNOG00000004210;ENSRNOG00000011823	Wfs1;Six4;Six2;Osr1;Tfap2b	5	ENSRNOG00000005108;ENSRNOG00000068029;ENSRNOG00000004210;ENSRNOG00000011823	Wfs1;Six2;Osr1;Tfap2b	4	ENSRNOG00000007250	Six4	1
Biological process	GO:0043583	ear development	4/44 9.09%	274/18048 1.52%	0.00437898	0.0898532	ENSRNOG00000007250;ENSRNOG00000068029;ENSRNOG00000004210;ENSRNOG00000010917	Six4;Six2;Osr1;Bmp5	4	ENSRNOG00000068029;ENSRNOG00000004210;ENSRNOG00000010917	Six2;Osr1;Bmp5	3	ENSRNOG00000007250	Six4	1
Biological process	GO:0014902	myotube differentiation	3/44 6.82%	141/18048 0.78%	0.00489167	0.0984794	ENSRNOG00000012609;ENSRNOG00000007250;ENSRNOG00000020557	Trdn;Six4;Ryr1	3	ENSRNOG00000012609;ENSRNOG00000020557	Trdn;Ryr1	2	ENSRNOG00000007250	Six4	1
Biological process	GO:0050773	regulation of dendrite development	3/44 6.82%	143/18048 0.79%	0.00508712	0.0988232	ENSRNOG00000011923;ENSRNOG00000010917;ENSRNOG00000013829	Mgarp;Bmp5;Chrna3	3	ENSRNOG00000010917	Bmp5	1	ENSRNOG00000011923;ENSRNOG00000013829	Mgarp;Chrna3	2
Molecular function	GO:0005178	integrin binding	3/40 7.5%	147/16737 0.88%	0.00517055	0.113268	ENSRNOG00000014288;ENSRNOG00000004516;ENSRNOG00000017510	Fn1;Itgbl1;Mfge8	3	ENSRNOG00000014288;ENSRNOG00000004516;ENSRNOG00000017510	Fn1;Itgbl1;Mfge8	3	--	--	0
Biological process	GO:0042471	ear morphogenesis	3/44 6.82%	144/18048 0.8%	0.0051866	0.0988232	ENSRNOG00000007250;ENSRNOG00000068029;ENSRNOG00000004210	Six4;Six2;Osr1	3	ENSRNOG00000068029;ENSRNOG00000004210	Six2;Osr1	2	ENSRNOG00000007250	Six4	1
Biological process	GO:0048706	embryonic skeletal system development	3/44 6.82%	144/18048 0.8%	0.0051866	0.0988232	ENSRNOG00000007250;ENSRNOG00000068029;ENSRNOG00000004210	Six4;Six2;Osr1	3	ENSRNOG00000068029;ENSRNOG00000004210	Six2;Osr1	2	ENSRNOG00000007250	Six4	1
Biological process	GO:1901021	positive regulation of calcium ion transmembrane transporter activity	2/44 4.55%	45/18048 0.25%	0.00538044	0.0991402	ENSRNOG00000012609;ENSRNOG00000029811	Trdn;Kcne2	2	ENSRNOG00000012609	Trdn	1	ENSRNOG00000029811	Kcne2	1
Biological process	GO:0003014	renal system process	3/44 6.82%	146/18048 0.81%	0.00538906	0.0991402	ENSRNOG00000005108;ENSRNOG00000011823;ENSRNOG00000013829	Wfs1;Tfap2b;Chrna3	3	ENSRNOG00000005108;ENSRNOG00000011823	Wfs1;Tfap2b	2	ENSRNOG00000013829	Chrna3	1
Molecular function	GO:0002020	protease binding	3/40 7.5%	151/16737 0.9%	0.00557055	0.113268	ENSRNOG00000062986;ENSRNOG00000014288;ENSRNOG00000020557	Ccbe1;Fn1;Ryr1	3	ENSRNOG00000062986;ENSRNOG00000014288;ENSRNOG00000020557	Ccbe1;Fn1;Ryr1	3	--	--	0
Molecular function	GO:0022843	voltage-gated cation channel activity	3/40 7.5%	151/16737 0.9%	0.00557055	0.113268	ENSRNOG00000020557;ENSRNOG00000029811;ENSRNOG00000004535	Ryr1;Kcne2;Kcng3	3	ENSRNOG00000020557;ENSRNOG00000004535	Ryr1;Kcng3	2	ENSRNOG00000029811	Kcne2	1
Biological process	GO:0035136	forelimb morphogenesis	2/44 4.55%	46/18048 0.25%	0.00561634	0.0998773	ENSRNOG00000004210;ENSRNOG00000011823	Osr1;Tfap2b	2	ENSRNOG00000004210;ENSRNOG00000011823	Osr1;Tfap2b	2	--	--	0
Biological process	GO:0035137	hindlimb morphogenesis	2/44 4.55%	46/18048 0.25%	0.00561634	0.0998773	ENSRNOG00000004210;ENSRNOG00000011823	Osr1;Tfap2b	2	ENSRNOG00000004210;ENSRNOG00000011823	Osr1;Tfap2b	2	--	--	0
Cellular component	GO:0030670	phagocytic vesicle membrane	2/46 4.35%	45/18303 0.25%	0.00571123	0.0609198	ENSRNOG00000031607;ENSRNOG00000065254	LOC120093125;RT1-CE16	2	--	--	0	ENSRNOG00000031607;ENSRNOG00000065254	LOC120093125;RT1-CE16	2
Biological process	GO:0051928	positive regulation of calcium ion transport	3/44 6.82%	154/18048 0.85%	0.00624632	0.109259	ENSRNOG00000005108;ENSRNOG00000012609;ENSRNOG00000029811	Wfs1;Trdn;Kcne2	3	ENSRNOG00000005108;ENSRNOG00000012609	Wfs1;Trdn	2	ENSRNOG00000029811	Kcne2	1
Biological process	GO:0035850	epithelial cell differentiation involved in kidney development	2/44 4.55%	49/18048 0.27%	0.00635201	0.109316	ENSRNOG00000068029;ENSRNOG00000004210	Six2;Osr1	2	ENSRNOG00000068029;ENSRNOG00000004210	Six2;Osr1	2	--	--	0
Molecular function	GO:0015079	potassium ion transmembrane transporter activity	3/40 7.5%	160/16737 0.96%	0.00653729	0.119091	ENSRNOG00000029811;ENSRNOG00000004535;ENSRNOG00000015567	Kcne2;Kcng3;Slc9a2	3	ENSRNOG00000004535;ENSRNOG00000015567	Kcng3;Slc9a2	2	ENSRNOG00000029811	Kcne2	1
Biological process	GO:0001838	embryonic epithelial tube formation	3/44 6.82%	158/18048 0.88%	0.0067038	0.112701	ENSRNOG00000007250;ENSRNOG00000004210;ENSRNOG00000010917	Six4;Osr1;Bmp5	3	ENSRNOG00000004210;ENSRNOG00000010917	Osr1;Bmp5	2	ENSRNOG00000007250	Six4	1
Cellular component	GO:0030176	integral component of endoplasmic reticulum membrane	3/46 6.52%	154/18303 0.84%	0.00680508	0.0670039	ENSRNOG00000005108;ENSRNOG00000031607;ENSRNOG00000065254	Wfs1;LOC120093125;RT1-CE16	3	ENSRNOG00000005108	Wfs1	1	ENSRNOG00000031607;ENSRNOG00000065254	LOC120093125;RT1-CE16	2
Biological process	GO:0048701	embryonic cranial skeleton morphogenesis	2/44 4.55%	51/18048 0.28%	0.00686555	0.112701	ENSRNOG00000007250;ENSRNOG00000068029	Six4;Six2	2	ENSRNOG00000068029	Six2	1	ENSRNOG00000007250	Six4	1
Biological process	GO:0098926	postsynaptic signal transduction	2/44 4.55%	51/18048 0.28%	0.00686555	0.112701	ENSRNOG00000027157;ENSRNOG00000013829	Ly6g6e;Chrna3	2	--	--	0	ENSRNOG00000027157;ENSRNOG00000013829	Ly6g6e;Chrna3	2
Biological process	GO:0010039	response to iron ion	2/44 4.55%	54/18048 0.3%	0.00767004	0.123999	ENSRNOG00000014288;ENSRNOG00000011719	Fn1;Ngb	2	ENSRNOG00000014288	Fn1	1	ENSRNOG00000011719	Ngb	1
Cellular component	GO:0031227	intrinsic component of endoplasmic reticulum membrane	3/46 6.52%	162/18303 0.89%	0.00781962	0.0714936	ENSRNOG00000005108;ENSRNOG00000031607;ENSRNOG00000065254	Wfs1;LOC120093125;RT1-CE16	3	ENSRNOG00000005108	Wfs1	1	ENSRNOG00000031607;ENSRNOG00000065254	LOC120093125;RT1-CE16	2
Molecular function	GO:0022836	gated channel activity	4/40 10%	332/16737 1.98%	0.00791955	0.119091	ENSRNOG00000020557;ENSRNOG00000029811;ENSRNOG00000004535;ENSRNOG00000013829	Ryr1;Kcne2;Kcng3;Chrna3	4	ENSRNOG00000020557;ENSRNOG00000004535	Ryr1;Kcng3	2	ENSRNOG00000029811;ENSRNOG00000013829	Kcne2;Chrna3	2
Biological process	GO:0090596	sensory organ morphogenesis	4/44 9.09%	327/18048 1.81%	0.00812219	0.128576	ENSRNOG00000007250;ENSRNOG00000068029;ENSRNOG00000004210;ENSRNOG00000011823	Six4;Six2;Osr1;Tfap2b	4	ENSRNOG00000068029;ENSRNOG00000004210;ENSRNOG00000011823	Six2;Osr1;Tfap2b	3	ENSRNOG00000007250	Six4	1
Biological process	GO:0072175	epithelial tube formation	3/44 6.82%	170/18048 0.94%	0.00819413	0.128576	ENSRNOG00000007250;ENSRNOG00000004210;ENSRNOG00000010917	Six4;Osr1;Bmp5	3	ENSRNOG00000004210;ENSRNOG00000010917	Osr1;Bmp5	2	ENSRNOG00000007250	Six4	1
Molecular function	GO:0005261	cation channel activity	4/40 10%	337/16737 2.01%	0.00833835	0.119091	ENSRNOG00000020557;ENSRNOG00000029811;ENSRNOG00000004535;ENSRNOG00000013829	Ryr1;Kcne2;Kcng3;Chrna3	4	ENSRNOG00000020557;ENSRNOG00000004535	Ryr1;Kcng3	2	ENSRNOG00000029811;ENSRNOG00000013829	Kcne2;Chrna3	2
Molecular function	GO:0050661	NADP binding	2/40 5%	58/16737 0.35%	0.00846004	0.119091	ENSRNOG00000061215;ENSRNOG00000003620	Crym;Fmo3	2	ENSRNOG00000061215;ENSRNOG00000003620	Crym;Fmo3	2	--	--	0
Biological process	GO:0034763	negative regulation of transmembrane transport	3/44 6.82%	174/18048 0.96%	0.00873085	0.130493	ENSRNOG00000012609;ENSRNOG00000029811;ENSRNOG00000004210	Trdn;Kcne2;Osr1	3	ENSRNOG00000012609;ENSRNOG00000004210	Trdn;Osr1	2	ENSRNOG00000029811	Kcne2	1
Biological process	GO:0010463	mesenchymal cell proliferation	2/44 4.55%	58/18048 0.32%	0.00880553	0.130493	ENSRNOG00000068029;ENSRNOG00000004210	Six2;Osr1	2	ENSRNOG00000068029;ENSRNOG00000004210	Six2;Osr1	2	--	--	0
Biological process	GO:0030857	negative regulation of epithelial cell differentiation	2/44 4.55%	58/18048 0.32%	0.00880553	0.130493	ENSRNOG00000068029;ENSRNOG00000004210	Six2;Osr1	2	ENSRNOG00000068029;ENSRNOG00000004210	Six2;Osr1	2	--	--	0
Biological process	GO:0048483	autonomic nervous system development	2/44 4.55%	58/18048 0.32%	0.00880553	0.130493	ENSRNOG00000014288;ENSRNOG00000011823	Fn1;Tfap2b	2	ENSRNOG00000014288;ENSRNOG00000011823	Fn1;Tfap2b	2	--	--	0
Biological process	GO:0061005	cell differentiation involved in kidney development	2/44 4.55%	59/18048 0.33%	0.00910048	0.131219	ENSRNOG00000068029;ENSRNOG00000004210	Six2;Osr1	2	ENSRNOG00000068029;ENSRNOG00000004210	Six2;Osr1	2	--	--	0
Biological process	GO:0072132	mesenchyme morphogenesis	2/44 4.55%	59/18048 0.33%	0.00910048	0.131219	ENSRNOG00000004210;ENSRNOG00000010917	Osr1;Bmp5	2	ENSRNOG00000004210;ENSRNOG00000010917	Osr1;Bmp5	2	--	--	0
Biological process	GO:0055074	calcium ion homeostasis	4/44 9.09%	340/18048 1.88%	0.00928537	0.1321	ENSRNOG00000005108;ENSRNOG00000012609;ENSRNOG00000020557;ENSRNOG00000011823	Wfs1;Trdn;Ryr1;Tfap2b	4	ENSRNOG00000005108;ENSRNOG00000012609;ENSRNOG00000020557;ENSRNOG00000011823	Wfs1;Trdn;Ryr1;Tfap2b	4	--	--	0
Cellular component	GO:0030666	endocytic vesicle membrane	2/46 4.35%	60/18303 0.33%	0.00997018	0.0850788	ENSRNOG00000031607;ENSRNOG00000065254	LOC120093125;RT1-CE16	2	--	--	0	ENSRNOG00000031607;ENSRNOG00000065254	LOC120093125;RT1-CE16	2
Biological process	GO:0035725	sodium ion transmembrane transport	3/44 6.82%	184/18048 1.02%	0.0101616	0.14132	ENSRNOG00000068642;ENSRNOG00000015567;ENSRNOG00000004210	Slc6a20a;Slc9a2;Osr1	3	ENSRNOG00000068642;ENSRNOG00000015567;ENSRNOG00000004210	Slc6a20a;Slc9a2;Osr1	3	--	--	0
Biological process	GO:0045744	negative regulation of G protein-coupled receptor signaling pathway	2/44 4.55%	63/18048 0.35%	0.0103239	0.14132	ENSRNOG00000027157;ENSRNOG00000030568	Ly6g6e;Rgs12	2	ENSRNOG00000030568	Rgs12	1	ENSRNOG00000027157	Ly6g6e	1
Biological process	GO:0016331	morphogenesis of embryonic epithelium	3/44 6.82%	186/18048 1.03%	0.0104632	0.14132	ENSRNOG00000007250;ENSRNOG00000004210;ENSRNOG00000010917	Six4;Osr1;Bmp5	3	ENSRNOG00000004210;ENSRNOG00000010917	Osr1;Bmp5	2	ENSRNOG00000007250	Six4	1
Biological process	GO:0035148	tube formation	3/44 6.82%	186/18048 1.03%	0.0104632	0.14132	ENSRNOG00000007250;ENSRNOG00000004210;ENSRNOG00000010917	Six4;Osr1;Bmp5	3	ENSRNOG00000004210;ENSRNOG00000010917	Osr1;Bmp5	2	ENSRNOG00000007250	Six4	1
Cellular component	GO:0098802	plasma membrane signaling receptor complex	3/46 6.52%	183/18303 1%	0.0108907	0.0871257	ENSRNOG00000004516;ENSRNOG00000013829;ENSRNOG00000023881	Itgbl1;Chrna3;Skap1	3	ENSRNOG00000004516;ENSRNOG00000023881	Itgbl1;Skap1	2	ENSRNOG00000013829	Chrna3	1
Biological process	GO:0060688	regulation of morphogenesis of a branching structure	2/44 4.55%	66/18048 0.37%	0.0112867	0.150536	ENSRNOG00000007250;ENSRNOG00000068029	Six4;Six2	2	ENSRNOG00000068029	Six2	1	ENSRNOG00000007250	Six4	1
Molecular function	GO:0005244	voltage-gated ion channel activity	3/40 7.5%	196/16737 1.17%	0.0113678	0.138688	ENSRNOG00000020557;ENSRNOG00000029811;ENSRNOG00000004535	Ryr1;Kcne2;Kcng3	3	ENSRNOG00000020557;ENSRNOG00000004535	Ryr1;Kcng3	2	ENSRNOG00000029811	Kcne2	1
Molecular function	GO:0022832	voltage-gated channel activity	3/40 7.5%	196/16737 1.17%	0.0113678	0.138688	ENSRNOG00000020557;ENSRNOG00000029811;ENSRNOG00000004535	Ryr1;Kcne2;Kcng3	3	ENSRNOG00000020557;ENSRNOG00000004535	Ryr1;Kcng3	2	ENSRNOG00000029811	Kcne2	1
Biological process	GO:0071772	response to BMP	3/44 6.82%	194/18048 1.07%	0.0117214	0.152522	ENSRNOG00000014288;ENSRNOG00000011823;ENSRNOG00000010917	Fn1;Tfap2b;Bmp5	3	ENSRNOG00000014288;ENSRNOG00000011823;ENSRNOG00000010917	Fn1;Tfap2b;Bmp5	3	--	--	0
Biological process	GO:0071773	cellular response to BMP stimulus	3/44 6.82%	194/18048 1.07%	0.0117214	0.152522	ENSRNOG00000014288;ENSRNOG00000011823;ENSRNOG00000010917	Fn1;Tfap2b;Bmp5	3	ENSRNOG00000014288;ENSRNOG00000011823;ENSRNOG00000010917	Fn1;Tfap2b;Bmp5	3	--	--	0
Cellular component	GO:0034704	calcium channel complex	2/46 4.35%	66/18303 0.36%	0.0119679	0.0901113	ENSRNOG00000012609;ENSRNOG00000020557	Trdn;Ryr1	2	ENSRNOG00000012609;ENSRNOG00000020557	Trdn;Ryr1	2	--	--	0
Biological process	GO:0001658	branching involved in ureteric bud morphogenesis	2/44 4.55%	69/18048 0.38%	0.0122875	0.154244	ENSRNOG00000007250;ENSRNOG00000068029	Six4;Six2	2	ENSRNOG00000068029	Six2	1	ENSRNOG00000007250	Six4	1
Biological process	GO:0050891	multicellular organismal water homeostasis	2/44 4.55%	69/18048 0.38%	0.0122875	0.154244	ENSRNOG00000005108;ENSRNOG00000011823	Wfs1;Tfap2b	2	ENSRNOG00000005108;ENSRNOG00000011823	Wfs1;Tfap2b	2	--	--	0
Biological process	GO:0061337	cardiac conduction	2/44 4.55%	69/18048 0.38%	0.0122875	0.154244	ENSRNOG00000012609;ENSRNOG00000029811	Trdn;Kcne2	2	ENSRNOG00000012609	Trdn	1	ENSRNOG00000029811	Kcne2	1
Biological process	GO:0043524	negative regulation of neuron apoptotic process	3/44 6.82%	200/18048 1.11%	0.0127201	0.157818	ENSRNOG00000005108;ENSRNOG00000007250;ENSRNOG00000011823	Wfs1;Six4;Tfap2b	3	ENSRNOG00000005108;ENSRNOG00000011823	Wfs1;Tfap2b	2	ENSRNOG00000007250	Six4	1
Cellular component	GO:0016529	sarcoplasmic reticulum	2/46 4.35%	70/18303 0.38%	0.0133891	0.0952113	ENSRNOG00000012609;ENSRNOG00000020557	Trdn;Ryr1	2	ENSRNOG00000012609;ENSRNOG00000020557	Trdn;Ryr1	2	--	--	0
Biological process	GO:0098739	import across plasma membrane	3/44 6.82%	204/18048 1.13%	0.0134122	0.164084	ENSRNOG00000068642;ENSRNOG00000029811;ENSRNOG00000015567	Slc6a20a;Kcne2;Slc9a2	3	ENSRNOG00000068642;ENSRNOG00000015567	Slc6a20a;Slc9a2	2	ENSRNOG00000029811	Kcne2	1
Biological process	GO:0072507	divalent inorganic cation homeostasis	4/44 9.09%	380/18048 2.11%	0.0135327	0.164084	ENSRNOG00000005108;ENSRNOG00000012609;ENSRNOG00000020557;ENSRNOG00000011823	Wfs1;Trdn;Ryr1;Tfap2b	4	ENSRNOG00000005108;ENSRNOG00000012609;ENSRNOG00000020557;ENSRNOG00000011823	Wfs1;Trdn;Ryr1;Tfap2b	4	--	--	0
Biological process	GO:0031589	cell-substrate adhesion	4/44 9.09%	385/18048 2.13%	0.0141378	0.169495	ENSRNOG00000014288;ENSRNOG00000019445;ENSRNOG00000004516;ENSRNOG00000023881	Fn1;Msln;Itgbl1;Skap1	4	ENSRNOG00000014288;ENSRNOG00000019445;ENSRNOG00000004516;ENSRNOG00000023881	Fn1;Msln;Itgbl1;Skap1	4	--	--	0
Biological process	GO:1905330	regulation of morphogenesis of an epithelium	2/44 4.55%	75/18048 0.42%	0.0144011	0.170733	ENSRNOG00000007250;ENSRNOG00000068029	Six4;Six2	2	ENSRNOG00000068029	Six2	1	ENSRNOG00000007250	Six4	1
Biological process	GO:0043271	negative regulation of ion transport	3/44 6.82%	212/18048 1.17%	0.0148603	0.171835	ENSRNOG00000012609;ENSRNOG00000029811;ENSRNOG00000004210	Trdn;Kcne2;Osr1	3	ENSRNOG00000012609;ENSRNOG00000004210	Trdn;Osr1	2	ENSRNOG00000029811	Kcne2	1
Biological process	GO:0007369	gastrulation	3/44 6.82%	213/18048 1.18%	0.0150473	0.171835	ENSRNOG00000014288;ENSRNOG00000068029;ENSRNOG00000004210	Fn1;Six2;Osr1	3	ENSRNOG00000014288;ENSRNOG00000068029;ENSRNOG00000004210	Fn1;Six2;Osr1	3	--	--	0
Biological process	GO:0035924	cellular response to vascular endothelial growth factor stimulus	2/44 4.55%	77/18048 0.43%	0.0151382	0.171835	ENSRNOG00000062986;ENSRNOG00000014288	Ccbe1;Fn1	2	ENSRNOG00000062986;ENSRNOG00000014288	Ccbe1;Fn1	2	--	--	0
Biological process	GO:0060675	ureteric bud morphogenesis	2/44 4.55%	77/18048 0.43%	0.0151382	0.171835	ENSRNOG00000007250;ENSRNOG00000068029	Six4;Six2	2	ENSRNOG00000068029	Six2	1	ENSRNOG00000007250	Six4	1
Cellular component	GO:0008076	voltage-gated potassium channel complex	2/46 4.35%	75/18303 0.41%	0.0152635	0.102828	ENSRNOG00000029811;ENSRNOG00000004535	Kcne2;Kcng3	2	ENSRNOG00000004535	Kcng3	1	ENSRNOG00000029811	Kcne2	1
Biological process	GO:0030104	water homeostasis	2/44 4.55%	80/18048 0.44%	0.0162737	0.18278	ENSRNOG00000005108;ENSRNOG00000011823	Wfs1;Tfap2b	2	ENSRNOG00000005108;ENSRNOG00000011823	Wfs1;Tfap2b	2	--	--	0
Biological process	GO:0060562	epithelial tube morphogenesis	4/44 9.09%	404/18048 2.24%	0.0165938	0.184433	ENSRNOG00000007250;ENSRNOG00000068029;ENSRNOG00000004210;ENSRNOG00000010917	Six4;Six2;Osr1;Bmp5	4	ENSRNOG00000068029;ENSRNOG00000004210;ENSRNOG00000010917	Six2;Osr1;Bmp5	3	ENSRNOG00000007250	Six4	1
Biological process	GO:1904888	cranial skeletal system development	2/44 4.55%	82/18048 0.45%	0.0170505	0.187556	ENSRNOG00000007250;ENSRNOG00000068029	Six4;Six2	2	ENSRNOG00000068029	Six2	1	ENSRNOG00000007250	Six4	1
Biological process	GO:0033627	cell adhesion mediated by integrin	2/44 4.55%	87/18048 0.48%	0.0190602	0.206554	ENSRNOG00000004516;ENSRNOG00000023881	Itgbl1;Skap1	2	ENSRNOG00000004516;ENSRNOG00000023881	Itgbl1;Skap1	2	--	--	0
Molecular function	GO:0005216	ion channel activity	4/40 10%	431/16737 2.58%	0.019083	0.152041	ENSRNOG00000020557;ENSRNOG00000029811;ENSRNOG00000004535;ENSRNOG00000013829	Ryr1;Kcne2;Kcng3;Chrna3	4	ENSRNOG00000020557;ENSRNOG00000004535	Ryr1;Kcng3	2	ENSRNOG00000029811;ENSRNOG00000013829	Kcne2;Chrna3	2
Cellular component	GO:0031012	extracellular matrix	4/46 8.7%	411/18303 2.25%	0.0194695	0.12057	ENSRNOG00000053753;ENSRNOG00000062986;ENSRNOG00000014288;ENSRNOG00000014021	Thsd4;Ccbe1;Fn1;Matn4	4	ENSRNOG00000053753;ENSRNOG00000062986;ENSRNOG00000014288	Thsd4;Ccbe1;Fn1	3	ENSRNOG00000014021	Matn4	1
Biological process	GO:2001259	positive regulation of cation channel activity	2/44 4.55%	88/18048 0.49%	0.0194736	0.206554	ENSRNOG00000012609;ENSRNOG00000029811	Trdn;Kcne2	2	ENSRNOG00000012609	Trdn	1	ENSRNOG00000029811	Kcne2	1
Cellular component	GO:0030312	external encapsulating structure	4/46 8.7%	413/18303 2.26%	0.019781	0.12057	ENSRNOG00000053753;ENSRNOG00000062986;ENSRNOG00000014288;ENSRNOG00000014021	Thsd4;Ccbe1;Fn1;Matn4	4	ENSRNOG00000053753;ENSRNOG00000062986;ENSRNOG00000014288	Thsd4;Ccbe1;Fn1	3	ENSRNOG00000014021	Matn4	1
Biological process	GO:0071805	potassium ion transmembrane transport	3/44 6.82%	238/18048 1.32%	0.0201603	0.206554	ENSRNOG00000029811;ENSRNOG00000004535;ENSRNOG00000015567	Kcne2;Kcng3;Slc9a2	3	ENSRNOG00000004535;ENSRNOG00000015567	Kcng3;Slc9a2	2	ENSRNOG00000029811	Kcne2	1
Cellular component	GO:0034705	potassium channel complex	2/46 4.35%	89/18303 0.49%	0.0210672	0.122573	ENSRNOG00000029811;ENSRNOG00000004535	Kcne2;Kcng3	2	ENSRNOG00000004535	Kcng3	1	ENSRNOG00000029811	Kcne2	1
Molecular function	GO:0005249	voltage-gated potassium channel activity	2/40 5%	97/16737 0.58%	0.022477	0.152041	ENSRNOG00000029811;ENSRNOG00000004535	Kcne2;Kcng3	2	ENSRNOG00000004535	Kcng3	1	ENSRNOG00000029811	Kcne2	1
Biological process	GO:0048762	mesenchymal cell differentiation	3/44 6.82%	252/18048 1.4%	0.0233936	0.206554	ENSRNOG00000014288;ENSRNOG00000068029;ENSRNOG00000004210	Fn1;Six2;Osr1	3	ENSRNOG00000014288;ENSRNOG00000068029;ENSRNOG00000004210	Fn1;Six2;Osr1	3	--	--	0
Molecular function	GO:0008429	phosphatidylethanolamine binding	1/40 2.5%	10/16737 0.06%	0.02365	0.152041	ENSRNOG00000017510	Mfge8	1	ENSRNOG00000017510	Mfge8	1	--	--	0
Molecular function	GO:0016742	hydroxymethyl-, formyl- and related transferase activity	1/40 2.5%	10/16737 0.06%	0.02365	0.152041	ENSRNOG00000001261	Ftcd	1	--	--	0	ENSRNOG00000001261	Ftcd	1
Molecular function	GO:1902282	voltage-gated potassium channel activity involved in ventricular cardiac muscle cell action potential repolarization	1/40 2.5%	10/16737 0.06%	0.02365	0.152041	ENSRNOG00000029811	Kcne2	1	--	--	0	ENSRNOG00000029811	Kcne2	1
Biological process	GO:0001503	ossification	4/44 9.09%	451/18048 2.5%	0.0237762	0.206554	ENSRNOG00000014288;ENSRNOG00000068029;ENSRNOG00000020557;ENSRNOG00000004210	Fn1;Six2;Ryr1;Osr1	4	ENSRNOG00000014288;ENSRNOG00000068029;ENSRNOG00000020557;ENSRNOG00000004210	Fn1;Six2;Ryr1;Osr1	4	--	--	0
Cellular component	GO:0005793	endoplasmic reticulum-Golgi intermediate compartment	2/46 4.35%	95/18303 0.52%	0.023794	0.126901	ENSRNOG00000014288;ENSRNOG00000001261	Fn1;Ftcd	2	ENSRNOG00000014288	Fn1	1	ENSRNOG00000001261	Ftcd	1
Cellular component	GO:0016528	sarcoplasm	2/46 4.35%	95/18303 0.52%	0.023794	0.126901	ENSRNOG00000012609;ENSRNOG00000020557	Trdn;Ryr1	2	ENSRNOG00000012609;ENSRNOG00000020557	Trdn;Ryr1	2	--	--	0
Biological process	GO:0032413	negative regulation of ion transmembrane transporter activity	2/44 4.55%	98/18048 0.54%	0.0238119	0.206554	ENSRNOG00000029811;ENSRNOG00000004210	Kcne2;Osr1	2	ENSRNOG00000004210	Osr1	1	ENSRNOG00000029811	Kcne2	1
Biological process	GO:0014816	skeletal muscle satellite cell differentiation	1/44 2.27%	10/18048 0.06%	0.0241197	0.206554	ENSRNOG00000007250	Six4	1	--	--	0	ENSRNOG00000007250	Six4	1
Biological process	GO:0015824	proline transport	1/44 2.27%	10/18048 0.06%	0.0241197	0.206554	ENSRNOG00000068642	Slc6a20a	1	ENSRNOG00000068642	Slc6a20a	1	--	--	0
Biological process	GO:0015870	acetylcholine transport	1/44 2.27%	10/18048 0.06%	0.0241197	0.206554	ENSRNOG00000013829	Chrna3	1	--	--	0	ENSRNOG00000013829	Chrna3	1
Biological process	GO:0035095	behavioral response to nicotine	1/44 2.27%	10/18048 0.06%	0.0241197	0.206554	ENSRNOG00000013829	Chrna3	1	--	--	0	ENSRNOG00000013829	Chrna3	1
Biological process	GO:0035524	proline transmembrane transport	1/44 2.27%	10/18048 0.06%	0.0241197	0.206554	ENSRNOG00000068642	Slc6a20a	1	ENSRNOG00000068642	Slc6a20a	1	--	--	0
Biological process	GO:0050861	positive regulation of B cell receptor signaling pathway	1/44 2.27%	10/18048 0.06%	0.0241197	0.206554	ENSRNOG00000022975	Nfam1	1	ENSRNOG00000022975	Nfam1	1	--	--	0
Biological process	GO:0060710	chorio-allantoic fusion	1/44 2.27%	10/18048 0.06%	0.0241197	0.206554	ENSRNOG00000010917	Bmp5	1	ENSRNOG00000010917	Bmp5	1	--	--	0
Biological process	GO:0072203	cell proliferation involved in metanephros development	1/44 2.27%	10/18048 0.06%	0.0241197	0.206554	ENSRNOG00000004210	Osr1	1	ENSRNOG00000004210	Osr1	1	--	--	0
Biological process	GO:0097168	mesenchymal stem cell proliferation	1/44 2.27%	10/18048 0.06%	0.0241197	0.206554	ENSRNOG00000068029	Six2	1	ENSRNOG00000068029	Six2	1	--	--	0
Biological process	GO:0098528	skeletal muscle fiber differentiation	1/44 2.27%	10/18048 0.06%	0.0241197	0.206554	ENSRNOG00000007250	Six4	1	--	--	0	ENSRNOG00000007250	Six4	1
Biological process	GO:1902732	positive regulation of chondrocyte proliferation	1/44 2.27%	10/18048 0.06%	0.0241197	0.206554	ENSRNOG00000068029	Six2	1	ENSRNOG00000068029	Six2	1	--	--	0
Biological process	GO:1904396	regulation of neuromuscular junction development	1/44 2.27%	10/18048 0.06%	0.0241197	0.206554	ENSRNOG00000007250	Six4	1	--	--	0	ENSRNOG00000007250	Six4	1
Biological process	GO:1901019	regulation of calcium ion transmembrane transporter activity	2/44 4.55%	99/18048 0.55%	0.0242657	0.206554	ENSRNOG00000012609;ENSRNOG00000029811	Trdn;Kcne2	2	ENSRNOG00000012609	Trdn	1	ENSRNOG00000029811	Kcne2	1
Biological process	GO:0098657	import into cell	3/44 6.82%	256/18048 1.42%	0.0243665	0.206554	ENSRNOG00000068642;ENSRNOG00000029811;ENSRNOG00000015567	Slc6a20a;Kcne2;Slc9a2	3	ENSRNOG00000068642;ENSRNOG00000015567	Slc6a20a;Slc9a2	2	ENSRNOG00000029811	Kcne2	1
Molecular function	GO:0072341	modified amino acid binding	2/40 5%	103/16737 0.62%	0.0251329	0.152041	ENSRNOG00000001261;ENSRNOG00000017510	Ftcd;Mfge8	2	ENSRNOG00000017510	Mfge8	1	ENSRNOG00000001261	Ftcd	1
Biological process	GO:0006814	sodium ion transport	3/44 6.82%	261/18048 1.45%	0.0256131	0.206554	ENSRNOG00000068642;ENSRNOG00000015567;ENSRNOG00000004210	Slc6a20a;Slc9a2;Osr1	3	ENSRNOG00000068642;ENSRNOG00000015567;ENSRNOG00000004210	Slc6a20a;Slc9a2;Osr1	3	--	--	0
Molecular function	GO:0004955	prostaglandin receptor activity	1/40 2.5%	11/16737 0.07%	0.0259848	0.152041	ENSRNOG00000046468	Ptgfr	1	ENSRNOG00000046468	Ptgfr	1	--	--	0
Molecular function	GO:0015385	sodium:proton antiporter activity	1/40 2.5%	11/16737 0.07%	0.0259848	0.152041	ENSRNOG00000015567	Slc9a2	1	ENSRNOG00000015567	Slc9a2	1	--	--	0
Biological process	GO:0048705	skeletal system morphogenesis	3/44 6.82%	264/18048 1.46%	0.0263774	0.206554	ENSRNOG00000007250;ENSRNOG00000068029;ENSRNOG00000004210	Six4;Six2;Osr1	3	ENSRNOG00000068029;ENSRNOG00000004210	Six2;Osr1	2	ENSRNOG00000007250	Six4	1
Biological process	GO:0010193	response to ozone	1/44 2.27%	11/18048 0.06%	0.0265001	0.206554	ENSRNOG00000014288	Fn1	1	ENSRNOG00000014288	Fn1	1	--	--	0
Biological process	GO:0031943	regulation of glucocorticoid metabolic process	1/44 2.27%	11/18048 0.06%	0.0265001	0.206554	ENSRNOG00000010917	Bmp5	1	ENSRNOG00000010917	Bmp5	1	--	--	0
Biological process	GO:0034651	cortisol biosynthetic process	1/44 2.27%	11/18048 0.06%	0.0265001	0.206554	ENSRNOG00000010917	Bmp5	1	ENSRNOG00000010917	Bmp5	1	--	--	0
Biological process	GO:0042117	monocyte activation	1/44 2.27%	11/18048 0.06%	0.0265001	0.206554	ENSRNOG00000014288	Fn1	1	ENSRNOG00000014288	Fn1	1	--	--	0
Biological process	GO:0070327	thyroid hormone transport	1/44 2.27%	11/18048 0.06%	0.0265001	0.206554	ENSRNOG00000061215	Crym	1	ENSRNOG00000061215	Crym	1	--	--	0
Biological process	GO:0086064	cell communication by electrical coupling involved in cardiac conduction	1/44 2.27%	11/18048 0.06%	0.0265001	0.206554	ENSRNOG00000012609	Trdn	1	ENSRNOG00000012609	Trdn	1	--	--	0
Biological process	GO:0098915	membrane repolarization during ventricular cardiac muscle cell action potential	1/44 2.27%	11/18048 0.06%	0.0265001	0.206554	ENSRNOG00000029811	Kcne2	1	--	--	0	ENSRNOG00000029811	Kcne2	1
Biological process	GO:1901374	acetate ester transport	1/44 2.27%	11/18048 0.06%	0.0265001	0.206554	ENSRNOG00000013829	Chrna3	1	--	--	0	ENSRNOG00000013829	Chrna3	1
Biological process	GO:1902645	tertiary alcohol biosynthetic process	1/44 2.27%	11/18048 0.06%	0.0265001	0.206554	ENSRNOG00000010917	Bmp5	1	ENSRNOG00000010917	Bmp5	1	--	--	0
Biological process	GO:2000171	negative regulation of dendrite development	1/44 2.27%	11/18048 0.06%	0.0265001	0.206554	ENSRNOG00000011923	Mgarp	1	--	--	0	ENSRNOG00000011923	Mgarp	1
Molecular function	GO:0015267	channel activity	4/40 10%	479/16737 2.86%	0.0268716	0.152041	ENSRNOG00000020557;ENSRNOG00000029811;ENSRNOG00000004535;ENSRNOG00000013829	Ryr1;Kcne2;Kcng3;Chrna3	4	ENSRNOG00000020557;ENSRNOG00000004535	Ryr1;Kcng3	2	ENSRNOG00000029811;ENSRNOG00000013829	Kcne2;Chrna3	2
Molecular function	GO:0022803	passive transmembrane transporter activity	4/40 10%	479/16737 2.86%	0.0268716	0.152041	ENSRNOG00000020557;ENSRNOG00000029811;ENSRNOG00000004535;ENSRNOG00000013829	Ryr1;Kcne2;Kcng3;Chrna3	4	ENSRNOG00000020557;ENSRNOG00000004535	Ryr1;Kcng3	2	ENSRNOG00000029811;ENSRNOG00000013829	Kcne2;Chrna3	2
Biological process	GO:0006813	potassium ion transport	3/44 6.82%	269/18048 1.49%	0.0276785	0.206554	ENSRNOG00000029811;ENSRNOG00000004535;ENSRNOG00000015567	Kcne2;Kcng3;Slc9a2	3	ENSRNOG00000004535;ENSRNOG00000015567	Kcng3;Slc9a2	2	ENSRNOG00000029811	Kcne2	1
Biological process	GO:0006816	calcium ion transport	4/44 9.09%	473/18048 2.62%	0.0277005	0.206554	ENSRNOG00000005108;ENSRNOG00000012609;ENSRNOG00000020557;ENSRNOG00000029811	Wfs1;Trdn;Ryr1;Kcne2	4	ENSRNOG00000005108;ENSRNOG00000012609;ENSRNOG00000020557	Wfs1;Trdn;Ryr1	3	ENSRNOG00000029811	Kcne2	1
Biological process	GO:0007229	integrin-mediated signaling pathway	2/44 4.55%	107/18048 0.59%	0.0280229	0.206554	ENSRNOG00000014288;ENSRNOG00000004516	Fn1;Itgbl1	2	ENSRNOG00000014288;ENSRNOG00000004516	Fn1;Itgbl1	2	--	--	0
Molecular function	GO:0004954	prostanoid receptor activity	1/40 2.5%	12/16737 0.07%	0.0283142	0.152041	ENSRNOG00000046468	Ptgfr	1	ENSRNOG00000046468	Ptgfr	1	--	--	0
Molecular function	GO:0015386	potassium:proton antiporter activity	1/40 2.5%	12/16737 0.07%	0.0283142	0.152041	ENSRNOG00000015567	Slc9a2	1	ENSRNOG00000015567	Slc9a2	1	--	--	0
Molecular function	GO:0042166	acetylcholine binding	1/40 2.5%	12/16737 0.07%	0.0283142	0.152041	ENSRNOG00000013829	Chrna3	1	--	--	0	ENSRNOG00000013829	Chrna3	1
Biological process	GO:0003337	mesenchymal to epithelial transition involved in metanephros morphogenesis	1/44 2.27%	12/18048 0.07%	0.0288749	0.206554	ENSRNOG00000068029	Six2	1	ENSRNOG00000068029	Six2	1	--	--	0
Biological process	GO:0010649	regulation of cell communication by electrical coupling	1/44 2.27%	12/18048 0.07%	0.0288749	0.206554	ENSRNOG00000012609	Trdn	1	ENSRNOG00000012609	Trdn	1	--	--	0
Biological process	GO:0032342	aldosterone biosynthetic process	1/44 2.27%	12/18048 0.07%	0.0288749	0.206554	ENSRNOG00000010917	Bmp5	1	ENSRNOG00000010917	Bmp5	1	--	--	0
Biological process	GO:0032353	negative regulation of hormone biosynthetic process	1/44 2.27%	12/18048 0.07%	0.0288749	0.206554	ENSRNOG00000010917	Bmp5	1	ENSRNOG00000010917	Bmp5	1	--	--	0
Biological process	GO:0033632	regulation of cell-cell adhesion mediated by integrin	1/44 2.27%	12/18048 0.07%	0.0288749	0.206554	ENSRNOG00000023881	Skap1	1	ENSRNOG00000023881	Skap1	1	--	--	0
Biological process	GO:0060623	regulation of chromosome condensation	1/44 2.27%	12/18048 0.07%	0.0288749	0.206554	ENSRNOG00000012051	Ncaph	1	--	--	0	ENSRNOG00000012051	Ncaph	1
Biological process	GO:0071313	cellular response to caffeine	1/44 2.27%	12/18048 0.07%	0.0288749	0.206554	ENSRNOG00000020557	Ryr1	1	ENSRNOG00000020557	Ryr1	1	--	--	0
Biological process	GO:0072017	distal tubule development	1/44 2.27%	12/18048 0.07%	0.0288749	0.206554	ENSRNOG00000011823	Tfap2b	1	ENSRNOG00000011823	Tfap2b	1	--	--	0
Biological process	GO:0072182	regulation of nephron tubule epithelial cell differentiation	1/44 2.27%	12/18048 0.07%	0.0288749	0.206554	ENSRNOG00000004210	Osr1	1	ENSRNOG00000004210	Osr1	1	--	--	0
Biological process	GO:1904238	pericyte cell differentiation	1/44 2.27%	12/18048 0.07%	0.0288749	0.206554	ENSRNOG00000004210	Osr1	1	ENSRNOG00000004210	Osr1	1	--	--	0
Biological process	GO:1904427	positive regulation of calcium ion transmembrane transport	2/44 4.55%	110/18048 0.61%	0.0294885	0.206554	ENSRNOG00000012609;ENSRNOG00000029811	Trdn;Kcne2	2	ENSRNOG00000012609	Trdn	1	ENSRNOG00000029811	Kcne2	1
Biological process	GO:1901215	negative regulation of neuron death	3/44 6.82%	276/18048 1.53%	0.029557	0.206554	ENSRNOG00000005108;ENSRNOG00000007250;ENSRNOG00000011823	Wfs1;Six4;Tfap2b	3	ENSRNOG00000005108;ENSRNOG00000011823	Wfs1;Tfap2b	2	ENSRNOG00000007250	Six4	1
Cellular component	GO:0009897	external side of plasma membrane	4/46 8.7%	468/18303 2.56%	0.0295849	0.137363	ENSRNOG00000010253;ENSRNOG00000030522;ENSRNOG00000059890;ENSRNOG00000017510	Cd163;LOC500331;Clec2d2;Mfge8	4	ENSRNOG00000010253;ENSRNOG00000059890;ENSRNOG00000017510	Cd163;Clec2d2;Mfge8	3	ENSRNOG00000030522	LOC500331	1
Cellular component	GO:0001527	microfibril	1/46 2.17%	12/18303 0.07%	0.0297544	0.137363	ENSRNOG00000053753	Thsd4	1	ENSRNOG00000053753	Thsd4	1	--	--	0
Cellular component	GO:0042101	T cell receptor complex	1/46 2.17%	12/18303 0.07%	0.0297544	0.137363	ENSRNOG00000023881	Skap1	1	ENSRNOG00000023881	Skap1	1	--	--	0
Biological process	GO:0030004	cellular monovalent inorganic cation homeostasis	2/44 4.55%	112/18048 0.62%	0.0304824	0.206554	ENSRNOG00000015567;ENSRNOG00000011823	Slc9a2;Tfap2b	2	ENSRNOG00000015567;ENSRNOG00000011823	Slc9a2;Tfap2b	2	--	--	0
Biological process	GO:0010959	regulation of metal ion transport	4/44 9.09%	488/18048 2.7%	0.0305873	0.206554	ENSRNOG00000005108;ENSRNOG00000012609;ENSRNOG00000029811;ENSRNOG00000004210	Wfs1;Trdn;Kcne2;Osr1	4	ENSRNOG00000005108;ENSRNOG00000012609;ENSRNOG00000004210	Wfs1;Trdn;Osr1	3	ENSRNOG00000029811	Kcne2	1
Molecular function	GO:0005542	folic acid binding	1/40 2.5%	13/16737 0.08%	0.0306381	0.152041	ENSRNOG00000001261	Ftcd	1	--	--	0	ENSRNOG00000001261	Ftcd	1
Molecular function	GO:0015651	quaternary ammonium group transmembrane transporter activity	1/40 2.5%	13/16737 0.08%	0.0306381	0.152041	ENSRNOG00000068642	Slc6a20a	1	ENSRNOG00000068642	Slc6a20a	1	--	--	0
Molecular function	GO:0016840	carbon-nitrogen lyase activity	1/40 2.5%	13/16737 0.08%	0.0306381	0.152041	ENSRNOG00000001261	Ftcd	1	--	--	0	ENSRNOG00000001261	Ftcd	1
Molecular function	GO:0086008	voltage-gated potassium channel activity involved in cardiac muscle cell action potential repolarization	1/40 2.5%	13/16737 0.08%	0.0306381	0.152041	ENSRNOG00000029811	Kcne2	1	--	--	0	ENSRNOG00000029811	Kcne2	1
Biological process	GO:0006705	mineralocorticoid biosynthetic process	1/44 2.27%	13/18048 0.07%	0.031244	0.206554	ENSRNOG00000010917	Bmp5	1	ENSRNOG00000010917	Bmp5	1	--	--	0
Biological process	GO:0007379	segment specification	1/44 2.27%	13/18048 0.07%	0.031244	0.206554	ENSRNOG00000004210	Osr1	1	ENSRNOG00000004210	Osr1	1	--	--	0
Biological process	GO:0007501	mesodermal cell fate specification	1/44 2.27%	13/18048 0.07%	0.031244	0.206554	ENSRNOG00000068029	Six2	1	ENSRNOG00000068029	Six2	1	--	--	0
Biological process	GO:0015816	glycine transport	1/44 2.27%	13/18048 0.07%	0.031244	0.206554	ENSRNOG00000068642	Slc6a20a	1	ENSRNOG00000068642	Slc6a20a	1	--	--	0
Biological process	GO:0033625	positive regulation of integrin activation	1/44 2.27%	13/18048 0.07%	0.031244	0.206554	ENSRNOG00000023881	Skap1	1	ENSRNOG00000023881	Skap1	1	--	--	0
Biological process	GO:0034650	cortisol metabolic process	1/44 2.27%	13/18048 0.07%	0.031244	0.206554	ENSRNOG00000010917	Bmp5	1	ENSRNOG00000010917	Bmp5	1	--	--	0
Biological process	GO:0048251	elastic fiber assembly	1/44 2.27%	13/18048 0.07%	0.031244	0.206554	ENSRNOG00000053753	Thsd4	1	ENSRNOG00000053753	Thsd4	1	--	--	0
Biological process	GO:0060272	embryonic skeletal joint morphogenesis	1/44 2.27%	13/18048 0.07%	0.031244	0.206554	ENSRNOG00000004210	Osr1	1	ENSRNOG00000004210	Osr1	1	--	--	0
Biological process	GO:0072177	mesonephric duct development	1/44 2.27%	13/18048 0.07%	0.031244	0.206554	ENSRNOG00000004210	Osr1	1	ENSRNOG00000004210	Osr1	1	--	--	0
Biological process	GO:1903867	extraembryonic membrane development	1/44 2.27%	13/18048 0.07%	0.031244	0.206554	ENSRNOG00000010917	Bmp5	1	ENSRNOG00000010917	Bmp5	1	--	--	0
Molecular function	GO:0050839	cell adhesion molecule binding	3/40 7.5%	290/16737 1.73%	0.0317445	0.152041	ENSRNOG00000014288;ENSRNOG00000004516;ENSRNOG00000017510	Fn1;Itgbl1;Mfge8	3	ENSRNOG00000014288;ENSRNOG00000004516;ENSRNOG00000017510	Fn1;Itgbl1;Mfge8	3	--	--	0
Cellular component	GO:0033162	melanosome membrane	1/46 2.17%	13/18303 0.07%	0.0321945	0.137363	ENSRNOG00000014465	Oca2	1	--	--	0	ENSRNOG00000014465	Oca2	1
Cellular component	GO:0045009	chitosome	1/46 2.17%	13/18303 0.07%	0.0321945	0.137363	ENSRNOG00000014465	Oca2	1	--	--	0	ENSRNOG00000014465	Oca2	1
Cellular component	GO:0090741	pigment granule membrane	1/46 2.17%	13/18303 0.07%	0.0321945	0.137363	ENSRNOG00000014465	Oca2	1	--	--	0	ENSRNOG00000014465	Oca2	1
Molecular function	GO:0008474	palmitoyl-(protein) hydrolase activity	1/40 2.5%	14/16737 0.08%	0.0329566	0.152041	ENSRNOG00000026855	Abhd12b	1	--	--	0	ENSRNOG00000026855	Abhd12b	1
Molecular function	GO:0019215	intermediate filament binding	1/40 2.5%	14/16737 0.08%	0.0329566	0.152041	ENSRNOG00000001261	Ftcd	1	--	--	0	ENSRNOG00000001261	Ftcd	1
Molecular function	GO:0047372	acylglycerol lipase activity	1/40 2.5%	14/16737 0.08%	0.0329566	0.152041	ENSRNOG00000026855	Abhd12b	1	--	--	0	ENSRNOG00000026855	Abhd12b	1
Molecular function	GO:0098599	palmitoyl hydrolase activity	1/40 2.5%	14/16737 0.08%	0.0329566	0.152041	ENSRNOG00000026855	Abhd12b	1	--	--	0	ENSRNOG00000026855	Abhd12b	1
Biological process	GO:0032351	negative regulation of hormone metabolic process	1/44 2.27%	14/18048 0.08%	0.0336075	0.206554	ENSRNOG00000010917	Bmp5	1	ENSRNOG00000010917	Bmp5	1	--	--	0
Biological process	GO:0043587	tongue morphogenesis	1/44 2.27%	14/18048 0.08%	0.0336075	0.206554	ENSRNOG00000007250	Six4	1	--	--	0	ENSRNOG00000007250	Six4	1
Biological process	GO:0046462	monoacylglycerol metabolic process	1/44 2.27%	14/18048 0.08%	0.0336075	0.206554	ENSRNOG00000026855	Abhd12b	1	--	--	0	ENSRNOG00000026855	Abhd12b	1
Biological process	GO:0072160	nephron tubule epithelial cell differentiation	1/44 2.27%	14/18048 0.08%	0.0336075	0.206554	ENSRNOG00000004210	Osr1	1	ENSRNOG00000004210	Osr1	1	--	--	0
Biological process	GO:0090158	endoplasmic reticulum membrane organization	1/44 2.27%	14/18048 0.08%	0.0336075	0.206554	ENSRNOG00000012609	Trdn	1	ENSRNOG00000012609	Trdn	1	--	--	0
Biological process	GO:0098734	macromolecule depalmitoylation	1/44 2.27%	14/18048 0.08%	0.0336075	0.206554	ENSRNOG00000026855	Abhd12b	1	--	--	0	ENSRNOG00000026855	Abhd12b	1
Biological process	GO:2000674	regulation of type B pancreatic cell apoptotic process	1/44 2.27%	14/18048 0.08%	0.0336075	0.206554	ENSRNOG00000005108	Wfs1	1	ENSRNOG00000005108	Wfs1	1	--	--	0
Biological process	GO:0045833	negative regulation of lipid metabolic process	2/44 4.55%	120/18048 0.66%	0.034589	0.206554	ENSRNOG00000026661;ENSRNOG00000010917	Hcar1;Bmp5	2	ENSRNOG00000026661;ENSRNOG00000010917	Hcar1;Bmp5	2	--	--	0
Cellular component	GO:0045335	phagocytic vesicle	2/46 4.35%	117/18303 0.64%	0.0349297	0.144226	ENSRNOG00000031607;ENSRNOG00000065254	LOC120093125;RT1-CE16	2	--	--	0	ENSRNOG00000031607;ENSRNOG00000065254	LOC120093125;RT1-CE16	2
Molecular function	GO:0005344	oxygen carrier activity	1/40 2.5%	15/16737 0.09%	0.0352697	0.152041	ENSRNOG00000011719	Ngb	1	--	--	0	ENSRNOG00000011719	Ngb	1
Molecular function	GO:0005267	potassium channel activity	2/40 5%	124/16737 0.74%	0.0353628	0.152041	ENSRNOG00000029811;ENSRNOG00000004535	Kcne2;Kcng3	2	ENSRNOG00000004535	Kcng3	1	ENSRNOG00000029811	Kcne2	1
Biological process	GO:0032222	regulation of synaptic transmission, cholinergic	1/44 2.27%	15/18048 0.08%	0.0359653	0.206554	ENSRNOG00000013829	Chrna3	1	--	--	0	ENSRNOG00000013829	Chrna3	1
Biological process	GO:0032341	aldosterone metabolic process	1/44 2.27%	15/18048 0.08%	0.0359653	0.206554	ENSRNOG00000010917	Bmp5	1	ENSRNOG00000010917	Bmp5	1	--	--	0
Biological process	GO:0034116	positive regulation of heterotypic cell-cell adhesion	1/44 2.27%	15/18048 0.08%	0.0359653	0.206554	ENSRNOG00000023881	Skap1	1	ENSRNOG00000023881	Skap1	1	--	--	0
Biological process	GO:0034309	primary alcohol biosynthetic process	1/44 2.27%	15/18048 0.08%	0.0359653	0.206554	ENSRNOG00000010917	Bmp5	1	ENSRNOG00000010917	Bmp5	1	--	--	0
Biological process	GO:0042048	olfactory behavior	1/44 2.27%	15/18048 0.08%	0.0359653	0.206554	ENSRNOG00000005108	Wfs1	1	ENSRNOG00000005108	Wfs1	1	--	--	0
Biological process	GO:0043584	nose development	1/44 2.27%	15/18048 0.08%	0.0359653	0.206554	ENSRNOG00000007250	Six4	1	--	--	0	ENSRNOG00000007250	Six4	1
Biological process	GO:0045792	negative regulation of cell size	1/44 2.27%	15/18048 0.08%	0.0359653	0.206554	ENSRNOG00000013793	C1qtnf9	1	--	--	0	ENSRNOG00000013793	C1qtnf9	1
Biological process	GO:0051451	myoblast migration	1/44 2.27%	15/18048 0.08%	0.0359653	0.206554	ENSRNOG00000007250	Six4	1	--	--	0	ENSRNOG00000007250	Six4	1
Biological process	GO:0060073	micturition	1/44 2.27%	15/18048 0.08%	0.0359653	0.206554	ENSRNOG00000013829	Chrna3	1	--	--	0	ENSRNOG00000013829	Chrna3	1
Biological process	GO:0071635	negative regulation of transforming growth factor beta production	1/44 2.27%	15/18048 0.08%	0.0359653	0.206554	ENSRNOG00000014288	Fn1	1	ENSRNOG00000014288	Fn1	1	--	--	0
Biological process	GO:0072178	nephric duct morphogenesis	1/44 2.27%	15/18048 0.08%	0.0359653	0.206554	ENSRNOG00000004210	Osr1	1	ENSRNOG00000004210	Osr1	1	--	--	0
Biological process	GO:0072283	metanephric renal vesicle morphogenesis	1/44 2.27%	15/18048 0.08%	0.0359653	0.206554	ENSRNOG00000068029	Six2	1	ENSRNOG00000068029	Six2	1	--	--	0
Biological process	GO:1900102	negative regulation of endoplasmic reticulum unfolded protein response	1/44 2.27%	15/18048 0.08%	0.0359653	0.206554	ENSRNOG00000005108	Wfs1	1	ENSRNOG00000005108	Wfs1	1	--	--	0
Biological process	GO:1901387	positive regulation of voltage-gated calcium channel activity	1/44 2.27%	15/18048 0.08%	0.0359653	0.206554	ENSRNOG00000029811	Kcne2	1	--	--	0	ENSRNOG00000029811	Kcne2	1
Biological process	GO:1902260	negative regulation of delayed rectifier potassium channel activity	1/44 2.27%	15/18048 0.08%	0.0359653	0.206554	ENSRNOG00000029811	Kcne2	1	--	--	0	ENSRNOG00000029811	Kcne2	1
Biological process	GO:1902931	negative regulation of alcohol biosynthetic process	1/44 2.27%	15/18048 0.08%	0.0359653	0.206554	ENSRNOG00000010917	Bmp5	1	ENSRNOG00000010917	Bmp5	1	--	--	0
Biological process	GO:0032410	negative regulation of transporter activity	2/44 4.55%	124/18048 0.69%	0.036719	0.206554	ENSRNOG00000029811;ENSRNOG00000004210	Kcne2;Osr1	2	ENSRNOG00000004210	Osr1	1	ENSRNOG00000029811	Kcne2	1
Biological process	GO:0043523	regulation of neuron apoptotic process	3/44 6.82%	301/18048 1.67%	0.0368067	0.206554	ENSRNOG00000005108;ENSRNOG00000007250;ENSRNOG00000011823	Wfs1;Six4;Tfap2b	3	ENSRNOG00000005108;ENSRNOG00000011823	Wfs1;Tfap2b	2	ENSRNOG00000007250	Six4	1
Biological process	GO:0098659	inorganic cation import across plasma membrane	2/44 4.55%	125/18048 0.69%	0.0372592	0.206554	ENSRNOG00000029811;ENSRNOG00000015567	Kcne2;Slc9a2	2	ENSRNOG00000015567	Slc9a2	1	ENSRNOG00000029811	Kcne2	1
Biological process	GO:0099587	inorganic ion import across plasma membrane	2/44 4.55%	125/18048 0.69%	0.0372592	0.206554	ENSRNOG00000029811;ENSRNOG00000015567	Kcne2;Slc9a2	2	ENSRNOG00000015567	Slc9a2	1	ENSRNOG00000029811	Kcne2	1
Molecular function	GO:0004953	icosanoid receptor activity	1/40 2.5%	16/16737 0.1%	0.0375774	0.152041	ENSRNOG00000046468	Ptgfr	1	ENSRNOG00000046468	Ptgfr	1	--	--	0
Molecular function	GO:0015278	calcium-release channel activity	1/40 2.5%	16/16737 0.1%	0.0375774	0.152041	ENSRNOG00000020557	Ryr1	1	ENSRNOG00000020557	Ryr1	1	--	--	0
Molecular function	GO:0016646	oxidoreductase activity, acting on the CH-NH group of donors, NAD or NADP as acceptor	1/40 2.5%	16/16737 0.1%	0.0375774	0.152041	ENSRNOG00000061215	Crym	1	ENSRNOG00000061215	Crym	1	--	--	0
Molecular function	GO:0022848	acetylcholine-gated cation-selective channel activity	1/40 2.5%	16/16737 0.1%	0.0375774	0.152041	ENSRNOG00000013829	Chrna3	1	--	--	0	ENSRNOG00000013829	Chrna3	1
Molecular function	GO:0051139	metal cation:proton antiporter activity	1/40 2.5%	16/16737 0.1%	0.0375774	0.152041	ENSRNOG00000015567	Slc9a2	1	ENSRNOG00000015567	Slc9a2	1	--	--	0
Molecular function	GO:0070700	BMP receptor binding	1/40 2.5%	16/16737 0.1%	0.0375774	0.152041	ENSRNOG00000010917	Bmp5	1	ENSRNOG00000010917	Bmp5	1	--	--	0
Biological process	GO:0002062	chondrocyte differentiation	2/44 4.55%	126/18048 0.7%	0.0378026	0.206554	ENSRNOG00000068029;ENSRNOG00000004210	Six2;Osr1	2	ENSRNOG00000068029;ENSRNOG00000004210	Six2;Osr1	2	--	--	0
Biological process	GO:0032412	regulation of ion transmembrane transporter activity	3/44 6.82%	305/18048 1.69%	0.0380445	0.206554	ENSRNOG00000012609;ENSRNOG00000029811;ENSRNOG00000004210	Trdn;Kcne2;Osr1	3	ENSRNOG00000012609;ENSRNOG00000004210	Trdn;Osr1	2	ENSRNOG00000029811	Kcne2	1
Biological process	GO:0015671	oxygen transport	1/44 2.27%	16/18048 0.09%	0.0383176	0.206554	ENSRNOG00000011719	Ngb	1	--	--	0	ENSRNOG00000011719	Ngb	1
Biological process	GO:0015697	quaternary ammonium group transport	1/44 2.27%	16/18048 0.09%	0.0383176	0.206554	ENSRNOG00000068642	Slc6a20a	1	ENSRNOG00000068642	Slc6a20a	1	--	--	0
Biological process	GO:0035810	positive regulation of urine volume	1/44 2.27%	16/18048 0.09%	0.0383176	0.206554	ENSRNOG00000011823	Tfap2b	1	ENSRNOG00000011823	Tfap2b	1	--	--	0
Biological process	GO:0051280	negative regulation of release of sequestered calcium ion into cytosol	1/44 2.27%	16/18048 0.09%	0.0383176	0.206554	ENSRNOG00000012609	Trdn	1	ENSRNOG00000012609	Trdn	1	--	--	0
Biological process	GO:0060788	ectodermal placode formation	1/44 2.27%	16/18048 0.09%	0.0383176	0.206554	ENSRNOG00000007250	Six4	1	--	--	0	ENSRNOG00000007250	Six4	1
Biological process	GO:0071318	cellular response to ATP	1/44 2.27%	16/18048 0.09%	0.0383176	0.206554	ENSRNOG00000020557	Ryr1	1	ENSRNOG00000020557	Ryr1	1	--	--	0
Biological process	GO:0071415	cellular response to purine-containing compound	1/44 2.27%	16/18048 0.09%	0.0383176	0.206554	ENSRNOG00000020557	Ryr1	1	ENSRNOG00000020557	Ryr1	1	--	--	0
Biological process	GO:0071697	ectodermal placode morphogenesis	1/44 2.27%	16/18048 0.09%	0.0383176	0.206554	ENSRNOG00000007250	Six4	1	--	--	0	ENSRNOG00000007250	Six4	1
Biological process	GO:0072498	embryonic skeletal joint development	1/44 2.27%	16/18048 0.09%	0.0383176	0.206554	ENSRNOG00000004210	Osr1	1	ENSRNOG00000004210	Osr1	1	--	--	0
Biological process	GO:0006874	cellular calcium ion homeostasis	3/44 6.82%	308/18048 1.71%	0.0389868	0.206554	ENSRNOG00000005108;ENSRNOG00000012609;ENSRNOG00000020557	Wfs1;Trdn;Ryr1	3	ENSRNOG00000005108;ENSRNOG00000012609;ENSRNOG00000020557	Wfs1;Trdn;Ryr1	3	--	--	0
Biological process	GO:0018958	phenol-containing compound metabolic process	2/44 4.55%	129/18048 0.71%	0.039451	0.206554	ENSRNOG00000061215;ENSRNOG00000014465	Crym;Oca2	2	ENSRNOG00000061215	Crym	1	ENSRNOG00000014465	Oca2	1
Cellular component	GO:0005892	acetylcholine-gated channel complex	1/46 2.17%	16/18303 0.09%	0.0394787	0.148626	ENSRNOG00000013829	Chrna3	1	--	--	0	ENSRNOG00000013829	Chrna3	1
Cellular component	GO:0098691	dopaminergic synapse	1/46 2.17%	16/18303 0.09%	0.0394787	0.148626	ENSRNOG00000013829	Chrna3	1	--	--	0	ENSRNOG00000013829	Chrna3	1
Cellular component	GO:0098981	cholinergic synapse	1/46 2.17%	16/18303 0.09%	0.0394787	0.148626	ENSRNOG00000013829	Chrna3	1	--	--	0	ENSRNOG00000013829	Chrna3	1
Molecular function	GO:0005283	amino acid:sodium symporter activity	1/40 2.5%	17/16737 0.1%	0.0398797	0.152041	ENSRNOG00000068642	Slc6a20a	1	ENSRNOG00000068642	Slc6a20a	1	--	--	0
Molecular function	GO:0022821	solute:potassium antiporter activity	1/40 2.5%	17/16737 0.1%	0.0398797	0.152041	ENSRNOG00000015567	Slc9a2	1	ENSRNOG00000015567	Slc9a2	1	--	--	0
Molecular function	GO:0033130	acetylcholine receptor binding	1/40 2.5%	17/16737 0.1%	0.0398797	0.152041	ENSRNOG00000027157	Ly6g6e	1	--	--	0	ENSRNOG00000027157	Ly6g6e	1
Biological process	GO:0051924	regulation of calcium ion transport	3/44 6.82%	311/18048 1.72%	0.0399411	0.206554	ENSRNOG00000005108;ENSRNOG00000012609;ENSRNOG00000029811	Wfs1;Trdn;Kcne2	3	ENSRNOG00000005108;ENSRNOG00000012609	Wfs1;Trdn	2	ENSRNOG00000029811	Kcne2	1
Biological process	GO:0051209	release of sequestered calcium ion into cytosol	2/44 4.55%	130/18048 0.72%	0.0400065	0.206554	ENSRNOG00000012609;ENSRNOG00000020557	Trdn;Ryr1	2	ENSRNOG00000012609;ENSRNOG00000020557	Trdn;Ryr1	2	--	--	0
Biological process	GO:0051283	negative regulation of sequestering of calcium ion	2/44 4.55%	131/18048 0.73%	0.040565	0.206554	ENSRNOG00000012609;ENSRNOG00000020557	Trdn;Ryr1	2	ENSRNOG00000012609;ENSRNOG00000020557	Trdn;Ryr1	2	--	--	0
Biological process	GO:0007076	mitotic chromosome condensation	1/44 2.27%	17/18048 0.09%	0.0406642	0.206554	ENSRNOG00000012051	Ncaph	1	--	--	0	ENSRNOG00000012051	Ncaph	1
Biological process	GO:0008212	mineralocorticoid metabolic process	1/44 2.27%	17/18048 0.09%	0.0406642	0.206554	ENSRNOG00000010917	Bmp5	1	ENSRNOG00000010917	Bmp5	1	--	--	0
Biological process	GO:0010960	magnesium ion homeostasis	1/44 2.27%	17/18048 0.09%	0.0406642	0.206554	ENSRNOG00000011823	Tfap2b	1	ENSRNOG00000011823	Tfap2b	1	--	--	0
Biological process	GO:0019896	axonal transport of mitochondrion	1/44 2.27%	17/18048 0.09%	0.0406642	0.206554	ENSRNOG00000011923	Mgarp	1	--	--	0	ENSRNOG00000011923	Mgarp	1
Biological process	GO:0030238	male sex determination	1/44 2.27%	17/18048 0.09%	0.0406642	0.206554	ENSRNOG00000007250	Six4	1	--	--	0	ENSRNOG00000007250	Six4	1
Biological process	GO:0071696	ectodermal placode development	1/44 2.27%	17/18048 0.09%	0.0406642	0.206554	ENSRNOG00000007250	Six4	1	--	--	0	ENSRNOG00000007250	Six4	1
Biological process	GO:0072044	collecting duct development	1/44 2.27%	17/18048 0.09%	0.0406642	0.206554	ENSRNOG00000011823	Tfap2b	1	ENSRNOG00000011823	Tfap2b	1	--	--	0
Biological process	GO:0072224	metanephric glomerulus development	1/44 2.27%	17/18048 0.09%	0.0406642	0.206554	ENSRNOG00000004210	Osr1	1	ENSRNOG00000004210	Osr1	1	--	--	0
Biological process	GO:0097050	type B pancreatic cell apoptotic process	1/44 2.27%	17/18048 0.09%	0.0406642	0.206554	ENSRNOG00000005108	Wfs1	1	ENSRNOG00000005108	Wfs1	1	--	--	0
Biological process	GO:0022898	regulation of transmembrane transporter activity	3/44 6.82%	316/18048 1.75%	0.041558	0.206554	ENSRNOG00000012609;ENSRNOG00000029811;ENSRNOG00000004210	Trdn;Kcne2;Osr1	3	ENSRNOG00000012609;ENSRNOG00000004210	Trdn;Osr1	2	ENSRNOG00000029811	Kcne2	1
Biological process	GO:0007498	mesoderm development	2/44 4.55%	133/18048 0.74%	0.0416909	0.206554	ENSRNOG00000068029;ENSRNOG00000004210	Six2;Osr1	2	ENSRNOG00000068029;ENSRNOG00000004210	Six2;Osr1	2	--	--	0
Biological process	GO:0032414	positive regulation of ion transmembrane transporter activity	2/44 4.55%	133/18048 0.74%	0.0416909	0.206554	ENSRNOG00000012609;ENSRNOG00000029811	Trdn;Kcne2	2	ENSRNOG00000012609	Trdn	1	ENSRNOG00000029811	Kcne2	1
Biological process	GO:0051282	regulation of sequestering of calcium ion	2/44 4.55%	133/18048 0.74%	0.0416909	0.206554	ENSRNOG00000012609;ENSRNOG00000020557	Trdn;Ryr1	2	ENSRNOG00000012609;ENSRNOG00000020557	Trdn;Ryr1	2	--	--	0
Biological process	GO:2000027	regulation of animal organ morphogenesis	2/44 4.55%	133/18048 0.74%	0.0416909	0.206554	ENSRNOG00000007250;ENSRNOG00000068029	Six4;Six2	2	ENSRNOG00000068029	Six2	1	ENSRNOG00000007250	Six4	1
Molecular function	GO:0015464	acetylcholine receptor activity	1/40 2.5%	18/16737 0.11%	0.0421766	0.156494	ENSRNOG00000013829	Chrna3	1	--	--	0	ENSRNOG00000013829	Chrna3	1
Biological process	GO:0051208	sequestering of calcium ion	2/44 4.55%	135/18048 0.75%	0.0428286	0.206554	ENSRNOG00000012609;ENSRNOG00000020557	Trdn;Ryr1	2	ENSRNOG00000012609;ENSRNOG00000020557	Trdn;Ryr1	2	--	--	0
Biological process	GO:0001710	mesodermal cell fate commitment	1/44 2.27%	18/18048 0.1%	0.0430052	0.206554	ENSRNOG00000068029	Six2	1	ENSRNOG00000068029	Six2	1	--	--	0
Biological process	GO:0006704	glucocorticoid biosynthetic process	1/44 2.27%	18/18048 0.1%	0.0430052	0.206554	ENSRNOG00000010917	Bmp5	1	ENSRNOG00000010917	Bmp5	1	--	--	0
Biological process	GO:0051284	positive regulation of sequestering of calcium ion	1/44 2.27%	18/18048 0.1%	0.0430052	0.206554	ENSRNOG00000012609	Trdn	1	ENSRNOG00000012609	Trdn	1	--	--	0
Biological process	GO:0071380	cellular response to prostaglandin E stimulus	1/44 2.27%	18/18048 0.1%	0.0430052	0.206554	ENSRNOG00000014288	Fn1	1	ENSRNOG00000014288	Fn1	1	--	--	0
Biological process	GO:0072077	renal vesicle morphogenesis	1/44 2.27%	18/18048 0.1%	0.0430052	0.206554	ENSRNOG00000068029	Six2	1	ENSRNOG00000068029	Six2	1	--	--	0
Biological process	GO:2000650	negative regulation of sodium ion transmembrane transporter activity	1/44 2.27%	18/18048 0.1%	0.0430052	0.206554	ENSRNOG00000004210	Osr1	1	ENSRNOG00000004210	Osr1	1	--	--	0
Biological process	GO:2000696	regulation of epithelial cell differentiation involved in kidney development	1/44 2.27%	18/18048 0.1%	0.0430052	0.206554	ENSRNOG00000004210	Osr1	1	ENSRNOG00000004210	Osr1	1	--	--	0
Biological process	GO:0001704	formation of primary germ layer	2/44 4.55%	137/18048 0.76%	0.0439779	0.206554	ENSRNOG00000014288;ENSRNOG00000068029	Fn1;Six2	2	ENSRNOG00000014288;ENSRNOG00000068029	Fn1;Six2	2	--	--	0
Molecular function	GO:0030548	acetylcholine receptor regulator activity	1/40 2.5%	19/16737 0.11%	0.0444682	0.156494	ENSRNOG00000027157	Ly6g6e	1	--	--	0	ENSRNOG00000027157	Ly6g6e	1
Molecular function	GO:0070628	proteasome binding	1/40 2.5%	19/16737 0.11%	0.0444682	0.156494	ENSRNOG00000005108	Wfs1	1	ENSRNOG00000005108	Wfs1	1	--	--	0
Molecular function	GO:0099602	neurotransmitter receptor regulator activity	1/40 2.5%	19/16737 0.11%	0.0444682	0.156494	ENSRNOG00000027157	Ly6g6e	1	--	--	0	ENSRNOG00000027157	Ly6g6e	1
Biological process	GO:0016358	dendrite development	3/44 6.82%	326/18048 1.81%	0.0448905	0.206554	ENSRNOG00000011923;ENSRNOG00000010917;ENSRNOG00000013829	Mgarp;Bmp5;Chrna3	3	ENSRNOG00000010917	Bmp5	1	ENSRNOG00000011923;ENSRNOG00000013829	Mgarp;Chrna3	2
Biological process	GO:0008277	regulation of G protein-coupled receptor signaling pathway	2/44 4.55%	139/18048 0.77%	0.0451387	0.206554	ENSRNOG00000027157;ENSRNOG00000030568	Ly6g6e;Rgs12	2	ENSRNOG00000030568	Rgs12	1	ENSRNOG00000027157	Ly6g6e	1
Biological process	GO:0010470	regulation of gastrulation	1/44 2.27%	19/18048 0.11%	0.0453406	0.206554	ENSRNOG00000004210	Osr1	1	ENSRNOG00000004210	Osr1	1	--	--	0
Biological process	GO:0033623	regulation of integrin activation	1/44 2.27%	19/18048 0.11%	0.0453406	0.206554	ENSRNOG00000023881	Skap1	1	ENSRNOG00000023881	Skap1	1	--	--	0
Biological process	GO:0033631	cell-cell adhesion mediated by integrin	1/44 2.27%	19/18048 0.11%	0.0453406	0.206554	ENSRNOG00000023881	Skap1	1	ENSRNOG00000023881	Skap1	1	--	--	0
Biological process	GO:0046184	aldehyde biosynthetic process	1/44 2.27%	19/18048 0.11%	0.0453406	0.206554	ENSRNOG00000010917	Bmp5	1	ENSRNOG00000010917	Bmp5	1	--	--	0
Biological process	GO:0072176	nephric duct development	1/44 2.27%	19/18048 0.11%	0.0453406	0.206554	ENSRNOG00000004210	Osr1	1	ENSRNOG00000004210	Osr1	1	--	--	0
Biological process	GO:0072378	blood coagulation, fibrin clot formation	1/44 2.27%	19/18048 0.11%	0.0453406	0.206554	ENSRNOG00000014288	Fn1	1	ENSRNOG00000014288	Fn1	1	--	--	0
Biological process	GO:1902306	negative regulation of sodium ion transmembrane transport	1/44 2.27%	19/18048 0.11%	0.0453406	0.206554	ENSRNOG00000004210	Osr1	1	ENSRNOG00000004210	Osr1	1	--	--	0
Cellular component	GO:0044853	plasma membrane raft	2/46 4.35%	136/18303 0.74%	0.0458627	0.167726	ENSRNOG00000013829;ENSRNOG00000023881	Chrna3;Skap1	2	ENSRNOG00000023881	Skap1	1	ENSRNOG00000013829	Chrna3	1
Biological process	GO:0006936	muscle contraction	3/44 6.82%	330/18048 1.83%	0.0462601	0.206554	ENSRNOG00000020557;ENSRNOG00000029811;ENSRNOG00000013829	Ryr1;Kcne2;Chrna3	3	ENSRNOG00000020557	Ryr1	1	ENSRNOG00000029811;ENSRNOG00000013829	Kcne2;Chrna3	2
Biological process	GO:0030278	regulation of ossification	2/44 4.55%	141/18048 0.78%	0.0463109	0.206554	ENSRNOG00000068029;ENSRNOG00000004210	Six2;Osr1	2	ENSRNOG00000068029;ENSRNOG00000004210	Six2;Osr1	2	--	--	0
Biological process	GO:0032411	positive regulation of transporter activity	2/44 4.55%	141/18048 0.78%	0.0463109	0.206554	ENSRNOG00000012609;ENSRNOG00000029811	Trdn;Kcne2	2	ENSRNOG00000012609	Trdn	1	ENSRNOG00000029811	Kcne2	1
Biological process	GO:0048562	embryonic organ morphogenesis	3/44 6.82%	333/18048 1.85%	0.0473009	0.206554	ENSRNOG00000007250;ENSRNOG00000068029;ENSRNOG00000004210	Six4;Six2;Osr1	3	ENSRNOG00000068029;ENSRNOG00000004210	Six2;Osr1	2	ENSRNOG00000007250	Six4	1
Biological process	GO:0007171	activation of transmembrane receptor protein tyrosine kinase activity	1/44 2.27%	20/18048 0.11%	0.0476705	0.206554	ENSRNOG00000013829	Chrna3	1	--	--	0	ENSRNOG00000013829	Chrna3	1
Biological process	GO:0010644	cell communication by electrical coupling	1/44 2.27%	20/18048 0.11%	0.0476705	0.206554	ENSRNOG00000012609	Trdn	1	ENSRNOG00000012609	Trdn	1	--	--	0
Biological process	GO:0048557	embryonic digestive tract morphogenesis	1/44 2.27%	20/18048 0.11%	0.0476705	0.206554	ENSRNOG00000068029	Six2	1	ENSRNOG00000068029	Six2	1	--	--	0
Biological process	GO:0060231	mesenchymal to epithelial transition	1/44 2.27%	20/18048 0.11%	0.0476705	0.206554	ENSRNOG00000068029	Six2	1	ENSRNOG00000068029	Six2	1	--	--	0
Biological process	GO:0072189	ureter development	1/44 2.27%	20/18048 0.11%	0.0476705	0.206554	ENSRNOG00000004210	Osr1	1	ENSRNOG00000004210	Osr1	1	--	--	0
Biological process	GO:0072234	metanephric nephron tubule development	1/44 2.27%	20/18048 0.11%	0.0476705	0.206554	ENSRNOG00000004210	Osr1	1	ENSRNOG00000004210	Osr1	1	--	--	0
Biological process	GO:0086013	membrane repolarization during cardiac muscle cell action potential	1/44 2.27%	20/18048 0.11%	0.0476705	0.206554	ENSRNOG00000029811	Kcne2	1	--	--	0	ENSRNOG00000029811	Kcne2	1
Biological process	GO:0090030	regulation of steroid hormone biosynthetic process	1/44 2.27%	20/18048 0.11%	0.0476705	0.206554	ENSRNOG00000010917	Bmp5	1	ENSRNOG00000010917	Bmp5	1	--	--	0
Biological process	GO:0097623	potassium ion export across plasma membrane	1/44 2.27%	20/18048 0.11%	0.0476705	0.206554	ENSRNOG00000029811	Kcne2	1	--	--	0	ENSRNOG00000029811	Kcne2	1
Biological process	GO:0007601	visual perception	2/44 4.55%	144/18048 0.8%	0.0480902	0.206554	ENSRNOG00000005108;ENSRNOG00000011719	Wfs1;Ngb	2	ENSRNOG00000005108	Wfs1	1	ENSRNOG00000011719	Ngb	1
Molecular function	GO:0015081	sodium ion transmembrane transporter activity	2/40 5%	148/16737 0.88%	0.0486773	0.158151	ENSRNOG00000068642;ENSRNOG00000015567	Slc6a20a;Slc9a2	2	ENSRNOG00000068642;ENSRNOG00000015567	Slc6a20a;Slc9a2	2	--	--	0
Biological process	GO:0072503	cellular divalent inorganic cation homeostasis	3/44 6.82%	337/18048 1.87%	0.0487068	0.206554	ENSRNOG00000005108;ENSRNOG00000012609;ENSRNOG00000020557	Wfs1;Trdn;Ryr1	3	ENSRNOG00000005108;ENSRNOG00000012609;ENSRNOG00000020557	Wfs1;Trdn;Ryr1	3	--	--	0
Molecular function	GO:0004622	lysophospholipase activity	1/40 2.5%	21/16737 0.13%	0.0490353	0.158151	ENSRNOG00000026855	Abhd12b	1	--	--	0	ENSRNOG00000026855	Abhd12b	1
Molecular function	GO:0043177	organic acid binding	2/40 5%	149/16737 0.89%	0.0492665	0.158151	ENSRNOG00000001261;ENSRNOG00000003620	Ftcd;Fmo3	2	ENSRNOG00000003620	Fmo3	1	ENSRNOG00000001261	Ftcd	1
Biological process	GO:0006658	phosphatidylserine metabolic process	1/44 2.27%	21/18048 0.12%	0.0499948	0.206554	ENSRNOG00000026855	Abhd12b	1	--	--	0	ENSRNOG00000026855	Abhd12b	1
Biological process	GO:0032966	negative regulation of collagen biosynthetic process	1/44 2.27%	21/18048 0.12%	0.0499948	0.206554	ENSRNOG00000014288	Fn1	1	ENSRNOG00000014288	Fn1	1	--	--	0
Biological process	GO:0035584	calcium-mediated signaling using intracellular calcium source	1/44 2.27%	21/18048 0.12%	0.0499948	0.206554	ENSRNOG00000046468	Ptgfr	1	ENSRNOG00000046468	Ptgfr	1	--	--	0
Biological process	GO:0060039	pericardium development	1/44 2.27%	21/18048 0.12%	0.0499948	0.206554	ENSRNOG00000010917	Bmp5	1	ENSRNOG00000010917	Bmp5	1	--	--	0
Biological process	GO:0060314	regulation of ryanodine-sensitive calcium-release channel activity	1/44 2.27%	21/18048 0.12%	0.0499948	0.206554	ENSRNOG00000012609	Trdn	1	ENSRNOG00000012609	Trdn	1	--	--	0
Biological process	GO:0061548	ganglion development	1/44 2.27%	21/18048 0.12%	0.0499948	0.206554	ENSRNOG00000007250	Six4	1	--	--	0	ENSRNOG00000007250	Six4	1
Molecular function	GO:0044325	transmembrane transporter binding	2/40 5%	151/16737 0.9%	0.0504529	0.158151	ENSRNOG00000012609;ENSRNOG00000029811	Trdn;Kcne2	2	ENSRNOG00000012609	Trdn	1	ENSRNOG00000029811	Kcne2	1
Biological process	GO:0051402	neuron apoptotic process	3/44 6.82%	342/18048 1.89%	0.0504931	0.206554	ENSRNOG00000005108;ENSRNOG00000007250;ENSRNOG00000011823	Wfs1;Six4;Tfap2b	3	ENSRNOG00000005108;ENSRNOG00000011823	Wfs1;Tfap2b	2	ENSRNOG00000007250	Six4	1
Biological process	GO:0051604	protein maturation	3/44 6.82%	342/18048 1.89%	0.0504931	0.206554	ENSRNOG00000062986;ENSRNOG00000014288;ENSRNOG00000008947	Ccbe1;Fn1;Cpz	3	ENSRNOG00000062986;ENSRNOG00000014288;ENSRNOG00000008947	Ccbe1;Fn1;Cpz	3	--	--	0
Biological process	GO:0050953	sensory perception of light stimulus	2/44 4.55%	148/18048 0.82%	0.0505012	0.206554	ENSRNOG00000005108;ENSRNOG00000011719	Wfs1;Ngb	2	ENSRNOG00000005108	Wfs1	1	ENSRNOG00000011719	Ngb	1
Biological process	GO:0010811	positive regulation of cell-substrate adhesion	2/44 4.55%	149/18048 0.83%	0.0511107	0.206554	ENSRNOG00000014288;ENSRNOG00000023881	Fn1;Skap1	2	ENSRNOG00000014288;ENSRNOG00000023881	Fn1;Skap1	2	--	--	0
Molecular function	GO:0042165	neurotransmitter binding	1/40 2.5%	22/16737 0.13%	0.0513109	0.158151	ENSRNOG00000013829	Chrna3	1	--	--	0	ENSRNOG00000013829	Chrna3	1
Molecular function	GO:0072349	modified amino acid transmembrane transporter activity	1/40 2.5%	22/16737 0.13%	0.0513109	0.158151	ENSRNOG00000068642	Slc6a20a	1	ENSRNOG00000068642	Slc6a20a	1	--	--	0
Biological process	GO:0051146	striated muscle cell differentiation	3/44 6.82%	345/18048 1.91%	0.0515802	0.206554	ENSRNOG00000012609;ENSRNOG00000007250;ENSRNOG00000020557	Trdn;Six4;Ryr1	3	ENSRNOG00000012609;ENSRNOG00000020557	Trdn;Ryr1	2	ENSRNOG00000007250	Six4	1
Cellular component	GO:0019898	extrinsic component of membrane	3/46 6.52%	335/18303 1.83%	0.0517761	0.184093	ENSRNOG00000020557;ENSRNOG00000004210;ENSRNOG00000017510	Ryr1;Osr1;Mfge8	3	ENSRNOG00000020557;ENSRNOG00000004210;ENSRNOG00000017510	Ryr1;Osr1;Mfge8	3	--	--	0
Biological process	GO:0032409	regulation of transporter activity	3/44 6.82%	347/18048 1.92%	0.0523113	0.206554	ENSRNOG00000012609;ENSRNOG00000029811;ENSRNOG00000004210	Trdn;Kcne2;Osr1	3	ENSRNOG00000012609;ENSRNOG00000004210	Trdn;Osr1	2	ENSRNOG00000029811	Kcne2	1
Biological process	GO:0007635	chemosensory behavior	1/44 2.27%	22/18048 0.12%	0.0523135	0.206554	ENSRNOG00000005108	Wfs1	1	ENSRNOG00000005108	Wfs1	1	--	--	0
Biological process	GO:0010566	regulation of ketone biosynthetic process	1/44 2.27%	22/18048 0.12%	0.0523135	0.206554	ENSRNOG00000010917	Bmp5	1	ENSRNOG00000010917	Bmp5	1	--	--	0
Biological process	GO:0010713	negative regulation of collagen metabolic process	1/44 2.27%	22/18048 0.12%	0.0523135	0.206554	ENSRNOG00000014288	Fn1	1	ENSRNOG00000014288	Fn1	1	--	--	0
Biological process	GO:0010801	negative regulation of peptidyl-threonine phosphorylation	1/44 2.27%	22/18048 0.12%	0.0523135	0.206554	ENSRNOG00000052061	Ppef2	1	--	--	0	ENSRNOG00000052061	Ppef2	1
Biological process	GO:0015669	gas transport	1/44 2.27%	22/18048 0.12%	0.0523135	0.206554	ENSRNOG00000011719	Ngb	1	--	--	0	ENSRNOG00000011719	Ngb	1
Biological process	GO:0050855	regulation of B cell receptor signaling pathway	1/44 2.27%	22/18048 0.12%	0.0523135	0.206554	ENSRNOG00000022975	Nfam1	1	ENSRNOG00000022975	Nfam1	1	--	--	0
Biological process	GO:0055062	phosphate ion homeostasis	1/44 2.27%	22/18048 0.12%	0.0523135	0.206554	ENSRNOG00000011823	Tfap2b	1	ENSRNOG00000011823	Tfap2b	1	--	--	0
Biological process	GO:0060307	regulation of ventricular cardiac muscle cell membrane repolarization	1/44 2.27%	22/18048 0.12%	0.0523135	0.206554	ENSRNOG00000029811	Kcne2	1	--	--	0	ENSRNOG00000029811	Kcne2	1
Biological process	GO:0060602	branch elongation of an epithelium	1/44 2.27%	22/18048 0.12%	0.0523135	0.206554	ENSRNOG00000007250	Six4	1	--	--	0	ENSRNOG00000007250	Six4	1
Biological process	GO:0072506	trivalent inorganic anion homeostasis	1/44 2.27%	22/18048 0.12%	0.0523135	0.206554	ENSRNOG00000011823	Tfap2b	1	ENSRNOG00000011823	Tfap2b	1	--	--	0
Biological process	GO:1902236	negative regulation of endoplasmic reticulum stress-induced intrinsic apoptotic signaling pathway	1/44 2.27%	22/18048 0.12%	0.0523135	0.206554	ENSRNOG00000005108	Wfs1	1	ENSRNOG00000005108	Wfs1	1	--	--	0
Molecular function	GO:0005242	inward rectifier potassium channel activity	1/40 2.5%	23/16737 0.14%	0.0535812	0.158151	ENSRNOG00000029811	Kcne2	1	--	--	0	ENSRNOG00000029811	Kcne2	1
Molecular function	GO:0005416	amino acid:cation symporter activity	1/40 2.5%	23/16737 0.14%	0.0535812	0.158151	ENSRNOG00000068642	Slc6a20a	1	ENSRNOG00000068642	Slc6a20a	1	--	--	0
Molecular function	GO:0005451	monovalent cation:proton antiporter activity	1/40 2.5%	23/16737 0.14%	0.0535812	0.158151	ENSRNOG00000015567	Slc9a2	1	ENSRNOG00000015567	Slc9a2	1	--	--	0
Molecular function	GO:0015299	solute:proton antiporter activity	1/40 2.5%	23/16737 0.14%	0.0535812	0.158151	ENSRNOG00000015567	Slc9a2	1	ENSRNOG00000015567	Slc9a2	1	--	--	0
Biological process	GO:0043270	positive regulation of ion transport	3/44 6.82%	351/18048 1.94%	0.0537888	0.206554	ENSRNOG00000005108;ENSRNOG00000012609;ENSRNOG00000029811	Wfs1;Trdn;Kcne2	3	ENSRNOG00000005108;ENSRNOG00000012609	Wfs1;Trdn	2	ENSRNOG00000029811	Kcne2	1
Biological process	GO:0042593	glucose homeostasis	3/44 6.82%	352/18048 1.95%	0.0541613	0.206554	ENSRNOG00000005108;ENSRNOG00000014288;ENSRNOG00000011823	Wfs1;Fn1;Tfap2b	3	ENSRNOG00000005108;ENSRNOG00000014288;ENSRNOG00000011823	Wfs1;Fn1;Tfap2b	3	--	--	0
Biological process	GO:0033500	carbohydrate homeostasis	3/44 6.82%	353/18048 1.96%	0.0545351	0.206554	ENSRNOG00000005108;ENSRNOG00000014288;ENSRNOG00000011823	Wfs1;Fn1;Tfap2b	3	ENSRNOG00000005108;ENSRNOG00000014288;ENSRNOG00000011823	Wfs1;Fn1;Tfap2b	3	--	--	0
Biological process	GO:0033630	positive regulation of cell adhesion mediated by integrin	1/44 2.27%	23/18048 0.13%	0.0546267	0.206554	ENSRNOG00000023881	Skap1	1	ENSRNOG00000023881	Skap1	1	--	--	0
Biological process	GO:0040019	positive regulation of embryonic development	1/44 2.27%	23/18048 0.13%	0.0546267	0.206554	ENSRNOG00000004210	Osr1	1	ENSRNOG00000004210	Osr1	1	--	--	0
Biological process	GO:0042438	melanin biosynthetic process	1/44 2.27%	23/18048 0.13%	0.0546267	0.206554	ENSRNOG00000014465	Oca2	1	--	--	0	ENSRNOG00000014465	Oca2	1
Biological process	GO:0046689	response to mercury ion	1/44 2.27%	23/18048 0.13%	0.0546267	0.206554	ENSRNOG00000014288	Fn1	1	ENSRNOG00000014288	Fn1	1	--	--	0
Biological process	GO:0072111	cell proliferation involved in kidney development	1/44 2.27%	23/18048 0.13%	0.0546267	0.206554	ENSRNOG00000004210	Osr1	1	ENSRNOG00000004210	Osr1	1	--	--	0
Biological process	GO:0090190	positive regulation of branching involved in ureteric bud morphogenesis	1/44 2.27%	23/18048 0.13%	0.0546267	0.206554	ENSRNOG00000007250	Six4	1	--	--	0	ENSRNOG00000007250	Six4	1
Biological process	GO:0098719	sodium ion import across plasma membrane	1/44 2.27%	23/18048 0.13%	0.0546267	0.206554	ENSRNOG00000015567	Slc9a2	1	ENSRNOG00000015567	Slc9a2	1	--	--	0
Biological process	GO:1902259	regulation of delayed rectifier potassium channel activity	1/44 2.27%	23/18048 0.13%	0.0546267	0.206554	ENSRNOG00000029811	Kcne2	1	--	--	0	ENSRNOG00000029811	Kcne2	1
Biological process	GO:1902644	tertiary alcohol metabolic process	1/44 2.27%	23/18048 0.13%	0.0546267	0.206554	ENSRNOG00000010917	Bmp5	1	ENSRNOG00000010917	Bmp5	1	--	--	0
Molecular function	GO:0031435	mitogen-activated protein kinase kinase kinase binding	1/40 2.5%	24/16737 0.14%	0.0558461	0.16222	ENSRNOG00000052061	Ppef2	1	--	--	0	ENSRNOG00000052061	Ppef2	1
Cellular component	GO:0031307	integral component of mitochondrial outer membrane	1/46 2.17%	23/18303 0.13%	0.0562673	0.194655	ENSRNOG00000011923	Mgarp	1	--	--	0	ENSRNOG00000011923	Mgarp	1
Biological process	GO:0010766	negative regulation of sodium ion transport	1/44 2.27%	24/18048 0.13%	0.0569344	0.206554	ENSRNOG00000004210	Osr1	1	ENSRNOG00000004210	Osr1	1	--	--	0
Biological process	GO:0034643	establishment of mitochondrion localization, microtubule-mediated	1/44 2.27%	24/18048 0.13%	0.0569344	0.206554	ENSRNOG00000011923	Mgarp	1	--	--	0	ENSRNOG00000011923	Mgarp	1
Biological process	GO:0047497	mitochondrion transport along microtubule	1/44 2.27%	24/18048 0.13%	0.0569344	0.206554	ENSRNOG00000011923	Mgarp	1	--	--	0	ENSRNOG00000011923	Mgarp	1
Biological process	GO:0048485	sympathetic nervous system development	1/44 2.27%	24/18048 0.13%	0.0569344	0.206554	ENSRNOG00000011823	Tfap2b	1	ENSRNOG00000011823	Tfap2b	1	--	--	0
Biological process	GO:0051307	meiotic chromosome separation	1/44 2.27%	24/18048 0.13%	0.0569344	0.206554	ENSRNOG00000012051	Ncaph	1	--	--	0	ENSRNOG00000012051	Ncaph	1
Biological process	GO:0072170	metanephric tubule development	1/44 2.27%	24/18048 0.13%	0.0569344	0.206554	ENSRNOG00000004210	Osr1	1	ENSRNOG00000004210	Osr1	1	--	--	0
Biological process	GO:0072243	metanephric nephron epithelium development	1/44 2.27%	24/18048 0.13%	0.0569344	0.206554	ENSRNOG00000004210	Osr1	1	ENSRNOG00000004210	Osr1	1	--	--	0
Biological process	GO:1900006	positive regulation of dendrite development	1/44 2.27%	24/18048 0.13%	0.0569344	0.206554	ENSRNOG00000010917	Bmp5	1	ENSRNOG00000010917	Bmp5	1	--	--	0
Biological process	GO:1903817	negative regulation of voltage-gated potassium channel activity	1/44 2.27%	24/18048 0.13%	0.0569344	0.206554	ENSRNOG00000029811	Kcne2	1	--	--	0	ENSRNOG00000029811	Kcne2	1
Molecular function	GO:0099604	ligand-gated calcium channel activity	1/40 2.5%	25/16737 0.15%	0.0581058	0.166146	ENSRNOG00000020557	Ryr1	1	ENSRNOG00000020557	Ryr1	1	--	--	0
Cellular component	GO:0031306	intrinsic component of mitochondrial outer membrane	1/46 2.17%	24/18303 0.13%	0.0586422	0.197531	ENSRNOG00000011923	Mgarp	1	--	--	0	ENSRNOG00000011923	Mgarp	1
Biological process	GO:0070588	calcium ion transmembrane transport	3/44 6.82%	364/18048 2.02%	0.0587295	0.206554	ENSRNOG00000012609;ENSRNOG00000020557;ENSRNOG00000029811	Trdn;Ryr1;Kcne2	3	ENSRNOG00000012609;ENSRNOG00000020557	Trdn;Ryr1	2	ENSRNOG00000029811	Kcne2	1
Molecular function	GO:0004721	phosphoprotein phosphatase activity	2/40 5%	165/16737 0.99%	0.0590408	0.166223	ENSRNOG00000052061;ENSRNOG00000003407	Ppef2;Ptpn14	2	ENSRNOG00000003407	Ptpn14	1	ENSRNOG00000052061	Ppef2	1
Biological process	GO:0006582	melanin metabolic process	1/44 2.27%	25/18048 0.14%	0.0592366	0.206554	ENSRNOG00000014465	Oca2	1	--	--	0	ENSRNOG00000014465	Oca2	1
Biological process	GO:0006700	C21-steroid hormone biosynthetic process	1/44 2.27%	25/18048 0.14%	0.0592366	0.206554	ENSRNOG00000010917	Bmp5	1	ENSRNOG00000010917	Bmp5	1	--	--	0
Biological process	GO:0007530	sex determination	1/44 2.27%	25/18048 0.14%	0.0592366	0.206554	ENSRNOG00000007250	Six4	1	--	--	0	ENSRNOG00000007250	Six4	1
Biological process	GO:0008090	retrograde axonal transport	1/44 2.27%	25/18048 0.14%	0.0592366	0.206554	ENSRNOG00000011923	Mgarp	1	--	--	0	ENSRNOG00000011923	Mgarp	1
Biological process	GO:0010842	retina layer formation	1/44 2.27%	25/18048 0.14%	0.0592366	0.206554	ENSRNOG00000011823	Tfap2b	1	ENSRNOG00000011823	Tfap2b	1	--	--	0
Biological process	GO:0042219	cellular modified amino acid catabolic process	1/44 2.27%	25/18048 0.14%	0.0592366	0.206554	ENSRNOG00000026855	Abhd12b	1	--	--	0	ENSRNOG00000026855	Abhd12b	1
Biological process	GO:0044550	secondary metabolite biosynthetic process	1/44 2.27%	25/18048 0.14%	0.0592366	0.206554	ENSRNOG00000014465	Oca2	1	--	--	0	ENSRNOG00000014465	Oca2	1
Biological process	GO:0050857	positive regulation of antigen receptor-mediated signaling pathway	1/44 2.27%	25/18048 0.14%	0.0592366	0.206554	ENSRNOG00000022975	Nfam1	1	ENSRNOG00000022975	Nfam1	1	--	--	0
Biological process	GO:0072273	metanephric nephron morphogenesis	1/44 2.27%	25/18048 0.14%	0.0592366	0.206554	ENSRNOG00000068029	Six2	1	ENSRNOG00000068029	Six2	1	--	--	0
Biological process	GO:0072376	protein activation cascade	1/44 2.27%	25/18048 0.14%	0.0592366	0.206554	ENSRNOG00000014288	Fn1	1	ENSRNOG00000014288	Fn1	1	--	--	0
Biological process	GO:0086011	membrane repolarization during action potential	1/44 2.27%	25/18048 0.14%	0.0592366	0.206554	ENSRNOG00000029811	Kcne2	1	--	--	0	ENSRNOG00000029811	Kcne2	1
Biological process	GO:0099625	ventricular cardiac muscle cell membrane repolarization	1/44 2.27%	25/18048 0.14%	0.0592366	0.206554	ENSRNOG00000029811	Kcne2	1	--	--	0	ENSRNOG00000029811	Kcne2	1
Biological process	GO:1905820	positive regulation of chromosome separation	1/44 2.27%	25/18048 0.14%	0.0592366	0.206554	ENSRNOG00000012051	Ncaph	1	--	--	0	ENSRNOG00000012051	Ncaph	1
Biological process	GO:2001014	regulation of skeletal muscle cell differentiation	1/44 2.27%	25/18048 0.14%	0.0592366	0.206554	ENSRNOG00000007250	Six4	1	--	--	0	ENSRNOG00000007250	Six4	1
Molecular function	GO:0070696	transmembrane receptor protein serine/threonine kinase binding	1/40 2.5%	26/16737 0.16%	0.0603602	0.167157	ENSRNOG00000010917	Bmp5	1	ENSRNOG00000010917	Bmp5	1	--	--	0
Biological process	GO:0035637	multicellular organismal signaling	2/44 4.55%	165/18048 0.91%	0.0612165	0.210436	ENSRNOG00000012609;ENSRNOG00000029811	Trdn;Kcne2	2	ENSRNOG00000012609	Trdn	1	ENSRNOG00000029811	Kcne2	1
Biological process	GO:0003323	type B pancreatic cell development	1/44 2.27%	26/18048 0.14%	0.0615334	0.210436	ENSRNOG00000010917	Bmp5	1	ENSRNOG00000010917	Bmp5	1	--	--	0
Biological process	GO:0030539	male genitalia development	1/44 2.27%	26/18048 0.14%	0.0615334	0.210436	ENSRNOG00000010917	Bmp5	1	ENSRNOG00000010917	Bmp5	1	--	--	0
Biological process	GO:0035988	chondrocyte proliferation	1/44 2.27%	26/18048 0.14%	0.0615334	0.210436	ENSRNOG00000068029	Six2	1	ENSRNOG00000068029	Six2	1	--	--	0
Biological process	GO:0043567	regulation of insulin-like growth factor receptor signaling pathway	1/44 2.27%	26/18048 0.14%	0.0615334	0.210436	ENSRNOG00000010917	Bmp5	1	ENSRNOG00000010917	Bmp5	1	--	--	0
Biological process	GO:0051984	positive regulation of chromosome segregation	1/44 2.27%	26/18048 0.14%	0.0615334	0.210436	ENSRNOG00000012051	Ncaph	1	--	--	0	ENSRNOG00000012051	Ncaph	1
Biological process	GO:0055067	monovalent inorganic cation homeostasis	2/44 4.55%	166/18048 0.92%	0.0618694	0.210909	ENSRNOG00000015567;ENSRNOG00000011823	Slc9a2;Tfap2b	2	ENSRNOG00000015567;ENSRNOG00000011823	Slc9a2;Tfap2b	2	--	--	0
Molecular function	GO:0004181	metallocarboxypeptidase activity	1/40 2.5%	27/16737 0.16%	0.0626094	0.167157	ENSRNOG00000008947	Cpz	1	ENSRNOG00000008947	Cpz	1	--	--	0
Molecular function	GO:0140828	metal cation:monoatomic cation antiporter activity	1/40 2.5%	27/16737 0.16%	0.0626094	0.167157	ENSRNOG00000015567	Slc9a2	1	ENSRNOG00000015567	Slc9a2	1	--	--	0
Biological process	GO:0034114	regulation of heterotypic cell-cell adhesion	1/44 2.27%	27/18048 0.15%	0.0638246	0.215509	ENSRNOG00000023881	Skap1	1	ENSRNOG00000023881	Skap1	1	--	--	0
Biological process	GO:0051654	establishment of mitochondrion localization	1/44 2.27%	27/18048 0.15%	0.0638246	0.215509	ENSRNOG00000011923	Mgarp	1	--	--	0	ENSRNOG00000011923	Mgarp	1
Biological process	GO:1900101	regulation of endoplasmic reticulum unfolded protein response	1/44 2.27%	27/18048 0.15%	0.0638246	0.215509	ENSRNOG00000005108	Wfs1	1	ENSRNOG00000005108	Wfs1	1	--	--	0
Biological process	GO:0007568	aging	3/44 6.82%	378/18048 2.09%	0.0642839	0.216375	ENSRNOG00000029811;ENSRNOG00000011719;ENSRNOG00000010253	Kcne2;Ngb;Cd163	3	ENSRNOG00000010253	Cd163	1	ENSRNOG00000029811;ENSRNOG00000011719	Kcne2;Ngb	2
Molecular function	GO:0005217	intracellular ligand-gated ion channel activity	1/40 2.5%	28/16737 0.17%	0.0648533	0.167157	ENSRNOG00000020557	Ryr1	1	ENSRNOG00000020557	Ryr1	1	--	--	0
Molecular function	GO:0005343	organic acid:sodium symporter activity	1/40 2.5%	28/16737 0.17%	0.0648533	0.167157	ENSRNOG00000068642	Slc6a20a	1	ENSRNOG00000068642	Slc6a20a	1	--	--	0
Molecular function	GO:0016645	oxidoreductase activity, acting on the CH-NH group of donors	1/40 2.5%	28/16737 0.17%	0.0648533	0.167157	ENSRNOG00000061215	Crym	1	ENSRNOG00000061215	Crym	1	--	--	0
Biological process	GO:0003272	endocardial cushion formation	1/44 2.27%	28/18048 0.16%	0.0661103	0.21638	ENSRNOG00000010917	Bmp5	1	ENSRNOG00000010917	Bmp5	1	--	--	0
Biological process	GO:0007274	neuromuscular synaptic transmission	1/44 2.27%	28/18048 0.16%	0.0661103	0.21638	ENSRNOG00000013829	Chrna3	1	--	--	0	ENSRNOG00000013829	Chrna3	1
Biological process	GO:0008211	glucocorticoid metabolic process	1/44 2.27%	28/18048 0.16%	0.0661103	0.21638	ENSRNOG00000010917	Bmp5	1	ENSRNOG00000010917	Bmp5	1	--	--	0
Biological process	GO:0010575	positive regulation of vascular endothelial growth factor production	1/44 2.27%	28/18048 0.16%	0.0661103	0.21638	ENSRNOG00000062986	Ccbe1	1	ENSRNOG00000062986	Ccbe1	1	--	--	0
Biological process	GO:0010894	negative regulation of steroid biosynthetic process	1/44 2.27%	28/18048 0.16%	0.0661103	0.21638	ENSRNOG00000010917	Bmp5	1	ENSRNOG00000010917	Bmp5	1	--	--	0
Biological process	GO:0032469	endoplasmic reticulum calcium ion homeostasis	1/44 2.27%	28/18048 0.16%	0.0661103	0.21638	ENSRNOG00000005108	Wfs1	1	ENSRNOG00000005108	Wfs1	1	--	--	0
Biological process	GO:0043931	ossification involved in bone maturation	1/44 2.27%	28/18048 0.16%	0.0661103	0.21638	ENSRNOG00000020557	Ryr1	1	ENSRNOG00000020557	Ryr1	1	--	--	0
Biological process	GO:0060713	labyrinthine layer morphogenesis	1/44 2.27%	28/18048 0.16%	0.0661103	0.21638	ENSRNOG00000010917	Bmp5	1	ENSRNOG00000010917	Bmp5	1	--	--	0
Biological process	GO:1900746	regulation of vascular endothelial growth factor signaling pathway	1/44 2.27%	28/18048 0.16%	0.0661103	0.21638	ENSRNOG00000062986	Ccbe1	1	ENSRNOG00000062986	Ccbe1	1	--	--	0
Molecular function	GO:0005516	calmodulin binding	2/40 5%	176/16737 1.05%	0.0661186	0.168051	ENSRNOG00000005108;ENSRNOG00000020557	Wfs1;Ryr1	2	ENSRNOG00000005108;ENSRNOG00000020557	Wfs1;Ryr1	2	--	--	0
Biological process	GO:0050851	antigen receptor-mediated signaling pathway	2/44 4.55%	173/18048 0.96%	0.0665066	0.217011	ENSRNOG00000022975;ENSRNOG00000023881	Nfam1;Skap1	2	ENSRNOG00000022975;ENSRNOG00000023881	Nfam1;Skap1	2	--	--	0
Biological process	GO:0045862	positive regulation of proteolysis	3/44 6.82%	384/18048 2.13%	0.0667372	0.217099	ENSRNOG00000062986;ENSRNOG00000014288;ENSRNOG00000029811	Ccbe1;Fn1;Kcne2	3	ENSRNOG00000062986;ENSRNOG00000014288	Ccbe1;Fn1	2	ENSRNOG00000029811	Kcne2	1
Molecular function	GO:0019825	oxygen binding	1/40 2.5%	29/16737 0.17%	0.067092	0.168189	ENSRNOG00000011719	Ngb	1	--	--	0	ENSRNOG00000011719	Ngb	1
Biological process	GO:0010880	regulation of release of sequestered calcium ion into cytosol by sarcoplasmic reticulum	1/44 2.27%	29/18048 0.16%	0.0683907	0.217829	ENSRNOG00000012609	Trdn	1	ENSRNOG00000012609	Trdn	1	--	--	0
Biological process	GO:0030318	melanocyte differentiation	1/44 2.27%	29/18048 0.16%	0.0683907	0.217829	ENSRNOG00000014465	Oca2	1	--	--	0	ENSRNOG00000014465	Oca2	1
Biological process	GO:0034695	response to prostaglandin E	1/44 2.27%	29/18048 0.16%	0.0683907	0.217829	ENSRNOG00000014288	Fn1	1	ENSRNOG00000014288	Fn1	1	--	--	0
Biological process	GO:0045939	negative regulation of steroid metabolic process	1/44 2.27%	29/18048 0.16%	0.0683907	0.217829	ENSRNOG00000010917	Bmp5	1	ENSRNOG00000010917	Bmp5	1	--	--	0
Biological process	GO:0060571	morphogenesis of an epithelial fold	1/44 2.27%	29/18048 0.16%	0.0683907	0.217829	ENSRNOG00000010917	Bmp5	1	ENSRNOG00000010917	Bmp5	1	--	--	0
Biological process	GO:0072207	metanephric epithelium development	1/44 2.27%	29/18048 0.16%	0.0683907	0.217829	ENSRNOG00000004210	Osr1	1	ENSRNOG00000004210	Osr1	1	--	--	0
Biological process	GO:1903206	negative regulation of hydrogen peroxide-induced cell death	1/44 2.27%	29/18048 0.16%	0.0683907	0.217829	ENSRNOG00000011719	Ngb	1	--	--	0	ENSRNOG00000011719	Ngb	1
Biological process	GO:0035107	appendage morphogenesis	2/44 4.55%	177/18048 0.98%	0.0692075	0.219123	ENSRNOG00000004210;ENSRNOG00000011823	Osr1;Tfap2b	2	ENSRNOG00000004210;ENSRNOG00000011823	Osr1;Tfap2b	2	--	--	0
Biological process	GO:0035108	limb morphogenesis	2/44 4.55%	177/18048 0.98%	0.0692075	0.219123	ENSRNOG00000004210;ENSRNOG00000011823	Osr1;Tfap2b	2	ENSRNOG00000004210;ENSRNOG00000011823	Osr1;Tfap2b	2	--	--	0
Biological process	GO:0030509	BMP signaling pathway	2/44 4.55%	179/18048 0.99%	0.0705716	0.219186	ENSRNOG00000011823;ENSRNOG00000010917	Tfap2b;Bmp5	2	ENSRNOG00000011823;ENSRNOG00000010917	Tfap2b;Bmp5	2	--	--	0
Biological process	GO:0002029	desensitization of G protein-coupled receptor signaling pathway	1/44 2.27%	30/18048 0.17%	0.0706655	0.219186	ENSRNOG00000027157	Ly6g6e	1	--	--	0	ENSRNOG00000027157	Ly6g6e	1
Biological process	GO:0022401	negative adaptation of signaling pathway	1/44 2.27%	30/18048 0.17%	0.0706655	0.219186	ENSRNOG00000027157	Ly6g6e	1	--	--	0	ENSRNOG00000027157	Ly6g6e	1
Biological process	GO:0035809	regulation of urine volume	1/44 2.27%	30/18048 0.17%	0.0706655	0.219186	ENSRNOG00000011823	Tfap2b	1	ENSRNOG00000011823	Tfap2b	1	--	--	0
Biological process	GO:0050995	negative regulation of lipid catabolic process	1/44 2.27%	30/18048 0.17%	0.0706655	0.219186	ENSRNOG00000026661	Hcar1	1	ENSRNOG00000026661	Hcar1	1	--	--	0
Biological process	GO:0099623	regulation of cardiac muscle cell membrane repolarization	1/44 2.27%	30/18048 0.17%	0.0706655	0.219186	ENSRNOG00000029811	Kcne2	1	--	--	0	ENSRNOG00000029811	Kcne2	1
Biological process	GO:1902547	regulation of cellular response to vascular endothelial growth factor stimulus	1/44 2.27%	30/18048 0.17%	0.0706655	0.219186	ENSRNOG00000062986	Ccbe1	1	ENSRNOG00000062986	Ccbe1	1	--	--	0
Biological process	GO:0007548	sex differentiation	3/44 6.82%	394/18048 2.18%	0.0709215	0.219343	ENSRNOG00000007250;ENSRNOG00000004210;ENSRNOG00000010917	Six4;Osr1;Bmp5	3	ENSRNOG00000004210;ENSRNOG00000010917	Osr1;Bmp5	2	ENSRNOG00000007250	Six4	1
Biological process	GO:0006839	mitochondrial transport	2/44 4.55%	181/18048 1%	0.0719445	0.220205	ENSRNOG00000061215;ENSRNOG00000011923	Crym;Mgarp	2	ENSRNOG00000061215	Crym	1	ENSRNOG00000011923	Mgarp	1
Cellular component	GO:0097440	apical dendrite	1/46 2.17%	30/18303 0.16%	0.0727688	0.231672	ENSRNOG00000030568	Rgs12	1	ENSRNOG00000030568	Rgs12	1	--	--	0
Biological process	GO:0003338	metanephros morphogenesis	1/44 2.27%	31/18048 0.17%	0.072935	0.220205	ENSRNOG00000068029	Six2	1	ENSRNOG00000068029	Six2	1	--	--	0
Biological process	GO:0006929	substrate-dependent cell migration	1/44 2.27%	31/18048 0.17%	0.072935	0.220205	ENSRNOG00000014288	Fn1	1	ENSRNOG00000014288	Fn1	1	--	--	0
Biological process	GO:0070977	bone maturation	1/44 2.27%	31/18048 0.17%	0.072935	0.220205	ENSRNOG00000020557	Ryr1	1	ENSRNOG00000020557	Ryr1	1	--	--	0
Biological process	GO:0072012	glomerulus vasculature development	1/44 2.27%	31/18048 0.17%	0.072935	0.220205	ENSRNOG00000004210	Osr1	1	ENSRNOG00000004210	Osr1	1	--	--	0
Biological process	GO:0086005	ventricular cardiac muscle cell action potential	1/44 2.27%	31/18048 0.17%	0.072935	0.220205	ENSRNOG00000029811	Kcne2	1	--	--	0	ENSRNOG00000029811	Kcne2	1
Biological process	GO:1900078	positive regulation of cellular response to insulin stimulus	1/44 2.27%	31/18048 0.17%	0.072935	0.220205	ENSRNOG00000013793	C1qtnf9	1	--	--	0	ENSRNOG00000013793	C1qtnf9	1
Biological process	GO:1901032	negative regulation of response to reactive oxygen species	1/44 2.27%	31/18048 0.17%	0.072935	0.220205	ENSRNOG00000011719	Ngb	1	--	--	0	ENSRNOG00000011719	Ngb	1
Cellular component	GO:0042383	sarcolemma	2/46 4.35%	177/18303 0.97%	0.0729872	0.231672	ENSRNOG00000012609;ENSRNOG00000020557	Trdn;Ryr1	2	ENSRNOG00000012609;ENSRNOG00000020557	Trdn;Ryr1	2	--	--	0
Biological process	GO:0071375	cellular response to peptide hormone stimulus	3/44 6.82%	399/18048 2.21%	0.0730578	0.220205	ENSRNOG00000013793;ENSRNOG00000014288;ENSRNOG00000011923	C1qtnf9;Fn1;Mgarp	3	ENSRNOG00000014288	Fn1	1	ENSRNOG00000013793;ENSRNOG00000011923	C1qtnf9;Mgarp	2
Biological process	GO:0030856	regulation of epithelial cell differentiation	2/44 4.55%	184/18048 1.02%	0.0740204	0.22165	ENSRNOG00000068029;ENSRNOG00000004210	Six2;Osr1	2	ENSRNOG00000068029;ENSRNOG00000004210	Six2;Osr1	2	--	--	0
Cellular component	GO:0002080	acrosomal membrane	1/46 2.17%	31/18303 0.17%	0.075103	0.231672	ENSRNOG00000017510	Mfge8	1	ENSRNOG00000017510	Mfge8	1	--	--	0
Biological process	GO:0010954	positive regulation of protein processing	1/44 2.27%	32/18048 0.18%	0.075199	0.22165	ENSRNOG00000062986	Ccbe1	1	ENSRNOG00000062986	Ccbe1	1	--	--	0
Biological process	GO:0023058	adaptation of signaling pathway	1/44 2.27%	32/18048 0.18%	0.075199	0.22165	ENSRNOG00000027157	Ly6g6e	1	--	--	0	ENSRNOG00000027157	Ly6g6e	1
Biological process	GO:0031000	response to caffeine	1/44 2.27%	32/18048 0.18%	0.075199	0.22165	ENSRNOG00000020557	Ryr1	1	ENSRNOG00000020557	Ryr1	1	--	--	0
Biological process	GO:0060669	embryonic placenta morphogenesis	1/44 2.27%	32/18048 0.18%	0.075199	0.22165	ENSRNOG00000010917	Bmp5	1	ENSRNOG00000010917	Bmp5	1	--	--	0
Biological process	GO:0060795	cell fate commitment involved in formation of primary germ layer	1/44 2.27%	32/18048 0.18%	0.075199	0.22165	ENSRNOG00000068029	Six2	1	ENSRNOG00000068029	Six2	1	--	--	0
Biological process	GO:0120255	olefinic compound biosynthetic process	1/44 2.27%	32/18048 0.18%	0.075199	0.22165	ENSRNOG00000010917	Bmp5	1	ENSRNOG00000010917	Bmp5	1	--	--	0
Biological process	GO:1902235	regulation of endoplasmic reticulum stress-induced intrinsic apoptotic signaling pathway	1/44 2.27%	32/18048 0.18%	0.075199	0.22165	ENSRNOG00000005108	Wfs1	1	ENSRNOG00000005108	Wfs1	1	--	--	0
Molecular function	GO:0015101	organic cation transmembrane transporter activity	1/40 2.5%	33/16737 0.2%	0.0759945	0.187932	ENSRNOG00000068642	Slc6a20a	1	ENSRNOG00000068642	Slc6a20a	1	--	--	0
Cellular component	GO:0008305	integrin complex	1/46 2.17%	32/18303 0.17%	0.0774314	0.231672	ENSRNOG00000004516	Itgbl1	1	ENSRNOG00000004516	Itgbl1	1	--	--	0
Biological process	GO:0042403	thyroid hormone metabolic process	1/44 2.27%	33/18048 0.18%	0.0774576	0.224585	ENSRNOG00000061215	Crym	1	ENSRNOG00000061215	Crym	1	--	--	0
Biological process	GO:0045577	regulation of B cell differentiation	1/44 2.27%	33/18048 0.18%	0.0774576	0.224585	ENSRNOG00000022975	Nfam1	1	ENSRNOG00000022975	Nfam1	1	--	--	0
Biological process	GO:0046475	glycerophospholipid catabolic process	1/44 2.27%	33/18048 0.18%	0.0774576	0.224585	ENSRNOG00000026855	Abhd12b	1	--	--	0	ENSRNOG00000026855	Abhd12b	1
Biological process	GO:0046885	regulation of hormone biosynthetic process	1/44 2.27%	33/18048 0.18%	0.0774576	0.224585	ENSRNOG00000010917	Bmp5	1	ENSRNOG00000010917	Bmp5	1	--	--	0
Biological process	GO:0061437	renal system vasculature development	1/44 2.27%	33/18048 0.18%	0.0774576	0.224585	ENSRNOG00000004210	Osr1	1	ENSRNOG00000004210	Osr1	1	--	--	0
Biological process	GO:0061440	kidney vasculature development	1/44 2.27%	33/18048 0.18%	0.0774576	0.224585	ENSRNOG00000004210	Osr1	1	ENSRNOG00000004210	Osr1	1	--	--	0
Molecular function	GO:0015298	solute:cation antiporter activity	1/40 2.5%	34/16737 0.2%	0.0782071	0.188315	ENSRNOG00000015567	Slc9a2	1	ENSRNOG00000015567	Slc9a2	1	--	--	0
Molecular function	GO:0033612	receptor serine/threonine kinase binding	1/40 2.5%	34/16737 0.2%	0.0782071	0.188315	ENSRNOG00000010917	Bmp5	1	ENSRNOG00000010917	Bmp5	1	--	--	0
Cellular component	GO:0019897	extrinsic component of plasma membrane	2/46 4.35%	185/18303 1.01%	0.0787671	0.231672	ENSRNOG00000020557;ENSRNOG00000017510	Ryr1;Mfge8	2	ENSRNOG00000020557;ENSRNOG00000017510	Ryr1;Mfge8	2	--	--	0
Biological process	GO:0097553	calcium ion transmembrane import into cytosol	2/44 4.55%	191/18048 1.06%	0.0789387	0.22802	ENSRNOG00000012609;ENSRNOG00000020557	Trdn;Ryr1	2	ENSRNOG00000012609;ENSRNOG00000020557	Trdn;Ryr1	2	--	--	0
Biological process	GO:0003401	axis elongation	1/44 2.27%	34/18048 0.19%	0.0797108	0.22802	ENSRNOG00000007250	Six4	1	--	--	0	ENSRNOG00000007250	Six4	1
Biological process	GO:0007271	synaptic transmission, cholinergic	1/44 2.27%	34/18048 0.19%	0.0797108	0.22802	ENSRNOG00000013829	Chrna3	1	--	--	0	ENSRNOG00000013829	Chrna3	1
Biological process	GO:1901017	negative regulation of potassium ion transmembrane transporter activity	1/44 2.27%	34/18048 0.19%	0.0797108	0.22802	ENSRNOG00000029811	Kcne2	1	--	--	0	ENSRNOG00000029811	Kcne2	1
Biological process	GO:1903319	positive regulation of protein maturation	1/44 2.27%	34/18048 0.19%	0.0797108	0.22802	ENSRNOG00000062986	Ccbe1	1	ENSRNOG00000062986	Ccbe1	1	--	--	0
Cellular component	GO:0016324	apical plasma membrane	3/46 6.52%	403/18303 2.2%	0.0803776	0.231672	ENSRNOG00000014288;ENSRNOG00000068642;ENSRNOG00000015567	Fn1;Slc6a20a;Slc9a2	3	ENSRNOG00000014288;ENSRNOG00000068642;ENSRNOG00000015567	Fn1;Slc6a20a;Slc9a2	3	--	--	0
Biological process	GO:0097306	cellular response to alcohol	2/44 4.55%	194/18048 1.07%	0.0810776	0.228926	ENSRNOG00000014288;ENSRNOG00000046468	Fn1;Ptgfr	2	ENSRNOG00000014288;ENSRNOG00000046468	Fn1;Ptgfr	2	--	--	0
Biological process	GO:1901214	regulation of neuron death	3/44 6.82%	418/18048 2.32%	0.0814377	0.228926	ENSRNOG00000005108;ENSRNOG00000007250;ENSRNOG00000011823	Wfs1;Six4;Tfap2b	3	ENSRNOG00000005108;ENSRNOG00000011823	Wfs1;Tfap2b	2	ENSRNOG00000007250	Six4	1
Biological process	GO:0006575	cellular modified amino acid metabolic process	2/44 4.55%	195/18048 1.08%	0.0817946	0.228926	ENSRNOG00000061215;ENSRNOG00000026855	Crym;Abhd12b	2	ENSRNOG00000061215	Crym	1	ENSRNOG00000026855	Abhd12b	1
Biological process	GO:0048754	branching morphogenesis of an epithelial tube	2/44 4.55%	195/18048 1.08%	0.0817946	0.228926	ENSRNOG00000007250;ENSRNOG00000068029	Six4;Six2	2	ENSRNOG00000068029	Six2	1	ENSRNOG00000007250	Six4	1
Biological process	GO:0048608	reproductive structure development	3/44 6.82%	419/18048 2.32%	0.0818901	0.228926	ENSRNOG00000007250;ENSRNOG00000004210;ENSRNOG00000010917	Six4;Osr1;Bmp5	3	ENSRNOG00000004210;ENSRNOG00000010917	Osr1;Bmp5	2	ENSRNOG00000007250	Six4	1
Biological process	GO:0006536	glutamate metabolic process	1/44 2.27%	35/18048 0.19%	0.0819587	0.228926	ENSRNOG00000001261	Ftcd	1	--	--	0	ENSRNOG00000001261	Ftcd	1
Biological process	GO:0035116	embryonic hindlimb morphogenesis	1/44 2.27%	35/18048 0.19%	0.0819587	0.228926	ENSRNOG00000004210	Osr1	1	ENSRNOG00000004210	Osr1	1	--	--	0
Biological process	GO:0048799	animal organ maturation	1/44 2.27%	35/18048 0.19%	0.0819587	0.228926	ENSRNOG00000020557	Ryr1	1	ENSRNOG00000020557	Ryr1	1	--	--	0
Biological process	GO:0072337	modified amino acid transport	1/44 2.27%	35/18048 0.19%	0.0819587	0.228926	ENSRNOG00000068642	Slc6a20a	1	ENSRNOG00000068642	Slc6a20a	1	--	--	0
Biological process	GO:0051260	protein homooligomerization	2/44 4.55%	197/18048 1.09%	0.0832347	0.230366	ENSRNOG00000020557;ENSRNOG00000004535	Ryr1;Kcng3	2	ENSRNOG00000020557;ENSRNOG00000004535	Ryr1;Kcng3	2	--	--	0
Biological process	GO:0061458	reproductive system development	3/44 6.82%	424/18048 2.35%	0.0841685	0.230366	ENSRNOG00000007250;ENSRNOG00000004210;ENSRNOG00000010917	Six4;Osr1;Bmp5	3	ENSRNOG00000004210;ENSRNOG00000010917	Osr1;Bmp5	2	ENSRNOG00000007250	Six4	1
Biological process	GO:0009954	proximal/distal pattern formation	1/44 2.27%	36/18048 0.2%	0.0842012	0.230366	ENSRNOG00000004210	Osr1	1	ENSRNOG00000004210	Osr1	1	--	--	0
Biological process	GO:0018149	peptide cross-linking	1/44 2.27%	36/18048 0.2%	0.0842012	0.230366	ENSRNOG00000014288	Fn1	1	ENSRNOG00000014288	Fn1	1	--	--	0
Biological process	GO:0035115	embryonic forelimb morphogenesis	1/44 2.27%	36/18048 0.2%	0.0842012	0.230366	ENSRNOG00000004210	Osr1	1	ENSRNOG00000004210	Osr1	1	--	--	0
Biological process	GO:0048333	mesodermal cell differentiation	1/44 2.27%	36/18048 0.2%	0.0842012	0.230366	ENSRNOG00000068029	Six2	1	ENSRNOG00000068029	Six2	1	--	--	0
Biological process	GO:0048566	embryonic digestive tract development	1/44 2.27%	36/18048 0.2%	0.0842012	0.230366	ENSRNOG00000068029	Six2	1	ENSRNOG00000068029	Six2	1	--	--	0
Biological process	GO:0099622	cardiac muscle cell membrane repolarization	1/44 2.27%	36/18048 0.2%	0.0842012	0.230366	ENSRNOG00000029811	Kcne2	1	--	--	0	ENSRNOG00000029811	Kcne2	1
Cellular component	GO:0045121	membrane raft	3/46 6.52%	412/18303 2.25%	0.0845929	0.231672	ENSRNOG00000022975;ENSRNOG00000013829;ENSRNOG00000023881	Nfam1;Chrna3;Skap1	3	ENSRNOG00000022975;ENSRNOG00000023881	Nfam1;Skap1	2	ENSRNOG00000013829	Chrna3	1
Cellular component	GO:0043235	receptor complex	3/46 6.52%	413/18303 2.26%	0.0850671	0.231672	ENSRNOG00000004516;ENSRNOG00000013829;ENSRNOG00000023881	Itgbl1;Chrna3;Skap1	3	ENSRNOG00000004516;ENSRNOG00000023881	Itgbl1;Skap1	2	ENSRNOG00000013829	Chrna3	1
Cellular component	GO:0098857	membrane microdomain	3/46 6.52%	413/18303 2.26%	0.0850671	0.231672	ENSRNOG00000022975;ENSRNOG00000013829;ENSRNOG00000023881	Nfam1;Chrna3;Skap1	3	ENSRNOG00000022975;ENSRNOG00000023881	Nfam1;Skap1	2	ENSRNOG00000013829	Chrna3	1
Biological process	GO:1904064	positive regulation of cation transmembrane transport	2/44 4.55%	201/18048 1.11%	0.0861383	0.232903	ENSRNOG00000012609;ENSRNOG00000029811	Trdn;Kcne2	2	ENSRNOG00000012609	Trdn	1	ENSRNOG00000029811	Kcne2	1
Biological process	GO:0003309	type B pancreatic cell differentiation	1/44 2.27%	37/18048 0.21%	0.0864383	0.232903	ENSRNOG00000010917	Bmp5	1	ENSRNOG00000010917	Bmp5	1	--	--	0
Biological process	GO:0035909	aorta morphogenesis	1/44 2.27%	37/18048 0.21%	0.0864383	0.232903	ENSRNOG00000011823	Tfap2b	1	ENSRNOG00000011823	Tfap2b	1	--	--	0
Biological process	GO:0061384	heart trabecula morphogenesis	1/44 2.27%	37/18048 0.21%	0.0864383	0.232903	ENSRNOG00000010917	Bmp5	1	ENSRNOG00000010917	Bmp5	1	--	--	0
Biological process	GO:0086091	regulation of heart rate by cardiac conduction	1/44 2.27%	37/18048 0.21%	0.0864383	0.232903	ENSRNOG00000029811	Kcne2	1	--	--	0	ENSRNOG00000029811	Kcne2	1
Biological process	GO:1902883	negative regulation of response to oxidative stress	1/44 2.27%	37/18048 0.21%	0.0864383	0.232903	ENSRNOG00000011719	Ngb	1	--	--	0	ENSRNOG00000011719	Ngb	1
Molecular function	GO:0016504	peptidase activator activity	1/40 2.5%	38/16737 0.23%	0.0870062	0.20413	ENSRNOG00000014288	Fn1	1	ENSRNOG00000014288	Fn1	1	--	--	0
Molecular function	GO:0097718	disordered domain specific binding	1/40 2.5%	38/16737 0.23%	0.0870062	0.20413	ENSRNOG00000014288	Fn1	1	ENSRNOG00000014288	Fn1	1	--	--	0
Biological process	GO:0050878	regulation of body fluid levels	3/44 6.82%	432/18048 2.39%	0.0878709	0.236167	ENSRNOG00000005108;ENSRNOG00000014288;ENSRNOG00000011823	Wfs1;Fn1;Tfap2b	3	ENSRNOG00000005108;ENSRNOG00000014288;ENSRNOG00000011823	Wfs1;Fn1;Tfap2b	3	--	--	0
Biological process	GO:0003203	endocardial cushion morphogenesis	1/44 2.27%	38/18048 0.21%	0.0886701	0.23712	ENSRNOG00000010917	Bmp5	1	ENSRNOG00000010917	Bmp5	1	--	--	0
Biological process	GO:0055075	potassium ion homeostasis	1/44 2.27%	38/18048 0.21%	0.0886701	0.23712	ENSRNOG00000011823	Tfap2b	1	ENSRNOG00000011823	Tfap2b	1	--	--	0
Molecular function	GO:0043394	proteoglycan binding	1/40 2.5%	39/16737 0.23%	0.0891932	0.206612	ENSRNOG00000014288	Fn1	1	ENSRNOG00000014288	Fn1	1	--	--	0
Biological process	GO:1904062	regulation of cation transmembrane transport	3/44 6.82%	437/18048 2.42%	0.0902201	0.239413	ENSRNOG00000012609;ENSRNOG00000029811;ENSRNOG00000004210	Trdn;Kcne2;Osr1	3	ENSRNOG00000012609;ENSRNOG00000004210	Trdn;Osr1	2	ENSRNOG00000029811	Kcne2	1
Biological process	GO:0006910	phagocytosis, recognition	1/44 2.27%	39/18048 0.22%	0.0908965	0.239413	ENSRNOG00000017510	Mfge8	1	ENSRNOG00000017510	Mfge8	1	--	--	0
Biological process	GO:0036120	cellular response to platelet-derived growth factor stimulus	1/44 2.27%	39/18048 0.22%	0.0908965	0.239413	ENSRNOG00000014288	Fn1	1	ENSRNOG00000014288	Fn1	1	--	--	0
Biological process	GO:0046825	regulation of protein export from nucleus	1/44 2.27%	39/18048 0.22%	0.0908965	0.239413	ENSRNOG00000003407	Ptpn14	1	ENSRNOG00000003407	Ptpn14	1	--	--	0
Biological process	GO:0120178	steroid hormone biosynthetic process	1/44 2.27%	39/18048 0.22%	0.0908965	0.239413	ENSRNOG00000010917	Bmp5	1	ENSRNOG00000010917	Bmp5	1	--	--	0
Biological process	GO:1901380	negative regulation of potassium ion transmembrane transport	1/44 2.27%	39/18048 0.22%	0.0908965	0.239413	ENSRNOG00000029811	Kcne2	1	--	--	0	ENSRNOG00000029811	Kcne2	1
Biological process	GO:0006875	cellular metal ion homeostasis	3/44 6.82%	441/18048 2.44%	0.0921187	0.239413	ENSRNOG00000005108;ENSRNOG00000012609;ENSRNOG00000020557	Wfs1;Trdn;Ryr1	3	ENSRNOG00000005108;ENSRNOG00000012609;ENSRNOG00000020557	Wfs1;Trdn;Ryr1	3	--	--	0
Biological process	GO:0008016	regulation of heart contraction	2/44 4.55%	210/18048 1.16%	0.0927826	0.239413	ENSRNOG00000012609;ENSRNOG00000029811	Trdn;Kcne2	2	ENSRNOG00000012609	Trdn	1	ENSRNOG00000029811	Kcne2	1
Biological process	GO:0048736	appendage development	2/44 4.55%	210/18048 1.16%	0.0927826	0.239413	ENSRNOG00000004210;ENSRNOG00000011823	Osr1;Tfap2b	2	ENSRNOG00000004210;ENSRNOG00000011823	Osr1;Tfap2b	2	--	--	0
Biological process	GO:0060173	limb development	2/44 4.55%	210/18048 1.16%	0.0927826	0.239413	ENSRNOG00000004210;ENSRNOG00000011823	Osr1;Tfap2b	2	ENSRNOG00000004210;ENSRNOG00000011823	Osr1;Tfap2b	2	--	--	0
Biological process	GO:2001257	regulation of cation channel activity	2/44 4.55%	210/18048 1.16%	0.0927826	0.239413	ENSRNOG00000012609;ENSRNOG00000029811	Trdn;Kcne2	2	ENSRNOG00000012609	Trdn	1	ENSRNOG00000029811	Kcne2	1
Biological process	GO:0002068	glandular epithelial cell development	1/44 2.27%	40/18048 0.22%	0.0931177	0.239413	ENSRNOG00000010917	Bmp5	1	ENSRNOG00000010917	Bmp5	1	--	--	0
Biological process	GO:0033198	response to ATP	1/44 2.27%	40/18048 0.22%	0.0931177	0.239413	ENSRNOG00000020557	Ryr1	1	ENSRNOG00000020557	Ryr1	1	--	--	0
Biological process	GO:0048009	insulin-like growth factor receptor signaling pathway	1/44 2.27%	40/18048 0.22%	0.0931177	0.239413	ENSRNOG00000010917	Bmp5	1	ENSRNOG00000010917	Bmp5	1	--	--	0
Biological process	GO:0050931	pigment cell differentiation	1/44 2.27%	40/18048 0.22%	0.0931177	0.239413	ENSRNOG00000014465	Oca2	1	--	--	0	ENSRNOG00000014465	Oca2	1
Biological process	GO:1903205	regulation of hydrogen peroxide-induced cell death	1/44 2.27%	40/18048 0.22%	0.0931177	0.239413	ENSRNOG00000011719	Ngb	1	--	--	0	ENSRNOG00000011719	Ngb	1
Molecular function	GO:0001965	G-protein alpha-subunit binding	1/40 2.5%	41/16737 0.24%	0.0935517	0.211358	ENSRNOG00000030568	Rgs12	1	ENSRNOG00000030568	Rgs12	1	--	--	0
Molecular function	GO:0015175	neutral amino acid transmembrane transporter activity	1/40 2.5%	41/16737 0.24%	0.0935517	0.211358	ENSRNOG00000068642	Slc6a20a	1	ENSRNOG00000068642	Slc6a20a	1	--	--	0
Biological process	GO:1903169	regulation of calcium ion transmembrane transport	2/44 4.55%	212/18048 1.17%	0.0942793	0.241817	ENSRNOG00000012609;ENSRNOG00000029811	Trdn;Kcne2	2	ENSRNOG00000012609	Trdn	1	ENSRNOG00000029811	Kcne2	1
Cellular component	GO:0030139	endocytic vesicle	2/46 4.35%	206/18303 1.13%	0.0945855	0.252228	ENSRNOG00000031607;ENSRNOG00000065254	LOC120093125;RT1-CE16	2	--	--	0	ENSRNOG00000031607;ENSRNOG00000065254	LOC120093125;RT1-CE16	2
Biological process	GO:0060306	regulation of membrane repolarization	1/44 2.27%	41/18048 0.23%	0.0953335	0.243935	ENSRNOG00000029811	Kcne2	1	--	--	0	ENSRNOG00000029811	Kcne2	1
Molecular function	GO:0042169	SH2 domain binding	1/40 2.5%	42/16737 0.25%	0.0957234	0.213627	ENSRNOG00000023881	Skap1	1	ENSRNOG00000023881	Skap1	1	--	--	0
Biological process	GO:0007519	skeletal muscle tissue development	2/44 4.55%	215/18048 1.19%	0.0965376	0.246425	ENSRNOG00000007250;ENSRNOG00000020557	Six4;Ryr1	2	ENSRNOG00000020557	Ryr1	1	ENSRNOG00000007250	Six4	1
Biological process	GO:0007143	female meiotic nuclear division	1/44 2.27%	42/18048 0.23%	0.0975441	0.246634	ENSRNOG00000012051	Ncaph	1	--	--	0	ENSRNOG00000012051	Ncaph	1
Biological process	GO:0036119	response to platelet-derived growth factor	1/44 2.27%	42/18048 0.23%	0.0975441	0.246634	ENSRNOG00000014288	Fn1	1	ENSRNOG00000014288	Fn1	1	--	--	0
Biological process	GO:0086065	cell communication involved in cardiac conduction	1/44 2.27%	42/18048 0.23%	0.0975441	0.246634	ENSRNOG00000012609	Trdn	1	ENSRNOG00000012609	Trdn	1	--	--	0
Biological process	GO:1905332	positive regulation of morphogenesis of an epithelium	1/44 2.27%	42/18048 0.23%	0.0975441	0.246634	ENSRNOG00000007250	Six4	1	--	--	0	ENSRNOG00000007250	Six4	1
Molecular function	GO:0004180	carboxypeptidase activity	1/40 2.5%	43/16737 0.26%	0.09789	0.21583	ENSRNOG00000008947	Cpz	1	ENSRNOG00000008947	Cpz	1	--	--	0
Biological process	GO:0071466	cellular response to xenobiotic stimulus	2/44 4.55%	218/18048 1.21%	0.0988116	0.248674	ENSRNOG00000029811;ENSRNOG00000003620	Kcne2;Fmo3	2	ENSRNOG00000003620	Fmo3	1	ENSRNOG00000029811	Kcne2	1
Biological process	GO:0006984	ER-nucleus signaling pathway	1/44 2.27%	43/18048 0.24%	0.0997493	0.248674	ENSRNOG00000005108	Wfs1	1	ENSRNOG00000005108	Wfs1	1	--	--	0
Biological process	GO:0035883	enteroendocrine cell differentiation	1/44 2.27%	43/18048 0.24%	0.0997493	0.248674	ENSRNOG00000010917	Bmp5	1	ENSRNOG00000010917	Bmp5	1	--	--	0
Biological process	GO:0071634	regulation of transforming growth factor beta production	1/44 2.27%	43/18048 0.24%	0.0997493	0.248674	ENSRNOG00000014288	Fn1	1	ENSRNOG00000014288	Fn1	1	--	--	0
Biological process	GO:0086002	cardiac muscle cell action potential involved in contraction	1/44 2.27%	43/18048 0.24%	0.0997493	0.248674	ENSRNOG00000029811	Kcne2	1	--	--	0	ENSRNOG00000029811	Kcne2	1
Biological process	GO:0110110	positive regulation of animal organ morphogenesis	1/44 2.27%	43/18048 0.24%	0.0997493	0.248674	ENSRNOG00000007250	Six4	1	--	--	0	ENSRNOG00000007250	Six4	1
Biological process	GO:0002429	immune response-activating cell surface receptor signaling pathway	2/44 4.55%	221/18048 1.22%	0.101101	0.250069	ENSRNOG00000022975;ENSRNOG00000023881	Nfam1;Skap1	2	ENSRNOG00000022975;ENSRNOG00000023881	Nfam1;Skap1	2	--	--	0
Biological process	GO:0003012	muscle system process	3/44 6.82%	460/18048 2.55%	0.101365	0.250069	ENSRNOG00000020557;ENSRNOG00000029811;ENSRNOG00000013829	Ryr1;Kcne2;Chrna3	3	ENSRNOG00000020557	Ryr1	1	ENSRNOG00000029811;ENSRNOG00000013829	Kcne2;Chrna3	2
Biological process	GO:0002757	immune response-activating signal transduction	2/44 4.55%	222/18048 1.23%	0.101867	0.250069	ENSRNOG00000022975;ENSRNOG00000023881	Nfam1;Skap1	2	ENSRNOG00000022975;ENSRNOG00000023881	Nfam1;Skap1	2	--	--	0
Biological process	GO:0034767	positive regulation of ion transmembrane transport	2/44 4.55%	222/18048 1.23%	0.101867	0.250069	ENSRNOG00000012609;ENSRNOG00000029811	Trdn;Kcne2	2	ENSRNOG00000012609	Trdn	1	ENSRNOG00000029811	Kcne2	1
Biological process	GO:0010259	multicellular organism aging	1/44 2.27%	44/18048 0.24%	0.101949	0.250069	ENSRNOG00000010253	Cd163	1	ENSRNOG00000010253	Cd163	1	--	--	0
Biological process	GO:0036474	cell death in response to hydrogen peroxide	1/44 2.27%	44/18048 0.24%	0.101949	0.250069	ENSRNOG00000011719	Ngb	1	--	--	0	ENSRNOG00000011719	Ngb	1
Biological process	GO:0048741	skeletal muscle fiber development	1/44 2.27%	44/18048 0.24%	0.101949	0.250069	ENSRNOG00000020557	Ryr1	1	ENSRNOG00000020557	Ryr1	1	--	--	0
Molecular function	GO:0016709	oxidoreductase activity, acting on paired donors, with incorporation or reduction of molecular oxygen, NAD(P)H as one donor, and incorporation of one atom of oxygen	1/40 2.5%	45/16737 0.27%	0.102208	0.222067	ENSRNOG00000003620	Fmo3	1	ENSRNOG00000003620	Fmo3	1	--	--	0
Biological process	GO:0001666	response to hypoxia	3/44 6.82%	462/18048 2.56%	0.102359	0.250499	ENSRNOG00000020557;ENSRNOG00000011719;ENSRNOG00000011923	Ryr1;Ngb;Mgarp	3	ENSRNOG00000020557	Ryr1	1	ENSRNOG00000011719;ENSRNOG00000011923	Ngb;Mgarp	2
Biological process	GO:0042692	muscle cell differentiation	3/44 6.82%	463/18048 2.57%	0.102858	0.251143	ENSRNOG00000012609;ENSRNOG00000007250;ENSRNOG00000020557	Trdn;Six4;Ryr1	3	ENSRNOG00000012609;ENSRNOG00000020557	Trdn;Ryr1	2	ENSRNOG00000007250	Six4	1
Molecular function	GO:0030546	signaling receptor activator activity	3/40 7.5%	474/16737 2.83%	0.10345	0.222067	ENSRNOG00000013793;ENSRNOG00000027157;ENSRNOG00000010917	C1qtnf9;Ly6g6e;Bmp5	3	ENSRNOG00000010917	Bmp5	1	ENSRNOG00000013793;ENSRNOG00000027157	C1qtnf9;Ly6g6e	2
Biological process	GO:0046461	neutral lipid catabolic process	1/44 2.27%	45/18048 0.25%	0.104144	0.251977	ENSRNOG00000026855	Abhd12b	1	--	--	0	ENSRNOG00000026855	Abhd12b	1
Biological process	GO:0046464	acylglycerol catabolic process	1/44 2.27%	45/18048 0.25%	0.104144	0.251977	ENSRNOG00000026855	Abhd12b	1	--	--	0	ENSRNOG00000026855	Abhd12b	1
Biological process	GO:0071604	transforming growth factor beta production	1/44 2.27%	45/18048 0.25%	0.104144	0.251977	ENSRNOG00000014288	Fn1	1	ENSRNOG00000014288	Fn1	1	--	--	0
Biological process	GO:1904385	cellular response to angiotensin	1/44 2.27%	45/18048 0.25%	0.104144	0.251977	ENSRNOG00000014288	Fn1	1	ENSRNOG00000014288	Fn1	1	--	--	0
Molecular function	GO:0005245	voltage-gated calcium channel activity	1/40 2.5%	46/16737 0.27%	0.104359	0.222067	ENSRNOG00000020557	Ryr1	1	ENSRNOG00000020557	Ryr1	1	--	--	0
Cellular component	GO:0005891	voltage-gated calcium channel complex	1/46 2.17%	44/18303 0.24%	0.104929	0.274101	ENSRNOG00000020557	Ryr1	1	ENSRNOG00000020557	Ryr1	1	--	--	0
Biological process	GO:0051216	cartilage development	2/44 4.55%	226/18048 1.25%	0.10495	0.253351	ENSRNOG00000068029;ENSRNOG00000004210	Six2;Osr1	2	ENSRNOG00000068029;ENSRNOG00000004210	Six2;Osr1	2	--	--	0
Biological process	GO:0008207	C21-steroid hormone metabolic process	1/44 2.27%	46/18048 0.25%	0.106334	0.253821	ENSRNOG00000010917	Bmp5	1	ENSRNOG00000010917	Bmp5	1	--	--	0
Biological process	GO:0030261	chromosome condensation	1/44 2.27%	46/18048 0.25%	0.106334	0.253821	ENSRNOG00000012051	Ncaph	1	--	--	0	ENSRNOG00000012051	Ncaph	1
Biological process	GO:0051281	positive regulation of release of sequestered calcium ion into cytosol	1/44 2.27%	46/18048 0.25%	0.106334	0.253821	ENSRNOG00000012609	Trdn	1	ENSRNOG00000012609	Trdn	1	--	--	0
Biological process	GO:0085029	extracellular matrix assembly	1/44 2.27%	46/18048 0.25%	0.106334	0.253821	ENSRNOG00000053753	Thsd4	1	ENSRNOG00000053753	Thsd4	1	--	--	0
Biological process	GO:1903573	negative regulation of response to endoplasmic reticulum stress	1/44 2.27%	46/18048 0.25%	0.106334	0.253821	ENSRNOG00000005108	Wfs1	1	ENSRNOG00000005108	Wfs1	1	--	--	0
Molecular function	GO:0001228	DNA-binding transcription activator activity, RNA polymerase II-specific	3/40 7.5%	480/16737 2.87%	0.106412	0.223535	ENSRNOG00000007250;ENSRNOG00000068029;ENSRNOG00000011823	Six4;Six2;Tfap2b	3	ENSRNOG00000068029;ENSRNOG00000011823	Six2;Tfap2b	2	ENSRNOG00000007250	Six4	1
Biological process	GO:0070997	neuron death	3/44 6.82%	471/18048 2.61%	0.106884	0.254566	ENSRNOG00000005108;ENSRNOG00000007250;ENSRNOG00000011823	Wfs1;Six4;Tfap2b	3	ENSRNOG00000005108;ENSRNOG00000011823	Wfs1;Tfap2b	2	ENSRNOG00000007250	Six4	1
Cellular component	GO:0001772	immunological synapse	1/46 2.17%	45/18303 0.25%	0.107184	0.274392	ENSRNOG00000023881	Skap1	1	ENSRNOG00000023881	Skap1	1	--	--	0
Biological process	GO:0050678	regulation of epithelial cell proliferation	3/44 6.82%	472/18048 2.62%	0.107392	0.255206	ENSRNOG00000007250;ENSRNOG00000004210;ENSRNOG00000010917	Six4;Osr1;Bmp5	3	ENSRNOG00000004210;ENSRNOG00000010917	Osr1;Bmp5	2	ENSRNOG00000007250	Six4	1
Molecular function	GO:0015291	secondary active transmembrane transporter activity	2/40 5%	234/16737 1.4%	0.107492	0.223535	ENSRNOG00000068642;ENSRNOG00000015567	Slc6a20a;Slc9a2	2	ENSRNOG00000068642;ENSRNOG00000015567	Slc6a20a;Slc9a2	2	--	--	0
Biological process	GO:0055001	muscle cell development	2/44 4.55%	230/18048 1.27%	0.108058	0.255604	ENSRNOG00000007250;ENSRNOG00000020557	Six4;Ryr1	2	ENSRNOG00000020557	Ryr1	1	ENSRNOG00000007250	Six4	1
Biological process	GO:1901655	cellular response to ketone	2/44 4.55%	230/18048 1.27%	0.108058	0.255604	ENSRNOG00000014288;ENSRNOG00000046468	Fn1;Ptgfr	2	ENSRNOG00000014288;ENSRNOG00000046468	Fn1;Ptgfr	2	--	--	0
Biological process	GO:0003016	respiratory system process	1/44 2.27%	47/18048 0.26%	0.108518	0.255604	ENSRNOG00000062986	Ccbe1	1	ENSRNOG00000062986	Ccbe1	1	--	--	0
Biological process	GO:0030501	positive regulation of bone mineralization	1/44 2.27%	47/18048 0.26%	0.108518	0.255604	ENSRNOG00000004210	Osr1	1	ENSRNOG00000004210	Osr1	1	--	--	0
Biological process	GO:0060538	skeletal muscle organ development	2/44 4.55%	231/18048 1.28%	0.108838	0.255794	ENSRNOG00000007250;ENSRNOG00000020557	Six4;Ryr1	2	ENSRNOG00000020557	Ryr1	1	ENSRNOG00000007250	Six4	1
Molecular function	GO:0001216	DNA-binding transcription activator activity	3/40 7.5%	486/16737 2.9%	0.109407	0.224961	ENSRNOG00000007250;ENSRNOG00000068029;ENSRNOG00000011823	Six4;Six2;Tfap2b	3	ENSRNOG00000068029;ENSRNOG00000011823	Six2;Tfap2b	2	ENSRNOG00000007250	Six4	1
Cellular component	GO:0098636	protein complex involved in cell adhesion	1/46 2.17%	46/18303 0.25%	0.109434	0.274657	ENSRNOG00000004516	Itgbl1	1	ENSRNOG00000004516	Itgbl1	1	--	--	0
Biological process	GO:0061138	morphogenesis of a branching epithelium	2/44 4.55%	233/18048 1.29%	0.110405	0.25844	ENSRNOG00000007250;ENSRNOG00000068029	Six4;Six2	2	ENSRNOG00000068029	Six2	1	ENSRNOG00000007250	Six4	1
Biological process	GO:0010226	response to lithium ion	1/44 2.27%	48/18048 0.27%	0.110697	0.25844	ENSRNOG00000011823	Tfap2b	1	ENSRNOG00000011823	Tfap2b	1	--	--	0
Biological process	GO:1901385	regulation of voltage-gated calcium channel activity	1/44 2.27%	48/18048 0.27%	0.110697	0.25844	ENSRNOG00000029811	Kcne2	1	--	--	0	ENSRNOG00000029811	Kcne2	1
Molecular function	GO:0005044	scavenger receptor activity	1/40 2.5%	49/16737 0.29%	0.110784	0.22526	ENSRNOG00000010253	Cd163	1	ENSRNOG00000010253	Cd163	1	--	--	0
Biological process	GO:1901653	cellular response to peptide	3/44 6.82%	480/18048 2.66%	0.111488	0.25844	ENSRNOG00000013793;ENSRNOG00000014288;ENSRNOG00000011923	C1qtnf9;Fn1;Mgarp	3	ENSRNOG00000014288	Fn1	1	ENSRNOG00000013793;ENSRNOG00000011923	C1qtnf9;Mgarp	2
Cellular component	GO:0030285	integral component of synaptic vesicle membrane	1/46 2.17%	47/18303 0.26%	0.111678	0.274899	ENSRNOG00000005108	Wfs1	1	ENSRNOG00000005108	Wfs1	1	--	--	0
Biological process	GO:0008361	regulation of cell size	2/44 4.55%	235/18048 1.3%	0.111977	0.25844	ENSRNOG00000013793;ENSRNOG00000014288	C1qtnf9;Fn1	2	ENSRNOG00000014288	Fn1	1	ENSRNOG00000013793	C1qtnf9	1
Biological process	GO:0009952	anterior/posterior pattern specification	2/44 4.55%	235/18048 1.3%	0.111977	0.25844	ENSRNOG00000068029;ENSRNOG00000004210	Six2;Osr1	2	ENSRNOG00000068029;ENSRNOG00000004210	Six2;Osr1	2	--	--	0
Biological process	GO:0051651	maintenance of location in cell	2/44 4.55%	235/18048 1.3%	0.111977	0.25844	ENSRNOG00000012609;ENSRNOG00000020557	Trdn;Ryr1	2	ENSRNOG00000012609;ENSRNOG00000020557	Trdn;Ryr1	2	--	--	0
Biological process	GO:0046661	male sex differentiation	2/44 4.55%	236/18048 1.31%	0.112766	0.25844	ENSRNOG00000007250;ENSRNOG00000010917	Six4;Bmp5	2	ENSRNOG00000010917	Bmp5	1	ENSRNOG00000007250	Six4	1
Biological process	GO:0014904	myotube cell development	1/44 2.27%	49/18048 0.27%	0.112871	0.25844	ENSRNOG00000020557	Ryr1	1	ENSRNOG00000020557	Ryr1	1	--	--	0
Biological process	GO:0035987	endodermal cell differentiation	1/44 2.27%	49/18048 0.27%	0.112871	0.25844	ENSRNOG00000014288	Fn1	1	ENSRNOG00000014288	Fn1	1	--	--	0
Biological process	GO:0038084	vascular endothelial growth factor signaling pathway	1/44 2.27%	49/18048 0.27%	0.112871	0.25844	ENSRNOG00000062986	Ccbe1	1	ENSRNOG00000062986	Ccbe1	1	--	--	0
Biological process	GO:0046148	pigment biosynthetic process	1/44 2.27%	49/18048 0.27%	0.112871	0.25844	ENSRNOG00000014465	Oca2	1	--	--	0	ENSRNOG00000014465	Oca2	1
Molecular function	GO:0051879	Hsp90 protein binding	1/40 2.5%	50/16737 0.3%	0.112915	0.227071	ENSRNOG00000052061	Ppef2	1	--	--	0	ENSRNOG00000052061	Ppef2	1
Biological process	GO:1901617	organic hydroxy compound biosynthetic process	2/44 4.55%	238/18048 1.32%	0.114347	0.260609	ENSRNOG00000014465;ENSRNOG00000010917	Oca2;Bmp5	2	ENSRNOG00000010917	Bmp5	1	ENSRNOG00000014465	Oca2	1
Biological process	GO:0010799	regulation of peptidyl-threonine phosphorylation	1/44 2.27%	50/18048 0.28%	0.115039	0.260609	ENSRNOG00000052061	Ppef2	1	--	--	0	ENSRNOG00000052061	Ppef2	1
Biological process	GO:0033628	regulation of cell adhesion mediated by integrin	1/44 2.27%	50/18048 0.28%	0.115039	0.260609	ENSRNOG00000023881	Skap1	1	ENSRNOG00000023881	Skap1	1	--	--	0
Biological process	GO:0089718	amino acid import across plasma membrane	1/44 2.27%	50/18048 0.28%	0.115039	0.260609	ENSRNOG00000068642	Slc6a20a	1	ENSRNOG00000068642	Slc6a20a	1	--	--	0
Biological process	GO:1990573	potassium ion import across plasma membrane	1/44 2.27%	50/18048 0.28%	0.115039	0.260609	ENSRNOG00000029811	Kcne2	1	--	--	0	ENSRNOG00000029811	Kcne2	1
Biological process	GO:0002768	immune response-regulating cell surface receptor signaling pathway	2/44 4.55%	240/18048 1.33%	0.115935	0.262082	ENSRNOG00000022975;ENSRNOG00000023881	Nfam1;Skap1	2	ENSRNOG00000022975;ENSRNOG00000023881	Nfam1;Skap1	2	--	--	0
Molecular function	GO:0015459	potassium channel regulator activity	1/40 2.5%	52/16737 0.31%	0.117163	0.232214	ENSRNOG00000029811	Kcne2	1	--	--	0	ENSRNOG00000029811	Kcne2	1
Biological process	GO:0008089	anterograde axonal transport	1/44 2.27%	51/18048 0.28%	0.117203	0.262171	ENSRNOG00000011923	Mgarp	1	--	--	0	ENSRNOG00000011923	Mgarp	1
Biological process	GO:0010862	positive regulation of pathway-restricted SMAD protein phosphorylation	1/44 2.27%	51/18048 0.28%	0.117203	0.262171	ENSRNOG00000010917	Bmp5	1	ENSRNOG00000010917	Bmp5	1	--	--	0
Biological process	GO:0032350	regulation of hormone metabolic process	1/44 2.27%	51/18048 0.28%	0.117203	0.262171	ENSRNOG00000010917	Bmp5	1	ENSRNOG00000010917	Bmp5	1	--	--	0
Biological process	GO:0071312	cellular response to alkaloid	1/44 2.27%	51/18048 0.28%	0.117203	0.262171	ENSRNOG00000020557	Ryr1	1	ENSRNOG00000020557	Ryr1	1	--	--	0
Biological process	GO:1901031	regulation of response to reactive oxygen species	1/44 2.27%	51/18048 0.28%	0.117203	0.262171	ENSRNOG00000011719	Ngb	1	--	--	0	ENSRNOG00000011719	Ngb	1
Biological process	GO:0036293	response to decreased oxygen levels	3/44 6.82%	492/18048 2.73%	0.117746	0.262835	ENSRNOG00000020557;ENSRNOG00000011719;ENSRNOG00000011923	Ryr1;Ngb;Mgarp	3	ENSRNOG00000020557	Ryr1	1	ENSRNOG00000011719;ENSRNOG00000011923	Ngb;Mgarp	2
Molecular function	GO:0022853	active ion transmembrane transporter activity	2/40 5%	249/16737 1.49%	0.119112	0.232214	ENSRNOG00000068642;ENSRNOG00000015567	Slc6a20a;Slc9a2	2	ENSRNOG00000068642;ENSRNOG00000015567	Slc6a20a;Slc9a2	2	--	--	0
Biological process	GO:0010810	regulation of cell-substrate adhesion	2/44 4.55%	244/18048 1.35%	0.119127	0.262994	ENSRNOG00000014288;ENSRNOG00000023881	Fn1;Skap1	2	ENSRNOG00000014288;ENSRNOG00000023881	Fn1;Skap1	2	--	--	0
Molecular function	GO:0016790	thiolester hydrolase activity	1/40 2.5%	53/16737 0.32%	0.119279	0.232214	ENSRNOG00000026855	Abhd12b	1	--	--	0	ENSRNOG00000026855	Abhd12b	1
Biological process	GO:0003197	endocardial cushion development	1/44 2.27%	52/18048 0.29%	0.119361	0.262994	ENSRNOG00000010917	Bmp5	1	ENSRNOG00000010917	Bmp5	1	--	--	0
Biological process	GO:0043267	negative regulation of potassium ion transport	1/44 2.27%	52/18048 0.29%	0.119361	0.262994	ENSRNOG00000029811	Kcne2	1	--	--	0	ENSRNOG00000029811	Kcne2	1
Biological process	GO:0045214	sarcomere organization	1/44 2.27%	52/18048 0.29%	0.119361	0.262994	ENSRNOG00000007250	Six4	1	--	--	0	ENSRNOG00000007250	Six4	1
Biological process	GO:0046189	phenol-containing compound biosynthetic process	1/44 2.27%	52/18048 0.29%	0.119361	0.262994	ENSRNOG00000014465	Oca2	1	--	--	0	ENSRNOG00000014465	Oca2	1
Biological process	GO:0051646	mitochondrion localization	1/44 2.27%	52/18048 0.29%	0.119361	0.262994	ENSRNOG00000011923	Mgarp	1	--	--	0	ENSRNOG00000011923	Mgarp	1
Biological process	GO:0007605	sensory perception of sound	2/44 4.55%	245/18048 1.36%	0.119928	0.262994	ENSRNOG00000005108;ENSRNOG00000061215	Wfs1;Crym	2	ENSRNOG00000005108;ENSRNOG00000061215	Wfs1;Crym	2	--	--	0
Biological process	GO:0042445	hormone metabolic process	2/44 4.55%	246/18048 1.36%	0.120731	0.262994	ENSRNOG00000061215;ENSRNOG00000010917	Crym;Bmp5	2	ENSRNOG00000061215;ENSRNOG00000010917	Crym;Bmp5	2	--	--	0
Biological process	GO:0007389	pattern specification process	3/44 6.82%	498/18048 2.76%	0.120925	0.262994	ENSRNOG00000068029;ENSRNOG00000004210;ENSRNOG00000010917	Six2;Osr1;Bmp5	3	ENSRNOG00000068029;ENSRNOG00000004210;ENSRNOG00000010917	Six2;Osr1;Bmp5	3	--	--	0
Molecular function	GO:0030544	Hsp70 protein binding	1/40 2.5%	54/16737 0.32%	0.121391	0.233837	ENSRNOG00000052061	Ppef2	1	--	--	0	ENSRNOG00000052061	Ppef2	1
Biological process	GO:0042391	regulation of membrane potential	3/44 6.82%	499/18048 2.76%	0.121458	0.262994	ENSRNOG00000012609;ENSRNOG00000029811;ENSRNOG00000013829	Trdn;Kcne2;Chrna3	3	ENSRNOG00000012609	Trdn	1	ENSRNOG00000029811;ENSRNOG00000013829	Kcne2;Chrna3	2
Biological process	GO:0009395	phospholipid catabolic process	1/44 2.27%	53/18048 0.29%	0.121514	0.262994	ENSRNOG00000026855	Abhd12b	1	--	--	0	ENSRNOG00000026855	Abhd12b	1
Biological process	GO:0042181	ketone biosynthetic process	1/44 2.27%	53/18048 0.29%	0.121514	0.262994	ENSRNOG00000010917	Bmp5	1	ENSRNOG00000010917	Bmp5	1	--	--	0
Biological process	GO:0043277	apoptotic cell clearance	1/44 2.27%	53/18048 0.29%	0.121514	0.262994	ENSRNOG00000017510	Mfge8	1	ENSRNOG00000017510	Mfge8	1	--	--	0
Biological process	GO:0048806	genitalia development	1/44 2.27%	53/18048 0.29%	0.121514	0.262994	ENSRNOG00000010917	Bmp5	1	ENSRNOG00000010917	Bmp5	1	--	--	0
Biological process	GO:0086009	membrane repolarization	1/44 2.27%	53/18048 0.29%	0.121514	0.262994	ENSRNOG00000029811	Kcne2	1	--	--	0	ENSRNOG00000029811	Kcne2	1
Biological process	GO:0060047	heart contraction	2/44 4.55%	248/18048 1.37%	0.122341	0.263369	ENSRNOG00000012609;ENSRNOG00000029811	Trdn;Kcne2	2	ENSRNOG00000012609	Trdn	1	ENSRNOG00000029811	Kcne2	1
Biological process	GO:0006953	acute-phase response	1/44 2.27%	54/18048 0.3%	0.123662	0.263369	ENSRNOG00000014288	Fn1	1	ENSRNOG00000014288	Fn1	1	--	--	0
Biological process	GO:0010574	regulation of vascular endothelial growth factor production	1/44 2.27%	54/18048 0.3%	0.123662	0.263369	ENSRNOG00000062986	Ccbe1	1	ENSRNOG00000062986	Ccbe1	1	--	--	0
Biological process	GO:0015804	neutral amino acid transport	1/44 2.27%	54/18048 0.3%	0.123662	0.263369	ENSRNOG00000068642	Slc6a20a	1	ENSRNOG00000068642	Slc6a20a	1	--	--	0
Biological process	GO:0048066	developmental pigmentation	1/44 2.27%	54/18048 0.3%	0.123662	0.263369	ENSRNOG00000014465	Oca2	1	--	--	0	ENSRNOG00000014465	Oca2	1
Biological process	GO:0055081	anion homeostasis	1/44 2.27%	54/18048 0.3%	0.123662	0.263369	ENSRNOG00000011823	Tfap2b	1	ENSRNOG00000011823	Tfap2b	1	--	--	0
Biological process	GO:1904646	cellular response to amyloid-beta	1/44 2.27%	54/18048 0.3%	0.123662	0.263369	ENSRNOG00000014288	Fn1	1	ENSRNOG00000014288	Fn1	1	--	--	0
Biological process	GO:1990776	response to angiotensin	1/44 2.27%	54/18048 0.3%	0.123662	0.263369	ENSRNOG00000014288	Fn1	1	ENSRNOG00000014288	Fn1	1	--	--	0
Molecular function	GO:0005231	excitatory extracellular ligand-gated ion channel activity	1/40 2.5%	56/16737 0.33%	0.125599	0.238148	ENSRNOG00000013829	Chrna3	1	--	--	0	ENSRNOG00000013829	Chrna3	1
Biological process	GO:0007588	excretion	1/44 2.27%	55/18048 0.3%	0.125805	0.266338	ENSRNOG00000013829	Chrna3	1	--	--	0	ENSRNOG00000013829	Chrna3	1
Biological process	GO:0032330	regulation of chondrocyte differentiation	1/44 2.27%	55/18048 0.3%	0.125805	0.266338	ENSRNOG00000068029	Six2	1	ENSRNOG00000068029	Six2	1	--	--	0
Biological process	GO:1902930	regulation of alcohol biosynthetic process	1/44 2.27%	55/18048 0.3%	0.125805	0.266338	ENSRNOG00000010917	Bmp5	1	ENSRNOG00000010917	Bmp5	1	--	--	0
Molecular function	GO:0030246	carbohydrate binding	2/40 5%	258/16737 1.54%	0.126231	0.238148	ENSRNOG00000030522;ENSRNOG00000059890	LOC500331;Clec2d2	2	ENSRNOG00000059890	Clec2d2	1	ENSRNOG00000030522	LOC500331	1
Biological process	GO:0001763	morphogenesis of a branching structure	2/44 4.55%	253/18048 1.4%	0.126389	0.267044	ENSRNOG00000007250;ENSRNOG00000068029	Six4;Six2	2	ENSRNOG00000068029	Six2	1	ENSRNOG00000007250	Six4	1
Biological process	GO:0050853	B cell receptor signaling pathway	1/44 2.27%	56/18048 0.31%	0.127943	0.269793	ENSRNOG00000022975	Nfam1	1	ENSRNOG00000022975	Nfam1	1	--	--	0
Biological process	GO:0071248	cellular response to metal ion	2/44 4.55%	257/18048 1.42%	0.129651	0.272139	ENSRNOG00000014288;ENSRNOG00000020557	Fn1;Ryr1	2	ENSRNOG00000014288;ENSRNOG00000020557	Fn1;Ryr1	2	--	--	0
Biological process	GO:0048546	digestive tract morphogenesis	1/44 2.27%	57/18048 0.32%	0.130076	0.272139	ENSRNOG00000068029	Six2	1	ENSRNOG00000068029	Six2	1	--	--	0
Biological process	GO:0061383	trabecula morphogenesis	1/44 2.27%	57/18048 0.32%	0.130076	0.272139	ENSRNOG00000010917	Bmp5	1	ENSRNOG00000010917	Bmp5	1	--	--	0
Biological process	GO:0070169	positive regulation of biomineral tissue development	1/44 2.27%	57/18048 0.32%	0.130076	0.272139	ENSRNOG00000004210	Osr1	1	ENSRNOG00000004210	Osr1	1	--	--	0
Cellular component	GO:0062023	collagen-containing extracellular matrix	2/46 4.35%	250/18303 1.37%	0.130278	0.314634	ENSRNOG00000014288;ENSRNOG00000014021	Fn1;Matn4	2	ENSRNOG00000014288	Fn1	1	ENSRNOG00000014021	Matn4	1
Biological process	GO:0050679	positive regulation of epithelial cell proliferation	2/44 4.55%	259/18048 1.44%	0.13129	0.273374	ENSRNOG00000004210;ENSRNOG00000010917	Osr1;Bmp5	2	ENSRNOG00000004210;ENSRNOG00000010917	Osr1;Bmp5	2	--	--	0
Biological process	GO:0051259	protein complex oligomerization	2/44 4.55%	259/18048 1.44%	0.13129	0.273374	ENSRNOG00000020557;ENSRNOG00000004535	Ryr1;Kcng3	2	ENSRNOG00000020557;ENSRNOG00000004535	Ryr1;Kcng3	2	--	--	0
Molecular function	GO:1904315	transmitter-gated ion channel activity involved in regulation of postsynaptic membrane potential	1/40 2.5%	59/16737 0.35%	0.131875	0.245373	ENSRNOG00000013829	Chrna3	1	--	--	0	ENSRNOG00000013829	Chrna3	1
Biological process	GO:0010573	vascular endothelial growth factor production	1/44 2.27%	58/18048 0.32%	0.132203	0.273374	ENSRNOG00000062986	Ccbe1	1	ENSRNOG00000062986	Ccbe1	1	--	--	0
Biological process	GO:0032965	regulation of collagen biosynthetic process	1/44 2.27%	58/18048 0.32%	0.132203	0.273374	ENSRNOG00000014288	Fn1	1	ENSRNOG00000014288	Fn1	1	--	--	0
Biological process	GO:0045773	positive regulation of axon extension	1/44 2.27%	58/18048 0.32%	0.132203	0.273374	ENSRNOG00000014288	Fn1	1	ENSRNOG00000014288	Fn1	1	--	--	0
Biological process	GO:0110151	positive regulation of biomineralization	1/44 2.27%	58/18048 0.32%	0.132203	0.273374	ENSRNOG00000004210	Osr1	1	ENSRNOG00000004210	Osr1	1	--	--	0
Biological process	GO:0032355	response to estradiol	2/44 4.55%	261/18048 1.45%	0.132934	0.274044	ENSRNOG00000020557;ENSRNOG00000046468	Ryr1;Ptgfr	2	ENSRNOG00000020557;ENSRNOG00000046468	Ryr1;Ptgfr	2	--	--	0
Biological process	GO:0003015	heart process	2/44 4.55%	262/18048 1.45%	0.133757	0.274044	ENSRNOG00000012609;ENSRNOG00000029811	Trdn;Kcne2	2	ENSRNOG00000012609	Trdn	1	ENSRNOG00000029811	Kcne2	1
Biological process	GO:0001706	endoderm formation	1/44 2.27%	59/18048 0.33%	0.134326	0.274044	ENSRNOG00000014288	Fn1	1	ENSRNOG00000014288	Fn1	1	--	--	0
Biological process	GO:0031018	endocrine pancreas development	1/44 2.27%	59/18048 0.33%	0.134326	0.274044	ENSRNOG00000010917	Bmp5	1	ENSRNOG00000010917	Bmp5	1	--	--	0
Biological process	GO:0048538	thymus development	1/44 2.27%	59/18048 0.33%	0.134326	0.274044	ENSRNOG00000007250	Six4	1	--	--	0	ENSRNOG00000007250	Six4	1
Biological process	GO:0051289	protein homotetramerization	1/44 2.27%	59/18048 0.33%	0.134326	0.274044	ENSRNOG00000020557	Ryr1	1	ENSRNOG00000020557	Ryr1	1	--	--	0
Biological process	GO:1903170	negative regulation of calcium ion transmembrane transport	1/44 2.27%	59/18048 0.33%	0.134326	0.274044	ENSRNOG00000012609	Trdn	1	ENSRNOG00000012609	Trdn	1	--	--	0
Biological process	GO:0016485	protein processing	2/44 4.55%	263/18048 1.46%	0.134582	0.274044	ENSRNOG00000062986;ENSRNOG00000008947	Ccbe1;Cpz	2	ENSRNOG00000062986;ENSRNOG00000008947	Ccbe1;Cpz	2	--	--	0
Molecular function	GO:0016791	phosphatase activity	2/40 5%	270/16737 1.61%	0.135881	0.245373	ENSRNOG00000052061;ENSRNOG00000003407	Ppef2;Ptpn14	2	ENSRNOG00000003407	Ptpn14	1	ENSRNOG00000052061	Ppef2	1
Molecular function	GO:0022824	transmitter-gated ion channel activity	1/40 2.5%	61/16737 0.36%	0.136034	0.245373	ENSRNOG00000013829	Chrna3	1	--	--	0	ENSRNOG00000013829	Chrna3	1
Molecular function	GO:0022835	transmitter-gated channel activity	1/40 2.5%	61/16737 0.36%	0.136034	0.245373	ENSRNOG00000013829	Chrna3	1	--	--	0	ENSRNOG00000013829	Chrna3	1
Biological process	GO:0009948	anterior/posterior axis specification	1/44 2.27%	60/18048 0.33%	0.136443	0.276777	ENSRNOG00000068029	Six2	1	ENSRNOG00000068029	Six2	1	--	--	0
Biological process	GO:1903202	negative regulation of oxidative stress-induced cell death	1/44 2.27%	60/18048 0.33%	0.136443	0.276777	ENSRNOG00000011719	Ngb	1	--	--	0	ENSRNOG00000011719	Ngb	1
Molecular function	GO:0008235	metalloexopeptidase activity	1/40 2.5%	62/16737 0.37%	0.138106	0.245373	ENSRNOG00000008947	Cpz	1	ENSRNOG00000008947	Cpz	1	--	--	0
Molecular function	GO:0099529	neurotransmitter receptor activity involved in regulation of postsynaptic membrane potential	1/40 2.5%	62/16737 0.37%	0.138106	0.245373	ENSRNOG00000013829	Chrna3	1	--	--	0	ENSRNOG00000013829	Chrna3	1
Biological process	GO:0002066	columnar/cuboidal epithelial cell development	1/44 2.27%	61/18048 0.34%	0.138555	0.279997	ENSRNOG00000010917	Bmp5	1	ENSRNOG00000010917	Bmp5	1	--	--	0
Biological process	GO:0060711	labyrinthine layer development	1/44 2.27%	61/18048 0.34%	0.138555	0.279997	ENSRNOG00000010917	Bmp5	1	ENSRNOG00000010917	Bmp5	1	--	--	0
Biological process	GO:0090092	regulation of transmembrane receptor protein serine/threonine kinase signaling pathway	2/44 4.55%	269/18048 1.49%	0.139555	0.281485	ENSRNOG00000011823;ENSRNOG00000010917	Tfap2b;Bmp5	2	ENSRNOG00000011823;ENSRNOG00000010917	Tfap2b;Bmp5	2	--	--	0
Molecular function	GO:0030145	manganese ion binding	1/40 2.5%	63/16737 0.38%	0.140174	0.246652	ENSRNOG00000052061	Ppef2	1	--	--	0	ENSRNOG00000052061	Ppef2	1
Biological process	GO:0007528	neuromuscular junction development	1/44 2.27%	62/18048 0.34%	0.140663	0.28265	ENSRNOG00000007250	Six4	1	--	--	0	ENSRNOG00000007250	Six4	1
Biological process	GO:0034113	heterotypic cell-cell adhesion	1/44 2.27%	62/18048 0.34%	0.140663	0.28265	ENSRNOG00000023881	Skap1	1	ENSRNOG00000023881	Skap1	1	--	--	0
Biological process	GO:0001755	neural crest cell migration	1/44 2.27%	63/18048 0.35%	0.142765	0.284729	ENSRNOG00000014288	Fn1	1	ENSRNOG00000014288	Fn1	1	--	--	0
Biological process	GO:0031122	cytoplasmic microtubule organization	1/44 2.27%	63/18048 0.35%	0.142765	0.284729	ENSRNOG00000012609	Trdn	1	ENSRNOG00000012609	Trdn	1	--	--	0
Biological process	GO:0033280	response to vitamin D	1/44 2.27%	63/18048 0.35%	0.142765	0.284729	ENSRNOG00000061215	Crym	1	ENSRNOG00000061215	Crym	1	--	--	0
Biological process	GO:1904645	response to amyloid-beta	1/44 2.27%	63/18048 0.35%	0.142765	0.284729	ENSRNOG00000014288	Fn1	1	ENSRNOG00000014288	Fn1	1	--	--	0
Molecular function	GO:0001786	phosphatidylserine binding	1/40 2.5%	65/16737 0.39%	0.144294	0.246784	ENSRNOG00000017510	Mfge8	1	ENSRNOG00000017510	Mfge8	1	--	--	0
Molecular function	GO:0015179	L-amino acid transmembrane transporter activity	1/40 2.5%	65/16737 0.39%	0.144294	0.246784	ENSRNOG00000068642	Slc6a20a	1	ENSRNOG00000068642	Slc6a20a	1	--	--	0
Molecular function	GO:0017018	myosin phosphatase activity	1/40 2.5%	65/16737 0.39%	0.144294	0.246784	ENSRNOG00000052061	Ppef2	1	--	--	0	ENSRNOG00000052061	Ppef2	1
Biological process	GO:0019748	secondary metabolic process	1/44 2.27%	64/18048 0.35%	0.144862	0.286768	ENSRNOG00000014465	Oca2	1	--	--	0	ENSRNOG00000014465	Oca2	1
Biological process	GO:0045778	positive regulation of ossification	1/44 2.27%	64/18048 0.35%	0.144862	0.286768	ENSRNOG00000004210	Osr1	1	ENSRNOG00000004210	Osr1	1	--	--	0
Biological process	GO:0055078	sodium ion homeostasis	1/44 2.27%	64/18048 0.35%	0.144862	0.286768	ENSRNOG00000011823	Tfap2b	1	ENSRNOG00000011823	Tfap2b	1	--	--	0
Biological process	GO:2000649	regulation of sodium ion transmembrane transporter activity	1/44 2.27%	64/18048 0.35%	0.144862	0.286768	ENSRNOG00000004210	Osr1	1	ENSRNOG00000004210	Osr1	1	--	--	0
Biological process	GO:0002011	morphogenesis of an epithelial sheet	1/44 2.27%	65/18048 0.36%	0.146954	0.287572	ENSRNOG00000010917	Bmp5	1	ENSRNOG00000010917	Bmp5	1	--	--	0
Biological process	GO:0006611	protein export from nucleus	1/44 2.27%	65/18048 0.36%	0.146954	0.287572	ENSRNOG00000003407	Ptpn14	1	ENSRNOG00000003407	Ptpn14	1	--	--	0
Biological process	GO:0051055	negative regulation of lipid biosynthetic process	1/44 2.27%	65/18048 0.36%	0.146954	0.287572	ENSRNOG00000010917	Bmp5	1	ENSRNOG00000010917	Bmp5	1	--	--	0
Biological process	GO:0060393	regulation of pathway-restricted SMAD protein phosphorylation	1/44 2.27%	65/18048 0.36%	0.146954	0.287572	ENSRNOG00000010917	Bmp5	1	ENSRNOG00000010917	Bmp5	1	--	--	0
Biological process	GO:0090497	mesenchymal cell migration	1/44 2.27%	65/18048 0.36%	0.146954	0.287572	ENSRNOG00000014288	Fn1	1	ENSRNOG00000014288	Fn1	1	--	--	0
Biological process	GO:0097009	energy homeostasis	1/44 2.27%	65/18048 0.36%	0.146954	0.287572	ENSRNOG00000013793	C1qtnf9	1	--	--	0	ENSRNOG00000013793	C1qtnf9	1
Biological process	GO:0048863	stem cell differentiation	2/44 4.55%	279/18048 1.55%	0.147934	0.287572	ENSRNOG00000014288;ENSRNOG00000004210	Fn1;Osr1	2	ENSRNOG00000014288;ENSRNOG00000004210	Fn1;Osr1	2	--	--	0
Biological process	GO:0010712	regulation of collagen metabolic process	1/44 2.27%	66/18048 0.37%	0.149041	0.287572	ENSRNOG00000014288	Fn1	1	ENSRNOG00000014288	Fn1	1	--	--	0
Biological process	GO:0042440	pigment metabolic process	1/44 2.27%	66/18048 0.37%	0.149041	0.287572	ENSRNOG00000014465	Oca2	1	--	--	0	ENSRNOG00000014465	Oca2	1
Biological process	GO:0050854	regulation of antigen receptor-mediated signaling pathway	1/44 2.27%	66/18048 0.37%	0.149041	0.287572	ENSRNOG00000022975	Nfam1	1	ENSRNOG00000022975	Nfam1	1	--	--	0
Biological process	GO:0070059	intrinsic apoptotic signaling pathway in response to endoplasmic reticulum stress	1/44 2.27%	66/18048 0.37%	0.149041	0.287572	ENSRNOG00000005108	Wfs1	1	ENSRNOG00000005108	Wfs1	1	--	--	0
Biological process	GO:0086001	cardiac muscle cell action potential	1/44 2.27%	66/18048 0.37%	0.149041	0.287572	ENSRNOG00000029811	Kcne2	1	--	--	0	ENSRNOG00000029811	Kcne2	1
Biological process	GO:0098930	axonal transport	1/44 2.27%	66/18048 0.37%	0.149041	0.287572	ENSRNOG00000011923	Mgarp	1	--	--	0	ENSRNOG00000011923	Mgarp	1
Biological process	GO:2001258	negative regulation of cation channel activity	1/44 2.27%	66/18048 0.37%	0.149041	0.287572	ENSRNOG00000029811	Kcne2	1	--	--	0	ENSRNOG00000029811	Kcne2	1
Biological process	GO:0050954	sensory perception of mechanical stimulus	2/44 4.55%	281/18048 1.56%	0.149622	0.288172	ENSRNOG00000005108;ENSRNOG00000061215	Wfs1;Crym	2	ENSRNOG00000005108;ENSRNOG00000061215	Wfs1;Crym	2	--	--	0
Biological process	GO:0032964	collagen biosynthetic process	1/44 2.27%	67/18048 0.37%	0.151124	0.290539	ENSRNOG00000014288	Fn1	1	ENSRNOG00000014288	Fn1	1	--	--	0
Molecular function	GO:0016597	amino acid binding	1/40 2.5%	69/16737 0.41%	0.152478	0.258365	ENSRNOG00000003620	Fmo3	1	ENSRNOG00000003620	Fmo3	1	--	--	0
Biological process	GO:0003007	heart morphogenesis	2/44 4.55%	285/18048 1.58%	0.153011	0.293638	ENSRNOG00000020557;ENSRNOG00000010917	Ryr1;Bmp5	2	ENSRNOG00000020557;ENSRNOG00000010917	Ryr1;Bmp5	2	--	--	0
Biological process	GO:1903522	regulation of blood circulation	2/44 4.55%	286/18048 1.58%	0.153861	0.294739	ENSRNOG00000012609;ENSRNOG00000029811	Trdn;Kcne2	2	ENSRNOG00000012609	Trdn	1	ENSRNOG00000029811	Kcne2	1
Molecular function	GO:0005230	extracellular ligand-gated ion channel activity	1/40 2.5%	70/16737 0.42%	0.154512	0.259409	ENSRNOG00000013829	Chrna3	1	--	--	0	ENSRNOG00000013829	Chrna3	1
Biological process	GO:0034764	positive regulation of transmembrane transport	2/44 4.55%	287/18048 1.59%	0.154712	0.295323	ENSRNOG00000012609;ENSRNOG00000029811	Trdn;Kcne2	2	ENSRNOG00000012609	Trdn	1	ENSRNOG00000029811	Kcne2	1
Biological process	GO:0042446	hormone biosynthetic process	1/44 2.27%	69/18048 0.38%	0.155273	0.295323	ENSRNOG00000010917	Bmp5	1	ENSRNOG00000010917	Bmp5	1	--	--	0
Biological process	GO:0051480	regulation of cytosolic calcium ion concentration	1/44 2.27%	69/18048 0.38%	0.155273	0.295323	ENSRNOG00000020557	Ryr1	1	ENSRNOG00000020557	Ryr1	1	--	--	0
Biological process	GO:0060389	pathway-restricted SMAD protein phosphorylation	1/44 2.27%	69/18048 0.38%	0.155273	0.295323	ENSRNOG00000010917	Bmp5	1	ENSRNOG00000010917	Bmp5	1	--	--	0
Cellular component	GO:0098563	intrinsic component of synaptic vesicle membrane	1/46 2.17%	67/18303 0.37%	0.155411	0.361683	ENSRNOG00000005108	Wfs1	1	ENSRNOG00000005108	Wfs1	1	--	--	0
Cellular component	GO:1904115	axon cytoplasm	1/46 2.17%	67/18303 0.37%	0.155411	0.361683	ENSRNOG00000011923	Mgarp	1	--	--	0	ENSRNOG00000011923	Mgarp	1
Biological process	GO:0000302	response to reactive oxygen species	2/44 4.55%	289/18048 1.6%	0.156416	0.296967	ENSRNOG00000014288;ENSRNOG00000011719	Fn1;Ngb	2	ENSRNOG00000014288	Fn1	1	ENSRNOG00000011719	Ngb	1
Molecular function	GO:0015370	solute:sodium symporter activity	1/40 2.5%	71/16737 0.42%	0.156541	0.260427	ENSRNOG00000068642	Slc6a20a	1	ENSRNOG00000068642	Slc6a20a	1	--	--	0
Biological process	GO:0006081	cellular aldehyde metabolic process	1/44 2.27%	70/18048 0.39%	0.15734	0.297664	ENSRNOG00000010917	Bmp5	1	ENSRNOG00000010917	Bmp5	1	--	--	0
Biological process	GO:0046503	glycerolipid catabolic process	1/44 2.27%	70/18048 0.39%	0.15734	0.297664	ENSRNOG00000026855	Abhd12b	1	--	--	0	ENSRNOG00000026855	Abhd12b	1
Molecular function	GO:0005201	extracellular matrix structural constituent	1/40 2.5%	72/16737 0.43%	0.158565	0.261418	ENSRNOG00000014288	Fn1	1	ENSRNOG00000014288	Fn1	1	--	--	0
Biological process	GO:0060560	developmental growth involved in morphogenesis	2/44 4.55%	292/18048 1.62%	0.158979	0.29997	ENSRNOG00000014288;ENSRNOG00000007250	Fn1;Six4	2	ENSRNOG00000014288	Fn1	1	ENSRNOG00000007250	Six4	1
Biological process	GO:0001954	positive regulation of cell-matrix adhesion	1/44 2.27%	71/18048 0.39%	0.159403	0.29997	ENSRNOG00000023881	Skap1	1	ENSRNOG00000023881	Skap1	1	--	--	0
Biological process	GO:0042733	embryonic digit morphogenesis	1/44 2.27%	71/18048 0.39%	0.159403	0.29997	ENSRNOG00000004210	Osr1	1	ENSRNOG00000004210	Osr1	1	--	--	0
Biological process	GO:0006911	phagocytosis, engulfment	1/44 2.27%	72/18048 0.4%	0.16146	0.30066	ENSRNOG00000017510	Mfge8	1	ENSRNOG00000017510	Mfge8	1	--	--	0
Biological process	GO:0009064	glutamine family amino acid metabolic process	1/44 2.27%	72/18048 0.4%	0.16146	0.30066	ENSRNOG00000001261	Ftcd	1	--	--	0	ENSRNOG00000001261	Ftcd	1
Biological process	GO:0015695	organic cation transport	1/44 2.27%	72/18048 0.4%	0.16146	0.30066	ENSRNOG00000013829	Chrna3	1	--	--	0	ENSRNOG00000013829	Chrna3	1
Biological process	GO:0030968	endoplasmic reticulum unfolded protein response	1/44 2.27%	72/18048 0.4%	0.16146	0.30066	ENSRNOG00000005108	Wfs1	1	ENSRNOG00000005108	Wfs1	1	--	--	0
Biological process	GO:0050994	regulation of lipid catabolic process	1/44 2.27%	72/18048 0.4%	0.16146	0.30066	ENSRNOG00000026661	Hcar1	1	ENSRNOG00000026661	Hcar1	1	--	--	0
Biological process	GO:0086003	cardiac muscle cell contraction	1/44 2.27%	72/18048 0.4%	0.16146	0.30066	ENSRNOG00000029811	Kcne2	1	--	--	0	ENSRNOG00000029811	Kcne2	1
Biological process	GO:0030239	myofibril assembly	1/44 2.27%	73/18048 0.4%	0.163513	0.301848	ENSRNOG00000007250	Six4	1	--	--	0	ENSRNOG00000007250	Six4	1
Biological process	GO:0035904	aorta development	1/44 2.27%	73/18048 0.4%	0.163513	0.301848	ENSRNOG00000011823	Tfap2b	1	ENSRNOG00000011823	Tfap2b	1	--	--	0
Biological process	GO:0051453	regulation of intracellular pH	1/44 2.27%	73/18048 0.4%	0.163513	0.301848	ENSRNOG00000015567	Slc9a2	1	ENSRNOG00000015567	Slc9a2	1	--	--	0
Biological process	GO:0070613	regulation of protein processing	1/44 2.27%	73/18048 0.4%	0.163513	0.301848	ENSRNOG00000062986	Ccbe1	1	ENSRNOG00000062986	Ccbe1	1	--	--	0
Biological process	GO:1902305	regulation of sodium ion transmembrane transport	1/44 2.27%	73/18048 0.4%	0.163513	0.301848	ENSRNOG00000004210	Osr1	1	ENSRNOG00000004210	Osr1	1	--	--	0
Cellular component	GO:0030315	T-tubule	1/46 2.17%	71/18303 0.39%	0.163901	0.374631	ENSRNOG00000020557	Ryr1	1	ENSRNOG00000020557	Ryr1	1	--	--	0
Molecular function	GO:0005518	collagen binding	1/40 2.5%	75/16737 0.45%	0.16461	0.267462	ENSRNOG00000062986	Ccbe1	1	ENSRNOG00000062986	Ccbe1	1	--	--	0
Biological process	GO:0002253	activation of immune response	2/44 4.55%	299/18048 1.66%	0.164991	0.301971	ENSRNOG00000022975;ENSRNOG00000023881	Nfam1;Skap1	2	ENSRNOG00000022975;ENSRNOG00000023881	Nfam1;Skap1	2	--	--	0
Biological process	GO:0006826	iron ion transport	1/44 2.27%	74/18048 0.41%	0.16556	0.301971	ENSRNOG00000009434	Inhca	1	ENSRNOG00000009434	Inhca	1	--	--	0
Biological process	GO:0006940	regulation of smooth muscle contraction	1/44 2.27%	74/18048 0.41%	0.16556	0.301971	ENSRNOG00000013829	Chrna3	1	--	--	0	ENSRNOG00000013829	Chrna3	1
Biological process	GO:0007585	respiratory gaseous exchange by respiratory system	1/44 2.27%	74/18048 0.41%	0.16556	0.301971	ENSRNOG00000062986	Ccbe1	1	ENSRNOG00000062986	Ccbe1	1	--	--	0
Biological process	GO:0008347	glial cell migration	1/44 2.27%	74/18048 0.41%	0.16556	0.301971	ENSRNOG00000014288	Fn1	1	ENSRNOG00000014288	Fn1	1	--	--	0
Biological process	GO:0021545	cranial nerve development	1/44 2.27%	74/18048 0.41%	0.16556	0.301971	ENSRNOG00000007250	Six4	1	--	--	0	ENSRNOG00000007250	Six4	1
Biological process	GO:0055002	striated muscle cell development	1/44 2.27%	74/18048 0.41%	0.16556	0.301971	ENSRNOG00000007250	Six4	1	--	--	0	ENSRNOG00000007250	Six4	1
Biological process	GO:0060541	respiratory system development	2/44 4.55%	300/18048 1.66%	0.165854	0.301989	ENSRNOG00000062986;ENSRNOG00000007250	Ccbe1;Six4	2	ENSRNOG00000062986	Ccbe1	1	ENSRNOG00000007250	Six4	1
Molecular function	GO:0015297	antiporter activity	1/40 2.5%	76/16737 0.45%	0.166615	0.267462	ENSRNOG00000015567	Slc9a2	1	ENSRNOG00000015567	Slc9a2	1	--	--	0
Molecular function	GO:0098960	postsynaptic neurotransmitter receptor activity	1/40 2.5%	76/16737 0.45%	0.166615	0.267462	ENSRNOG00000013829	Chrna3	1	--	--	0	ENSRNOG00000013829	Chrna3	1
Biological process	GO:0043588	skin development	2/44 4.55%	302/18048 1.67%	0.167581	0.303106	ENSRNOG00000020557;ENSRNOG00000011823	Ryr1;Tfap2b	2	ENSRNOG00000020557;ENSRNOG00000011823	Ryr1;Tfap2b	2	--	--	0
Biological process	GO:0015807	L-amino acid transport	1/44 2.27%	75/18048 0.42%	0.167603	0.303106	ENSRNOG00000068642	Slc6a20a	1	ENSRNOG00000068642	Slc6a20a	1	--	--	0
Biological process	GO:0061035	regulation of cartilage development	1/44 2.27%	75/18048 0.42%	0.167603	0.303106	ENSRNOG00000068029	Six2	1	ENSRNOG00000068029	Six2	1	--	--	0
Biological process	GO:0070527	platelet aggregation	1/44 2.27%	75/18048 0.42%	0.167603	0.303106	ENSRNOG00000014288	Fn1	1	ENSRNOG00000014288	Fn1	1	--	--	0
Biological process	GO:0032835	glomerulus development	1/44 2.27%	76/18048 0.42%	0.169641	0.305755	ENSRNOG00000004210	Osr1	1	ENSRNOG00000004210	Osr1	1	--	--	0
Biological process	GO:1904036	negative regulation of epithelial cell apoptotic process	1/44 2.27%	76/18048 0.42%	0.169641	0.305755	ENSRNOG00000005108	Wfs1	1	ENSRNOG00000005108	Wfs1	1	--	--	0
Biological process	GO:0010822	positive regulation of mitochondrion organization	1/44 2.27%	77/18048 0.43%	0.171674	0.307342	ENSRNOG00000011923	Mgarp	1	--	--	0	ENSRNOG00000011923	Mgarp	1
Biological process	GO:0019731	antibacterial humoral response	1/44 2.27%	77/18048 0.43%	0.171674	0.307342	ENSRNOG00000009434	Inhca	1	ENSRNOG00000009434	Inhca	1	--	--	0
Biological process	GO:0035094	response to nicotine	1/44 2.27%	77/18048 0.43%	0.171674	0.307342	ENSRNOG00000013829	Chrna3	1	--	--	0	ENSRNOG00000013829	Chrna3	1
Biological process	GO:1902475	L-alpha-amino acid transmembrane transport	1/44 2.27%	77/18048 0.43%	0.171674	0.307342	ENSRNOG00000068642	Slc6a20a	1	ENSRNOG00000068642	Slc6a20a	1	--	--	0
Biological process	GO:0002931	response to ischemia	1/44 2.27%	78/18048 0.43%	0.173702	0.309415	ENSRNOG00000014288	Fn1	1	ENSRNOG00000014288	Fn1	1	--	--	0
Biological process	GO:1903317	regulation of protein maturation	1/44 2.27%	78/18048 0.43%	0.173702	0.309415	ENSRNOG00000062986	Ccbe1	1	ENSRNOG00000062986	Ccbe1	1	--	--	0
Biological process	GO:1905818	regulation of chromosome separation	1/44 2.27%	78/18048 0.43%	0.173702	0.309415	ENSRNOG00000012051	Ncaph	1	--	--	0	ENSRNOG00000012051	Ncaph	1
Biological process	GO:0070192	chromosome organization involved in meiotic cell cycle	1/44 2.27%	79/18048 0.44%	0.175725	0.312498	ENSRNOG00000012051	Ncaph	1	--	--	0	ENSRNOG00000012051	Ncaph	1
Molecular function	GO:0030971	receptor tyrosine kinase binding	1/40 2.5%	82/16737 0.49%	0.17855	0.281678	ENSRNOG00000003407	Ptpn14	1	ENSRNOG00000003407	Ptpn14	1	--	--	0
Molecular function	GO:0140104	molecular carrier activity	1/40 2.5%	82/16737 0.49%	0.17855	0.281678	ENSRNOG00000011719	Ngb	1	--	--	0	ENSRNOG00000011719	Ngb	1
Biological process	GO:0030198	extracellular matrix organization	2/44 4.55%	315/18048 1.75%	0.178884	0.314947	ENSRNOG00000053753;ENSRNOG00000014288	Thsd4;Fn1	2	ENSRNOG00000053753;ENSRNOG00000014288	Thsd4;Fn1	2	--	--	0
Biological process	GO:0001707	mesoderm formation	1/44 2.27%	81/18048 0.45%	0.179757	0.314947	ENSRNOG00000068029	Six2	1	ENSRNOG00000068029	Six2	1	--	--	0
Biological process	GO:0048844	artery morphogenesis	1/44 2.27%	81/18048 0.45%	0.179757	0.314947	ENSRNOG00000011823	Tfap2b	1	ENSRNOG00000011823	Tfap2b	1	--	--	0
Biological process	GO:0071300	cellular response to retinoic acid	1/44 2.27%	81/18048 0.45%	0.179757	0.314947	ENSRNOG00000004210	Osr1	1	ENSRNOG00000004210	Osr1	1	--	--	0
Biological process	GO:0099024	plasma membrane invagination	1/44 2.27%	81/18048 0.45%	0.179757	0.314947	ENSRNOG00000017510	Mfge8	1	ENSRNOG00000017510	Mfge8	1	--	--	0
Biological process	GO:0140115	export across plasma membrane	1/44 2.27%	81/18048 0.45%	0.179757	0.314947	ENSRNOG00000029811	Kcne2	1	--	--	0	ENSRNOG00000029811	Kcne2	1
Biological process	GO:1901016	regulation of potassium ion transmembrane transporter activity	1/44 2.27%	81/18048 0.45%	0.179757	0.314947	ENSRNOG00000029811	Kcne2	1	--	--	0	ENSRNOG00000029811	Kcne2	1
Biological process	GO:0043062	extracellular structure organization	2/44 4.55%	316/18048 1.75%	0.179759	0.314947	ENSRNOG00000053753;ENSRNOG00000014288	Thsd4;Fn1	2	ENSRNOG00000053753;ENSRNOG00000014288	Thsd4;Fn1	2	--	--	0
Biological process	GO:0045927	positive regulation of growth	2/44 4.55%	316/18048 1.75%	0.179759	0.314947	ENSRNOG00000005108;ENSRNOG00000014288	Wfs1;Fn1	2	ENSRNOG00000005108;ENSRNOG00000014288	Wfs1;Fn1	2	--	--	0
Biological process	GO:0045229	external encapsulating structure organization	2/44 4.55%	317/18048 1.76%	0.180634	0.31587	ENSRNOG00000053753;ENSRNOG00000014288	Thsd4;Fn1	2	ENSRNOG00000053753;ENSRNOG00000014288	Thsd4;Fn1	2	--	--	0
Biological process	GO:0014068	positive regulation of phosphatidylinositol 3-kinase signaling	1/44 2.27%	82/18048 0.45%	0.181766	0.31587	ENSRNOG00000014288	Fn1	1	ENSRNOG00000014288	Fn1	1	--	--	0
Biological process	GO:0030433	ubiquitin-dependent ERAD pathway	1/44 2.27%	82/18048 0.45%	0.181766	0.31587	ENSRNOG00000005108	Wfs1	1	ENSRNOG00000005108	Wfs1	1	--	--	0
Biological process	GO:0030641	regulation of cellular pH	1/44 2.27%	82/18048 0.45%	0.181766	0.31587	ENSRNOG00000015567	Slc9a2	1	ENSRNOG00000015567	Slc9a2	1	--	--	0
Biological process	GO:0051926	negative regulation of calcium ion transport	1/44 2.27%	82/18048 0.45%	0.181766	0.31587	ENSRNOG00000012609	Trdn	1	ENSRNOG00000012609	Trdn	1	--	--	0
Biological process	GO:0061448	connective tissue development	2/44 4.55%	319/18048 1.77%	0.182387	0.316435	ENSRNOG00000068029;ENSRNOG00000004210	Six2;Osr1	2	ENSRNOG00000068029;ENSRNOG00000004210	Six2;Osr1	2	--	--	0
Biological process	GO:0048146	positive regulation of fibroblast proliferation	1/44 2.27%	83/18048 0.46%	0.18377	0.316772	ENSRNOG00000014288	Fn1	1	ENSRNOG00000014288	Fn1	1	--	--	0
Biological process	GO:0060042	retina morphogenesis in camera-type eye	1/44 2.27%	83/18048 0.46%	0.18377	0.316772	ENSRNOG00000011823	Tfap2b	1	ENSRNOG00000011823	Tfap2b	1	--	--	0
Biological process	GO:0072384	organelle transport along microtubule	1/44 2.27%	83/18048 0.46%	0.18377	0.316772	ENSRNOG00000011923	Mgarp	1	--	--	0	ENSRNOG00000011923	Mgarp	1
Biological process	GO:1905897	regulation of response to endoplasmic reticulum stress	1/44 2.27%	83/18048 0.46%	0.18377	0.316772	ENSRNOG00000005108	Wfs1	1	ENSRNOG00000005108	Wfs1	1	--	--	0
Biological process	GO:0090287	regulation of cellular response to growth factor stimulus	2/44 4.55%	321/18048 1.78%	0.184143	0.316904	ENSRNOG00000062986;ENSRNOG00000011823	Ccbe1;Tfap2b	2	ENSRNOG00000062986;ENSRNOG00000011823	Ccbe1;Tfap2b	2	--	--	0
Molecular function	GO:0015171	amino acid transmembrane transporter activity	1/40 2.5%	85/16737 0.51%	0.184455	0.286061	ENSRNOG00000068642	Slc6a20a	1	ENSRNOG00000068642	Slc6a20a	1	--	--	0
Molecular function	GO:0038024	cargo receptor activity	1/40 2.5%	85/16737 0.51%	0.184455	0.286061	ENSRNOG00000010253	Cd163	1	ENSRNOG00000010253	Cd163	1	--	--	0
Biological process	GO:0003151	outflow tract morphogenesis	1/44 2.27%	84/18048 0.47%	0.185769	0.319187	ENSRNOG00000020557	Ryr1	1	ENSRNOG00000020557	Ryr1	1	--	--	0
Cellular component	GO:0000794	condensed nuclear chromosome	1/46 2.17%	82/18303 0.45%	0.186821	0.414204	ENSRNOG00000012051	Ncaph	1	--	--	0	ENSRNOG00000012051	Ncaph	1
Biological process	GO:0002067	glandular epithelial cell differentiation	1/44 2.27%	85/18048 0.47%	0.187763	0.320037	ENSRNOG00000010917	Bmp5	1	ENSRNOG00000010917	Bmp5	1	--	--	0
Biological process	GO:0035019	somatic stem cell population maintenance	1/44 2.27%	85/18048 0.47%	0.187763	0.320037	ENSRNOG00000068029	Six2	1	ENSRNOG00000068029	Six2	1	--	--	0
Biological process	GO:0035914	skeletal muscle cell differentiation	1/44 2.27%	85/18048 0.47%	0.187763	0.320037	ENSRNOG00000007250	Six4	1	--	--	0	ENSRNOG00000007250	Six4	1
Biological process	GO:0048332	mesoderm morphogenesis	1/44 2.27%	85/18048 0.47%	0.187763	0.320037	ENSRNOG00000068029	Six2	1	ENSRNOG00000068029	Six2	1	--	--	0
Biological process	GO:1900076	regulation of cellular response to insulin stimulus	1/44 2.27%	85/18048 0.47%	0.187763	0.320037	ENSRNOG00000013793	C1qtnf9	1	--	--	0	ENSRNOG00000013793	C1qtnf9	1
Molecular function	GO:0097110	scaffold protein binding	1/40 2.5%	87/16737 0.52%	0.188368	0.289676	ENSRNOG00000010253	Cd163	1	ENSRNOG00000010253	Cd163	1	--	--	0
Cellular component	GO:0032592	integral component of mitochondrial membrane	1/46 2.17%	83/18303 0.45%	0.188874	0.414204	ENSRNOG00000011923	Mgarp	1	--	--	0	ENSRNOG00000011923	Mgarp	1
Biological process	GO:0008088	axo-dendritic transport	1/44 2.27%	86/18048 0.48%	0.189753	0.322398	ENSRNOG00000011923	Mgarp	1	--	--	0	ENSRNOG00000011923	Mgarp	1
Biological process	GO:0050810	regulation of steroid biosynthetic process	1/44 2.27%	86/18048 0.48%	0.189753	0.322398	ENSRNOG00000010917	Bmp5	1	ENSRNOG00000010917	Bmp5	1	--	--	0
Cellular component	GO:0098573	intrinsic component of mitochondrial membrane	1/46 2.17%	84/18303 0.46%	0.190922	0.414204	ENSRNOG00000011923	Mgarp	1	--	--	0	ENSRNOG00000011923	Mgarp	1
Biological process	GO:0008406	gonad development	2/44 4.55%	329/18048 1.82%	0.191191	0.324222	ENSRNOG00000007250;ENSRNOG00000004210	Six4;Osr1	2	ENSRNOG00000004210	Osr1	1	ENSRNOG00000007250	Six4	1
Biological process	GO:0030500	regulation of bone mineralization	1/44 2.27%	87/18048 0.48%	0.191737	0.324222	ENSRNOG00000004210	Osr1	1	ENSRNOG00000004210	Osr1	1	--	--	0
Biological process	GO:0060411	cardiac septum morphogenesis	1/44 2.27%	87/18048 0.48%	0.191737	0.324222	ENSRNOG00000010917	Bmp5	1	ENSRNOG00000010917	Bmp5	1	--	--	0
Molecular function	GO:0004722	protein serine/threonine phosphatase activity	1/40 2.5%	89/16737 0.53%	0.192264	0.293202	ENSRNOG00000052061	Ppef2	1	--	--	0	ENSRNOG00000052061	Ppef2	1
Biological process	GO:0014032	neural crest cell development	1/44 2.27%	88/18048 0.49%	0.193717	0.327051	ENSRNOG00000014288	Fn1	1	ENSRNOG00000014288	Fn1	1	--	--	0
Molecular function	GO:0048306	calcium-dependent protein binding	1/40 2.5%	90/16737 0.54%	0.194204	0.293714	ENSRNOG00000005108	Wfs1	1	ENSRNOG00000005108	Wfs1	1	--	--	0
Biological process	GO:0010324	membrane invagination	1/44 2.27%	89/18048 0.49%	0.195693	0.329344	ENSRNOG00000017510	Mfge8	1	ENSRNOG00000017510	Mfge8	1	--	--	0
Biological process	GO:0051279	regulation of release of sequestered calcium ion into cytosol	1/44 2.27%	89/18048 0.49%	0.195693	0.329344	ENSRNOG00000012609	Trdn	1	ENSRNOG00000012609	Trdn	1	--	--	0
Molecular function	GO:0042562	hormone binding	1/40 2.5%	91/16737 0.54%	0.196141	0.294211	ENSRNOG00000061215	Crym	1	ENSRNOG00000061215	Crym	1	--	--	0
Biological process	GO:0045137	development of primary sexual characteristics	2/44 4.55%	335/18048 1.86%	0.196502	0.329542	ENSRNOG00000007250;ENSRNOG00000004210	Six4;Osr1	2	ENSRNOG00000004210	Osr1	1	ENSRNOG00000007250	Six4	1
Biological process	GO:0006913	nucleocytoplasmic transport	2/44 4.55%	336/18048 1.86%	0.197389	0.329542	ENSRNOG00000003407;ENSRNOG00000068029	Ptpn14;Six2	2	ENSRNOG00000003407;ENSRNOG00000068029	Ptpn14;Six2	2	--	--	0
Biological process	GO:0016042	lipid catabolic process	2/44 4.55%	336/18048 1.86%	0.197389	0.329542	ENSRNOG00000026855;ENSRNOG00000026661	Abhd12b;Hcar1	2	ENSRNOG00000026661	Hcar1	1	ENSRNOG00000026855	Abhd12b	1
Biological process	GO:0071241	cellular response to inorganic substance	2/44 4.55%	336/18048 1.86%	0.197389	0.329542	ENSRNOG00000014288;ENSRNOG00000020557	Fn1;Ryr1	2	ENSRNOG00000014288;ENSRNOG00000020557	Fn1;Ryr1	2	--	--	0
Biological process	GO:0007492	endoderm development	1/44 2.27%	90/18048 0.5%	0.197663	0.329542	ENSRNOG00000014288	Fn1	1	ENSRNOG00000014288	Fn1	1	--	--	0
Biological process	GO:1903201	regulation of oxidative stress-induced cell death	1/44 2.27%	90/18048 0.5%	0.197663	0.329542	ENSRNOG00000011719	Ngb	1	--	--	0	ENSRNOG00000011719	Ngb	1
Molecular function	GO:0004725	protein tyrosine phosphatase activity	1/40 2.5%	92/16737 0.55%	0.198072	0.294693	ENSRNOG00000003407	Ptpn14	1	ENSRNOG00000003407	Ptpn14	1	--	--	0
Biological process	GO:0051169	nuclear transport	2/44 4.55%	337/18048 1.87%	0.198276	0.330048	ENSRNOG00000003407;ENSRNOG00000068029	Ptpn14;Six2	2	ENSRNOG00000003407;ENSRNOG00000068029	Ptpn14;Six2	2	--	--	0
Biological process	GO:0045995	regulation of embryonic development	1/44 2.27%	91/18048 0.5%	0.199629	0.331266	ENSRNOG00000004210	Osr1	1	ENSRNOG00000004210	Osr1	1	--	--	0
Biological process	GO:0050766	positive regulation of phagocytosis	1/44 2.27%	91/18048 0.5%	0.199629	0.331266	ENSRNOG00000017510	Mfge8	1	ENSRNOG00000017510	Mfge8	1	--	--	0
Molecular function	GO:0004620	phospholipase activity	1/40 2.5%	93/16737 0.56%	0.199999	0.29516	ENSRNOG00000026855	Abhd12b	1	--	--	0	ENSRNOG00000026855	Abhd12b	1
Biological process	GO:0007029	endoplasmic reticulum organization	1/44 2.27%	92/18048 0.51%	0.20159	0.334001	ENSRNOG00000012609	Trdn	1	ENSRNOG00000012609	Trdn	1	--	--	0
Biological process	GO:0034504	protein localization to nucleus	2/44 4.55%	342/18048 1.89%	0.202722	0.334645	ENSRNOG00000007250;ENSRNOG00000068029	Six4;Six2	2	ENSRNOG00000068029	Six2	1	ENSRNOG00000007250	Six4	1
Biological process	GO:0034620	cellular response to unfolded protein	1/44 2.27%	93/18048 0.52%	0.203547	0.334645	ENSRNOG00000005108	Wfs1	1	ENSRNOG00000005108	Wfs1	1	--	--	0
Biological process	GO:0043525	positive regulation of neuron apoptotic process	1/44 2.27%	93/18048 0.52%	0.203547	0.334645	ENSRNOG00000011823	Tfap2b	1	ENSRNOG00000011823	Tfap2b	1	--	--	0
Biological process	GO:0051262	protein tetramerization	1/44 2.27%	93/18048 0.52%	0.203547	0.334645	ENSRNOG00000020557	Ryr1	1	ENSRNOG00000020557	Ryr1	1	--	--	0
Biological process	GO:0071277	cellular response to calcium ion	1/44 2.27%	93/18048 0.52%	0.203547	0.334645	ENSRNOG00000020557	Ryr1	1	ENSRNOG00000020557	Ryr1	1	--	--	0
Molecular function	GO:0008238	exopeptidase activity	1/40 2.5%	95/16737 0.57%	0.20384	0.298422	ENSRNOG00000008947	Cpz	1	ENSRNOG00000008947	Cpz	1	--	--	0
Biological process	GO:2000300	regulation of synaptic vesicle exocytosis	1/44 2.27%	94/18048 0.52%	0.205499	0.337334	ENSRNOG00000013829	Chrna3	1	--	--	0	ENSRNOG00000013829	Chrna3	1
Molecular function	GO:0050660	flavin adenine dinucleotide binding	1/40 2.5%	96/16737 0.57%	0.205754	0.298487	ENSRNOG00000003620	Fmo3	1	ENSRNOG00000003620	Fmo3	1	--	--	0
Molecular function	GO:0042578	phosphoric ester hydrolase activity	2/40 5%	354/16737 2.12%	0.207146	0.298487	ENSRNOG00000052061;ENSRNOG00000003407	Ppef2;Ptpn14	2	ENSRNOG00000003407	Ptpn14	1	ENSRNOG00000052061	Ppef2	1
Biological process	GO:0006885	regulation of pH	1/44 2.27%	95/18048 0.53%	0.207446	0.340007	ENSRNOG00000015567	Slc9a2	1	ENSRNOG00000015567	Slc9a2	1	--	--	0
Biological process	GO:0061053	somite development	1/44 2.27%	96/18048 0.53%	0.209388	0.342664	ENSRNOG00000007250	Six4	1	--	--	0	ENSRNOG00000007250	Six4	1
Biological process	GO:0051235	maintenance of location	2/44 4.55%	351/18048 1.94%	0.210756	0.343727	ENSRNOG00000012609;ENSRNOG00000020557	Trdn;Ryr1	2	ENSRNOG00000012609;ENSRNOG00000020557	Trdn;Ryr1	2	--	--	0
Biological process	GO:0048814	regulation of dendrite morphogenesis	1/44 2.27%	97/18048 0.54%	0.211326	0.343727	ENSRNOG00000013829	Chrna3	1	--	--	0	ENSRNOG00000013829	Chrna3	1
Biological process	GO:0048864	stem cell development	1/44 2.27%	97/18048 0.54%	0.211326	0.343727	ENSRNOG00000014288	Fn1	1	ENSRNOG00000014288	Fn1	1	--	--	0
Biological process	GO:0051899	membrane depolarization	1/44 2.27%	97/18048 0.54%	0.211326	0.343727	ENSRNOG00000013829	Chrna3	1	--	--	0	ENSRNOG00000013829	Chrna3	1
Molecular function	GO:0015294	solute:cation symporter activity	1/40 2.5%	99/16737 0.59%	0.211468	0.302333	ENSRNOG00000068642	Slc6a20a	1	ENSRNOG00000068642	Slc6a20a	1	--	--	0
Biological process	GO:0043648	dicarboxylic acid metabolic process	1/44 2.27%	98/18048 0.54%	0.213259	0.345292	ENSRNOG00000001261	Ftcd	1	--	--	0	ENSRNOG00000001261	Ftcd	1
Biological process	GO:0051983	regulation of chromosome segregation	1/44 2.27%	98/18048 0.54%	0.213259	0.345292	ENSRNOG00000012051	Ncaph	1	--	--	0	ENSRNOG00000012051	Ncaph	1
Biological process	GO:0070252	actin-mediated cell contraction	1/44 2.27%	98/18048 0.54%	0.213259	0.345292	ENSRNOG00000029811	Kcne2	1	--	--	0	ENSRNOG00000029811	Kcne2	1
Molecular function	GO:0051117	ATPase binding	1/40 2.5%	100/16737 0.6%	0.213363	0.302678	ENSRNOG00000005108	Wfs1	1	ENSRNOG00000005108	Wfs1	1	--	--	0
Cellular component	GO:0042470	melanosome	1/46 2.17%	96/18303 0.52%	0.215105	0.451368	ENSRNOG00000014465	Oca2	1	--	--	0	ENSRNOG00000014465	Oca2	1
Cellular component	GO:0048770	pigment granule	1/46 2.17%	96/18303 0.52%	0.215105	0.451368	ENSRNOG00000014465	Oca2	1	--	--	0	ENSRNOG00000014465	Oca2	1
Biological process	GO:0007044	cell-substrate junction assembly	1/44 2.27%	99/18048 0.55%	0.215187	0.34736	ENSRNOG00000014288	Fn1	1	ENSRNOG00000014288	Fn1	1	--	--	0
Biological process	GO:0060395	SMAD protein signal transduction	1/44 2.27%	99/18048 0.55%	0.215187	0.34736	ENSRNOG00000010917	Bmp5	1	ENSRNOG00000010917	Bmp5	1	--	--	0
Biological process	GO:0001708	cell fate specification	1/44 2.27%	100/18048 0.55%	0.217111	0.348882	ENSRNOG00000068029	Six2	1	ENSRNOG00000068029	Six2	1	--	--	0
Biological process	GO:0003407	neural retina development	1/44 2.27%	100/18048 0.55%	0.217111	0.348882	ENSRNOG00000011823	Tfap2b	1	ENSRNOG00000011823	Tfap2b	1	--	--	0
Biological process	GO:0051304	chromosome separation	1/44 2.27%	100/18048 0.55%	0.217111	0.348882	ENSRNOG00000012051	Ncaph	1	--	--	0	ENSRNOG00000012051	Ncaph	1
Biological process	GO:0014033	neural crest cell differentiation	1/44 2.27%	101/18048 0.56%	0.219031	0.350909	ENSRNOG00000014288	Fn1	1	ENSRNOG00000014288	Fn1	1	--	--	0
Biological process	GO:0042246	tissue regeneration	1/44 2.27%	101/18048 0.56%	0.219031	0.350909	ENSRNOG00000016437	Tm4sf4	1	--	--	0	ENSRNOG00000016437	Tm4sf4	1
Cellular component	GO:0030667	secretory granule membrane	1/46 2.17%	98/18303 0.54%	0.219066	0.452266	ENSRNOG00000017510	Mfge8	1	ENSRNOG00000017510	Mfge8	1	--	--	0
Biological process	GO:0009798	axis specification	1/44 2.27%	102/18048 0.57%	0.220945	0.351864	ENSRNOG00000068029	Six2	1	ENSRNOG00000068029	Six2	1	--	--	0
Biological process	GO:0043473	pigmentation	1/44 2.27%	102/18048 0.57%	0.220945	0.351864	ENSRNOG00000014465	Oca2	1	--	--	0	ENSRNOG00000014465	Oca2	1
Biological process	GO:0045132	meiotic chromosome segregation	1/44 2.27%	102/18048 0.57%	0.220945	0.351864	ENSRNOG00000012051	Ncaph	1	--	--	0	ENSRNOG00000012051	Ncaph	1
Biological process	GO:0060021	roof of mouth development	1/44 2.27%	102/18048 0.57%	0.220945	0.351864	ENSRNOG00000004210	Osr1	1	ENSRNOG00000004210	Osr1	1	--	--	0
Biological process	GO:0007517	muscle organ development	2/44 4.55%	364/18048 2.02%	0.222419	0.353683	ENSRNOG00000007250;ENSRNOG00000020557	Six4;Ryr1	2	ENSRNOG00000020557	Ryr1	1	ENSRNOG00000007250	Six4	1
Biological process	GO:0006626	protein targeting to mitochondrion	1/44 2.27%	103/18048 0.57%	0.222855	0.353849	ENSRNOG00000011923	Mgarp	1	--	--	0	ENSRNOG00000011923	Mgarp	1
Biological process	GO:0002028	regulation of sodium ion transport	1/44 2.27%	104/18048 0.58%	0.224761	0.355659	ENSRNOG00000004210	Osr1	1	ENSRNOG00000004210	Osr1	1	--	--	0
Biological process	GO:0034109	homotypic cell-cell adhesion	1/44 2.27%	104/18048 0.58%	0.224761	0.355659	ENSRNOG00000014288	Fn1	1	ENSRNOG00000014288	Fn1	1	--	--	0
Biological process	GO:0009063	cellular amino acid catabolic process	1/44 2.27%	105/18048 0.58%	0.226662	0.355659	ENSRNOG00000001261	Ftcd	1	--	--	0	ENSRNOG00000001261	Ftcd	1
Biological process	GO:0034308	primary alcohol metabolic process	1/44 2.27%	105/18048 0.58%	0.226662	0.355659	ENSRNOG00000010917	Bmp5	1	ENSRNOG00000010917	Bmp5	1	--	--	0
Biological process	GO:0036503	ERAD pathway	1/44 2.27%	105/18048 0.58%	0.226662	0.355659	ENSRNOG00000005108	Wfs1	1	ENSRNOG00000005108	Wfs1	1	--	--	0
Biological process	GO:0050772	positive regulation of axonogenesis	1/44 2.27%	105/18048 0.58%	0.226662	0.355659	ENSRNOG00000014288	Fn1	1	ENSRNOG00000014288	Fn1	1	--	--	0
Biological process	GO:0150115	cell-substrate junction organization	1/44 2.27%	105/18048 0.58%	0.226662	0.355659	ENSRNOG00000014288	Fn1	1	ENSRNOG00000014288	Fn1	1	--	--	0
Biological process	GO:1900407	regulation of cellular response to oxidative stress	1/44 2.27%	105/18048 0.58%	0.226662	0.355659	ENSRNOG00000011719	Ngb	1	--	--	0	ENSRNOG00000011719	Ngb	1
Biological process	GO:0070167	regulation of biomineral tissue development	1/44 2.27%	106/18048 0.59%	0.228558	0.358108	ENSRNOG00000004210	Osr1	1	ENSRNOG00000004210	Osr1	1	--	--	0
Molecular function	GO:0051087	chaperone binding	1/40 2.5%	109/16737 0.65%	0.230226	0.322605	ENSRNOG00000014288	Fn1	1	ENSRNOG00000014288	Fn1	1	--	--	0
Biological process	GO:2001252	positive regulation of chromosome organization	1/44 2.27%	107/18048 0.59%	0.23045	0.360543	ENSRNOG00000012051	Ncaph	1	--	--	0	ENSRNOG00000012051	Ncaph	1
Molecular function	GO:0022804	active transmembrane transporter activity	2/40 5%	381/16737 2.28%	0.230936	0.322605	ENSRNOG00000068642;ENSRNOG00000015567	Slc6a20a;Slc9a2	2	ENSRNOG00000068642;ENSRNOG00000015567	Slc6a20a;Slc9a2	2	--	--	0
Biological process	GO:0030510	regulation of BMP signaling pathway	1/44 2.27%	108/18048 0.6%	0.232337	0.362433	ENSRNOG00000011823	Tfap2b	1	ENSRNOG00000011823	Tfap2b	1	--	--	0
Biological process	GO:0110149	regulation of biomineralization	1/44 2.27%	108/18048 0.6%	0.232337	0.362433	ENSRNOG00000004210	Osr1	1	ENSRNOG00000004210	Osr1	1	--	--	0
Cellular component	GO:0031234	extrinsic component of cytoplasmic side of plasma membrane	1/46 2.17%	105/18303 0.57%	0.232777	0.472944	ENSRNOG00000020557	Ryr1	1	ENSRNOG00000020557	Ryr1	1	--	--	0
Molecular function	GO:0030594	neurotransmitter receptor activity	1/40 2.5%	111/16737 0.66%	0.233925	0.324306	ENSRNOG00000013829	Chrna3	1	--	--	0	ENSRNOG00000013829	Chrna3	1
Biological process	GO:0003333	amino acid transmembrane transport	1/44 2.27%	109/18048 0.6%	0.23422	0.364304	ENSRNOG00000068642	Slc6a20a	1	ENSRNOG00000068642	Slc6a20a	1	--	--	0
Biological process	GO:2001243	negative regulation of intrinsic apoptotic signaling pathway	1/44 2.27%	109/18048 0.6%	0.23422	0.364304	ENSRNOG00000005108	Wfs1	1	ENSRNOG00000005108	Wfs1	1	--	--	0
Molecular function	GO:0016298	lipase activity	1/40 2.5%	112/16737 0.67%	0.235768	0.324403	ENSRNOG00000026855	Abhd12b	1	--	--	0	ENSRNOG00000026855	Abhd12b	1
Biological process	GO:0051702	biological process involved in interaction with symbiont	1/44 2.27%	110/18048 0.61%	0.236098	0.366158	ENSRNOG00000014288	Fn1	1	ENSRNOG00000014288	Fn1	1	--	--	0
Biological process	GO:1901379	regulation of potassium ion transmembrane transport	1/44 2.27%	110/18048 0.61%	0.236098	0.366158	ENSRNOG00000029811	Kcne2	1	--	--	0	ENSRNOG00000029811	Kcne2	1
Cellular component	GO:0099060	integral component of postsynaptic specialization membrane	1/46 2.17%	107/18303 0.58%	0.236651	0.473302	ENSRNOG00000013829	Chrna3	1	--	--	0	ENSRNOG00000013829	Chrna3	1
Biological process	GO:0021675	nerve development	1/44 2.27%	111/18048 0.62%	0.237972	0.367995	ENSRNOG00000007250	Six4	1	--	--	0	ENSRNOG00000007250	Six4	1
Biological process	GO:0034446	substrate adhesion-dependent cell spreading	1/44 2.27%	111/18048 0.62%	0.237972	0.367995	ENSRNOG00000014288	Fn1	1	ENSRNOG00000014288	Fn1	1	--	--	0
Biological process	GO:0014066	regulation of phosphatidylinositol 3-kinase signaling	1/44 2.27%	112/18048 0.62%	0.239841	0.369813	ENSRNOG00000014288	Fn1	1	ENSRNOG00000014288	Fn1	1	--	--	0
Biological process	GO:0035282	segmentation	1/44 2.27%	112/18048 0.62%	0.239841	0.369813	ENSRNOG00000004210	Osr1	1	ENSRNOG00000004210	Osr1	1	--	--	0
Cellular component	GO:0120111	neuron projection cytoplasm	1/46 2.17%	109/18303 0.6%	0.240506	0.473611	ENSRNOG00000011923	Mgarp	1	--	--	0	ENSRNOG00000011923	Mgarp	1
Biological process	GO:0035967	cellular response to topologically incorrect protein	1/44 2.27%	113/18048 0.63%	0.241706	0.371615	ENSRNOG00000005108	Wfs1	1	ENSRNOG00000005108	Wfs1	1	--	--	0
Biological process	GO:0036473	cell death in response to oxidative stress	1/44 2.27%	113/18048 0.63%	0.241706	0.371615	ENSRNOG00000011719	Ngb	1	--	--	0	ENSRNOG00000011719	Ngb	1
Molecular function	GO:0005262	calcium channel activity	1/40 2.5%	116/16737 0.69%	0.243098	0.331992	ENSRNOG00000020557	Ryr1	1	ENSRNOG00000020557	Ryr1	1	--	--	0
Biological process	GO:0001892	embryonic placenta development	1/44 2.27%	114/18048 0.63%	0.243567	0.372863	ENSRNOG00000010917	Bmp5	1	ENSRNOG00000010917	Bmp5	1	--	--	0
Biological process	GO:0018107	peptidyl-threonine phosphorylation	1/44 2.27%	114/18048 0.63%	0.243567	0.372863	ENSRNOG00000052061	Ppef2	1	--	--	0	ENSRNOG00000052061	Ppef2	1
Biological process	GO:0019882	antigen processing and presentation	1/44 2.27%	114/18048 0.63%	0.243567	0.372863	ENSRNOG00000065254	RT1-CE16	1	--	--	0	ENSRNOG00000065254	RT1-CE16	1
Molecular function	GO:0015078	proton transmembrane transporter activity	1/40 2.5%	117/16737 0.7%	0.244919	0.332002	ENSRNOG00000015567	Slc9a2	1	ENSRNOG00000015567	Slc9a2	1	--	--	0
Biological process	GO:0003002	regionalization	2/44 4.55%	389/18048 2.16%	0.244996	0.374094	ENSRNOG00000068029;ENSRNOG00000004210	Six2;Osr1	2	ENSRNOG00000068029;ENSRNOG00000004210	Six2;Osr1	2	--	--	0
Biological process	GO:0006986	response to unfolded protein	1/44 2.27%	115/18048 0.64%	0.245422	0.374094	ENSRNOG00000005108	Wfs1	1	ENSRNOG00000005108	Wfs1	1	--	--	0
Biological process	GO:1902882	regulation of response to oxidative stress	1/44 2.27%	115/18048 0.64%	0.245422	0.374094	ENSRNOG00000011719	Ngb	1	--	--	0	ENSRNOG00000011719	Ngb	1
Biological process	GO:0002027	regulation of heart rate	1/44 2.27%	116/18048 0.64%	0.247274	0.375308	ENSRNOG00000029811	Kcne2	1	--	--	0	ENSRNOG00000029811	Kcne2	1
Biological process	GO:0006805	xenobiotic metabolic process	1/44 2.27%	116/18048 0.64%	0.247274	0.375308	ENSRNOG00000003620	Fmo3	1	ENSRNOG00000003620	Fmo3	1	--	--	0
Biological process	GO:0030168	platelet activation	1/44 2.27%	116/18048 0.64%	0.247274	0.375308	ENSRNOG00000014288	Fn1	1	ENSRNOG00000014288	Fn1	1	--	--	0
Cellular component	GO:0098948	intrinsic component of postsynaptic specialization membrane	1/46 2.17%	113/18303 0.62%	0.248158	0.481276	ENSRNOG00000013829	Chrna3	1	--	--	0	ENSRNOG00000013829	Chrna3	1
Biological process	GO:0062014	negative regulation of small molecule metabolic process	1/44 2.27%	117/18048 0.65%	0.249121	0.377038	ENSRNOG00000010917	Bmp5	1	ENSRNOG00000010917	Bmp5	1	--	--	0
Biological process	GO:1901800	positive regulation of proteasomal protein catabolic process	1/44 2.27%	117/18048 0.65%	0.249121	0.377038	ENSRNOG00000029811	Kcne2	1	--	--	0	ENSRNOG00000029811	Kcne2	1
Biological process	GO:0019216	regulation of lipid metabolic process	2/44 4.55%	394/18048 2.18%	0.249528	0.377119	ENSRNOG00000026661;ENSRNOG00000010917	Hcar1;Bmp5	2	ENSRNOG00000026661;ENSRNOG00000010917	Hcar1;Bmp5	2	--	--	0
Biological process	GO:0014020	primary neural tube formation	1/44 2.27%	118/18048 0.65%	0.250963	0.377152	ENSRNOG00000010917	Bmp5	1	ENSRNOG00000010917	Bmp5	1	--	--	0
Biological process	GO:0019395	fatty acid oxidation	1/44 2.27%	118/18048 0.65%	0.250963	0.377152	ENSRNOG00000013793	C1qtnf9	1	--	--	0	ENSRNOG00000013793	C1qtnf9	1
Biological process	GO:0060079	excitatory postsynaptic potential	1/44 2.27%	118/18048 0.65%	0.250963	0.377152	ENSRNOG00000013829	Chrna3	1	--	--	0	ENSRNOG00000013829	Chrna3	1
Biological process	GO:0060840	artery development	1/44 2.27%	118/18048 0.65%	0.250963	0.377152	ENSRNOG00000011823	Tfap2b	1	ENSRNOG00000011823	Tfap2b	1	--	--	0
Biological process	GO:0033555	multicellular organismal response to stress	1/44 2.27%	119/18048 0.66%	0.252801	0.379378	ENSRNOG00000029811	Kcne2	1	--	--	0	ENSRNOG00000029811	Kcne2	1
Biological process	GO:0007178	transmembrane receptor protein serine/threonine kinase signaling pathway	2/44 4.55%	398/18048 2.21%	0.253155	0.379378	ENSRNOG00000011823;ENSRNOG00000010917	Tfap2b;Bmp5	2	ENSRNOG00000011823;ENSRNOG00000010917	Tfap2b;Bmp5	2	--	--	0
Biological process	GO:0000041	transition metal ion transport	1/44 2.27%	120/18048 0.66%	0.254635	0.380494	ENSRNOG00000009434	Inhca	1	ENSRNOG00000009434	Inhca	1	--	--	0
Biological process	GO:0030516	regulation of axon extension	1/44 2.27%	120/18048 0.66%	0.254635	0.380494	ENSRNOG00000014288	Fn1	1	ENSRNOG00000014288	Fn1	1	--	--	0
Biological process	GO:0002764	immune response-regulating signaling pathway	2/44 4.55%	400/18048 2.22%	0.25497	0.380494	ENSRNOG00000022975;ENSRNOG00000023881	Nfam1;Skap1	2	ENSRNOG00000022975;ENSRNOG00000023881	Nfam1;Skap1	2	--	--	0
Cellular component	GO:0005604	basement membrane	1/46 2.17%	117/18303 0.64%	0.255735	0.488569	ENSRNOG00000014288	Fn1	1	ENSRNOG00000014288	Fn1	1	--	--	0
Biological process	GO:0019218	regulation of steroid metabolic process	1/44 2.27%	121/18048 0.67%	0.256465	0.381125	ENSRNOG00000010917	Bmp5	1	ENSRNOG00000010917	Bmp5	1	--	--	0
Biological process	GO:0031398	positive regulation of protein ubiquitination	1/44 2.27%	121/18048 0.67%	0.256465	0.381125	ENSRNOG00000005108	Wfs1	1	ENSRNOG00000005108	Wfs1	1	--	--	0
Biological process	GO:0042472	inner ear morphogenesis	1/44 2.27%	121/18048 0.67%	0.256465	0.381125	ENSRNOG00000007250	Six4	1	--	--	0	ENSRNOG00000007250	Six4	1
Biological process	GO:0032963	collagen metabolic process	1/44 2.27%	122/18048 0.68%	0.258289	0.383303	ENSRNOG00000014288	Fn1	1	ENSRNOG00000014288	Fn1	1	--	--	0
Biological process	GO:0018210	peptidyl-threonine modification	1/44 2.27%	123/18048 0.68%	0.26011	0.384934	ENSRNOG00000052061	Ppef2	1	--	--	0	ENSRNOG00000052061	Ppef2	1
Biological process	GO:0051952	regulation of amine transport	1/44 2.27%	123/18048 0.68%	0.26011	0.384934	ENSRNOG00000013829	Chrna3	1	--	--	0	ENSRNOG00000013829	Chrna3	1
Biological process	GO:0009914	hormone transport	2/44 4.55%	408/18048 2.26%	0.262233	0.387082	ENSRNOG00000061215;ENSRNOG00000011823	Crym;Tfap2b	2	ENSRNOG00000061215;ENSRNOG00000011823	Crym;Tfap2b	2	--	--	0
Molecular function	GO:1990782	protein tyrosine kinase binding	1/40 2.5%	127/16737 0.76%	0.262901	0.353757	ENSRNOG00000003407	Ptpn14	1	ENSRNOG00000003407	Ptpn14	1	--	--	0
Biological process	GO:0006939	smooth muscle contraction	1/44 2.27%	125/18048 0.69%	0.263738	0.387082	ENSRNOG00000013829	Chrna3	1	--	--	0	ENSRNOG00000013829	Chrna3	1
Biological process	GO:0030048	actin filament-based movement	1/44 2.27%	125/18048 0.69%	0.263738	0.387082	ENSRNOG00000029811	Kcne2	1	--	--	0	ENSRNOG00000029811	Kcne2	1
Biological process	GO:0034440	lipid oxidation	1/44 2.27%	125/18048 0.69%	0.263738	0.387082	ENSRNOG00000013793	C1qtnf9	1	--	--	0	ENSRNOG00000013793	C1qtnf9	1
Biological process	GO:0051963	regulation of synapse assembly	1/44 2.27%	125/18048 0.69%	0.263738	0.387082	ENSRNOG00000007250	Six4	1	--	--	0	ENSRNOG00000007250	Six4	1
Biological process	GO:0072655	establishment of protein localization to mitochondrion	1/44 2.27%	125/18048 0.69%	0.263738	0.387082	ENSRNOG00000011923	Mgarp	1	--	--	0	ENSRNOG00000011923	Mgarp	1
Molecular function	GO:0005179	hormone activity	1/40 2.5%	129/16737 0.77%	0.266447	0.355911	ENSRNOG00000013793	C1qtnf9	1	--	--	0	ENSRNOG00000013793	C1qtnf9	1
Biological process	GO:0050764	regulation of phagocytosis	1/44 2.27%	127/18048 0.7%	0.267349	0.390722	ENSRNOG00000017510	Mfge8	1	ENSRNOG00000017510	Mfge8	1	--	--	0
Biological process	GO:0090100	positive regulation of transmembrane receptor protein serine/threonine kinase signaling pathway	1/44 2.27%	127/18048 0.7%	0.267349	0.390722	ENSRNOG00000010917	Bmp5	1	ENSRNOG00000010917	Bmp5	1	--	--	0
Biological process	GO:0099565	chemical synaptic transmission, postsynaptic	1/44 2.27%	127/18048 0.7%	0.267349	0.390722	ENSRNOG00000013829	Chrna3	1	--	--	0	ENSRNOG00000013829	Chrna3	1
Biological process	GO:0032535	regulation of cellular component size	2/44 4.55%	414/18048 2.29%	0.267683	0.390722	ENSRNOG00000013793;ENSRNOG00000014288	C1qtnf9;Fn1	2	ENSRNOG00000014288	Fn1	1	ENSRNOG00000013793	C1qtnf9	1
Biological process	GO:0007018	microtubule-based movement	2/44 4.55%	417/18048 2.31%	0.270408	0.393327	ENSRNOG00000011923;ENSRNOG00000002571	Mgarp;Tekt5	2	ENSRNOG00000002571	Tekt5	1	ENSRNOG00000011923	Mgarp	1
Biological process	GO:0048638	regulation of developmental growth	2/44 4.55%	417/18048 2.31%	0.270408	0.393327	ENSRNOG00000014288;ENSRNOG00000007250	Fn1;Six4	2	ENSRNOG00000014288	Fn1	1	ENSRNOG00000007250	Six4	1
Biological process	GO:0015837	amine transport	1/44 2.27%	129/18048 0.71%	0.270942	0.393327	ENSRNOG00000013829	Chrna3	1	--	--	0	ENSRNOG00000013829	Chrna3	1
Biological process	GO:0050852	T cell receptor signaling pathway	1/44 2.27%	129/18048 0.71%	0.270942	0.393327	ENSRNOG00000023881	Skap1	1	ENSRNOG00000023881	Skap1	1	--	--	0
Molecular function	GO:0015085	calcium ion transmembrane transporter activity	1/40 2.5%	132/16737 0.79%	0.271735	0.359777	ENSRNOG00000020557	Ryr1	1	ENSRNOG00000020557	Ryr1	1	--	--	0
Cellular component	GO:0140534	endoplasmic reticulum protein-containing complex	1/46 2.17%	126/18303 0.69%	0.272511	0.504737	ENSRNOG00000020557	Ryr1	1	ENSRNOG00000020557	Ryr1	1	--	--	0
Biological process	GO:0003279	cardiac septum development	1/44 2.27%	130/18048 0.72%	0.272732	0.395388	ENSRNOG00000010917	Bmp5	1	ENSRNOG00000010917	Bmp5	1	--	--	0
Molecular function	GO:0019842	vitamin binding	1/40 2.5%	133/16737 0.79%	0.273489	0.359777	ENSRNOG00000001261	Ftcd	1	--	--	0	ENSRNOG00000001261	Ftcd	1
Biological process	GO:0045860	positive regulation of protein kinase activity	2/44 4.55%	421/18048 2.33%	0.274042	0.396361	ENSRNOG00000013793;ENSRNOG00000013829	C1qtnf9;Chrna3	2	--	--	0	ENSRNOG00000013793;ENSRNOG00000013829	C1qtnf9;Chrna3	2
Biological process	GO:0048678	response to axon injury	1/44 2.27%	131/18048 0.73%	0.274518	0.396361	ENSRNOG00000014021	Matn4	1	--	--	0	ENSRNOG00000014021	Matn4	1
Biological process	GO:0070585	protein localization to mitochondrion	1/44 2.27%	131/18048 0.73%	0.274518	0.396361	ENSRNOG00000011923	Mgarp	1	--	--	0	ENSRNOG00000011923	Mgarp	1
Molecular function	GO:0015293	symporter activity	1/40 2.5%	134/16737 0.8%	0.27524	0.359777	ENSRNOG00000068642	Slc6a20a	1	ENSRNOG00000068642	Slc6a20a	1	--	--	0
Biological process	GO:0001841	neural tube formation	1/44 2.27%	133/18048 0.74%	0.278077	0.399338	ENSRNOG00000010917	Bmp5	1	ENSRNOG00000010917	Bmp5	1	--	--	0
Biological process	GO:0030282	bone mineralization	1/44 2.27%	133/18048 0.74%	0.278077	0.399338	ENSRNOG00000004210	Osr1	1	ENSRNOG00000004210	Osr1	1	--	--	0
Biological process	GO:0048145	regulation of fibroblast proliferation	1/44 2.27%	133/18048 0.74%	0.278077	0.399338	ENSRNOG00000014288	Fn1	1	ENSRNOG00000014288	Fn1	1	--	--	0
Biological process	GO:1903052	positive regulation of proteolysis involved in protein catabolic process	1/44 2.27%	133/18048 0.74%	0.278077	0.399338	ENSRNOG00000029811	Kcne2	1	--	--	0	ENSRNOG00000029811	Kcne2	1
Cellular component	GO:0044815	DNA packaging complex	1/46 2.17%	130/18303 0.71%	0.279848	0.504737	ENSRNOG00000012051	Ncaph	1	--	--	0	ENSRNOG00000012051	Ncaph	1
Biological process	GO:0010927	cellular component assembly involved in morphogenesis	1/44 2.27%	134/18048 0.74%	0.27985	0.400268	ENSRNOG00000007250	Six4	1	--	--	0	ENSRNOG00000007250	Six4	1
Biological process	GO:0043266	regulation of potassium ion transport	1/44 2.27%	134/18048 0.74%	0.27985	0.400268	ENSRNOG00000029811	Kcne2	1	--	--	0	ENSRNOG00000029811	Kcne2	1
Biological process	GO:1904035	regulation of epithelial cell apoptotic process	1/44 2.27%	134/18048 0.74%	0.27985	0.400268	ENSRNOG00000005108	Wfs1	1	ENSRNOG00000005108	Wfs1	1	--	--	0
Biological process	GO:0046822	regulation of nucleocytoplasmic transport	1/44 2.27%	135/18048 0.75%	0.281619	0.402259	ENSRNOG00000003407	Ptpn14	1	ENSRNOG00000003407	Ptpn14	1	--	--	0
Biological process	GO:0002526	acute inflammatory response	1/44 2.27%	136/18048 0.75%	0.283383	0.40316	ENSRNOG00000014288	Fn1	1	ENSRNOG00000014288	Fn1	1	--	--	0
Biological process	GO:0046928	regulation of neurotransmitter secretion	1/44 2.27%	136/18048 0.75%	0.283383	0.40316	ENSRNOG00000013829	Chrna3	1	--	--	0	ENSRNOG00000013829	Chrna3	1
Biological process	GO:0061387	regulation of extent of cell growth	1/44 2.27%	136/18048 0.75%	0.283383	0.40316	ENSRNOG00000014288	Fn1	1	ENSRNOG00000014288	Fn1	1	--	--	0
Biological process	GO:0035966	response to topologically incorrect protein	1/44 2.27%	137/18048 0.76%	0.285144	0.405124	ENSRNOG00000005108	Wfs1	1	ENSRNOG00000005108	Wfs1	1	--	--	0
Biological process	GO:0060048	cardiac muscle contraction	1/44 2.27%	138/18048 0.76%	0.2869	0.407077	ENSRNOG00000029811	Kcne2	1	--	--	0	ENSRNOG00000029811	Kcne2	1
Molecular function	GO:0099106	ion channel regulator activity	1/40 2.5%	141/16737 0.84%	0.287376	0.372978	ENSRNOG00000029811	Kcne2	1	--	--	0	ENSRNOG00000029811	Kcne2	1
Biological process	GO:1901654	response to ketone	2/44 4.55%	437/18048 2.42%	0.288574	0.407936	ENSRNOG00000014288;ENSRNOG00000046468	Fn1;Ptgfr	2	ENSRNOG00000014288;ENSRNOG00000046468	Fn1;Ptgfr	2	--	--	0
Cellular component	GO:0030141	secretory granule	2/46 4.35%	424/18303 2.32%	0.288652	0.504737	ENSRNOG00000005108;ENSRNOG00000017510	Wfs1;Mfge8	2	ENSRNOG00000005108;ENSRNOG00000017510	Wfs1;Mfge8	2	--	--	0
Biological process	GO:0001952	regulation of cell-matrix adhesion	1/44 2.27%	139/18048 0.77%	0.288652	0.407936	ENSRNOG00000023881	Skap1	1	ENSRNOG00000023881	Skap1	1	--	--	0
Biological process	GO:0010595	positive regulation of endothelial cell migration	1/44 2.27%	139/18048 0.77%	0.288652	0.407936	ENSRNOG00000062986	Ccbe1	1	ENSRNOG00000062986	Ccbe1	1	--	--	0
Cellular component	GO:0070062	extracellular exosome	1/46 2.17%	135/18303 0.74%	0.288918	0.504737	ENSRNOG00000014288	Fn1	1	ENSRNOG00000014288	Fn1	1	--	--	0
Biological process	GO:0071347	cellular response to interleukin-1	1/44 2.27%	140/18048 0.78%	0.2904	0.409863	ENSRNOG00000014288	Fn1	1	ENSRNOG00000014288	Fn1	1	--	--	0
Cellular component	GO:0030018	Z disc	1/46 2.17%	136/18303 0.74%	0.290718	0.504737	ENSRNOG00000020557	Ryr1	1	ENSRNOG00000020557	Ryr1	1	--	--	0
Biological process	GO:1901216	positive regulation of neuron death	1/44 2.27%	141/18048 0.78%	0.292143	0.411779	ENSRNOG00000011823	Tfap2b	1	ENSRNOG00000011823	Tfap2b	1	--	--	0
Biological process	GO:0043627	response to estrogen	1/44 2.27%	142/18048 0.79%	0.293882	0.413684	ENSRNOG00000017510	Mfge8	1	ENSRNOG00000017510	Mfge8	1	--	--	0
Biological process	GO:0002821	positive regulation of adaptive immune response	1/44 2.27%	143/18048 0.79%	0.295617	0.415578	ENSRNOG00000023881	Skap1	1	ENSRNOG00000023881	Skap1	1	--	--	0
Molecular function	GO:0008083	growth factor activity	1/40 2.5%	146/16737 0.87%	0.295924	0.377962	ENSRNOG00000010917	Bmp5	1	ENSRNOG00000010917	Bmp5	1	--	--	0
Biological process	GO:0006639	acylglycerol metabolic process	1/44 2.27%	144/18048 0.8%	0.297348	0.416046	ENSRNOG00000026855	Abhd12b	1	--	--	0	ENSRNOG00000026855	Abhd12b	1
Biological process	GO:1902600	proton transmembrane transport	1/44 2.27%	144/18048 0.8%	0.297348	0.416046	ENSRNOG00000015567	Slc9a2	1	ENSRNOG00000015567	Slc9a2	1	--	--	0
Biological process	GO:1903322	positive regulation of protein modification by small protein conjugation or removal	1/44 2.27%	144/18048 0.8%	0.297348	0.416046	ENSRNOG00000005108	Wfs1	1	ENSRNOG00000005108	Wfs1	1	--	--	0
Molecular function	GO:0016247	channel regulator activity	1/40 2.5%	147/16737 0.88%	0.297622	0.377962	ENSRNOG00000029811	Kcne2	1	--	--	0	ENSRNOG00000029811	Kcne2	1
Biological process	GO:0002065	columnar/cuboidal epithelial cell differentiation	1/44 2.27%	145/18048 0.8%	0.299075	0.416046	ENSRNOG00000010917	Bmp5	1	ENSRNOG00000010917	Bmp5	1	--	--	0
Biological process	GO:0030326	embryonic limb morphogenesis	1/44 2.27%	145/18048 0.8%	0.299075	0.416046	ENSRNOG00000004210	Osr1	1	ENSRNOG00000004210	Osr1	1	--	--	0
Biological process	GO:0035113	embryonic appendage morphogenesis	1/44 2.27%	145/18048 0.8%	0.299075	0.416046	ENSRNOG00000004210	Osr1	1	ENSRNOG00000004210	Osr1	1	--	--	0
Biological process	GO:0046165	alcohol biosynthetic process	1/44 2.27%	145/18048 0.8%	0.299075	0.416046	ENSRNOG00000010917	Bmp5	1	ENSRNOG00000010917	Bmp5	1	--	--	0
Biological process	GO:0070301	cellular response to hydrogen peroxide	1/44 2.27%	145/18048 0.8%	0.299075	0.416046	ENSRNOG00000011719	Ngb	1	--	--	0	ENSRNOG00000011719	Ngb	1
Molecular function	GO:0031072	heat shock protein binding	1/40 2.5%	148/16737 0.88%	0.299315	0.377962	ENSRNOG00000052061	Ppef2	1	--	--	0	ENSRNOG00000052061	Ppef2	1
Biological process	GO:0072594	establishment of protein localization to organelle	2/44 4.55%	449/18048 2.49%	0.29946	0.416046	ENSRNOG00000068029;ENSRNOG00000011923	Six2;Mgarp	2	ENSRNOG00000068029	Six2	1	ENSRNOG00000011923	Mgarp	1
Molecular function	GO:0003712	transcription coregulator activity	2/40 5%	458/16737 2.74%	0.299478	0.377962	ENSRNOG00000061215;ENSRNOG00000003407	Crym;Ptpn14	2	ENSRNOG00000061215;ENSRNOG00000003407	Crym;Ptpn14	2	--	--	0
Biological process	GO:0006638	neutral lipid metabolic process	1/44 2.27%	146/18048 0.81%	0.300798	0.41682	ENSRNOG00000026855	Abhd12b	1	--	--	0	ENSRNOG00000026855	Abhd12b	1
Biological process	GO:0098732	macromolecule deacylation	1/44 2.27%	146/18048 0.81%	0.300798	0.41682	ENSRNOG00000026855	Abhd12b	1	--	--	0	ENSRNOG00000026855	Abhd12b	1
Cellular component	GO:0030672	synaptic vesicle membrane	1/46 2.17%	142/18303 0.78%	0.301427	0.504737	ENSRNOG00000005108	Wfs1	1	ENSRNOG00000005108	Wfs1	1	--	--	0
Cellular component	GO:0099501	exocytic vesicle membrane	1/46 2.17%	142/18303 0.78%	0.301427	0.504737	ENSRNOG00000005108	Wfs1	1	ENSRNOG00000005108	Wfs1	1	--	--	0
Molecular function	GO:0004497	monooxygenase activity	1/40 2.5%	150/16737 0.9%	0.30269	0.378356	ENSRNOG00000003620	Fmo3	1	ENSRNOG00000003620	Fmo3	1	--	--	0
Molecular function	GO:0048018	receptor ligand activity	2/40 5%	463/16737 2.77%	0.303925	0.378356	ENSRNOG00000013793;ENSRNOG00000010917	C1qtnf9;Bmp5	2	ENSRNOG00000010917	Bmp5	1	ENSRNOG00000013793	C1qtnf9	1
Biological process	GO:0003206	cardiac chamber morphogenesis	1/44 2.27%	148/18048 0.82%	0.304231	0.419941	ENSRNOG00000010917	Bmp5	1	ENSRNOG00000010917	Bmp5	1	--	--	0
Biological process	GO:0010821	regulation of mitochondrion organization	1/44 2.27%	148/18048 0.82%	0.304231	0.419941	ENSRNOG00000011923	Mgarp	1	--	--	0	ENSRNOG00000011923	Mgarp	1
Biological process	GO:0014065	phosphatidylinositol 3-kinase signaling	1/44 2.27%	148/18048 0.82%	0.304231	0.419941	ENSRNOG00000014288	Fn1	1	ENSRNOG00000014288	Fn1	1	--	--	0
Biological process	GO:0050864	regulation of B cell activation	1/44 2.27%	149/18048 0.83%	0.305941	0.421111	ENSRNOG00000022975	Nfam1	1	ENSRNOG00000022975	Nfam1	1	--	--	0
Biological process	GO:0016079	synaptic vesicle exocytosis	1/44 2.27%	150/18048 0.83%	0.307647	0.421111	ENSRNOG00000013829	Chrna3	1	--	--	0	ENSRNOG00000013829	Chrna3	1
Biological process	GO:0046434	organophosphate catabolic process	1/44 2.27%	150/18048 0.83%	0.307647	0.421111	ENSRNOG00000026855	Abhd12b	1	--	--	0	ENSRNOG00000026855	Abhd12b	1
Biological process	GO:0031346	positive regulation of cell projection organization	2/44 4.55%	459/18048 2.54%	0.308515	0.421111	ENSRNOG00000014288;ENSRNOG00000010917	Fn1;Bmp5	2	ENSRNOG00000014288;ENSRNOG00000010917	Fn1;Bmp5	2	--	--	0
Biological process	GO:0008360	regulation of cell shape	1/44 2.27%	151/18048 0.84%	0.309349	0.421111	ENSRNOG00000014288	Fn1	1	ENSRNOG00000014288	Fn1	1	--	--	0
Biological process	GO:0014823	response to activity	1/44 2.27%	151/18048 0.84%	0.309349	0.421111	ENSRNOG00000014288	Fn1	1	ENSRNOG00000014288	Fn1	1	--	--	0
Biological process	GO:0019730	antimicrobial humoral response	1/44 2.27%	151/18048 0.84%	0.309349	0.421111	ENSRNOG00000009434	Inhca	1	ENSRNOG00000009434	Inhca	1	--	--	0
Biological process	GO:0032147	activation of protein kinase activity	1/44 2.27%	151/18048 0.84%	0.309349	0.421111	ENSRNOG00000013829	Chrna3	1	--	--	0	ENSRNOG00000013829	Chrna3	1
Biological process	GO:0034754	cellular hormone metabolic process	1/44 2.27%	151/18048 0.84%	0.309349	0.421111	ENSRNOG00000010917	Bmp5	1	ENSRNOG00000010917	Bmp5	1	--	--	0
Biological process	GO:0048675	axon extension	1/44 2.27%	151/18048 0.84%	0.309349	0.421111	ENSRNOG00000014288	Fn1	1	ENSRNOG00000014288	Fn1	1	--	--	0
Biological process	GO:0034329	cell junction assembly	2/44 4.55%	460/18048 2.55%	0.30942	0.421111	ENSRNOG00000014288;ENSRNOG00000007250	Fn1;Six4	2	ENSRNOG00000014288	Fn1	1	ENSRNOG00000007250	Six4	1
Biological process	GO:0051090	regulation of DNA-binding transcription factor activity	2/44 4.55%	461/18048 2.55%	0.310324	0.421804	ENSRNOG00000005108;ENSRNOG00000022975	Wfs1;Nfam1	2	ENSRNOG00000005108;ENSRNOG00000022975	Wfs1;Nfam1	2	--	--	0
Cellular component	GO:0005814	centriole	1/46 2.17%	148/18303 0.81%	0.311978	0.504737	ENSRNOG00000001261	Ftcd	1	--	--	0	ENSRNOG00000001261	Ftcd	1
Cellular component	GO:0031674	I band	1/46 2.17%	148/18303 0.81%	0.311978	0.504737	ENSRNOG00000020557	Ryr1	1	ENSRNOG00000020557	Ryr1	1	--	--	0
Cellular component	GO:1903561	extracellular vesicle	1/46 2.17%	148/18303 0.81%	0.311978	0.504737	ENSRNOG00000014288	Fn1	1	ENSRNOG00000014288	Fn1	1	--	--	0
Biological process	GO:0048593	camera-type eye morphogenesis	1/44 2.27%	153/18048 0.85%	0.312741	0.423608	ENSRNOG00000011823	Tfap2b	1	ENSRNOG00000011823	Tfap2b	1	--	--	0
Biological process	GO:0051588	regulation of neurotransmitter transport	1/44 2.27%	153/18048 0.85%	0.312741	0.423608	ENSRNOG00000013829	Chrna3	1	--	--	0	ENSRNOG00000013829	Chrna3	1
Biological process	GO:0007338	single fertilization	1/44 2.27%	154/18048 0.85%	0.314431	0.423608	ENSRNOG00000017510	Mfge8	1	ENSRNOG00000017510	Mfge8	1	--	--	0
Biological process	GO:0014812	muscle cell migration	1/44 2.27%	154/18048 0.85%	0.314431	0.423608	ENSRNOG00000007250	Six4	1	--	--	0	ENSRNOG00000007250	Six4	1
Biological process	GO:0030183	B cell differentiation	1/44 2.27%	154/18048 0.85%	0.314431	0.423608	ENSRNOG00000022975	Nfam1	1	ENSRNOG00000022975	Nfam1	1	--	--	0
Biological process	GO:0048144	fibroblast proliferation	1/44 2.27%	154/18048 0.85%	0.314431	0.423608	ENSRNOG00000014288	Fn1	1	ENSRNOG00000014288	Fn1	1	--	--	0
Biological process	GO:0072089	stem cell proliferation	1/44 2.27%	154/18048 0.85%	0.314431	0.423608	ENSRNOG00000068029	Six2	1	ENSRNOG00000068029	Six2	1	--	--	0
Cellular component	GO:0043230	extracellular organelle	1/46 2.17%	150/18303 0.82%	0.31546	0.504737	ENSRNOG00000014288	Fn1	1	ENSRNOG00000014288	Fn1	1	--	--	0
Cellular component	GO:0065010	extracellular membrane-bounded organelle	1/46 2.17%	150/18303 0.82%	0.31546	0.504737	ENSRNOG00000014288	Fn1	1	ENSRNOG00000014288	Fn1	1	--	--	0
Cellular component	GO:0099634	postsynaptic specialization membrane	1/46 2.17%	150/18303 0.82%	0.31546	0.504737	ENSRNOG00000013829	Chrna3	1	--	--	0	ENSRNOG00000013829	Chrna3	1
Molecular function	GO:0052689	carboxylic ester hydrolase activity	1/40 2.5%	159/16737 0.95%	0.317683	0.390374	ENSRNOG00000026855	Abhd12b	1	--	--	0	ENSRNOG00000026855	Abhd12b	1
Biological process	GO:0051168	nuclear export	1/44 2.27%	157/18048 0.87%	0.319476	0.429863	ENSRNOG00000003407	Ptpn14	1	ENSRNOG00000003407	Ptpn14	1	--	--	0
Molecular function	GO:0008201	heparin binding	1/40 2.5%	161/16737 0.96%	0.320972	0.390374	ENSRNOG00000014288	Fn1	1	ENSRNOG00000014288	Fn1	1	--	--	0
Biological process	GO:0010565	regulation of cellular ketone metabolic process	1/44 2.27%	158/18048 0.88%	0.32115	0.43157	ENSRNOG00000010917	Bmp5	1	ENSRNOG00000010917	Bmp5	1	--	--	0
Molecular function	GO:0008047	enzyme activator activity	2/40 5%	484/16737 2.89%	0.322553	0.390374	ENSRNOG00000014288;ENSRNOG00000030568	Fn1;Rgs12	2	ENSRNOG00000014288;ENSRNOG00000030568	Fn1;Rgs12	2	--	--	0
Molecular function	GO:0046943	carboxylic acid transmembrane transporter activity	1/40 2.5%	162/16737 0.97%	0.32261	0.390374	ENSRNOG00000068642	Slc6a20a	1	ENSRNOG00000068642	Slc6a20a	1	--	--	0
Cellular component	GO:0001669	acrosomal vesicle	1/46 2.17%	155/18303 0.85%	0.324091	0.512143	ENSRNOG00000017510	Mfge8	1	ENSRNOG00000017510	Mfge8	1	--	--	0
Molecular function	GO:0005342	organic acid transmembrane transporter activity	1/40 2.5%	163/16737 0.97%	0.324245	0.390374	ENSRNOG00000068642	Slc6a20a	1	ENSRNOG00000068642	Slc6a20a	1	--	--	0
Biological process	GO:0007189	adenylate cyclase-activating G protein-coupled receptor signaling pathway	1/44 2.27%	160/18048 0.89%	0.324485	0.434957	ENSRNOG00000046468	Ptgfr	1	ENSRNOG00000046468	Ptgfr	1	--	--	0
Biological process	GO:0032526	response to retinoic acid	1/44 2.27%	160/18048 0.89%	0.324485	0.434957	ENSRNOG00000004210	Osr1	1	ENSRNOG00000004210	Osr1	1	--	--	0
Biological process	GO:0001508	action potential	1/44 2.27%	161/18048 0.89%	0.326147	0.435542	ENSRNOG00000029811	Kcne2	1	--	--	0	ENSRNOG00000029811	Kcne2	1
Biological process	GO:0050921	positive regulation of chemotaxis	1/44 2.27%	161/18048 0.89%	0.326147	0.435542	ENSRNOG00000014288	Fn1	1	ENSRNOG00000014288	Fn1	1	--	--	0
Biological process	GO:1905039	carboxylic acid transmembrane transport	1/44 2.27%	161/18048 0.89%	0.326147	0.435542	ENSRNOG00000068642	Slc6a20a	1	ENSRNOG00000068642	Slc6a20a	1	--	--	0
Biological process	GO:0042476	odontogenesis	1/44 2.27%	162/18048 0.9%	0.327804	0.436118	ENSRNOG00000004210	Osr1	1	ENSRNOG00000004210	Osr1	1	--	--	0
Biological process	GO:0060078	regulation of postsynaptic membrane potential	1/44 2.27%	162/18048 0.9%	0.327804	0.436118	ENSRNOG00000013829	Chrna3	1	--	--	0	ENSRNOG00000013829	Chrna3	1
Biological process	GO:1903825	organic acid transmembrane transport	1/44 2.27%	162/18048 0.9%	0.327804	0.436118	ENSRNOG00000068642	Slc6a20a	1	ENSRNOG00000068642	Slc6a20a	1	--	--	0
Biological process	GO:0008037	cell recognition	1/44 2.27%	163/18048 0.9%	0.329458	0.437773	ENSRNOG00000017510	Mfge8	1	ENSRNOG00000017510	Mfge8	1	--	--	0
Cellular component	GO:0031225	anchored component of membrane	1/46 2.17%	159/18303 0.87%	0.330918	0.516555	ENSRNOG00000019445	Msln	1	ENSRNOG00000019445	Msln	1	--	--	0
Biological process	GO:0010970	transport along microtubule	1/44 2.27%	165/18048 0.91%	0.332753	0.440506	ENSRNOG00000011923	Mgarp	1	--	--	0	ENSRNOG00000011923	Mgarp	1
Biological process	GO:0048565	digestive tract development	1/44 2.27%	165/18048 0.91%	0.332753	0.440506	ENSRNOG00000068029	Six2	1	ENSRNOG00000068029	Six2	1	--	--	0
Biological process	GO:0060294	cilium movement involved in cell motility	1/44 2.27%	165/18048 0.91%	0.332753	0.440506	ENSRNOG00000002571	Tekt5	1	ENSRNOG00000002571	Tekt5	1	--	--	0
Biological process	GO:0000070	mitotic sister chromatid segregation	1/44 2.27%	166/18048 0.92%	0.334395	0.441379	ENSRNOG00000012051	Ncaph	1	--	--	0	ENSRNOG00000012051	Ncaph	1
Biological process	GO:0021987	cerebral cortex development	1/44 2.27%	166/18048 0.92%	0.334395	0.441379	ENSRNOG00000011923	Mgarp	1	--	--	0	ENSRNOG00000011923	Mgarp	1
Biological process	GO:0097305	response to alcohol	2/44 4.55%	488/18048 2.7%	0.334654	0.441379	ENSRNOG00000014288;ENSRNOG00000046468	Fn1;Ptgfr	2	ENSRNOG00000014288;ENSRNOG00000046468	Fn1;Ptgfr	2	--	--	0
Molecular function	GO:0003714	transcription corepressor activity	1/40 2.5%	170/16737 1.02%	0.335581	0.400681	ENSRNOG00000061215	Crym	1	ENSRNOG00000061215	Crym	1	--	--	0
Molecular function	GO:0020037	heme binding	1/40 2.5%	171/16737 1.02%	0.337185	0.400681	ENSRNOG00000011719	Ngb	1	--	--	0	ENSRNOG00000011719	Ngb	1
Biological process	GO:0006694	steroid biosynthetic process	1/44 2.27%	168/18048 0.93%	0.337666	0.443707	ENSRNOG00000010917	Bmp5	1	ENSRNOG00000010917	Bmp5	1	--	--	0
Biological process	GO:0006865	amino acid transport	1/44 2.27%	168/18048 0.93%	0.337666	0.443707	ENSRNOG00000068642	Slc6a20a	1	ENSRNOG00000068642	Slc6a20a	1	--	--	0
Biological process	GO:1904019	epithelial cell apoptotic process	1/44 2.27%	168/18048 0.93%	0.337666	0.443707	ENSRNOG00000005108	Wfs1	1	ENSRNOG00000005108	Wfs1	1	--	--	0
Biological process	GO:0045785	positive regulation of cell adhesion	2/44 4.55%	496/18048 2.75%	0.341823	0.44846	ENSRNOG00000014288;ENSRNOG00000023881	Fn1;Skap1	2	ENSRNOG00000014288;ENSRNOG00000023881	Fn1;Skap1	2	--	--	0
Molecular function	GO:0031406	carboxylic acid binding	1/40 2.5%	174/16737 1.04%	0.341975	0.403751	ENSRNOG00000001261	Ftcd	1	--	--	0	ENSRNOG00000001261	Ftcd	1
Biological process	GO:0010977	negative regulation of neuron projection development	1/44 2.27%	171/18048 0.95%	0.342544	0.44846	ENSRNOG00000011923	Mgarp	1	--	--	0	ENSRNOG00000011923	Mgarp	1
Biological process	GO:0019827	stem cell population maintenance	1/44 2.27%	171/18048 0.95%	0.342544	0.44846	ENSRNOG00000068029	Six2	1	ENSRNOG00000068029	Six2	1	--	--	0
Biological process	GO:0022412	cellular process involved in reproduction in multicellular organism	2/44 4.55%	499/18048 2.76%	0.344506	0.450475	ENSRNOG00000012051;ENSRNOG00000014465	Ncaph;Oca2	2	--	--	0	ENSRNOG00000012051;ENSRNOG00000014465	Ncaph;Oca2	2
Biological process	GO:0033674	positive regulation of kinase activity	2/44 4.55%	500/18048 2.77%	0.3454	0.450481	ENSRNOG00000013793;ENSRNOG00000013829	C1qtnf9;Chrna3	2	--	--	0	ENSRNOG00000013793;ENSRNOG00000013829	C1qtnf9;Chrna3	2
Biological process	GO:0001539	cilium or flagellum-dependent cell motility	1/44 2.27%	173/18048 0.96%	0.345777	0.450481	ENSRNOG00000002571	Tekt5	1	ENSRNOG00000002571	Tekt5	1	--	--	0
Biological process	GO:0060285	cilium-dependent cell motility	1/44 2.27%	173/18048 0.96%	0.345777	0.450481	ENSRNOG00000002571	Tekt5	1	ENSRNOG00000002571	Tekt5	1	--	--	0
Biological process	GO:0015698	inorganic anion transport	1/44 2.27%	174/18048 0.96%	0.347387	0.451476	ENSRNOG00000029811	Kcne2	1	--	--	0	ENSRNOG00000029811	Kcne2	1
Biological process	GO:0120254	olefinic compound metabolic process	1/44 2.27%	174/18048 0.96%	0.347387	0.451476	ENSRNOG00000010917	Bmp5	1	ENSRNOG00000010917	Bmp5	1	--	--	0
Biological process	GO:0006937	regulation of muscle contraction	1/44 2.27%	175/18048 0.97%	0.348994	0.452462	ENSRNOG00000013829	Chrna3	1	--	--	0	ENSRNOG00000013829	Chrna3	1
Biological process	GO:0070555	response to interleukin-1	1/44 2.27%	175/18048 0.97%	0.348994	0.452462	ENSRNOG00000014288	Fn1	1	ENSRNOG00000014288	Fn1	1	--	--	0
Biological process	GO:0035270	endocrine system development	1/44 2.27%	176/18048 0.98%	0.350596	0.453438	ENSRNOG00000010917	Bmp5	1	ENSRNOG00000010917	Bmp5	1	--	--	0
Biological process	GO:0098727	maintenance of cell number	1/44 2.27%	176/18048 0.98%	0.350596	0.453438	ENSRNOG00000068029	Six2	1	ENSRNOG00000068029	Six2	1	--	--	0
Cellular component	GO:0005741	mitochondrial outer membrane	1/46 2.17%	171/18303 0.93%	0.350998	0.524823	ENSRNOG00000011923	Mgarp	1	--	--	0	ENSRNOG00000011923	Mgarp	1
Molecular function	GO:0046906	tetrapyrrole binding	1/40 2.5%	180/16737 1.08%	0.351454	0.412282	ENSRNOG00000011719	Ngb	1	--	--	0	ENSRNOG00000011719	Ngb	1
Cellular component	GO:0099055	integral component of postsynaptic membrane	1/46 2.17%	173/18303 0.95%	0.354287	0.524823	ENSRNOG00000013829	Chrna3	1	--	--	0	ENSRNOG00000013829	Chrna3	1
Cellular component	GO:0005667	transcription regulator complex	2/46 4.35%	495/18303 2.7%	0.354523	0.524823	ENSRNOG00000007250;ENSRNOG00000068029	Six4;Six2	2	ENSRNOG00000068029	Six2	1	ENSRNOG00000007250	Six4	1
Biological process	GO:0031214	biomineral tissue development	1/44 2.27%	179/18048 0.99%	0.355381	0.45907	ENSRNOG00000004210	Osr1	1	ENSRNOG00000004210	Osr1	1	--	--	0
Cellular component	GO:0036126	sperm flagellum	1/46 2.17%	174/18303 0.95%	0.355926	0.524823	ENSRNOG00000002571	Tekt5	1	ENSRNOG00000002571	Tekt5	1	--	--	0
Biological process	GO:0055123	digestive system development	1/44 2.27%	180/18048 1%	0.356969	0.460563	ENSRNOG00000068029	Six2	1	ENSRNOG00000068029	Six2	1	--	--	0
Molecular function	GO:0008514	organic anion transmembrane transporter activity	1/40 2.5%	184/16737 1.1%	0.357699	0.416095	ENSRNOG00000068642	Slc6a20a	1	ENSRNOG00000068642	Slc6a20a	1	--	--	0
Biological process	GO:0006606	protein import into nucleus	1/44 2.27%	181/18048 1%	0.358552	0.462047	ENSRNOG00000068029	Six2	1	ENSRNOG00000068029	Six2	1	--	--	0
Molecular function	GO:0019903	protein phosphatase binding	1/40 2.5%	185/16737 1.11%	0.359251	0.416095	ENSRNOG00000023881	Skap1	1	ENSRNOG00000023881	Skap1	1	--	--	0
Cellular component	GO:0009898	cytoplasmic side of plasma membrane	1/46 2.17%	177/18303 0.97%	0.360816	0.524823	ENSRNOG00000020557	Ryr1	1	ENSRNOG00000020557	Ryr1	1	--	--	0
Cellular component	GO:0055037	recycling endosome	1/46 2.17%	177/18303 0.97%	0.360816	0.524823	ENSRNOG00000009434	Inhca	1	ENSRNOG00000009434	Inhca	1	--	--	0
Molecular function	GO:0008237	metallopeptidase activity	1/40 2.5%	187/16737 1.12%	0.362344	0.417038	ENSRNOG00000008947	Cpz	1	ENSRNOG00000008947	Cpz	1	--	--	0
Biological process	GO:0006941	striated muscle contraction	1/44 2.27%	184/18048 1.02%	0.36328	0.467011	ENSRNOG00000029811	Kcne2	1	--	--	0	ENSRNOG00000029811	Kcne2	1
Biological process	GO:0048015	phosphatidylinositol-mediated signaling	1/44 2.27%	184/18048 1.02%	0.36328	0.467011	ENSRNOG00000014288	Fn1	1	ENSRNOG00000014288	Fn1	1	--	--	0
Biological process	GO:0051592	response to calcium ion	1/44 2.27%	185/18048 1.03%	0.364848	0.468463	ENSRNOG00000020557	Ryr1	1	ENSRNOG00000020557	Ryr1	1	--	--	0
Biological process	GO:0051170	import into nucleus	1/44 2.27%	186/18048 1.03%	0.366412	0.469906	ENSRNOG00000068029	Six2	1	ENSRNOG00000068029	Six2	1	--	--	0
Biological process	GO:0048017	inositol lipid-mediated signaling	1/44 2.27%	187/18048 1.04%	0.367973	0.470776	ENSRNOG00000014288	Fn1	1	ENSRNOG00000014288	Fn1	1	--	--	0
Biological process	GO:0110148	biomineralization	1/44 2.27%	187/18048 1.04%	0.367973	0.470776	ENSRNOG00000004210	Osr1	1	ENSRNOG00000004210	Osr1	1	--	--	0
Biological process	GO:0007292	female gamete generation	1/44 2.27%	188/18048 1.04%	0.36953	0.471074	ENSRNOG00000012051	Ncaph	1	--	--	0	ENSRNOG00000012051	Ncaph	1
Biological process	GO:0033273	response to vitamin	1/44 2.27%	188/18048 1.04%	0.36953	0.471074	ENSRNOG00000061215	Crym	1	ENSRNOG00000061215	Crym	1	--	--	0
Biological process	GO:2001242	regulation of intrinsic apoptotic signaling pathway	1/44 2.27%	188/18048 1.04%	0.36953	0.471074	ENSRNOG00000005108	Wfs1	1	ENSRNOG00000005108	Wfs1	1	--	--	0
Cellular component	GO:0098936	intrinsic component of postsynaptic membrane	1/46 2.17%	183/18303 1%	0.370489	0.532838	ENSRNOG00000013829	Chrna3	1	--	--	0	ENSRNOG00000013829	Chrna3	1
Biological process	GO:0043279	response to alkaloid	1/44 2.27%	189/18048 1.05%	0.371083	0.471926	ENSRNOG00000020557	Ryr1	1	ENSRNOG00000020557	Ryr1	1	--	--	0
Biological process	GO:0048592	eye morphogenesis	1/44 2.27%	189/18048 1.05%	0.371083	0.471926	ENSRNOG00000011823	Tfap2b	1	ENSRNOG00000011823	Tfap2b	1	--	--	0
Molecular function	GO:0016829	lyase activity	1/40 2.5%	193/16737 1.15%	0.371537	0.424033	ENSRNOG00000001261	Ftcd	1	--	--	0	ENSRNOG00000001261	Ftcd	1
Biological process	GO:0050821	protein stabilization	1/44 2.27%	190/18048 1.05%	0.372633	0.473332	ENSRNOG00000005108	Wfs1	1	ENSRNOG00000005108	Wfs1	1	--	--	0
Molecular function	GO:0005125	cytokine activity	1/40 2.5%	194/16737 1.16%	0.373056	0.424033	ENSRNOG00000010917	Bmp5	1	ENSRNOG00000010917	Bmp5	1	--	--	0
Biological process	GO:0030534	adult behavior	1/44 2.27%	191/18048 1.06%	0.374179	0.474731	ENSRNOG00000013829	Chrna3	1	--	--	0	ENSRNOG00000013829	Chrna3	1
Biological process	GO:0010634	positive regulation of epithelial cell migration	1/44 2.27%	192/18048 1.06%	0.375721	0.475248	ENSRNOG00000062986	Ccbe1	1	ENSRNOG00000062986	Ccbe1	1	--	--	0
Biological process	GO:0030705	cytoskeleton-dependent intracellular transport	1/44 2.27%	192/18048 1.06%	0.375721	0.475248	ENSRNOG00000011923	Mgarp	1	--	--	0	ENSRNOG00000011923	Mgarp	1
Biological process	GO:0043433	negative regulation of DNA-binding transcription factor activity	1/44 2.27%	193/18048 1.07%	0.377259	0.475248	ENSRNOG00000005108	Wfs1	1	ENSRNOG00000005108	Wfs1	1	--	--	0
Biological process	GO:0048813	dendrite morphogenesis	1/44 2.27%	193/18048 1.07%	0.377259	0.475248	ENSRNOG00000013829	Chrna3	1	--	--	0	ENSRNOG00000013829	Chrna3	1
Biological process	GO:0050770	regulation of axonogenesis	1/44 2.27%	193/18048 1.07%	0.377259	0.475248	ENSRNOG00000014288	Fn1	1	ENSRNOG00000014288	Fn1	1	--	--	0
Biological process	GO:0061136	regulation of proteasomal protein catabolic process	1/44 2.27%	193/18048 1.07%	0.377259	0.475248	ENSRNOG00000029811	Kcne2	1	--	--	0	ENSRNOG00000029811	Kcne2	1
Cellular component	GO:0005925	focal adhesion	1/46 2.17%	188/18303 1.03%	0.37844	0.537637	ENSRNOG00000004516	Itgbl1	1	ENSRNOG00000004516	Itgbl1	1	--	--	0
Biological process	GO:0007596	blood coagulation	1/44 2.27%	194/18048 1.07%	0.378794	0.476619	ENSRNOG00000014288	Fn1	1	ENSRNOG00000014288	Fn1	1	--	--	0
Biological process	GO:0000819	sister chromatid segregation	1/44 2.27%	195/18048 1.08%	0.380324	0.477419	ENSRNOG00000012051	Ncaph	1	--	--	0	ENSRNOG00000012051	Ncaph	1
Biological process	GO:1903305	regulation of regulated secretory pathway	1/44 2.27%	195/18048 1.08%	0.380324	0.477419	ENSRNOG00000013829	Chrna3	1	--	--	0	ENSRNOG00000013829	Chrna3	1
Cellular component	GO:0097729	9+2 motile cilium	1/46 2.17%	191/18303 1.04%	0.383163	0.537637	ENSRNOG00000002571	Tekt5	1	ENSRNOG00000002571	Tekt5	1	--	--	0
Biological process	GO:0007599	hemostasis	1/44 2.27%	197/18048 1.09%	0.383375	0.479556	ENSRNOG00000014288	Fn1	1	ENSRNOG00000014288	Fn1	1	--	--	0
Biological process	GO:0010952	positive regulation of peptidase activity	1/44 2.27%	197/18048 1.09%	0.383375	0.479556	ENSRNOG00000014288	Fn1	1	ENSRNOG00000014288	Fn1	1	--	--	0
Biological process	GO:1901605	alpha-amino acid metabolic process	1/44 2.27%	197/18048 1.09%	0.383375	0.479556	ENSRNOG00000001261	Ftcd	1	--	--	0	ENSRNOG00000001261	Ftcd	1
Biological process	GO:0043409	negative regulation of MAPK cascade	1/44 2.27%	198/18048 1.1%	0.384895	0.480894	ENSRNOG00000052061	Ppef2	1	--	--	0	ENSRNOG00000052061	Ppef2	1
Biological process	GO:0001890	placenta development	1/44 2.27%	199/18048 1.1%	0.386411	0.481098	ENSRNOG00000010917	Bmp5	1	ENSRNOG00000010917	Bmp5	1	--	--	0
Biological process	GO:0046683	response to organophosphorus	1/44 2.27%	199/18048 1.1%	0.386411	0.481098	ENSRNOG00000020557	Ryr1	1	ENSRNOG00000020557	Ryr1	1	--	--	0
Biological process	GO:0140013	meiotic nuclear division	1/44 2.27%	199/18048 1.1%	0.386411	0.481098	ENSRNOG00000012051	Ncaph	1	--	--	0	ENSRNOG00000012051	Ncaph	1
Biological process	GO:0007416	synapse assembly	1/44 2.27%	200/18048 1.11%	0.387924	0.482418	ENSRNOG00000007250	Six4	1	--	--	0	ENSRNOG00000007250	Six4	1
Biological process	GO:0021915	neural tube development	1/44 2.27%	201/18048 1.11%	0.389433	0.483731	ENSRNOG00000010917	Bmp5	1	ENSRNOG00000010917	Bmp5	1	--	--	0
Biological process	GO:0003205	cardiac chamber development	1/44 2.27%	202/18048 1.12%	0.390938	0.483911	ENSRNOG00000010917	Bmp5	1	ENSRNOG00000010917	Bmp5	1	--	--	0
Biological process	GO:0030307	positive regulation of cell growth	1/44 2.27%	202/18048 1.12%	0.390938	0.483911	ENSRNOG00000014288	Fn1	1	ENSRNOG00000014288	Fn1	1	--	--	0
Biological process	GO:0050817	coagulation	1/44 2.27%	202/18048 1.12%	0.390938	0.483911	ENSRNOG00000014288	Fn1	1	ENSRNOG00000014288	Fn1	1	--	--	0
Cellular component	GO:0019867	outer membrane	1/46 2.17%	196/18303 1.07%	0.390957	0.537637	ENSRNOG00000011923	Mgarp	1	--	--	0	ENSRNOG00000011923	Mgarp	1
Cellular component	GO:0031968	organelle outer membrane	1/46 2.17%	196/18303 1.07%	0.390957	0.537637	ENSRNOG00000011923	Mgarp	1	--	--	0	ENSRNOG00000011923	Mgarp	1
Molecular function	GO:0005506	iron ion binding	1/40 2.5%	206/16737 1.23%	0.391013	0.4417	ENSRNOG00000052061	Ppef2	1	--	--	0	ENSRNOG00000052061	Ppef2	1
Biological process	GO:0009566	fertilization	1/44 2.27%	203/18048 1.12%	0.39244	0.484085	ENSRNOG00000017510	Mfge8	1	ENSRNOG00000017510	Mfge8	1	--	--	0
Biological process	GO:0034614	cellular response to reactive oxygen species	1/44 2.27%	203/18048 1.12%	0.39244	0.484085	ENSRNOG00000011719	Ngb	1	--	--	0	ENSRNOG00000011719	Ngb	1
Biological process	GO:0045619	regulation of lymphocyte differentiation	1/44 2.27%	203/18048 1.12%	0.39244	0.484085	ENSRNOG00000022975	Nfam1	1	ENSRNOG00000022975	Nfam1	1	--	--	0
Biological process	GO:0007269	neurotransmitter secretion	1/44 2.27%	204/18048 1.13%	0.393938	0.484253	ENSRNOG00000013829	Chrna3	1	--	--	0	ENSRNOG00000013829	Chrna3	1
Biological process	GO:0008584	male gonad development	1/44 2.27%	204/18048 1.13%	0.393938	0.484253	ENSRNOG00000007250	Six4	1	--	--	0	ENSRNOG00000007250	Six4	1
Biological process	GO:0099643	signal release from synapse	1/44 2.27%	204/18048 1.13%	0.393938	0.484253	ENSRNOG00000013829	Chrna3	1	--	--	0	ENSRNOG00000013829	Chrna3	1
Biological process	GO:0046546	development of primary male sexual characteristics	1/44 2.27%	205/18048 1.14%	0.395432	0.484973	ENSRNOG00000007250	Six4	1	--	--	0	ENSRNOG00000007250	Six4	1
Biological process	GO:0050796	regulation of insulin secretion	1/44 2.27%	205/18048 1.14%	0.395432	0.484973	ENSRNOG00000011823	Tfap2b	1	ENSRNOG00000011823	Tfap2b	1	--	--	0
Cellular component	GO:0030658	transport vesicle membrane	1/46 2.17%	199/18303 1.09%	0.395587	0.537637	ENSRNOG00000005108	Wfs1	1	ENSRNOG00000005108	Wfs1	1	--	--	0
Molecular function	GO:0016741	transferase activity, transferring one-carbon groups	1/40 2.5%	210/16737 1.25%	0.396887	0.445585	ENSRNOG00000001261	Ftcd	1	--	--	0	ENSRNOG00000001261	Ftcd	1
Biological process	GO:0046890	regulation of lipid biosynthetic process	1/44 2.27%	207/18048 1.15%	0.39841	0.487504	ENSRNOG00000010917	Bmp5	1	ENSRNOG00000010917	Bmp5	1	--	--	0
Biological process	GO:0099111	microtubule-based transport	1/44 2.27%	207/18048 1.15%	0.39841	0.487504	ENSRNOG00000011923	Mgarp	1	--	--	0	ENSRNOG00000011923	Mgarp	1
Cellular component	GO:0030055	cell-substrate junction	1/46 2.17%	202/18303 1.1%	0.400183	0.537637	ENSRNOG00000004516	Itgbl1	1	ENSRNOG00000004516	Itgbl1	1	--	--	0
Biological process	GO:0042542	response to hydrogen peroxide	1/44 2.27%	209/18048 1.16%	0.401374	0.488888	ENSRNOG00000011719	Ngb	1	--	--	0	ENSRNOG00000011719	Ngb	1
Biological process	GO:0045766	positive regulation of angiogenesis	1/44 2.27%	209/18048 1.16%	0.401374	0.488888	ENSRNOG00000062986	Ccbe1	1	ENSRNOG00000062986	Ccbe1	1	--	--	0
Biological process	GO:0071456	cellular response to hypoxia	1/44 2.27%	209/18048 1.16%	0.401374	0.488888	ENSRNOG00000011923	Mgarp	1	--	--	0	ENSRNOG00000011923	Mgarp	1
Biological process	GO:1904018	positive regulation of vasculature development	1/44 2.27%	209/18048 1.16%	0.401374	0.488888	ENSRNOG00000062986	Ccbe1	1	ENSRNOG00000062986	Ccbe1	1	--	--	0
Biological process	GO:0045732	positive regulation of protein catabolic process	1/44 2.27%	210/18048 1.16%	0.402851	0.490127	ENSRNOG00000029811	Kcne2	1	--	--	0	ENSRNOG00000029811	Kcne2	1
Cellular component	GO:0043204	perikaryon	1/46 2.17%	204/18303 1.11%	0.403228	0.537637	ENSRNOG00000011719	Ngb	1	--	--	0	ENSRNOG00000011719	Ngb	1
Biological process	GO:0006006	glucose metabolic process	1/44 2.27%	212/18048 1.17%	0.405793	0.493145	ENSRNOG00000011823	Tfap2b	1	ENSRNOG00000011823	Tfap2b	1	--	--	0
Molecular function	GO:0005539	glycosaminoglycan binding	1/40 2.5%	218/16737 1.3%	0.408468	0.455791	ENSRNOG00000014288	Fn1	1	ENSRNOG00000014288	Fn1	1	--	--	0
Biological process	GO:0003341	cilium movement	1/44 2.27%	214/18048 1.19%	0.408721	0.495574	ENSRNOG00000002571	Tekt5	1	ENSRNOG00000002571	Tekt5	1	--	--	0
Biological process	GO:0033044	regulation of chromosome organization	1/44 2.27%	214/18048 1.19%	0.408721	0.495574	ENSRNOG00000012051	Ncaph	1	--	--	0	ENSRNOG00000012051	Ncaph	1
Biological process	GO:0031334	positive regulation of protein-containing complex assembly	1/44 2.27%	215/18048 1.19%	0.41018	0.496215	ENSRNOG00000023881	Skap1	1	ENSRNOG00000023881	Skap1	1	--	--	0
Biological process	GO:1990138	neuron projection extension	1/44 2.27%	215/18048 1.19%	0.41018	0.496215	ENSRNOG00000014288	Fn1	1	ENSRNOG00000014288	Fn1	1	--	--	0
Biological process	GO:0031032	actomyosin structure organization	1/44 2.27%	216/18048 1.2%	0.411635	0.497412	ENSRNOG00000007250	Six4	1	--	--	0	ENSRNOG00000007250	Six4	1
Cellular component	GO:0030017	sarcomere	1/46 2.17%	210/18303 1.15%	0.412272	0.54265	ENSRNOG00000020557	Ryr1	1	ENSRNOG00000020557	Ryr1	1	--	--	0
Molecular function	GO:0005096	GTPase activator activity	1/40 2.5%	221/16737 1.32%	0.412755	0.457783	ENSRNOG00000030568	Rgs12	1	ENSRNOG00000030568	Rgs12	1	--	--	0
Biological process	GO:0019722	calcium-mediated signaling	1/44 2.27%	218/18048 1.21%	0.414535	0.499784	ENSRNOG00000046468	Ptgfr	1	ENSRNOG00000046468	Ptgfr	1	--	--	0
Biological process	GO:0060041	retina development in camera-type eye	1/44 2.27%	218/18048 1.21%	0.414535	0.499784	ENSRNOG00000011823	Tfap2b	1	ENSRNOG00000011823	Tfap2b	1	--	--	0
Molecular function	GO:0016705	oxidoreductase activity, acting on paired donors, with incorporation or reduction of molecular oxygen	1/40 2.5%	224/16737 1.34%	0.417012	0.459718	ENSRNOG00000003620	Fmo3	1	ENSRNOG00000003620	Fmo3	1	--	--	0
Biological process	GO:0007286	spermatid development	1/44 2.27%	220/18048 1.22%	0.417421	0.502696	ENSRNOG00000014465	Oca2	1	--	--	0	ENSRNOG00000014465	Oca2	1
Biological process	GO:0002819	regulation of adaptive immune response	1/44 2.27%	221/18048 1.22%	0.418859	0.503859	ENSRNOG00000023881	Skap1	1	ENSRNOG00000023881	Skap1	1	--	--	0
Cellular component	GO:0005765	lysosomal membrane	1/46 2.17%	215/18303 1.17%	0.419706	0.54265	ENSRNOG00000014465	Oca2	1	--	--	0	ENSRNOG00000014465	Oca2	1
Cellular component	GO:0098852	lytic vacuole membrane	1/46 2.17%	215/18303 1.17%	0.419706	0.54265	ENSRNOG00000014465	Oca2	1	--	--	0	ENSRNOG00000014465	Oca2	1
Biological process	GO:0071333	cellular response to glucose stimulus	1/44 2.27%	222/18048 1.23%	0.420294	0.505015	ENSRNOG00000014288	Fn1	1	ENSRNOG00000014288	Fn1	1	--	--	0
Biological process	GO:0030902	hindbrain development	1/44 2.27%	224/18048 1.24%	0.423152	0.506737	ENSRNOG00000010917	Bmp5	1	ENSRNOG00000010917	Bmp5	1	--	--	0
Biological process	GO:0048639	positive regulation of developmental growth	1/44 2.27%	224/18048 1.24%	0.423152	0.506737	ENSRNOG00000014288	Fn1	1	ENSRNOG00000014288	Fn1	1	--	--	0
Biological process	GO:0071331	cellular response to hexose stimulus	1/44 2.27%	224/18048 1.24%	0.423152	0.506737	ENSRNOG00000014288	Fn1	1	ENSRNOG00000014288	Fn1	1	--	--	0
Biological process	GO:0071326	cellular response to monosaccharide stimulus	1/44 2.27%	227/18048 1.26%	0.427414	0.510071	ENSRNOG00000014288	Fn1	1	ENSRNOG00000014288	Fn1	1	--	--	0
Biological process	GO:1903046	meiotic cell cycle process	1/44 2.27%	227/18048 1.26%	0.427414	0.510071	ENSRNOG00000012051	Ncaph	1	--	--	0	ENSRNOG00000012051	Ncaph	1
Biological process	GO:1903050	regulation of proteolysis involved in protein catabolic process	1/44 2.27%	227/18048 1.26%	0.427414	0.510071	ENSRNOG00000029811	Kcne2	1	--	--	0	ENSRNOG00000029811	Kcne2	1
Cellular component	GO:0000228	nuclear chromosome	1/46 2.17%	221/18303 1.21%	0.428506	0.544899	ENSRNOG00000012051	Ncaph	1	--	--	0	ENSRNOG00000012051	Ncaph	1
Biological process	GO:0071902	positive regulation of protein serine/threonine kinase activity	1/44 2.27%	228/18048 1.26%	0.428827	0.510071	ENSRNOG00000013793	C1qtnf9	1	--	--	0	ENSRNOG00000013793	C1qtnf9	1
Molecular function	GO:0019902	phosphatase binding	1/40 2.5%	233/16737 1.39%	0.429602	0.468181	ENSRNOG00000023881	Skap1	1	ENSRNOG00000023881	Skap1	1	--	--	0
Cellular component	GO:0098562	cytoplasmic side of membrane	1/46 2.17%	222/18303 1.21%	0.42996	0.544899	ENSRNOG00000020557	Ryr1	1	ENSRNOG00000020557	Ryr1	1	--	--	0
Biological process	GO:0030258	lipid modification	1/44 2.27%	229/18048 1.27%	0.430238	0.510071	ENSRNOG00000013793	C1qtnf9	1	--	--	0	ENSRNOG00000013793	C1qtnf9	1
Biological process	GO:0031345	negative regulation of cell projection organization	1/44 2.27%	229/18048 1.27%	0.430238	0.510071	ENSRNOG00000011923	Mgarp	1	--	--	0	ENSRNOG00000011923	Mgarp	1
Biological process	GO:0031396	regulation of protein ubiquitination	1/44 2.27%	229/18048 1.27%	0.430238	0.510071	ENSRNOG00000005108	Wfs1	1	ENSRNOG00000005108	Wfs1	1	--	--	0
Biological process	GO:0044242	cellular lipid catabolic process	1/44 2.27%	229/18048 1.27%	0.430238	0.510071	ENSRNOG00000026855	Abhd12b	1	--	--	0	ENSRNOG00000026855	Abhd12b	1
Biological process	GO:0048515	spermatid differentiation	1/44 2.27%	229/18048 1.27%	0.430238	0.510071	ENSRNOG00000014465	Oca2	1	--	--	0	ENSRNOG00000014465	Oca2	1
Molecular function	GO:0008022	protein C-terminus binding	1/40 2.5%	235/16737 1.4%	0.432364	0.468181	ENSRNOG00000014288	Fn1	1	ENSRNOG00000014288	Fn1	1	--	--	0
Molecular function	GO:0061134	peptidase regulator activity	1/40 2.5%	235/16737 1.4%	0.432364	0.468181	ENSRNOG00000014288	Fn1	1	ENSRNOG00000014288	Fn1	1	--	--	0
Biological process	GO:0010976	positive regulation of neuron projection development	1/44 2.27%	231/18048 1.28%	0.433048	0.512833	ENSRNOG00000010917	Bmp5	1	ENSRNOG00000010917	Bmp5	1	--	--	0
Biological process	GO:0010594	regulation of endothelial cell migration	1/44 2.27%	234/18048 1.3%	0.437238	0.517145	ENSRNOG00000062986	Ccbe1	1	ENSRNOG00000062986	Ccbe1	1	--	--	0
Biological process	GO:0014074	response to purine-containing compound	1/44 2.27%	235/18048 1.3%	0.438628	0.517145	ENSRNOG00000020557	Ryr1	1	ENSRNOG00000020557	Ryr1	1	--	--	0
Biological process	GO:0036294	cellular response to decreased oxygen levels	1/44 2.27%	235/18048 1.3%	0.438628	0.517145	ENSRNOG00000011923	Mgarp	1	--	--	0	ENSRNOG00000011923	Mgarp	1
Biological process	GO:1901888	regulation of cell junction assembly	1/44 2.27%	235/18048 1.3%	0.438628	0.517145	ENSRNOG00000007250	Six4	1	--	--	0	ENSRNOG00000007250	Six4	1
Biological process	GO:0046395	carboxylic acid catabolic process	1/44 2.27%	236/18048 1.31%	0.440015	0.518207	ENSRNOG00000001261	Ftcd	1	--	--	0	ENSRNOG00000001261	Ftcd	1
Biological process	GO:0016054	organic acid catabolic process	1/44 2.27%	238/18048 1.32%	0.442778	0.520887	ENSRNOG00000001261	Ftcd	1	--	--	0	ENSRNOG00000001261	Ftcd	1
Cellular component	GO:0099699	integral component of synaptic membrane	1/46 2.17%	232/18303 1.27%	0.444301	0.557554	ENSRNOG00000013829	Chrna3	1	--	--	0	ENSRNOG00000013829	Chrna3	1
Biological process	GO:0001678	cellular glucose homeostasis	1/44 2.27%	242/18048 1.34%	0.448265	0.525603	ENSRNOG00000014288	Fn1	1	ENSRNOG00000014288	Fn1	1	--	--	0
Biological process	GO:0007188	adenylate cyclase-modulating G protein-coupled receptor signaling pathway	1/44 2.27%	242/18048 1.34%	0.448265	0.525603	ENSRNOG00000046468	Ptgfr	1	ENSRNOG00000046468	Ptgfr	1	--	--	0
Biological process	GO:0071322	cellular response to carbohydrate stimulus	1/44 2.27%	242/18048 1.34%	0.448265	0.525603	ENSRNOG00000014288	Fn1	1	ENSRNOG00000014288	Fn1	1	--	--	0
Biological process	GO:0006909	phagocytosis	1/44 2.27%	243/18048 1.35%	0.449628	0.526045	ENSRNOG00000017510	Mfge8	1	ENSRNOG00000017510	Mfge8	1	--	--	0
Biological process	GO:0099504	synaptic vesicle cycle	1/44 2.27%	243/18048 1.35%	0.449628	0.526045	ENSRNOG00000013829	Chrna3	1	--	--	0	ENSRNOG00000013829	Chrna3	1
Biological process	GO:0007204	positive regulation of cytosolic calcium ion concentration	1/44 2.27%	244/18048 1.35%	0.450988	0.526482	ENSRNOG00000046468	Ptgfr	1	ENSRNOG00000046468	Ptgfr	1	--	--	0
Biological process	GO:0019318	hexose metabolic process	1/44 2.27%	244/18048 1.35%	0.450988	0.526482	ENSRNOG00000011823	Tfap2b	1	ENSRNOG00000011823	Tfap2b	1	--	--	0
Cellular component	GO:0030016	myofibril	1/46 2.17%	237/18303 1.29%	0.451338	0.560886	ENSRNOG00000020557	Ryr1	1	ENSRNOG00000020557	Ryr1	1	--	--	0
Biological process	GO:0048839	inner ear development	1/44 2.27%	245/18048 1.36%	0.452345	0.527338	ENSRNOG00000007250	Six4	1	--	--	0	ENSRNOG00000007250	Six4	1
Biological process	GO:0030073	insulin secretion	1/44 2.27%	246/18048 1.36%	0.453699	0.527338	ENSRNOG00000011823	Tfap2b	1	ENSRNOG00000011823	Tfap2b	1	--	--	0
Biological process	GO:0042180	cellular ketone metabolic process	1/44 2.27%	246/18048 1.36%	0.453699	0.527338	ENSRNOG00000010917	Bmp5	1	ENSRNOG00000010917	Bmp5	1	--	--	0
Biological process	GO:0050920	regulation of chemotaxis	1/44 2.27%	246/18048 1.36%	0.453699	0.527338	ENSRNOG00000014288	Fn1	1	ENSRNOG00000014288	Fn1	1	--	--	0
Biological process	GO:0006470	protein dephosphorylation	1/44 2.27%	252/18048 1.4%	0.461751	0.535531	ENSRNOG00000003407	Ptpn14	1	ENSRNOG00000003407	Ptpn14	1	--	--	0
Biological process	GO:1903039	positive regulation of leukocyte cell-cell adhesion	1/44 2.27%	252/18048 1.4%	0.461751	0.535531	ENSRNOG00000023881	Skap1	1	ENSRNOG00000023881	Skap1	1	--	--	0
Biological process	GO:0006959	humoral immune response	1/44 2.27%	253/18048 1.4%	0.463082	0.53591	ENSRNOG00000009434	Inhca	1	ENSRNOG00000009434	Inhca	1	--	--	0
Biological process	GO:2001234	negative regulation of apoptotic signaling pathway	1/44 2.27%	253/18048 1.4%	0.463082	0.53591	ENSRNOG00000005108	Wfs1	1	ENSRNOG00000005108	Wfs1	1	--	--	0
Cellular component	GO:0000793	condensed chromosome	1/46 2.17%	246/18303 1.34%	0.463787	0.564099	ENSRNOG00000012051	Ncaph	1	--	--	0	ENSRNOG00000012051	Ncaph	1
Cellular component	GO:0043292	contractile fiber	1/46 2.17%	247/18303 1.35%	0.465153	0.564099	ENSRNOG00000020557	Ryr1	1	ENSRNOG00000020557	Ryr1	1	--	--	0
Biological process	GO:0021543	pallium development	1/44 2.27%	255/18048 1.41%	0.465734	0.537812	ENSRNOG00000011923	Mgarp	1	--	--	0	ENSRNOG00000011923	Mgarp	1
Biological process	GO:0071453	cellular response to oxygen levels	1/44 2.27%	255/18048 1.41%	0.465734	0.537812	ENSRNOG00000011923	Mgarp	1	--	--	0	ENSRNOG00000011923	Mgarp	1
Biological process	GO:0044403	biological process involved in symbiotic interaction	1/44 2.27%	257/18048 1.42%	0.468373	0.540275	ENSRNOG00000014288	Fn1	1	ENSRNOG00000014288	Fn1	1	--	--	0
Cellular component	GO:0032838	plasma membrane bounded cell projection cytoplasm	1/46 2.17%	251/18303 1.37%	0.470583	0.564099	ENSRNOG00000011923	Mgarp	1	--	--	0	ENSRNOG00000011923	Mgarp	1
Biological process	GO:0033157	regulation of intracellular protein transport	1/44 2.27%	259/18048 1.44%	0.471	0.542132	ENSRNOG00000003407	Ptpn14	1	ENSRNOG00000003407	Ptpn14	1	--	--	0
Biological process	GO:0090276	regulation of peptide hormone secretion	1/44 2.27%	259/18048 1.44%	0.471	0.542132	ENSRNOG00000011823	Tfap2b	1	ENSRNOG00000011823	Tfap2b	1	--	--	0
Cellular component	GO:0099240	intrinsic component of synaptic membrane	1/46 2.17%	252/18303 1.38%	0.471932	0.564099	ENSRNOG00000013829	Chrna3	1	--	--	0	ENSRNOG00000013829	Chrna3	1
Biological process	GO:0002064	epithelial cell development	1/44 2.27%	260/18048 1.44%	0.472308	0.542468	ENSRNOG00000010917	Bmp5	1	ENSRNOG00000010917	Bmp5	1	--	--	0
Biological process	GO:0017157	regulation of exocytosis	1/44 2.27%	260/18048 1.44%	0.472308	0.542468	ENSRNOG00000013829	Chrna3	1	--	--	0	ENSRNOG00000013829	Chrna3	1
Molecular function	GO:1901681	sulfur compound binding	1/40 2.5%	266/16737 1.59%	0.473538	0.50975	ENSRNOG00000014288	Fn1	1	ENSRNOG00000014288	Fn1	1	--	--	0
Biological process	GO:0005996	monosaccharide metabolic process	1/44 2.27%	261/18048 1.45%	0.473613	0.543382	ENSRNOG00000011823	Tfap2b	1	ENSRNOG00000011823	Tfap2b	1	--	--	0
Biological process	GO:0006836	neurotransmitter transport	1/44 2.27%	262/18048 1.45%	0.474916	0.543707	ENSRNOG00000013829	Chrna3	1	--	--	0	ENSRNOG00000013829	Chrna3	1
Biological process	GO:0034976	response to endoplasmic reticulum stress	1/44 2.27%	262/18048 1.45%	0.474916	0.543707	ENSRNOG00000005108	Wfs1	1	ENSRNOG00000005108	Wfs1	1	--	--	0
Cellular component	GO:0031514	motile cilium	1/46 2.17%	255/18303 1.39%	0.475959	0.564099	ENSRNOG00000002571	Tekt5	1	ENSRNOG00000002571	Tekt5	1	--	--	0
Biological process	GO:0002274	myeloid leukocyte activation	1/44 2.27%	263/18048 1.46%	0.476215	0.54376	ENSRNOG00000014288	Fn1	1	ENSRNOG00000014288	Fn1	1	--	--	0
Molecular function	GO:0008017	microtubule binding	1/40 2.5%	269/16737 1.61%	0.477365	0.510864	ENSRNOG00000001261	Ftcd	1	--	--	0	ENSRNOG00000001261	Ftcd	1
Biological process	GO:0002791	regulation of peptide secretion	1/44 2.27%	264/18048 1.46%	0.47751	0.54376	ENSRNOG00000011823	Tfap2b	1	ENSRNOG00000011823	Tfap2b	1	--	--	0
Biological process	GO:0007626	locomotory behavior	1/44 2.27%	264/18048 1.46%	0.47751	0.54376	ENSRNOG00000013829	Chrna3	1	--	--	0	ENSRNOG00000013829	Chrna3	1
Biological process	GO:0032869	cellular response to insulin stimulus	1/44 2.27%	264/18048 1.46%	0.47751	0.54376	ENSRNOG00000013793	C1qtnf9	1	--	--	0	ENSRNOG00000013793	C1qtnf9	1
Biological process	GO:1903320	regulation of protein modification by small protein conjugation or removal	1/44 2.27%	264/18048 1.46%	0.47751	0.54376	ENSRNOG00000005108	Wfs1	1	ENSRNOG00000005108	Wfs1	1	--	--	0
Biological process	GO:0030324	lung development	1/44 2.27%	266/18048 1.47%	0.480093	0.544956	ENSRNOG00000062986	Ccbe1	1	ENSRNOG00000062986	Ccbe1	1	--	--	0
Biological process	GO:0071383	cellular response to steroid hormone stimulus	1/44 2.27%	266/18048 1.47%	0.480093	0.544956	ENSRNOG00000011923	Mgarp	1	--	--	0	ENSRNOG00000011923	Mgarp	1
Biological process	GO:0090087	regulation of peptide transport	1/44 2.27%	266/18048 1.47%	0.480093	0.544956	ENSRNOG00000011823	Tfap2b	1	ENSRNOG00000011823	Tfap2b	1	--	--	0
Biological process	GO:0051321	meiotic cell cycle	1/44 2.27%	268/18048 1.48%	0.482662	0.547291	ENSRNOG00000012051	Ncaph	1	--	--	0	ENSRNOG00000012051	Ncaph	1
Biological process	GO:0030323	respiratory tube development	1/44 2.27%	269/18048 1.49%	0.483943	0.54816	ENSRNOG00000062986	Ccbe1	1	ENSRNOG00000062986	Ccbe1	1	--	--	0
Biological process	GO:0050807	regulation of synapse organization	1/44 2.27%	270/18048 1.5%	0.48522	0.549024	ENSRNOG00000007250	Six4	1	--	--	0	ENSRNOG00000007250	Six4	1
Biological process	GO:0006520	cellular amino acid metabolic process	1/44 2.27%	271/18048 1.5%	0.486494	0.549301	ENSRNOG00000001261	Ftcd	1	--	--	0	ENSRNOG00000001261	Ftcd	1
Biological process	GO:0099003	vesicle-mediated transport in synapse	1/44 2.27%	271/18048 1.5%	0.486494	0.549301	ENSRNOG00000013829	Chrna3	1	--	--	0	ENSRNOG00000013829	Chrna3	1
Cellular component	GO:0008021	synaptic vesicle	1/46 2.17%	263/18303 1.44%	0.486551	0.571363	ENSRNOG00000005108	Wfs1	1	ENSRNOG00000005108	Wfs1	1	--	--	0
Biological process	GO:0045444	fat cell differentiation	1/44 2.27%	275/18048 1.52%	0.491559	0.553848	ENSRNOG00000011823	Tfap2b	1	ENSRNOG00000011823	Tfap2b	1	--	--	0
Biological process	GO:0060348	bone development	1/44 2.27%	275/18048 1.52%	0.491559	0.553848	ENSRNOG00000020557	Ryr1	1	ENSRNOG00000020557	Ryr1	1	--	--	0
Biological process	GO:0048738	cardiac muscle tissue development	1/44 2.27%	276/18048 1.53%	0.492818	0.553997	ENSRNOG00000010917	Bmp5	1	ENSRNOG00000010917	Bmp5	1	--	--	0
Biological process	GO:0090257	regulation of muscle system process	1/44 2.27%	276/18048 1.53%	0.492818	0.553997	ENSRNOG00000013829	Chrna3	1	--	--	0	ENSRNOG00000013829	Chrna3	1
Biological process	GO:0001505	regulation of neurotransmitter levels	1/44 2.27%	277/18048 1.53%	0.494074	0.553997	ENSRNOG00000013829	Chrna3	1	--	--	0	ENSRNOG00000013829	Chrna3	1
Biological process	GO:0090068	positive regulation of cell cycle process	1/44 2.27%	277/18048 1.53%	0.494074	0.553997	ENSRNOG00000012051	Ncaph	1	--	--	0	ENSRNOG00000012051	Ncaph	1
Biological process	GO:0045165	cell fate commitment	1/44 2.27%	278/18048 1.54%	0.495327	0.553997	ENSRNOG00000068029	Six2	1	ENSRNOG00000068029	Six2	1	--	--	0
Biological process	GO:0050803	regulation of synapse structure or activity	1/44 2.27%	278/18048 1.54%	0.495327	0.553997	ENSRNOG00000007250	Six4	1	--	--	0	ENSRNOG00000007250	Six4	1
Biological process	GO:0051091	positive regulation of DNA-binding transcription factor activity	1/44 2.27%	278/18048 1.54%	0.495327	0.553997	ENSRNOG00000022975	Nfam1	1	ENSRNOG00000022975	Nfam1	1	--	--	0
Biological process	GO:0098656	anion transmembrane transport	1/44 2.27%	280/18048 1.55%	0.497823	0.556206	ENSRNOG00000068642	Slc6a20a	1	ENSRNOG00000068642	Slc6a20a	1	--	--	0
Cellular component	GO:0005774	vacuolar membrane	1/46 2.17%	272/18303 1.49%	0.498218	0.579744	ENSRNOG00000014465	Oca2	1	--	--	0	ENSRNOG00000014465	Oca2	1
Molecular function	GO:0008509	anion transmembrane transporter activity	1/40 2.5%	288/16737 1.72%	0.500977	0.533016	ENSRNOG00000068642	Slc6a20a	1	ENSRNOG00000068642	Slc6a20a	1	--	--	0
Biological process	GO:0006650	glycerophospholipid metabolic process	1/44 2.27%	284/18048 1.57%	0.502779	0.56057	ENSRNOG00000026855	Abhd12b	1	--	--	0	ENSRNOG00000026855	Abhd12b	1
Biological process	GO:0098813	nuclear chromosome segregation	1/44 2.27%	284/18048 1.57%	0.502779	0.56057	ENSRNOG00000012051	Ncaph	1	--	--	0	ENSRNOG00000012051	Ncaph	1
Biological process	GO:0043542	endothelial cell migration	1/44 2.27%	288/18048 1.6%	0.507687	0.564862	ENSRNOG00000062986	Ccbe1	1	ENSRNOG00000062986	Ccbe1	1	--	--	0
Biological process	GO:0071560	cellular response to transforming growth factor beta stimulus	1/44 2.27%	288/18048 1.6%	0.507687	0.564862	ENSRNOG00000014288	Fn1	1	ENSRNOG00000014288	Fn1	1	--	--	0
Biological process	GO:0045055	regulated exocytosis	1/44 2.27%	291/18048 1.61%	0.511338	0.56833	ENSRNOG00000013829	Chrna3	1	--	--	0	ENSRNOG00000013829	Chrna3	1
Molecular function	GO:0030674	protein-macromolecule adaptor activity	1/40 2.5%	297/16737 1.77%	0.511796	0.541379	ENSRNOG00000012609	Trdn	1	ENSRNOG00000012609	Trdn	1	--	--	0
Biological process	GO:0014706	striated muscle tissue development	1/44 2.27%	292/18048 1.62%	0.512548	0.568492	ENSRNOG00000010917	Bmp5	1	ENSRNOG00000010917	Bmp5	1	--	--	0
Biological process	GO:0140014	mitotic nuclear division	1/44 2.27%	292/18048 1.62%	0.512548	0.568492	ENSRNOG00000012051	Ncaph	1	--	--	0	ENSRNOG00000012051	Ncaph	1
Biological process	GO:0048588	developmental cell growth	1/44 2.27%	295/18048 1.63%	0.516163	0.571907	ENSRNOG00000014288	Fn1	1	ENSRNOG00000014288	Fn1	1	--	--	0
Biological process	GO:0071559	response to transforming growth factor beta	1/44 2.27%	296/18048 1.64%	0.517363	0.572641	ENSRNOG00000014288	Fn1	1	ENSRNOG00000014288	Fn1	1	--	--	0
Biological process	GO:0042113	B cell activation	1/44 2.27%	297/18048 1.65%	0.518559	0.57337	ENSRNOG00000022975	Nfam1	1	ENSRNOG00000022975	Nfam1	1	--	--	0
Molecular function	GO:0031625	ubiquitin protein ligase binding	1/40 2.5%	303/16737 1.81%	0.518881	0.545719	ENSRNOG00000005108	Wfs1	1	ENSRNOG00000005108	Wfs1	1	--	--	0
Cellular component	GO:0099568	cytoplasmic region	1/46 2.17%	292/18303 1.6%	0.523222	0.603355	ENSRNOG00000011923	Mgarp	1	--	--	0	ENSRNOG00000011923	Mgarp	1
Biological process	GO:0071695	anatomical structure maturation	1/44 2.27%	301/18048 1.67%	0.523315	0.57803	ENSRNOG00000020557	Ryr1	1	ENSRNOG00000020557	Ryr1	1	--	--	0
Biological process	GO:0006605	protein targeting	1/44 2.27%	304/18048 1.68%	0.526852	0.580735	ENSRNOG00000011923	Mgarp	1	--	--	0	ENSRNOG00000011923	Mgarp	1
Biological process	GO:0022409	positive regulation of cell-cell adhesion	1/44 2.27%	304/18048 1.68%	0.526852	0.580735	ENSRNOG00000023881	Skap1	1	ENSRNOG00000023881	Skap1	1	--	--	0
Biological process	GO:0031647	regulation of protein stability	1/44 2.27%	307/18048 1.7%	0.530363	0.584002	ENSRNOG00000005108	Wfs1	1	ENSRNOG00000005108	Wfs1	1	--	--	0
Biological process	GO:0051384	response to glucocorticoid	1/44 2.27%	308/18048 1.71%	0.531528	0.584681	ENSRNOG00000014288	Fn1	1	ENSRNOG00000014288	Fn1	1	--	--	0
Molecular function	GO:0046982	protein heterodimerization activity	1/40 2.5%	314/16737 1.88%	0.53161	0.555912	ENSRNOG00000011823	Tfap2b	1	ENSRNOG00000011823	Tfap2b	1	--	--	0
Biological process	GO:0010632	regulation of epithelial cell migration	1/44 2.27%	309/18048 1.71%	0.53269	0.585356	ENSRNOG00000062986	Ccbe1	1	ENSRNOG00000062986	Ccbe1	1	--	--	0
Biological process	GO:0050769	positive regulation of neurogenesis	1/44 2.27%	312/18048 1.73%	0.536159	0.587956	ENSRNOG00000014288	Fn1	1	ENSRNOG00000014288	Fn1	1	--	--	0
Biological process	GO:0072659	protein localization to plasma membrane	1/44 2.27%	312/18048 1.73%	0.536159	0.587956	ENSRNOG00000023881	Skap1	1	ENSRNOG00000023881	Skap1	1	--	--	0
Biological process	GO:0009749	response to glucose	1/44 2.27%	313/18048 1.73%	0.53731	0.58801	ENSRNOG00000014288	Fn1	1	ENSRNOG00000014288	Fn1	1	--	--	0
Biological process	GO:0030072	peptide hormone secretion	1/44 2.27%	313/18048 1.73%	0.53731	0.58801	ENSRNOG00000011823	Tfap2b	1	ENSRNOG00000011823	Tfap2b	1	--	--	0
Biological process	GO:0097193	intrinsic apoptotic signaling pathway	1/44 2.27%	314/18048 1.74%	0.538458	0.588662	ENSRNOG00000005108	Wfs1	1	ENSRNOG00000005108	Wfs1	1	--	--	0
Molecular function	GO:0044389	ubiquitin-like protein ligase binding	1/40 2.5%	321/16737 1.92%	0.539539	0.560998	ENSRNOG00000005108	Wfs1	1	ENSRNOG00000005108	Wfs1	1	--	--	0
Biological process	GO:0046942	carboxylic acid transport	1/44 2.27%	315/18048 1.75%	0.539603	0.58931	ENSRNOG00000068642	Slc6a20a	1	ENSRNOG00000068642	Slc6a20a	1	--	--	0
Biological process	GO:0007584	response to nutrient	1/44 2.27%	320/18048 1.77%	0.545287	0.594909	ENSRNOG00000061215	Crym	1	ENSRNOG00000061215	Crym	1	--	--	0
Biological process	GO:0002790	peptide secretion	1/44 2.27%	321/18048 1.78%	0.546415	0.595531	ENSRNOG00000011823	Tfap2b	1	ENSRNOG00000011823	Tfap2b	1	--	--	0
Biological process	GO:0071222	cellular response to lipopolysaccharide	1/44 2.27%	322/18048 1.78%	0.547541	0.59615	ENSRNOG00000014288	Fn1	1	ENSRNOG00000014288	Fn1	1	--	--	0
Biological process	GO:0009746	response to hexose	1/44 2.27%	326/18048 1.81%	0.552017	0.60041	ENSRNOG00000014288	Fn1	1	ENSRNOG00000014288	Fn1	1	--	--	0
Cellular component	GO:0070382	exocytic vesicle	1/46 2.17%	318/18303 1.74%	0.553912	0.631308	ENSRNOG00000005108	Wfs1	1	ENSRNOG00000005108	Wfs1	1	--	--	0
Biological process	GO:0015850	organic hydroxy compound transport	1/44 2.27%	328/18048 1.82%	0.554239	0.602213	ENSRNOG00000029811	Kcne2	1	--	--	0	ENSRNOG00000029811	Kcne2	1
Biological process	GO:0050708	regulation of protein secretion	1/44 2.27%	329/18048 1.82%	0.555346	0.602802	ENSRNOG00000011823	Tfap2b	1	ENSRNOG00000011823	Tfap2b	1	--	--	0
Cellular component	GO:0045211	postsynaptic membrane	1/46 2.17%	321/18303 1.75%	0.557326	0.631308	ENSRNOG00000013829	Chrna3	1	--	--	0	ENSRNOG00000013829	Chrna3	1
Biological process	GO:0046883	regulation of hormone secretion	1/44 2.27%	331/18048 1.83%	0.557552	0.604544	ENSRNOG00000011823	Tfap2b	1	ENSRNOG00000011823	Tfap2b	1	--	--	0
Biological process	GO:0009895	negative regulation of catabolic process	1/44 2.27%	332/18048 1.84%	0.558651	0.604544	ENSRNOG00000026661	Hcar1	1	ENSRNOG00000026661	Hcar1	1	--	--	0
Biological process	GO:0031099	regeneration	1/44 2.27%	332/18048 1.84%	0.558651	0.604544	ENSRNOG00000016437	Tm4sf4	1	--	--	0	ENSRNOG00000016437	Tm4sf4	1
Biological process	GO:1902105	regulation of leukocyte differentiation	1/44 2.27%	334/18048 1.85%	0.56084	0.606298	ENSRNOG00000022975	Nfam1	1	ENSRNOG00000022975	Nfam1	1	--	--	0
Biological process	GO:0071219	cellular response to molecule of bacterial origin	1/44 2.27%	337/18048 1.87%	0.564105	0.60921	ENSRNOG00000014288	Fn1	1	ENSRNOG00000014288	Fn1	1	--	--	0
Biological process	GO:0007059	chromosome segregation	1/44 2.27%	340/18048 1.88%	0.567346	0.61078	ENSRNOG00000012051	Ncaph	1	--	--	0	ENSRNOG00000012051	Ncaph	1
Biological process	GO:0031960	response to corticosteroid	1/44 2.27%	340/18048 1.88%	0.567346	0.61078	ENSRNOG00000014288	Fn1	1	ENSRNOG00000014288	Fn1	1	--	--	0
Biological process	GO:0042742	defense response to bacterium	1/44 2.27%	340/18048 1.88%	0.567346	0.61078	ENSRNOG00000009434	Inhca	1	ENSRNOG00000009434	Inhca	1	--	--	0
Biological process	GO:0019932	second-messenger-mediated signaling	1/44 2.27%	341/18048 1.89%	0.568421	0.61078	ENSRNOG00000046468	Ptgfr	1	ENSRNOG00000046468	Ptgfr	1	--	--	0
Biological process	GO:0022604	regulation of cell morphogenesis	1/44 2.27%	341/18048 1.89%	0.568421	0.61078	ENSRNOG00000014288	Fn1	1	ENSRNOG00000014288	Fn1	1	--	--	0
Biological process	GO:0015833	peptide transport	1/44 2.27%	343/18048 1.9%	0.570563	0.611235	ENSRNOG00000011823	Tfap2b	1	ENSRNOG00000011823	Tfap2b	1	--	--	0
Biological process	GO:0034284	response to monosaccharide	1/44 2.27%	343/18048 1.9%	0.570563	0.611235	ENSRNOG00000014288	Fn1	1	ENSRNOG00000014288	Fn1	1	--	--	0
Biological process	GO:0070372	regulation of ERK1 and ERK2 cascade	1/44 2.27%	343/18048 1.9%	0.570563	0.611235	ENSRNOG00000014288	Fn1	1	ENSRNOG00000014288	Fn1	1	--	--	0
Cellular component	GO:0005938	cell cortex	1/46 2.17%	333/18303 1.82%	0.57073	0.640819	ENSRNOG00000020557	Ryr1	1	ENSRNOG00000020557	Ryr1	1	--	--	0
Biological process	GO:0008202	steroid metabolic process	1/44 2.27%	344/18048 1.91%	0.57163	0.611765	ENSRNOG00000010917	Bmp5	1	ENSRNOG00000010917	Bmp5	1	--	--	0
Biological process	GO:0015849	organic acid transport	1/44 2.27%	348/18048 1.93%	0.575873	0.615688	ENSRNOG00000068642	Slc6a20a	1	ENSRNOG00000068642	Slc6a20a	1	--	--	0
Biological process	GO:0034599	cellular response to oxidative stress	1/44 2.27%	349/18048 1.93%	0.576927	0.616198	ENSRNOG00000011719	Ngb	1	--	--	0	ENSRNOG00000011719	Ngb	1
Biological process	GO:0016311	dephosphorylation	1/44 2.27%	353/18048 1.96%	0.581119	0.620054	ENSRNOG00000003407	Ptpn14	1	ENSRNOG00000003407	Ptpn14	1	--	--	0
Biological process	GO:0021700	developmental maturation	1/44 2.27%	356/18048 1.97%	0.584236	0.622757	ENSRNOG00000020557	Ryr1	1	ENSRNOG00000020557	Ryr1	1	--	--	0
Biological process	GO:0060271	cilium assembly	1/44 2.27%	358/18048 1.98%	0.586302	0.624335	ENSRNOG00000002571	Tekt5	1	ENSRNOG00000002571	Tekt5	1	--	--	0
Molecular function	GO:0060090	molecular adaptor activity	1/40 2.5%	365/16737 2.18%	0.586464	0.606345	ENSRNOG00000012609	Trdn	1	ENSRNOG00000012609	Trdn	1	--	--	0
Biological process	GO:1903037	regulation of leukocyte cell-cell adhesion	1/44 2.27%	360/18048 1.99%	0.588357	0.6259	ENSRNOG00000023881	Skap1	1	ENSRNOG00000023881	Skap1	1	--	--	0
Biological process	GO:0045765	regulation of angiogenesis	1/44 2.27%	362/18048 2.01%	0.590403	0.62745	ENSRNOG00000062986	Ccbe1	1	ENSRNOG00000062986	Ccbe1	1	--	--	0
Biological process	GO:0032868	response to insulin	1/44 2.27%	365/18048 2.02%	0.593452	0.629334	ENSRNOG00000013793	C1qtnf9	1	--	--	0	ENSRNOG00000013793	C1qtnf9	1
Biological process	GO:0071216	cellular response to biotic stimulus	1/44 2.27%	365/18048 2.02%	0.593452	0.629334	ENSRNOG00000014288	Fn1	1	ENSRNOG00000014288	Fn1	1	--	--	0
Cellular component	GO:0005769	early endosome	1/46 2.17%	355/18303 1.94%	0.594279	0.661458	ENSRNOG00000009434	Inhca	1	ENSRNOG00000009434	Inhca	1	--	--	0
Biological process	GO:0021537	telencephalon development	1/44 2.27%	367/18048 2.03%	0.595473	0.629334	ENSRNOG00000011923	Mgarp	1	--	--	0	ENSRNOG00000011923	Mgarp	1
Biological process	GO:0044282	small molecule catabolic process	1/44 2.27%	367/18048 2.03%	0.595473	0.629334	ENSRNOG00000001261	Ftcd	1	--	--	0	ENSRNOG00000001261	Ftcd	1
Biological process	GO:1901342	regulation of vasculature development	1/44 2.27%	367/18048 2.03%	0.595473	0.629334	ENSRNOG00000062986	Ccbe1	1	ENSRNOG00000062986	Ccbe1	1	--	--	0
Biological process	GO:0006066	alcohol metabolic process	1/44 2.27%	369/18048 2.04%	0.597484	0.629334	ENSRNOG00000010917	Bmp5	1	ENSRNOG00000010917	Bmp5	1	--	--	0
Biological process	GO:0042176	regulation of protein catabolic process	1/44 2.27%	369/18048 2.04%	0.597484	0.629334	ENSRNOG00000029811	Kcne2	1	--	--	0	ENSRNOG00000029811	Kcne2	1
Biological process	GO:0045787	positive regulation of cell cycle	1/44 2.27%	369/18048 2.04%	0.597484	0.629334	ENSRNOG00000012051	Ncaph	1	--	--	0	ENSRNOG00000012051	Ncaph	1
Biological process	GO:0070371	ERK1 and ERK2 cascade	1/44 2.27%	369/18048 2.04%	0.597484	0.629334	ENSRNOG00000014288	Fn1	1	ENSRNOG00000014288	Fn1	1	--	--	0
Biological process	GO:0001933	negative regulation of protein phosphorylation	1/44 2.27%	370/18048 2.05%	0.598486	0.629577	ENSRNOG00000052061	Ppef2	1	--	--	0	ENSRNOG00000052061	Ppef2	1
Biological process	GO:0001818	negative regulation of cytokine production	1/44 2.27%	371/18048 2.06%	0.599485	0.629577	ENSRNOG00000014288	Fn1	1	ENSRNOG00000014288	Fn1	1	--	--	0
Biological process	GO:0007281	germ cell development	1/44 2.27%	371/18048 2.06%	0.599485	0.629577	ENSRNOG00000014465	Oca2	1	--	--	0	ENSRNOG00000014465	Oca2	1
Biological process	GO:0006644	phospholipid metabolic process	1/44 2.27%	372/18048 2.06%	0.600482	0.630004	ENSRNOG00000026855	Abhd12b	1	--	--	0	ENSRNOG00000026855	Abhd12b	1
Biological process	GO:0051962	positive regulation of nervous system development	1/44 2.27%	373/18048 2.07%	0.601477	0.630428	ENSRNOG00000014288	Fn1	1	ENSRNOG00000014288	Fn1	1	--	--	0
Molecular function	GO:0015631	tubulin binding	1/40 2.5%	381/16737 2.28%	0.602344	0.619264	ENSRNOG00000001261	Ftcd	1	--	--	0	ENSRNOG00000001261	Ftcd	1
Biological process	GO:0032386	regulation of intracellular transport	1/44 2.27%	377/18048 2.09%	0.60543	0.633949	ENSRNOG00000003407	Ptpn14	1	ENSRNOG00000003407	Ptpn14	1	--	--	0
Molecular function	GO:0004857	enzyme inhibitor activity	1/40 2.5%	386/16737 2.31%	0.607184	0.620752	ENSRNOG00000009434	Inhca	1	ENSRNOG00000009434	Inhca	1	--	--	0
Biological process	GO:0042886	amide transport	1/44 2.27%	379/18048 2.1%	0.607393	0.635381	ENSRNOG00000011823	Tfap2b	1	ENSRNOG00000011823	Tfap2b	1	--	--	0
Cellular component	GO:0010008	endosome membrane	1/46 2.17%	368/18303 2.01%	0.607596	0.67045	ENSRNOG00000014465	Oca2	1	--	--	0	ENSRNOG00000014465	Oca2	1
Biological process	GO:0062012	regulation of small molecule metabolic process	1/44 2.27%	380/18048 2.11%	0.608371	0.63578	ENSRNOG00000010917	Bmp5	1	ENSRNOG00000010917	Bmp5	1	--	--	0
Biological process	GO:0009743	response to carbohydrate	1/44 2.27%	382/18048 2.12%	0.610319	0.636569	ENSRNOG00000014288	Fn1	1	ENSRNOG00000014288	Fn1	1	--	--	0
Biological process	GO:1990778	protein localization to cell periphery	1/44 2.27%	382/18048 2.12%	0.610319	0.636569	ENSRNOG00000023881	Skap1	1	ENSRNOG00000023881	Skap1	1	--	--	0
Biological process	GO:0071900	regulation of protein serine/threonine kinase activity	1/44 2.27%	384/18048 2.13%	0.612258	0.637729	ENSRNOG00000013793	C1qtnf9	1	--	--	0	ENSRNOG00000013793	C1qtnf9	1
Biological process	GO:0010631	epithelial cell migration	1/44 2.27%	385/18048 2.13%	0.613224	0.637729	ENSRNOG00000062986	Ccbe1	1	ENSRNOG00000062986	Ccbe1	1	--	--	0
Biological process	GO:0046486	glycerolipid metabolic process	1/44 2.27%	385/18048 2.13%	0.613224	0.637729	ENSRNOG00000026855	Abhd12b	1	--	--	0	ENSRNOG00000026855	Abhd12b	1
Biological process	GO:0090132	epithelium migration	1/44 2.27%	387/18048 2.14%	0.615148	0.639107	ENSRNOG00000062986	Ccbe1	1	ENSRNOG00000062986	Ccbe1	1	--	--	0
Molecular function	GO:0033218	amide binding	1/40 2.5%	397/16737 2.37%	0.617629	0.627923	ENSRNOG00000001261	Ftcd	1	--	--	0	ENSRNOG00000001261	Ftcd	1
Biological process	GO:0015711	organic anion transport	1/44 2.27%	390/18048 2.16%	0.618018	0.641464	ENSRNOG00000068642	Slc6a20a	1	ENSRNOG00000068642	Slc6a20a	1	--	--	0
Biological process	GO:0140694	non-membrane-bounded organelle assembly	1/44 2.27%	391/18048 2.17%	0.618969	0.641827	ENSRNOG00000007250	Six4	1	--	--	0	ENSRNOG00000007250	Six4	1
Biological process	GO:0044782	cilium organization	1/44 2.27%	392/18048 2.17%	0.619919	0.642188	ENSRNOG00000002571	Tekt5	1	ENSRNOG00000002571	Tekt5	1	--	--	0
Biological process	GO:0090130	tissue migration	1/44 2.27%	394/18048 2.18%	0.621811	0.643523	ENSRNOG00000062986	Ccbe1	1	ENSRNOG00000062986	Ccbe1	1	--	--	0
Biological process	GO:0046879	hormone secretion	1/44 2.27%	397/18048 2.2%	0.624632	0.645816	ENSRNOG00000011823	Tfap2b	1	ENSRNOG00000011823	Tfap2b	1	--	--	0
Biological process	GO:0010720	positive regulation of cell development	1/44 2.27%	398/18048 2.21%	0.625568	0.646157	ENSRNOG00000014288	Fn1	1	ENSRNOG00000014288	Fn1	1	--	--	0
Cellular component	GO:0016607	nuclear speck	1/46 2.17%	388/18303 2.12%	0.627252	0.685574	ENSRNOG00000013829	Chrna3	1	--	--	0	ENSRNOG00000013829	Chrna3	1
Biological process	GO:0007159	leukocyte cell-cell adhesion	1/44 2.27%	400/18048 2.22%	0.627432	0.647457	ENSRNOG00000023881	Skap1	1	ENSRNOG00000023881	Skap1	1	--	--	0
Cellular component	GO:0005743	mitochondrial inner membrane	1/46 2.17%	393/18303 2.15%	0.632013	0.685574	ENSRNOG00000011923	Mgarp	1	--	--	0	ENSRNOG00000011923	Mgarp	1
Biological process	GO:0042063	gliogenesis	1/44 2.27%	405/18048 2.24%	0.632054	0.651596	ENSRNOG00000014288	Fn1	1	ENSRNOG00000014288	Fn1	1	--	--	0
Biological process	GO:0002250	adaptive immune response	1/44 2.27%	409/18048 2.27%	0.635711	0.654733	ENSRNOG00000023881	Skap1	1	ENSRNOG00000023881	Skap1	1	--	--	0
Biological process	GO:0006887	exocytosis	1/44 2.27%	413/18048 2.29%	0.639333	0.657828	ENSRNOG00000013829	Chrna3	1	--	--	0	ENSRNOG00000013829	Chrna3	1
Molecular function	GO:0030695	GTPase regulator activity	1/40 2.5%	421/16737 2.52%	0.639488	0.643001	ENSRNOG00000030568	Rgs12	1	ENSRNOG00000030568	Rgs12	1	--	--	0
Molecular function	GO:0060589	nucleoside-triphosphatase regulator activity	1/40 2.5%	421/16737 2.52%	0.639488	0.643001	ENSRNOG00000030568	Rgs12	1	ENSRNOG00000030568	Rgs12	1	--	--	0
Biological process	GO:0042326	negative regulation of phosphorylation	1/44 2.27%	416/18048 2.3%	0.642026	0.659963	ENSRNOG00000052061	Ppef2	1	--	--	0	ENSRNOG00000052061	Ppef2	1
Biological process	GO:2001233	regulation of apoptotic signaling pathway	1/44 2.27%	417/18048 2.31%	0.642919	0.660245	ENSRNOG00000005108	Wfs1	1	ENSRNOG00000005108	Wfs1	1	--	--	0
Biological process	GO:0043010	camera-type eye development	1/44 2.27%	420/18048 2.33%	0.645586	0.661981	ENSRNOG00000011823	Tfap2b	1	ENSRNOG00000011823	Tfap2b	1	--	--	0
Biological process	GO:0051656	establishment of organelle localization	1/44 2.27%	421/18048 2.33%	0.646471	0.661981	ENSRNOG00000011923	Mgarp	1	--	--	0	ENSRNOG00000011923	Mgarp	1
Biological process	GO:0062197	cellular response to chemical stress	1/44 2.27%	421/18048 2.33%	0.646471	0.661981	ENSRNOG00000011719	Ngb	1	--	--	0	ENSRNOG00000011719	Ngb	1
Biological process	GO:0009306	protein secretion	1/44 2.27%	423/18048 2.34%	0.648233	0.662514	ENSRNOG00000011823	Tfap2b	1	ENSRNOG00000011823	Tfap2b	1	--	--	0
Biological process	GO:1903706	regulation of hemopoiesis	1/44 2.27%	423/18048 2.34%	0.648233	0.662514	ENSRNOG00000022975	Nfam1	1	ENSRNOG00000022975	Nfam1	1	--	--	0
Biological process	GO:0035592	establishment of protein localization to extracellular region	1/44 2.27%	425/18048 2.35%	0.649988	0.663671	ENSRNOG00000011823	Tfap2b	1	ENSRNOG00000011823	Tfap2b	1	--	--	0
Biological process	GO:0030098	lymphocyte differentiation	1/44 2.27%	426/18048 2.36%	0.650861	0.663928	ENSRNOG00000022975	Nfam1	1	ENSRNOG00000022975	Nfam1	1	--	--	0
Biological process	GO:0043161	proteasome-mediated ubiquitin-dependent protein catabolic process	1/44 2.27%	427/18048 2.37%	0.651733	0.664183	ENSRNOG00000005108	Wfs1	1	ENSRNOG00000005108	Wfs1	1	--	--	0
Biological process	GO:0071692	protein localization to extracellular region	1/44 2.27%	431/18048 2.39%	0.655199	0.667078	ENSRNOG00000011823	Tfap2b	1	ENSRNOG00000011823	Tfap2b	1	--	--	0
Biological process	GO:0006631	fatty acid metabolic process	1/44 2.27%	437/18048 2.42%	0.660335	0.671665	ENSRNOG00000013793	C1qtnf9	1	--	--	0	ENSRNOG00000013793	C1qtnf9	1
Biological process	GO:0043254	regulation of protein-containing complex assembly	1/44 2.27%	438/18048 2.43%	0.661183	0.671888	ENSRNOG00000023881	Skap1	1	ENSRNOG00000023881	Skap1	1	--	--	0
Biological process	GO:0016055	Wnt signaling pathway	1/44 2.27%	443/18048 2.45%	0.665395	0.675525	ENSRNOG00000008947	Cpz	1	ENSRNOG00000008947	Cpz	1	--	--	0
Cellular component	GO:0014069	postsynaptic density	1/46 2.17%	430/18303 2.35%	0.665446	0.706947	ENSRNOG00000013829	Chrna3	1	--	--	0	ENSRNOG00000013829	Chrna3	1
Cellular component	GO:0030133	transport vesicle	1/46 2.17%	431/18303 2.35%	0.666307	0.706947	ENSRNOG00000005108	Wfs1	1	ENSRNOG00000005108	Wfs1	1	--	--	0
Biological process	GO:0198738	cell-cell signaling by wnt	1/44 2.27%	446/18048 2.47%	0.667898	0.677421	ENSRNOG00000008947	Cpz	1	ENSRNOG00000008947	Cpz	1	--	--	0
Cellular component	GO:0032279	asymmetric synapse	1/46 2.17%	437/18303 2.39%	0.671428	0.706947	ENSRNOG00000013829	Chrna3	1	--	--	0	ENSRNOG00000013829	Chrna3	1
Cellular component	GO:0000139	Golgi membrane	1/46 2.17%	440/18303 2.4%	0.67396	0.706947	ENSRNOG00000001261	Ftcd	1	--	--	0	ENSRNOG00000001261	Ftcd	1
Biological process	GO:0000280	nuclear division	1/44 2.27%	456/18048 2.53%	0.676109	0.685098	ENSRNOG00000012051	Ncaph	1	--	--	0	ENSRNOG00000012051	Ncaph	1
Molecular function	GO:0005543	phospholipid binding	1/40 2.5%	466/16737 2.78%	0.677236	0.677236	ENSRNOG00000017510	Mfge8	1	ENSRNOG00000017510	Mfge8	1	--	--	0
Biological process	GO:0001558	regulation of cell growth	1/44 2.27%	460/18048 2.55%	0.679338	0.687716	ENSRNOG00000014288	Fn1	1	ENSRNOG00000014288	Fn1	1	--	--	0
Biological process	GO:0042060	wound healing	1/44 2.27%	461/18048 2.55%	0.68014	0.687876	ENSRNOG00000014288	Fn1	1	ENSRNOG00000014288	Fn1	1	--	--	0
Cellular component	GO:0019866	organelle inner membrane	1/46 2.17%	451/18303 2.46%	0.68308	0.706947	ENSRNOG00000011923	Mgarp	1	--	--	0	ENSRNOG00000011923	Mgarp	1
Biological process	GO:0001654	eye development	1/44 2.27%	469/18048 2.6%	0.686487	0.693638	ENSRNOG00000011823	Tfap2b	1	ENSRNOG00000011823	Tfap2b	1	--	--	0
Biological process	GO:0032103	positive regulation of response to external stimulus	1/44 2.27%	472/18048 2.62%	0.688836	0.694695	ENSRNOG00000014288	Fn1	1	ENSRNOG00000014288	Fn1	1	--	--	0
Biological process	GO:0150063	visual system development	1/44 2.27%	472/18048 2.62%	0.688836	0.694695	ENSRNOG00000011823	Tfap2b	1	ENSRNOG00000011823	Tfap2b	1	--	--	0
Biological process	GO:0048880	sensory system development	1/44 2.27%	477/18048 2.64%	0.692711	0.696746	ENSRNOG00000011823	Tfap2b	1	ENSRNOG00000011823	Tfap2b	1	--	--	0
Biological process	GO:0010563	negative regulation of phosphorus metabolic process	1/44 2.27%	478/18048 2.65%	0.693481	0.696746	ENSRNOG00000052061	Ppef2	1	--	--	0	ENSRNOG00000052061	Ppef2	1
Biological process	GO:0045936	negative regulation of phosphate metabolic process	1/44 2.27%	478/18048 2.65%	0.693481	0.696746	ENSRNOG00000052061	Ppef2	1	--	--	0	ENSRNOG00000052061	Ppef2	1
Biological process	GO:0050767	regulation of neurogenesis	1/44 2.27%	478/18048 2.65%	0.693481	0.696746	ENSRNOG00000014288	Fn1	1	ENSRNOG00000014288	Fn1	1	--	--	0
Cellular component	GO:0098984	neuron to neuron synapse	1/46 2.17%	465/18303 2.54%	0.694327	0.706947	ENSRNOG00000013829	Chrna3	1	--	--	0	ENSRNOG00000013829	Chrna3	1
Cellular component	GO:0099572	postsynaptic specialization	1/46 2.17%	465/18303 2.54%	0.694327	0.706947	ENSRNOG00000013829	Chrna3	1	--	--	0	ENSRNOG00000013829	Chrna3	1
Cellular component	GO:0097060	synaptic membrane	1/46 2.17%	467/18303 2.55%	0.695901	0.706947	ENSRNOG00000013829	Chrna3	1	--	--	0	ENSRNOG00000013829	Chrna3	1
Biological process	GO:1903131	mononuclear cell differentiation	1/44 2.27%	484/18048 2.68%	0.698058	0.700685	ENSRNOG00000022975	Nfam1	1	ENSRNOG00000022975	Nfam1	1	--	--	0
Biological process	GO:0022407	regulation of cell-cell adhesion	1/44 2.27%	486/18048 2.69%	0.699569	0.701542	ENSRNOG00000023881	Skap1	1	ENSRNOG00000023881	Skap1	1	--	--	0
Biological process	GO:0052547	regulation of peptidase activity	1/44 2.27%	489/18048 2.71%	0.701822	0.70314	ENSRNOG00000014288	Fn1	1	ENSRNOG00000014288	Fn1	1	--	--	0
Biological process	GO:0051301	cell division	1/44 2.27%	495/18048 2.74%	0.706278	0.70694	ENSRNOG00000012051	Ncaph	1	--	--	0	ENSRNOG00000012051	Ncaph	1
Biological process	GO:0007409	axonogenesis	1/44 2.27%	499/18048 2.76%	0.709212	0.709212	ENSRNOG00000014288	Fn1	1	ENSRNOG00000014288	Fn1	1	--	--	0
Cellular component	GO:0000323	lytic vacuole	1/46 2.17%	493/18303 2.69%	0.715662	0.715662	ENSRNOG00000014465	Oca2	1	--	--	0	ENSRNOG00000014465	Oca2	1
Cellular component	GO:0005764	lysosome	1/46 2.17%	493/18303 2.69%	0.715662	0.715662	ENSRNOG00000014465	Oca2	1	--	--	0	ENSRNOG00000014465	Oca2	1
