# Supplementary material for: Neuroprotective effects of ethanol extraction from Rubia yunnanensis Diels on chronic cerebral hypoperfusion: modulation of the System Xc-/GSH/GPX4 axis to alleviate oxidative stress and ferroptosis
Source: Front Pharmacol. 2025 Feb 25;16:1552228. doi: 10.3389/fphar.2025.1552228 (PMC11893507; doi:10.3389/fphar.2025.1552228)
Supplement: Supplementary file 3 [file Table6.XLSX]

## Sheet: Sheet1
Kegg_level_1	Kegg_pathway	ko_ID	Cluster_frequency	Metabolome_frequency	P-value	Up_num	Down_num
Metabolism	Fatty acid biosynthesis	ko00061	3 out of 55 5.45454545454545%	5 out of 817 0.611995104039168%	0.00262645	2	1
Metabolism	Biosynthesis of unsaturated fatty acids	ko01040	3 out of 55 5.45454545454545%	8 out of 817 0.979192166462668%	0.0127078	3	0
Human Diseases	Choline metabolism in cancer	ko05231	10 out of 55 18.1818181818182%	83 out of 817 10.1591187270502%	0.0426772	8	2
Cellular Processes	Ferroptosis	ko04216	2 out of 55 3.63636363636364%	6 out of 817 0.734394124847001%	0.0460414	2	0
Metabolism	Cysteine and methionine metabolism	ko00270	4 out of 55 7.27272727272727%	26 out of 817 3.18237454100367%	0.0907033	4	0
Metabolism	Pyrimidine metabolism	ko00240	4 out of 55 7.27272727272727%	27 out of 817 3.30477356181151%	0.10132	4	0
Metabolism	Glycerophospholipid metabolism	ko00564	13 out of 55 23.6363636363636%	138 out of 817 16.891064871481%	0.118	11	2
Metabolism	Riboflavin metabolism	ko00740	2 out of 55 3.63636363636364%	9 out of 817 1.1015911872705%	0.118147	2	0
Metabolism	Glutathione metabolism	ko00480	2 out of 55 3.63636363636364%	10 out of 817 1.22399020807834%	0.141504	2	0
Metabolism	Arachidonic acid metabolism	ko00590	5 out of 55 9.09090909090909%	43 out of 817 5.26315789473684%	0.155726	3	2
Metabolism	Arginine biosynthesis	ko00220	2 out of 55 3.63636363636364%	11 out of 817 1.34638922888617%	0.165753	2	0
Metabolism	Metabolic pathways	ko01100	34 out of 55 61.8181818181818%	447 out of 817 54.7123623011016%	0.169664	25	9
Metabolism	alpha-Linolenic acid metabolism	ko00592	4 out of 55 7.27272727272727%	33 out of 817 4.03916768665851%	0.175781	2	2
Metabolism	Fatty acid metabolism	ko01212	1 out of 55 1.81818181818182%	3 out of 817 0.367197062423501%	0.188883	1	0
Metabolism	Linoleic acid metabolism	ko00591	4 out of 55 7.27272727272727%	35 out of 817 4.28396572827417%	0.20401	2	2
Metabolism	Biosynthesis of nucleotide sugars	ko01250	3 out of 55 5.45454545454545%	24 out of 817 2.937576499388%	0.215213	1	2
Organismal Systems	Vitamin digestion and absorption	ko04977	3 out of 55 5.45454545454545%	25 out of 817 3.05997552019584%	0.233561	3	0
Metabolism	Histidine metabolism	ko00340	2 out of 55 3.63636363636364%	14 out of 817 1.71358629130967%	0.241763	1	1
Organismal Systems	C-type lectin receptor signaling pathway	ko04625	1 out of 55 1.81818181818182%	4 out of 817 0.489596083231334%	0.243688	0	1
Human Diseases	Chemical carcinogenesis - reactive oxygen species	ko05208	1 out of 55 1.81818181818182%	4 out of 817 0.489596083231334%	0.243688	1	0
Metabolism	Fatty acid elongation	ko00062	1 out of 55 1.81818181818182%	4 out of 817 0.489596083231334%	0.243688	1	0
Environmental Information Processing	Phosphatidylinositol signaling system	ko04070	1 out of 55 1.81818181818182%	4 out of 817 0.489596083231334%	0.243688	1	0
Metabolism	Primary bile acid biosynthesis	ko00120	1 out of 55 1.81818181818182%	5 out of 817 0.611995104039168%	0.294853	0	1
Metabolism	Biotin metabolism	ko00780	1 out of 55 1.81818181818182%	5 out of 817 0.611995104039168%	0.294853	1	0
Organismal Systems	Retrograde endocannabinoid signaling	ko04723	4 out of 55 7.27272727272727%	42 out of 817 5.14075887392901%	0.311183	2	2
Metabolism	Biosynthesis of amino acids	ko01230	5 out of 55 9.09090909090909%	57 out of 817 6.97674418604651%	0.336405	5	0
Organismal Systems	Thyroid hormone synthesis	ko04918	1 out of 55 1.81818181818182%	6 out of 817 0.734394124847001%	0.342616	1	0
Metabolism	Arginine and proline metabolism	ko00330	2 out of 55 3.63636363636364%	18 out of 817 2.203182374541%	0.344795	2	0
Metabolism	Inositol phosphate metabolism	ko00562	1 out of 55 1.81818181818182%	7 out of 817 0.856793145654835%	0.387198	1	0
Metabolism	Fatty acid degradation	ko00071	1 out of 55 1.81818181818182%	7 out of 817 0.856793145654835%	0.387198	1	0
Metabolism	Amino sugar and nucleotide sugar metabolism	ko00520	2 out of 55 3.63636363636364%	21 out of 817 2.5703794369645%	0.41943	1	1
Metabolism	2-Oxocarboxylic acid metabolism	ko01210	2 out of 55 3.63636363636364%	22 out of 817 2.69277845777234%	0.44341	2	0
Metabolism	Glycine, serine and threonine metabolism	ko00260	2 out of 55 3.63636363636364%	23 out of 817 2.81517747858017%	0.466857	2	0
Metabolism	Butanoate metabolism	ko00650	1 out of 55 1.81818181818182%	9 out of 817 1.1015911872705%	0.467641	1	0
Metabolism	Phosphonate and phosphinate metabolism	ko00440	1 out of 55 1.81818181818182%	10 out of 817 1.22399020807834%	0.503878	1	0
Metabolism	Phenylalanine, tyrosine and tryptophan biosynthesis	ko00400	1 out of 55 1.81818181818182%	11 out of 817 1.34638922888617%	0.53769	1	0
Metabolism	Pentose and glucuronate interconversions	ko00040	1 out of 55 1.81818181818182%	13 out of 817 1.59118727050184%	0.598669	0	1
Environmental Information Processing	cAMP signaling pathway	ko04024	1 out of 55 1.81818181818182%	14 out of 817 1.71358629130967%	0.626123	1	0
Human Diseases	Diabetic cardiomyopathy	ko05415	1 out of 55 1.81818181818182%	14 out of 817 1.71358629130967%	0.626123	1	0
Metabolism	Fructose and mannose metabolism	ko00051	1 out of 55 1.81818181818182%	15 out of 817 1.8359853121175%	0.651731	0	1
Metabolism	Carbon metabolism	ko01200	2 out of 55 3.63636363636364%	33 out of 817 4.03916768665851%	0.66679	2	0
Metabolism	Lysine degradation	ko00310	1 out of 55 1.81818181818182%	16 out of 817 1.95838433292534%	0.675615	1	0
Organismal Systems	Fat digestion and absorption	ko04975	1 out of 55 1.81818181818182%	16 out of 817 1.95838433292534%	0.675615	1	0
Metabolism	Biosynthesis of cofactors	ko01240	4 out of 55 7.27272727272727%	67 out of 817 8.20073439412485%	0.679026	4	0
Organismal Systems	Regulation of lipolysis in adipocytes	ko04923	1 out of 55 1.81818181818182%	17 out of 817 2.08078335373317%	0.697888	1	0
Organismal Systems	Thermogenesis	ko04714	4 out of 55 7.27272727272727%	69 out of 817 8.44553243574051%	0.702274	2	2
Metabolism	Nucleotide metabolism	ko01232	2 out of 55 3.63636363636364%	37 out of 817 4.52876376988984%	0.728433	2	0
Organismal Systems	Bile secretion	ko04976	1 out of 55 1.81818181818182%	19 out of 817 2.32558139534884%	0.738025	1	0
Genetic Information Processing	Aminoacyl-tRNA biosynthesis	ko00970	1 out of 55 1.81818181818182%	21 out of 817 2.5703794369645%	0.772913	1	0
Metabolism	Purine metabolism	ko00230	2 out of 55 3.63636363636364%	41 out of 817 5.01835985312117%	0.780361	2	0
Metabolism	Glycerolipid metabolism	ko00561	1 out of 55 1.81818181818182%	23 out of 817 2.81517747858017%	0.803229	1	0
Metabolism	D-Amino acid metabolism	ko00470	1 out of 55 1.81818181818182%	27 out of 817 3.30477356181151%	0.852425	1	0
Environmental Information Processing	ABC transporters	ko02010	9 out of 55 16.3636363636364%	207 out of 817 25.3365973072215%	0.9645	5	4
