# Supplementary material for: Neuroprotective effects of ethanol extraction from Rubia yunnanensis Diels on chronic cerebral hypoperfusion: modulation of the System Xc-/GSH/GPX4 axis to alleviate oxidative stress and ferroptosis
Source: Front Pharmacol. 2025 Feb 25;16:1552228. doi: 10.3389/fphar.2025.1552228 (PMC11893507; doi:10.3389/fphar.2025.1552228)
Supplement: Supplementary file 4 [file Table4.XLSX]

## Sheet: Sheet1
Ontology	ID	Description	GeneRatio	All_index	All_GeneName	Count	Up_index	Up_GeneName	Count_Up	Down_index	Down_GeneName	Count_Down
Cellular component	GO:0110165	cellular anatomical entity	46/48	ENSRNOG00000012051;ENSRNOG00000005108;ENSRNOG00000031607;ENSRNOG00000053753;ENSRNOG00000052061;ENSRNOG00000062986;ENSRNOG00000061215;ENSRNOG00000003407;ENSRNOG00000013793;ENSRNOG00000012609;ENSRNOG00000026855;ENSRNOG00000065254;ENSRNOG00000014465;ENSRNOG00000014288;ENSRNOG00000014021;ENSRNOG00000007250;ENSRNOG00000022975;ENSRNOG00000068642;ENSRNOG00000026661;ENSRNOG00000001261;ENSRNOG00000068029;…	Ncaph;Wfs1;LOC120093125;Thsd4;Ppef2;Ccbe1;Crym;Ptpn14;C1qtnf9;Trdn;Abhd12b;RT1-CE16;Oca2;Fn1;Matn4;Six4;Nfam1;Slc6a20a;Hcar1;Ftcd;Six2;Ryr1;Kcne2;Fmo3;Ngb;Ptgfr;Kcng3;Mgarp;Cd163;Ly6g6e;LOC500331;Msln;Slc9a2;Clec2d2;Osr1;Rgs12;Cpz;Tm4sf4;Itgbl1;Tfap2b;Bmp5;Chrna3;Inhca;Skap1;Tekt5;Mfge8	46	ENSRNOG00000005108;ENSRNOG00000053753;ENSRNOG00000062986;ENSRNOG00000061215;ENSRNOG00000003407;ENSRNOG00000012609;ENSRNOG00000014288;ENSRNOG00000022975;ENSRNOG00000068642;ENSRNOG00000026661;ENSRNOG00000068029;ENSRNOG00000020557;ENSRNOG00000003620;ENSRNOG00000046468;ENSRNOG00000004535;ENSRNOG00000010253;ENSRNOG00000019445;ENSRNOG00000015567;ENSRNOG00000059890;ENSRNOG00000004210;ENSRNOG00000030568;…	Wfs1;Thsd4;Ccbe1;Crym;Ptpn14;Trdn;Fn1;Nfam1;Slc6a20a;Hcar1;Six2;Ryr1;Fmo3;Ptgfr;Kcng3;Cd163;Msln;Slc9a2;Clec2d2;Osr1;Rgs12;Cpz;Itgbl1;Tfap2b;Bmp5;Inhca;Skap1;Tekt5;Mfge8	29	ENSRNOG00000012051;ENSRNOG00000031607;ENSRNOG00000052061;ENSRNOG00000013793;ENSRNOG00000026855;ENSRNOG00000065254;ENSRNOG00000014465;ENSRNOG00000014021;ENSRNOG00000007250;ENSRNOG00000001261;ENSRNOG00000029811;ENSRNOG00000011719;ENSRNOG00000011923;ENSRNOG00000027157;ENSRNOG00000030522;ENSRNOG00000016437;ENSRNOG00000013829	Ncaph;LOC120093125;Ppef2;C1qtnf9;Abhd12b;RT1-CE16;Oca2;Matn4;Six4;Ftcd;Kcne2;Ngb;Mgarp;Ly6g6e;LOC500331;Tm4sf4;Chrna3	17
Biological process	GO:0009987	cellular process	38/48	ENSRNOG00000012051;ENSRNOG00000005108;ENSRNOG00000053753;ENSRNOG00000052061;ENSRNOG00000062986;ENSRNOG00000061215;ENSRNOG00000003407;ENSRNOG00000013793;ENSRNOG00000012609;ENSRNOG00000026855;ENSRNOG00000014465;ENSRNOG00000014288;ENSRNOG00000007250;ENSRNOG00000022975;ENSRNOG00000068642;ENSRNOG00000026661;ENSRNOG00000001261;ENSRNOG00000068029;ENSRNOG00000020557;ENSRNOG00000029811;ENSRNOG00000003620;…	Ncaph;Wfs1;Thsd4;Ppef2;Ccbe1;Crym;Ptpn14;C1qtnf9;Trdn;Abhd12b;Oca2;Fn1;Six4;Nfam1;Slc6a20a;Hcar1;Ftcd;Six2;Ryr1;Kcne2;Fmo3;Ngb;Ptgfr;Kcng3;Mgarp;Ly6g6e;Msln;Slc9a2;Osr1;Rgs12;Cpz;Itgbl1;Tfap2b;Bmp5;Chrna3;Skap1;Tekt5;Mfge8	38	ENSRNOG00000005108;ENSRNOG00000053753;ENSRNOG00000062986;ENSRNOG00000061215;ENSRNOG00000003407;ENSRNOG00000012609;ENSRNOG00000014288;ENSRNOG00000022975;ENSRNOG00000068642;ENSRNOG00000026661;ENSRNOG00000068029;ENSRNOG00000020557;ENSRNOG00000003620;ENSRNOG00000046468;ENSRNOG00000004535;ENSRNOG00000019445;ENSRNOG00000015567;ENSRNOG00000004210;ENSRNOG00000030568;ENSRNOG00000008947;ENSRNOG00000004516;…	Wfs1;Thsd4;Ccbe1;Crym;Ptpn14;Trdn;Fn1;Nfam1;Slc6a20a;Hcar1;Six2;Ryr1;Fmo3;Ptgfr;Kcng3;Msln;Slc9a2;Osr1;Rgs12;Cpz;Itgbl1;Tfap2b;Bmp5;Skap1;Tekt5;Mfge8	26	ENSRNOG00000012051;ENSRNOG00000052061;ENSRNOG00000013793;ENSRNOG00000026855;ENSRNOG00000014465;ENSRNOG00000007250;ENSRNOG00000001261;ENSRNOG00000029811;ENSRNOG00000011719;ENSRNOG00000011923;ENSRNOG00000027157;ENSRNOG00000013829	Ncaph;Ppef2;C1qtnf9;Abhd12b;Oca2;Six4;Ftcd;Kcne2;Ngb;Mgarp;Ly6g6e;Chrna3	12
Biological process	GO:0065007	biological regulation	31/48	ENSRNOG00000012051;ENSRNOG00000005108;ENSRNOG00000052061;ENSRNOG00000062986;ENSRNOG00000061215;ENSRNOG00000003407;ENSRNOG00000013793;ENSRNOG00000012609;ENSRNOG00000014288;ENSRNOG00000007250;ENSRNOG00000022975;ENSRNOG00000026661;ENSRNOG00000068029;ENSRNOG00000020557;ENSRNOG00000029811;ENSRNOG00000011719;ENSRNOG00000046468;ENSRNOG00000004535;ENSRNOG00000011923;ENSRNOG00000027157;ENSRNOG00000015567;…	Ncaph;Wfs1;Ppef2;Ccbe1;Crym;Ptpn14;C1qtnf9;Trdn;Fn1;Six4;Nfam1;Hcar1;Six2;Ryr1;Kcne2;Ngb;Ptgfr;Kcng3;Mgarp;Ly6g6e;Slc9a2;Osr1;Rgs12;Cpz;Itgbl1;Tfap2b;Bmp5;Chrna3;Inhca;Skap1;Mfge8	31	ENSRNOG00000005108;ENSRNOG00000062986;ENSRNOG00000061215;ENSRNOG00000003407;ENSRNOG00000012609;ENSRNOG00000014288;ENSRNOG00000022975;ENSRNOG00000026661;ENSRNOG00000068029;ENSRNOG00000020557;ENSRNOG00000046468;ENSRNOG00000004535;ENSRNOG00000015567;ENSRNOG00000004210;ENSRNOG00000030568;ENSRNOG00000008947;ENSRNOG00000004516;ENSRNOG00000011823;ENSRNOG00000010917;ENSRNOG00000009434;ENSRNOG00000023881;…	Wfs1;Ccbe1;Crym;Ptpn14;Trdn;Fn1;Nfam1;Hcar1;Six2;Ryr1;Ptgfr;Kcng3;Slc9a2;Osr1;Rgs12;Cpz;Itgbl1;Tfap2b;Bmp5;Inhca;Skap1;Mfge8	22	ENSRNOG00000012051;ENSRNOG00000052061;ENSRNOG00000013793;ENSRNOG00000007250;ENSRNOG00000029811;ENSRNOG00000011719;ENSRNOG00000011923;ENSRNOG00000027157;ENSRNOG00000013829	Ncaph;Ppef2;C1qtnf9;Six4;Kcne2;Ngb;Mgarp;Ly6g6e;Chrna3	9
Molecular function	GO:0005488	binding	30/48	ENSRNOG00000012051;ENSRNOG00000005108;ENSRNOG00000052061;ENSRNOG00000062986;ENSRNOG00000061215;ENSRNOG00000003407;ENSRNOG00000013793;ENSRNOG00000012609;ENSRNOG00000014288;ENSRNOG00000014021;ENSRNOG00000007250;ENSRNOG00000001261;ENSRNOG00000068029;ENSRNOG00000020557;ENSRNOG00000029811;ENSRNOG00000003620;ENSRNOG00000011719;ENSRNOG00000010253;ENSRNOG00000027157;ENSRNOG00000030522;ENSRNOG00000059890;…	Ncaph;Wfs1;Ppef2;Ccbe1;Crym;Ptpn14;C1qtnf9;Trdn;Fn1;Matn4;Six4;Ftcd;Six2;Ryr1;Kcne2;Fmo3;Ngb;Cd163;Ly6g6e;LOC500331;Clec2d2;Osr1;Rgs12;Cpz;Itgbl1;Tfap2b;Bmp5;Chrna3;Skap1;Mfge8	30	ENSRNOG00000005108;ENSRNOG00000062986;ENSRNOG00000061215;ENSRNOG00000003407;ENSRNOG00000012609;ENSRNOG00000014288;ENSRNOG00000068029;ENSRNOG00000020557;ENSRNOG00000003620;ENSRNOG00000010253;ENSRNOG00000059890;ENSRNOG00000004210;ENSRNOG00000030568;ENSRNOG00000008947;ENSRNOG00000004516;ENSRNOG00000011823;ENSRNOG00000010917;ENSRNOG00000023881;ENSRNOG00000017510	Wfs1;Ccbe1;Crym;Ptpn14;Trdn;Fn1;Six2;Ryr1;Fmo3;Cd163;Clec2d2;Osr1;Rgs12;Cpz;Itgbl1;Tfap2b;Bmp5;Skap1;Mfge8	19	ENSRNOG00000012051;ENSRNOG00000052061;ENSRNOG00000013793;ENSRNOG00000014021;ENSRNOG00000007250;ENSRNOG00000001261;ENSRNOG00000029811;ENSRNOG00000011719;ENSRNOG00000027157;ENSRNOG00000030522;ENSRNOG00000013829	Ncaph;Ppef2;C1qtnf9;Matn4;Six4;Ftcd;Kcne2;Ngb;Ly6g6e;LOC500331;Chrna3	11
Biological process	GO:0050789	regulation of biological process	29/48	ENSRNOG00000012051;ENSRNOG00000005108;ENSRNOG00000052061;ENSRNOG00000062986;ENSRNOG00000061215;ENSRNOG00000003407;ENSRNOG00000013793;ENSRNOG00000012609;ENSRNOG00000014288;ENSRNOG00000007250;ENSRNOG00000022975;ENSRNOG00000026661;ENSRNOG00000068029;ENSRNOG00000020557;ENSRNOG00000029811;ENSRNOG00000011719;ENSRNOG00000046468;ENSRNOG00000004535;ENSRNOG00000011923;ENSRNOG00000027157;ENSRNOG00000004210;…	Ncaph;Wfs1;Ppef2;Ccbe1;Crym;Ptpn14;C1qtnf9;Trdn;Fn1;Six4;Nfam1;Hcar1;Six2;Ryr1;Kcne2;Ngb;Ptgfr;Kcng3;Mgarp;Ly6g6e;Osr1;Rgs12;Cpz;Itgbl1;Tfap2b;Bmp5;Chrna3;Skap1;Mfge8	29	ENSRNOG00000005108;ENSRNOG00000062986;ENSRNOG00000061215;ENSRNOG00000003407;ENSRNOG00000012609;ENSRNOG00000014288;ENSRNOG00000022975;ENSRNOG00000026661;ENSRNOG00000068029;ENSRNOG00000020557;ENSRNOG00000046468;ENSRNOG00000004535;ENSRNOG00000004210;ENSRNOG00000030568;ENSRNOG00000008947;ENSRNOG00000004516;ENSRNOG00000011823;ENSRNOG00000010917;ENSRNOG00000023881;ENSRNOG00000017510	Wfs1;Ccbe1;Crym;Ptpn14;Trdn;Fn1;Nfam1;Hcar1;Six2;Ryr1;Ptgfr;Kcng3;Osr1;Rgs12;Cpz;Itgbl1;Tfap2b;Bmp5;Skap1;Mfge8	20	ENSRNOG00000012051;ENSRNOG00000052061;ENSRNOG00000013793;ENSRNOG00000007250;ENSRNOG00000029811;ENSRNOG00000011719;ENSRNOG00000011923;ENSRNOG00000027157;ENSRNOG00000013829	Ncaph;Ppef2;C1qtnf9;Six4;Kcne2;Ngb;Mgarp;Ly6g6e;Chrna3	9
Biological process	GO:0050896	response to stimulus	29/48	ENSRNOG00000005108;ENSRNOG00000031607;ENSRNOG00000052061;ENSRNOG00000062986;ENSRNOG00000061215;ENSRNOG00000013793;ENSRNOG00000012609;ENSRNOG00000065254;ENSRNOG00000014288;ENSRNOG00000014021;ENSRNOG00000022975;ENSRNOG00000026661;ENSRNOG00000020557;ENSRNOG00000029811;ENSRNOG00000003620;ENSRNOG00000011719;ENSRNOG00000046468;ENSRNOG00000011923;ENSRNOG00000027157;ENSRNOG00000004210;ENSRNOG00000030568;…	Wfs1;LOC120093125;Ppef2;Ccbe1;Crym;C1qtnf9;Trdn;RT1-CE16;Fn1;Matn4;Nfam1;Hcar1;Ryr1;Kcne2;Fmo3;Ngb;Ptgfr;Mgarp;Ly6g6e;Osr1;Rgs12;Cpz;Itgbl1;Tfap2b;Bmp5;Chrna3;Inhca;Skap1;Mfge8	29	ENSRNOG00000005108;ENSRNOG00000062986;ENSRNOG00000061215;ENSRNOG00000012609;ENSRNOG00000014288;ENSRNOG00000022975;ENSRNOG00000026661;ENSRNOG00000020557;ENSRNOG00000003620;ENSRNOG00000046468;ENSRNOG00000004210;ENSRNOG00000030568;ENSRNOG00000008947;ENSRNOG00000004516;ENSRNOG00000011823;ENSRNOG00000010917;ENSRNOG00000009434;ENSRNOG00000023881;ENSRNOG00000017510	Wfs1;Ccbe1;Crym;Trdn;Fn1;Nfam1;Hcar1;Ryr1;Fmo3;Ptgfr;Osr1;Rgs12;Cpz;Itgbl1;Tfap2b;Bmp5;Inhca;Skap1;Mfge8	19	ENSRNOG00000031607;ENSRNOG00000052061;ENSRNOG00000013793;ENSRNOG00000065254;ENSRNOG00000014021;ENSRNOG00000029811;ENSRNOG00000011719;ENSRNOG00000011923;ENSRNOG00000027157;ENSRNOG00000013829	LOC120093125;Ppef2;C1qtnf9;RT1-CE16;Matn4;Kcne2;Ngb;Mgarp;Ly6g6e;Chrna3	10
Biological process	GO:0032501	multicellular organismal process	24/48	ENSRNOG00000012051;ENSRNOG00000005108;ENSRNOG00000052061;ENSRNOG00000062986;ENSRNOG00000061215;ENSRNOG00000003407;ENSRNOG00000013793;ENSRNOG00000012609;ENSRNOG00000014465;ENSRNOG00000014288;ENSRNOG00000007250;ENSRNOG00000022975;ENSRNOG00000068029;ENSRNOG00000020557;ENSRNOG00000029811;ENSRNOG00000011719;ENSRNOG00000046468;ENSRNOG00000011923;ENSRNOG00000010253;ENSRNOG00000004210;ENSRNOG00000011823;…	Ncaph;Wfs1;Ppef2;Ccbe1;Crym;Ptpn14;C1qtnf9;Trdn;Oca2;Fn1;Six4;Nfam1;Six2;Ryr1;Kcne2;Ngb;Ptgfr;Mgarp;Cd163;Osr1;Tfap2b;Bmp5;Chrna3;Mfge8	24	ENSRNOG00000005108;ENSRNOG00000062986;ENSRNOG00000061215;ENSRNOG00000003407;ENSRNOG00000012609;ENSRNOG00000014288;ENSRNOG00000022975;ENSRNOG00000068029;ENSRNOG00000020557;ENSRNOG00000046468;ENSRNOG00000010253;ENSRNOG00000004210;ENSRNOG00000011823;ENSRNOG00000010917;ENSRNOG00000017510	Wfs1;Ccbe1;Crym;Ptpn14;Trdn;Fn1;Nfam1;Six2;Ryr1;Ptgfr;Cd163;Osr1;Tfap2b;Bmp5;Mfge8	15	ENSRNOG00000012051;ENSRNOG00000052061;ENSRNOG00000013793;ENSRNOG00000014465;ENSRNOG00000007250;ENSRNOG00000029811;ENSRNOG00000011719;ENSRNOG00000011923;ENSRNOG00000013829	Ncaph;Ppef2;C1qtnf9;Oca2;Six4;Kcne2;Ngb;Mgarp;Chrna3	9
Biological process	GO:0008152	metabolic process	23/48	ENSRNOG00000005108;ENSRNOG00000052061;ENSRNOG00000062986;ENSRNOG00000061215;ENSRNOG00000003407;ENSRNOG00000013793;ENSRNOG00000026855;ENSRNOG00000014465;ENSRNOG00000014288;ENSRNOG00000007250;ENSRNOG00000022975;ENSRNOG00000026661;ENSRNOG00000001261;ENSRNOG00000068029;ENSRNOG00000029811;ENSRNOG00000003620;ENSRNOG00000046468;ENSRNOG00000004210;ENSRNOG00000008947;ENSRNOG00000011823;ENSRNOG00000010917;…	Wfs1;Ppef2;Ccbe1;Crym;Ptpn14;C1qtnf9;Abhd12b;Oca2;Fn1;Six4;Nfam1;Hcar1;Ftcd;Six2;Kcne2;Fmo3;Ptgfr;Osr1;Cpz;Tfap2b;Bmp5;Chrna3;Skap1	23	ENSRNOG00000005108;ENSRNOG00000062986;ENSRNOG00000061215;ENSRNOG00000003407;ENSRNOG00000014288;ENSRNOG00000022975;ENSRNOG00000026661;ENSRNOG00000068029;ENSRNOG00000003620;ENSRNOG00000046468;ENSRNOG00000004210;ENSRNOG00000008947;ENSRNOG00000011823;ENSRNOG00000010917;ENSRNOG00000023881	Wfs1;Ccbe1;Crym;Ptpn14;Fn1;Nfam1;Hcar1;Six2;Fmo3;Ptgfr;Osr1;Cpz;Tfap2b;Bmp5;Skap1	15	ENSRNOG00000052061;ENSRNOG00000013793;ENSRNOG00000026855;ENSRNOG00000014465;ENSRNOG00000007250;ENSRNOG00000001261;ENSRNOG00000029811;ENSRNOG00000013829	Ppef2;C1qtnf9;Abhd12b;Oca2;Six4;Ftcd;Kcne2;Chrna3	8
Biological process	GO:0032502	developmental process	21/48	ENSRNOG00000005108;ENSRNOG00000062986;ENSRNOG00000003407;ENSRNOG00000012609;ENSRNOG00000014465;ENSRNOG00000014288;ENSRNOG00000007250;ENSRNOG00000022975;ENSRNOG00000068029;ENSRNOG00000020557;ENSRNOG00000029811;ENSRNOG00000011719;ENSRNOG00000011923;ENSRNOG00000010253;ENSRNOG00000019445;ENSRNOG00000004210;ENSRNOG00000016437;ENSRNOG00000011823;ENSRNOG00000010917;ENSRNOG00000013829;ENSRNOG00000017510	Wfs1;Ccbe1;Ptpn14;Trdn;Oca2;Fn1;Six4;Nfam1;Six2;Ryr1;Kcne2;Ngb;Mgarp;Cd163;Msln;Osr1;Tm4sf4;Tfap2b;Bmp5;Chrna3;Mfge8	21	ENSRNOG00000005108;ENSRNOG00000062986;ENSRNOG00000003407;ENSRNOG00000012609;ENSRNOG00000014288;ENSRNOG00000022975;ENSRNOG00000068029;ENSRNOG00000020557;ENSRNOG00000010253;ENSRNOG00000019445;ENSRNOG00000004210;ENSRNOG00000011823;ENSRNOG00000010917;ENSRNOG00000017510	Wfs1;Ccbe1;Ptpn14;Trdn;Fn1;Nfam1;Six2;Ryr1;Cd163;Msln;Osr1;Tfap2b;Bmp5;Mfge8	14	ENSRNOG00000014465;ENSRNOG00000007250;ENSRNOG00000029811;ENSRNOG00000011719;ENSRNOG00000011923;ENSRNOG00000016437;ENSRNOG00000013829	Oca2;Six4;Kcne2;Ngb;Mgarp;Tm4sf4;Chrna3	7
Biological process	GO:0051179	localization	21/48	ENSRNOG00000005108;ENSRNOG00000061215;ENSRNOG00000003407;ENSRNOG00000012609;ENSRNOG00000014465;ENSRNOG00000007250;ENSRNOG00000068642;ENSRNOG00000068029;ENSRNOG00000020557;ENSRNOG00000029811;ENSRNOG00000011719;ENSRNOG00000004535;ENSRNOG00000011923;ENSRNOG00000010253;ENSRNOG00000015567;ENSRNOG00000004210;ENSRNOG00000011823;ENSRNOG00000013829;ENSRNOG00000009434;ENSRNOG00000023881;ENSRNOG00000017510	Wfs1;Crym;Ptpn14;Trdn;Oca2;Six4;Slc6a20a;Six2;Ryr1;Kcne2;Ngb;Kcng3;Mgarp;Cd163;Slc9a2;Osr1;Tfap2b;Chrna3;Inhca;Skap1;Mfge8	21	ENSRNOG00000005108;ENSRNOG00000061215;ENSRNOG00000003407;ENSRNOG00000012609;ENSRNOG00000068642;ENSRNOG00000068029;ENSRNOG00000020557;ENSRNOG00000004535;ENSRNOG00000010253;ENSRNOG00000015567;ENSRNOG00000004210;ENSRNOG00000011823;ENSRNOG00000009434;ENSRNOG00000023881;ENSRNOG00000017510	Wfs1;Crym;Ptpn14;Trdn;Slc6a20a;Six2;Ryr1;Kcng3;Cd163;Slc9a2;Osr1;Tfap2b;Inhca;Skap1;Mfge8	15	ENSRNOG00000014465;ENSRNOG00000007250;ENSRNOG00000029811;ENSRNOG00000011719;ENSRNOG00000011923;ENSRNOG00000013829	Oca2;Six4;Kcne2;Ngb;Mgarp;Chrna3	6
Biological process	GO:0048519	negative regulation of biological process	19/48	ENSRNOG00000005108;ENSRNOG00000052061;ENSRNOG00000061215;ENSRNOG00000003407;ENSRNOG00000012609;ENSRNOG00000014288;ENSRNOG00000007250;ENSRNOG00000026661;ENSRNOG00000068029;ENSRNOG00000020557;ENSRNOG00000029811;ENSRNOG00000011719;ENSRNOG00000046468;ENSRNOG00000011923;ENSRNOG00000027157;ENSRNOG00000004210;ENSRNOG00000030568;ENSRNOG00000011823;ENSRNOG00000010917	Wfs1;Ppef2;Crym;Ptpn14;Trdn;Fn1;Six4;Hcar1;Six2;Ryr1;Kcne2;Ngb;Ptgfr;Mgarp;Ly6g6e;Osr1;Rgs12;Tfap2b;Bmp5	19	ENSRNOG00000005108;ENSRNOG00000061215;ENSRNOG00000003407;ENSRNOG00000012609;ENSRNOG00000014288;ENSRNOG00000026661;ENSRNOG00000068029;ENSRNOG00000020557;ENSRNOG00000046468;ENSRNOG00000004210;ENSRNOG00000030568;ENSRNOG00000011823;ENSRNOG00000010917	Wfs1;Crym;Ptpn14;Trdn;Fn1;Hcar1;Six2;Ryr1;Ptgfr;Osr1;Rgs12;Tfap2b;Bmp5	13	ENSRNOG00000052061;ENSRNOG00000007250;ENSRNOG00000029811;ENSRNOG00000011719;ENSRNOG00000011923;ENSRNOG00000027157	Ppef2;Six4;Kcne2;Ngb;Mgarp;Ly6g6e	6
Biological process	GO:0023052	signaling	18/48	ENSRNOG00000005108;ENSRNOG00000052061;ENSRNOG00000062986;ENSRNOG00000013793;ENSRNOG00000012609;ENSRNOG00000014288;ENSRNOG00000022975;ENSRNOG00000026661;ENSRNOG00000029811;ENSRNOG00000046468;ENSRNOG00000027157;ENSRNOG00000030568;ENSRNOG00000008947;ENSRNOG00000004516;ENSRNOG00000011823;ENSRNOG00000010917;ENSRNOG00000013829;ENSRNOG00000023881	Wfs1;Ppef2;Ccbe1;C1qtnf9;Trdn;Fn1;Nfam1;Hcar1;Kcne2;Ptgfr;Ly6g6e;Rgs12;Cpz;Itgbl1;Tfap2b;Bmp5;Chrna3;Skap1	18	ENSRNOG00000005108;ENSRNOG00000062986;ENSRNOG00000012609;ENSRNOG00000014288;ENSRNOG00000022975;ENSRNOG00000026661;ENSRNOG00000046468;ENSRNOG00000030568;ENSRNOG00000008947;ENSRNOG00000004516;ENSRNOG00000011823;ENSRNOG00000010917;ENSRNOG00000023881	Wfs1;Ccbe1;Trdn;Fn1;Nfam1;Hcar1;Ptgfr;Rgs12;Cpz;Itgbl1;Tfap2b;Bmp5;Skap1	13	ENSRNOG00000052061;ENSRNOG00000013793;ENSRNOG00000029811;ENSRNOG00000027157;ENSRNOG00000013829	Ppef2;C1qtnf9;Kcne2;Ly6g6e;Chrna3	5
Biological process	GO:0048518	positive regulation of biological process	18/48	ENSRNOG00000012051;ENSRNOG00000005108;ENSRNOG00000062986;ENSRNOG00000013793;ENSRNOG00000012609;ENSRNOG00000014288;ENSRNOG00000007250;ENSRNOG00000022975;ENSRNOG00000068029;ENSRNOG00000029811;ENSRNOG00000046468;ENSRNOG00000011923;ENSRNOG00000004210;ENSRNOG00000011823;ENSRNOG00000010917;ENSRNOG00000013829;ENSRNOG00000023881;ENSRNOG00000017510	Ncaph;Wfs1;Ccbe1;C1qtnf9;Trdn;Fn1;Six4;Nfam1;Six2;Kcne2;Ptgfr;Mgarp;Osr1;Tfap2b;Bmp5;Chrna3;Skap1;Mfge8	18	ENSRNOG00000005108;ENSRNOG00000062986;ENSRNOG00000012609;ENSRNOG00000014288;ENSRNOG00000022975;ENSRNOG00000068029;ENSRNOG00000046468;ENSRNOG00000004210;ENSRNOG00000011823;ENSRNOG00000010917;ENSRNOG00000023881;ENSRNOG00000017510	Wfs1;Ccbe1;Trdn;Fn1;Nfam1;Six2;Ptgfr;Osr1;Tfap2b;Bmp5;Skap1;Mfge8	12	ENSRNOG00000012051;ENSRNOG00000013793;ENSRNOG00000007250;ENSRNOG00000029811;ENSRNOG00000011923;ENSRNOG00000013829	Ncaph;C1qtnf9;Six4;Kcne2;Mgarp;Chrna3	6
Cellular component	GO:0032991	protein-containing complex	13/48	ENSRNOG00000012051;ENSRNOG00000012609;ENSRNOG00000014288;ENSRNOG00000014021;ENSRNOG00000007250;ENSRNOG00000068029;ENSRNOG00000020557;ENSRNOG00000029811;ENSRNOG00000004535;ENSRNOG00000030568;ENSRNOG00000004516;ENSRNOG00000013829;ENSRNOG00000023881	Ncaph;Trdn;Fn1;Matn4;Six4;Six2;Ryr1;Kcne2;Kcng3;Rgs12;Itgbl1;Chrna3;Skap1	13	ENSRNOG00000012609;ENSRNOG00000014288;ENSRNOG00000068029;ENSRNOG00000020557;ENSRNOG00000004535;ENSRNOG00000030568;ENSRNOG00000004516;ENSRNOG00000023881	Trdn;Fn1;Six2;Ryr1;Kcng3;Rgs12;Itgbl1;Skap1	8	ENSRNOG00000012051;ENSRNOG00000014021;ENSRNOG00000007250;ENSRNOG00000029811;ENSRNOG00000013829	Ncaph;Matn4;Six4;Kcne2;Chrna3	5
Biological process	GO:0002376	immune system process	7/48	ENSRNOG00000031607;ENSRNOG00000065254;ENSRNOG00000014288;ENSRNOG00000007250;ENSRNOG00000022975;ENSRNOG00000009434;ENSRNOG00000023881	LOC120093125;RT1-CE16;Fn1;Six4;Nfam1;Inhca;Skap1	7	ENSRNOG00000014288;ENSRNOG00000022975;ENSRNOG00000009434;ENSRNOG00000023881	Fn1;Nfam1;Inhca;Skap1	4	ENSRNOG00000031607;ENSRNOG00000065254;ENSRNOG00000007250	LOC120093125;RT1-CE16;Six4	3
Molecular function	GO:0003824	catalytic activity	7/48	ENSRNOG00000052061;ENSRNOG00000061215;ENSRNOG00000003407;ENSRNOG00000026855;ENSRNOG00000001261;ENSRNOG00000003620;ENSRNOG00000008947	Ppef2;Crym;Ptpn14;Abhd12b;Ftcd;Fmo3;Cpz	7	ENSRNOG00000061215;ENSRNOG00000003407;ENSRNOG00000003620;ENSRNOG00000008947	Crym;Ptpn14;Fmo3;Cpz	4	ENSRNOG00000052061;ENSRNOG00000026855;ENSRNOG00000001261	Ppef2;Abhd12b;Ftcd	3
Molecular function	GO:0098772	molecular function regulator activity	7/48	ENSRNOG00000013793;ENSRNOG00000014288;ENSRNOG00000029811;ENSRNOG00000027157;ENSRNOG00000030568;ENSRNOG00000010917;ENSRNOG00000009434	C1qtnf9;Fn1;Kcne2;Ly6g6e;Rgs12;Bmp5;Inhca	7	ENSRNOG00000014288;ENSRNOG00000030568;ENSRNOG00000010917;ENSRNOG00000009434	Fn1;Rgs12;Bmp5;Inhca	4	ENSRNOG00000013793;ENSRNOG00000029811;ENSRNOG00000027157	C1qtnf9;Kcne2;Ly6g6e	3
Biological process	GO:0000003	reproduction	6/48	ENSRNOG00000012051;ENSRNOG00000014465;ENSRNOG00000007250;ENSRNOG00000004210;ENSRNOG00000010917;ENSRNOG00000017510	Ncaph;Oca2;Six4;Osr1;Bmp5;Mfge8	6	ENSRNOG00000004210;ENSRNOG00000010917;ENSRNOG00000017510	Osr1;Bmp5;Mfge8	3	ENSRNOG00000012051;ENSRNOG00000014465;ENSRNOG00000007250	Ncaph;Oca2;Six4	3
Biological process	GO:0022414	reproductive process	6/48	ENSRNOG00000012051;ENSRNOG00000014465;ENSRNOG00000007250;ENSRNOG00000004210;ENSRNOG00000010917;ENSRNOG00000017510	Ncaph;Oca2;Six4;Osr1;Bmp5;Mfge8	6	ENSRNOG00000004210;ENSRNOG00000010917;ENSRNOG00000017510	Osr1;Bmp5;Mfge8	3	ENSRNOG00000012051;ENSRNOG00000014465;ENSRNOG00000007250	Ncaph;Oca2;Six4	3
Molecular function	GO:0005215	transporter activity	6/48	ENSRNOG00000068642;ENSRNOG00000020557;ENSRNOG00000029811;ENSRNOG00000004535;ENSRNOG00000015567;ENSRNOG00000013829	Slc6a20a;Ryr1;Kcne2;Kcng3;Slc9a2;Chrna3	6	ENSRNOG00000068642;ENSRNOG00000020557;ENSRNOG00000004535;ENSRNOG00000015567	Slc6a20a;Ryr1;Kcng3;Slc9a2	4	ENSRNOG00000029811;ENSRNOG00000013829	Kcne2;Chrna3	2
Molecular function	GO:0140110	transcription regulator activity	6/48	ENSRNOG00000061215;ENSRNOG00000003407;ENSRNOG00000007250;ENSRNOG00000068029;ENSRNOG00000004210;ENSRNOG00000011823	Crym;Ptpn14;Six4;Six2;Osr1;Tfap2b	6	ENSRNOG00000061215;ENSRNOG00000003407;ENSRNOG00000068029;ENSRNOG00000004210;ENSRNOG00000011823	Crym;Ptpn14;Six2;Osr1;Tfap2b	5	ENSRNOG00000007250	Six4	1
Biological process	GO:0040007	growth	4/48	ENSRNOG00000005108;ENSRNOG00000014288;ENSRNOG00000007250;ENSRNOG00000016437	Wfs1;Fn1;Six4;Tm4sf4	4	ENSRNOG00000005108;ENSRNOG00000014288	Wfs1;Fn1	2	ENSRNOG00000007250;ENSRNOG00000016437	Six4;Tm4sf4	2
Biological process	GO:0044419	biological process involved in interspecies interaction between organisms	4/48	ENSRNOG00000012609;ENSRNOG00000014288;ENSRNOG00000046468;ENSRNOG00000009434	Trdn;Fn1;Ptgfr;Inhca	4	ENSRNOG00000012609;ENSRNOG00000014288;ENSRNOG00000046468;ENSRNOG00000009434	Trdn;Fn1;Ptgfr;Inhca	4	--	--	0
Molecular function	GO:0060089	molecular transducer activity	4/48	ENSRNOG00000022975;ENSRNOG00000026661;ENSRNOG00000046468;ENSRNOG00000013829	Nfam1;Hcar1;Ptgfr;Chrna3	4	ENSRNOG00000022975;ENSRNOG00000026661;ENSRNOG00000046468	Nfam1;Hcar1;Ptgfr	3	ENSRNOG00000013829	Chrna3	1
Biological process	GO:0040011	locomotion	2/48	ENSRNOG00000062986;ENSRNOG00000014288	Ccbe1;Fn1	2	ENSRNOG00000062986;ENSRNOG00000014288	Ccbe1;Fn1	2	--	--	0
Biological process	GO:0043473	pigmentation	1/48	ENSRNOG00000014465	Oca2	1	--	--	0	ENSRNOG00000014465	Oca2	1
Biological process	GO:0110148	biomineralization	1/48	ENSRNOG00000004210	Osr1	1	ENSRNOG00000004210	Osr1	1	--	--	0
Molecular function	GO:0005198	structural molecule activity	1/48	ENSRNOG00000014288	Fn1	1	ENSRNOG00000014288	Fn1	1	--	--	0
Molecular function	GO:0038024	cargo receptor activity	1/48	ENSRNOG00000010253	Cd163	1	ENSRNOG00000010253	Cd163	1	--	--	0
Molecular function	GO:0060090	molecular adaptor activity	1/48	ENSRNOG00000012609	Trdn	1	ENSRNOG00000012609	Trdn	1	--	--	0
Molecular function	GO:0140104	molecular carrier activity	1/48	ENSRNOG00000011719	Ngb	1	--	--	0	ENSRNOG00000011719	Ngb	1
