# Supplementary material for: Neuroprotective effects of ethanol extraction from Rubia yunnanensis Diels on chronic cerebral hypoperfusion: modulation of the System Xc-/GSH/GPX4 axis to alleviate oxidative stress and ferroptosis
Source: Front Pharmacol. 2025 Feb 25;16:1552228. doi: 10.3389/fphar.2025.1552228 (PMC11893507; doi:10.3389/fphar.2025.1552228)
Supplement: Supplementary file 5 [file Table1.XLSX]

## Sheet: ALL
No	m/z	RT min	Formula	ppm	compound name	adduct	score	PubCHEM	CAS	Pathway	SuperClass	Class	SMILES	Product Ion
M244T253_1	244.097	4.22	C16H19NO4	0.2	Ethyl 7-(diethylamino)-2-oxo-2H-chromene-3-carboxylate	[M+H-C2H6O]+	0.8944	120014	28705-46-6	Shikimates and Phenylpropanoids	Coumarins	Simple coumarins	CCOC(=O)c1cc2ccc(N(CC)CC)cc2oc1=O	[244.1, 227.07, 209.06, 181.06, 197.06]
M447T375_1	447.092	6.25	C21H18O11	0.2	Baicalin	[M+H]+	0.9998	64982	21967-41-9	Shikimates and Phenylpropanoids	Flavonoids	Flavones	O=C(O)[C@H]1O[C@@H](Oc2cc3oc(-c4ccccc4)cc(=O)c3c(O)c2O)[C@H](O)[C@@H](O)[C@@H]1O	[271.06, 447.09, 241.09, 253.05, 213.09]
M495T744_1	495.347	12.4	C30H48O4	5.7	Glucosol	[M+Na]+	0.8156	21363056	4547-24-4	Terpenoids	Triterpenoids	Ursane and Taraxastane triterpenoids	C[C@@H]1[C@H]2C3=CC[C@@H]4[C@@]5(C)C[C@@H](O)[C@H](O)C(C)(C)C5CC[C@@]4(C)[C@]3(C)CC[C@@]2(C(=O)O)CC[C@H]1C	[495.35, 417.32, 435.33, 145.1, 159.12]
M95T65	95.0162	1.09	C2H6O2S	0.5	Methyl sulfone	[M+H]+	0.9995	6213	67-71-0				CS(C)(=O)=O	[95.02, 62.99, 113.03, 95.03, 95.03]
M100T145	100.076	2.41	C6H12N2O3	1.9	5-Ureidovaleric acid	[M+H-CH3NO2]+	0.9999	458589	370585-29-8	Amino acids and Peptides	Small peptides	Aminoacids	NC(=O)NCCCCC(=O)O	[100.08, 56.05, 82.07, 101.06, 100.09]
M119T804_2	119.086	13.4	C10H11N	2.4	Benzeneacetonitrile, 2-ethyl-	[M+H-HCN]+	0.9994	15112857	74533-20-3				CCc1ccccc1CC#N	[119.09, 91.05, 117.07, 103.05, 104.06]
M119T815	119.086	13.58	C15H24O2	2.3	(4S,4aR)-4-(Hydroxymethyl)-3,4a,8,8-tetramethyl-4a,5,6,7,8,8a-hexahydronaphthalen-1(4H)-one	[M+H-C6H14O2]+	0.9988	11241847	74635-87-3	Terpenoids	Sesquiterpenoids	Drimane sesquiterpenoids	CC1=CC(=O)C2C(C)(C)CCC[C@]2(C)[C@H]1CO	[119.09, 91.05, 117.07, 119.07, 103.05]
M121T814	121.102	13.57	C9H18O3	2	9-Hydroxynonanoic acid	[M+H-3H2O]+	0.9902	138052	3788-56-5	Fatty acids	Fatty Acids and Conjugates	Hydroxy fatty acids	O=C(O)CCCCCCCCO	[121.1, 93.07, 79.05, 121.07, 105.07]
M126T62	126.055	1.04	C6H7NO2	2.9	6-(Hydroxymethyl)pyridin-3-ol	[M+H]+	0.9969	419490	40222-77-3	Alkaloids	Nicotinic acid alkaloids	Pyridine alkaloids	OCc1ccc(O)cn1	[108.04, 126.06, 127.04, 127.06, 109.05]
M126T68_2	126.092	1.13	C14H21ClN2O3S	2.7	Tosyl-L-lysyl-chloromethane	[M+H-C7H10ClNO2S]+	0.7828	73094	2104-86-1	Alkaloids	Ornithine alkaloids	Polyamines	Cc1ccc(S(=O)(=O)N[C@@H](CCCCN)C(=O)CCl)cc1	[126.07, 126.09, 98.06, 127.04, 126.06]
M141T217	141.066	3.62	C6H8N2O2	2.5	3-Imidazol-1-ylpropionic acid	[M+H]+	0.9942	2794718	18999-45-6	Alkaloids			O=C(O)CCn1ccnc1	[141.07, 69.04, 113.96, 73.03, 141.1]
M149T34	149.047	0.56	C6H7N5O	12.8	6-Methoxyguanine	[M+H-NH3]+	0.9898	65275	20535-83-5	Alkaloids	Pseudoalkaloids	Purine alkaloids	COc1nc(N)nc2nc[nH]c12	[149.02, 121.03, 121.04, 65.04, 93.03]
M152T197	152.107	3.28	C16H18N2O2	1.1	1-[(1S)-1-Benzyl-2-hydroxyethyl]-3-phenylurea	[M+H-C7H5NO]+	0.9926	10849660	223600-53-1	Alkaloids			O=C(Nc1ccccc1)N[C@H](CO)Cc1ccccc1	[152.11, 109.05, 152.07, 152.04, 124.04]
M155T58	155.082	0.97	C7H10N2O2	0.2	1-Imidazolebutyric acid	[M+H]+	0.9853	3055390	72338-58-0	Alkaloids			O=C(O)CCCn1ccnc1	[155.08, 87.04, 69.04, 62.98, 154.97]
M156T80_1	156.029	1.33	C8H5F2NO3	23	2-(3,5-Difluoroanilino)-2-ketoacetic acid	[M+H-CH2O2]+	0.9803	25220604	1060817-53-9	Shikimates and Phenylpropanoids			O=C(O)C(=O)Nc1cc(F)cc(F)c1	[156.03, 128.03, 156.06, 84.04, 82.07]
M163T821	163.148	13.69	C15H26O	1	(-)-Globulol	[M+H-C3H8O]+	0.9303	12304985	489-41-8	Terpenoids	Sesquiterpenoids	Aromadendrane sesquiterpenoids	C[C@@H]1CC[C@@H]2[C@@H]1[C@H]1[C@@H](CC[C@@]2(C)O)C1(C)C	[163.15, 107.09, 163.11, 163.04, 121.1]
M166T63	166.05	1.05	C8H7NO3	1.5	Antheraxanthin	[M+H]+	0.9946	10772	640-03-9	Alkaloids	Tryptophan alkaloids		COc1ccc2[nH]c(=O)oc2c1	[166.05, 140.03, 112.04, 166.09, 167.05]
M172T431	172.039	7.18	C10H6ClNO2	0.4	Quinoclamine	[M+H-HCl]+	0.9929	17748	2797-51-5	Polyketides	Naphthalenes	Naphthoquinones	NC1=C(Cl)C(=O)c2ccccc2C1=O	[172.04, 144.04, 154.03, 146.06, 116.05]
M172T315	172.133	5.25	C9H17NO2	0.3	Gabapentin	[M+H]+	0.7964	3446	60142-96-3	Amino acids and Peptides	Small peptides	Aminoacids	NCC1(CC(=O)O)CCCCC1	[172.13, 90.06, 83.09, 62.06, 72.04]
M173T753	173.096	12.54	C14H19NO	0.5	Deschloro-N-ethylketamine	[M+H-C2H7N]+	0.9952	132989542	6740-82-5	Alkaloids	Lysine alkaloids		CCNC1(c2ccccc2)CCCCC1=O	[173.1, 145.1, 117.07, 131.09, 131.05]
M183T209	183.102	3.48	C13H20O6S	0	3-[(2,7-Diketo-10-methyloxecan-5-yl)thio]-2-hydroxypropionic acid	[M+H-C3H6SO3]+	0.8076	23757162	1136523-08-4				CC1CCC(=O)CC(SCC(O)C(=O)O)CCC(=O)O1	[183.1, 99.04, 165.09, 125.06, 123.08]
M184T99_1	184.06	1.66	C8H9NO4	0.5	4-Pyridoxic acid	[M+H]+	0.9272	6723	82-82-6	Alkaloids	Nicotinic acid alkaloids	Pyridine alkaloids	Cc1ncc(CO)c(C(=O)O)c1O	[166.05, 148.04, 184.06, 184.12, 138.06]
M184T260	184.076	4.34	C14H15NO2	0.4	3-Ethoxycarbonyl-2-methyl-4-phenylpyrrole	[M+H-C2H6O]+	0.8212	230431	3274-63-3	Alkaloids	Nicotinic acid alkaloids	Pyridine alkaloids	CCOC(=O)c1c(-c2ccccc2)c[nH]c1C	[184.08, 184.12, 156.08, 114.07, 129.07]
M188T166	188.092	2.76	C8H17NO6	1.2	N-Acetyl-D-galactosaminitol	[M+H-2H2O]+	0.851	165880	10486-91-6	Carbohydrates	Aminosugars and aminoglycosides	Aminosugars	CC(=O)N[C@@H](CO)[C@@H](O)[C@@H](O)[C@H](O)CO	[146.08, 188.09, 142.09, 100.08, 188.07]
M193T249	193.122	4.15	C12H18O3	0.3	(.+/-.)7-epi-Jasmonic acid	[M+H-H2O]+	0.9614	7251183	62653-85-4	Fatty acids	Octadecanoids	Jasmonic acids	CC/C=C\C[C@@H]1C(=O)CC[C@@H]1CC(=O)O	[133.1, 193.12, 59.05, 175.11, 91.05]
M193T783	193.122	13.05	C21H30O2	0.3	exo-THC	[M+H-C9H14]+	0.998	167577	27179-28-8	Polyketides+Terpenoids	Meroterpenoids	Cannabinoids	C=C1CC[C@@H]2[C@@H](C1)c1c(O)cc(CCCCC)cc1OC2(C)C	[193.12, 123.04, 193.16, 81.03, 95.09]
M193T245	193.143	4.08	C9H20O4	0	Tripropylene glycol	[M+H]+	0.947	32611	24800-44-0	Fatty acids			CC(O)COC(C)COC(C)CO	[59.05, 193.05, 117.09, 193.09, 158.08]
M195T167	195.113	2.79	C10H14N2O2	0.5	(5aR,10aR)-Octahydrodipyrrolo[1,2-a:1',2'-d]pyrazine-5,10-dione	[M+H]+	0.9801	6932481	53990-71-9	Alkaloids	Lysine alkaloids		O=C1[C@H]2CCCN2C(=O)[C@H]2CCCN12	[195.11, 70.07, 98.06, 196.1, 195.08]
M195T714	195.138	11.89	C12H22O4	0.4	(1R,2S,5R)-2-Isopropyl-5-methylcyclohexyl 2,2-dihydroxyacetate	[M+H-2H2O]+	0.8077	7578094	953806-67-2	Terpenoids	Monoterpenoids	Menthane monoterpenoids+Monocyclic monoterpenoids	CC(C)[C@H]1CC[C@H](C)C[C@@H]1OC(=O)C(O)O	[149.13, 195.14, 69.03, 195.12, 93.07]
M197T243	197.06	4.04	C13H12O4	0.2	Altholactone	[M+H-2H2O]+	0.9684	343590	65408-91-5	Shikimates and Phenylpropanoids	Styrylpyrones	Kavalactones and derivatives	O=C1C=CC2OC(c3ccccc3)C(O)C2O1	[197.06, 141.07, 151.04, 197.08, 105.03]
M197T249	197.081	4.16	C10H12O4	0.1	Asarylaldehyde	[M+H]+	0.9245	20525	4460-86-0	Shikimates and Phenylpropanoids			COc1cc(OC)c(OC)cc1C=O	[197.06, 169.06, 141.07, 105.03, 147.04]
M197T326	197.117	5.43	C11H16O3	0.9	5-(4-hydroxypentyl)resorcinol	[M+H]+	0.967	129008856	606493-09-8	Polyketides			CC(O)CCCc1cc(O)cc(O)c1	[197.12, 179.11, 197.1, 133.1, 135.12]
M197T217_3	197.128	3.61	C11H18N2O4	1.1	2-Piperazinepropionic acid, 5-isobutyl-3,6-dioxo-	[M+H-CH2O2]+	0.8938	86178349	861021-94-5	Alkaloids+Amino acids and Peptides	Peptide alkaloids+Small peptides	Dipeptides+Simple diketopiperazine alkaloids	CC(C)CC1NC(=O)C(CCC(=O)O)NC1=O	[197.13, 141.07, 73.03, 69.04, 57.07]
M200T46	200.069	0.76	C12H11NO3	10.1	N-(2-Furanylmethyl)anthranilic acid	[M+H-H2O]+	0.9839	332769	501661-50-3	Alkaloids	Anthranilic acid alkaloids		O=C(O)c1ccccc1NCc1ccco1	[200.07, 182.06, 167.03, 113.0, 141.0]
M204T312	204.105	5.2	C12H13NO2	16.6	(+)-Norsecurinine	[M+H]+	0.73	11106439	25472-13-3	Alkaloids	Lysine alkaloids+Tryptophan alkaloids	Quinolizidine alkaloids+Simple indole alkaloids	O=C1C=C2C=C[C@@H]3C[C@@]2(O1)[C@H]1CCCN31	[204.11, 187.08, 100.11, 158.1, 81.07]
M210T303	210.185	5.05	C13H23NO	0.4	N,1-Dicyclohexylcarboxamide	[M+H]+	0.9856	344739	7474-36-4				O=C(NC1CCCCC1)C1CCCCC1	[210.19, 95.09, 56.05, 81.07, 67.05]
M211T267_2	211.144	4.44	C11H18N2O2	0.2	Cyclo(isoleucylprolyl)	[M+H]+	0.9776	6428988	58917-56-9	Amino acids and Peptides	Small peptides	Dipeptides	CCC(C)C1NC(=O)C2CCCN2C1=O	[211.14, 86.1, 70.07, 183.15, 211.09]
M212T482	212.165	8.03	C12H21NO2	0.5	1-(Cyclohexylmethyl)proline	[M+H]+	0.8569	16243983	180845-74-3	Alkaloids	Lysine alkaloids	Piperidine alkaloids	O=C(O)C1CCCN1CC1CCCCC1	[212.16, 149.13, 166.16, 83.09, 69.07]
M215T252	215.07	4.2	C14H10O4	0.1	Moracin M	[M+H-CO]+	0.8448	185848	56317-21-6	Shikimates and Phenylpropanoids	Isoflavonoids	2-arylbenzofurans	Oc1cc(O)cc(-c2cc3ccc(O)cc3o2)c1	[197.06, 215.07, 169.06, 141.07, 105.03]
M215T798	215.179	13.3	C19H30O2	0.1	Stanolone	[M+H-C3H8O2]+	0.9948	10635	521-18-6	Terpenoids	Steroids	Androstane steroids	C[C@]12CC[C@H]3[C@@H](CC[C@H]4CC(=O)CC[C@@]43C)[C@@H]1CC[C@@H]2O	[215.18, 159.12, 133.1, 119.09, 145.1]
M219T34_1	218.984	0.57	C5H7BrN4O	18.4	4-Bromo-1-methyl-1H-pyrazole-5-carbohydrazide	[M+H]+	0.9035	1273244	512809-81-3	Alkaloids			Cn1ncc(Br)c1C(=O)NN	[218.98, 190.99, 200.97, 84.96, 162.99]
M219T408	219.029	6.81	C11H7ClN2O	14.1	Streptochlorin	[M+H]+	0.9392	44608049	120191-51-7	Alkaloids			Clc1ncoc1-c1c[nH]c2ccccc12	[219.03, 191.03, 173.02, 219.1, 189.09]
M221T420	221.081	6.99	C15H18O8	0.5	3-[5-(3,4-dihydroxy-4-methyl-5-oxooxolan-2-yl)-2-hydroxy-4-methoxyphenyl]propanoic acid	[M+H-C3H6O4]+	0.8756	45360164	1212148-58-7	Polyketides			COc1cc(O)c(CCC(=O)O)cc1C1OC(=O)C(C)(O)C1O	[179.07, 221.08, 221.15, 90.98, 175.08]
M221T834	221.19	13.89	C17H30O2	0.6	Gentrol	[M+H-C2H6O]+	0.9659	5282198	65733-18-8	Terpenoids	Sesquiterpenoids	Farnesane sesquiterpenoids	CCOC(=O)/C=C(C)/C=C/C[C@@H](C)CCCC(C)C	[221.19, 69.07, 111.12, 203.18, 55.05]
M225T258	225.103	4.3	C9H12N4O3	17.9	Etofylline	[M+H]+	0.9972	1892	519-37-9	Alkaloids	Pseudoalkaloids	Purine alkaloids	Cn1c(=O)c2c(ncn2CCO)n(C)c1=O	[225.1, 197.07, 225.06, 225.16, 225.15]
M227T282	227.175	4.7	C12H22N2O2	0.6	N-Cyclohexyl-N'-(tetrahydro-2-furanylmethyl)urea	[M+H]+	0.8031	2886315	203450-55-9	Alkaloids			O=C(NCC1CCCO1)NC1CCCCC1	[227.18, 69.04, 209.16, 81.07, 67.05]
M229T532_1	229.086	8.87	C19H20O5	0.7	8,8-Dimethyl-2-oxo-9,10-dihydro-2H,8H-pyrano[2,3-f]chromen-9-yl 2-methylbut-2-enoate	[M+H-C5H8O2]+	0.9467	5367834	299929-45-6	Shikimates and Phenylpropanoids	Coumarins	Pyranocoumarins+Simple coumarins	C/C=C(\C)C(=O)OC1Cc2c(ccc3ccc(=O)oc23)OC1(C)C	[187.04, 229.09, 159.04, 211.08, 109.1]
M231T97	231.071	1.62	C17H10O	17.1	Benzanthrenone	[M+H]+	0.9788	6697	82-05-3	Polyketides	Polycyclic aromatic polyketides	Anthraquinones and anthrones	O=C1c2ccccc2-c2cccc3cccc1c23	[231.08, 203.08, 185.07, 175.09, 108.04]
M233T742	233.154	12.37	C25H36O5	0.1	(+)-Longipin-2-ene-7.beta.,9.alpha.-diol-1-one 7-seneciate-9-isovalerate	[M+H-C10H16O3]+	0.9953	23928005	210288-00-9	Terpenoids	Sesquiterpenoids	Longipinane sesquiterpenoids	C/C=C(/C)C(=O)O[C@@H]1C[C@@H](OC(=O)CC(C)C)C2(C)C3C(=O)C=C(C)C2C3C1(C)C	[233.15, 217.12, 149.1, 163.11, 57.07]
M237T84	237.073	1.4	C12H12O5	10.9	Austdiol	[M+H]+	0.9632	40604	53043-28-0	Polyketides	Chromanes	Azaphilones	CC1=CC2=C(C=O)C(=O)[C@](C)(O)[C@@H](O)C2=CO1	[237.07, 207.06, 163.07, 146.06, 237.12]
M237T796_2	237.221	13.27	C18H34O2	0.2	Ethyl palmitoleate	[M+H-C2H6O]+	0.954	6436624	56219-10-4	Fatty acids	Fatty esters	Wax monoesters	CCCCCC/C=C\CCCCCCCC(=O)OCC	[237.22, 219.21, 69.07, 83.09, 95.09]
M239T351	239.07	5.84	C15H10O3	0.1	Pachybasin	[M+H]+	0.9949	164982	2549-78-2	Polyketides	Polycyclic aromatic polyketides	Anthraquinones and anthrones	Cc1cc(O)c2c(c1)C(=O)c1ccccc1C2=O	[239.07, 211.08, 165.07, 193.07, 91.05]
M239T82	239.1	1.36	C8H18N2O4S	24.4	HEPES	[M+H]+	0.9904	23830	7365-45-9	Alkaloids	Lysine alkaloids		O=S(=O)(O)CCN1CCN(CCO)CC1	[239.1, 151.08, 197.09, 152.07, 239.16]
M241T379	241.049	6.32	C14H8O4	0.3	Napabucasin	[M+H]+	0.9914	10331844	83280-65-3	Polyketides	Naphthalenes	Naphthoquinones	CC(=O)c1cc2c(o1)C(=O)c1ccccc1C2=O	[241.05, 199.04, 171.04, 143.05, 105.03]
M242T335	242.175	5.59	C13H23NO3	0.2	N-Nonanoyl-L-homoserine lactone	[M+H]+	0.9089	56662027	177158-21-3	Fatty acids	Fatty amides	Fatty acyl homoserine lactones	CCCCCCCCC(=O)N[C@H]1CCOC1=O	[242.18, 182.15, 242.05, 70.07, 243.08]
M244T643	244.06	10.72	C11H9N5S	18.5	Purine, 6-[(2-pyridylmethyl)thio]-	[M+H]+	0.9902	95967	82499-10-3	Alkaloids	Pseudoalkaloids	Purine alkaloids	c1ccc(CSc2ncnc3nc[nH]c23)nc1	[244.06, 157.03, 226.09, 244.1, 208.08]
M244T650	244.105	10.83	C15H16N6O2S2	12.8	2-[(5-Amino-1,3,4-thiadiazol-2-yl)thio]-N-(3-keto-1,5-dimethyl-2-phenyl-3-pyrazolin-4-yl)acetamide	[M+H-C2H3N3S2]+	0.8366	1937572	329921-17-7	Alkaloids	Anthranilic acid alkaloids		Cc1c(NC(=O)CSc2nnc(N)s2)c(=O)n(-c2ccccc2)n1C	[244.1, 244.06, 226.09, 198.1, 211.07]
M245T822	245.226	13.71	C18H32O2	0.2	Stearolic acid	[M+H-2H2O]+	0.9896	68167	506-24-1	Fatty acids	Fatty Acids and Conjugates	Unsaturated fatty acids	CCCCCCCCC#CCCCCCCCC(=O)O	[245.23, 133.1, 147.12, 161.13, 119.09]
M247T246_1	247.087	4.1	C11H16FO3P	11.5	Diethyl 4-fluorobenzylphosphonate	[M+H]+	0.9941	11064685	63909-58-0				CCOP(=O)(Cc1ccc(F)cc1)OCC	[247.09, 219.09, 130.03, 246.08, 248.09]
M247T114_2	247.129	1.9	C10H18N2O5	0.1	gamma-l-glutamyl-l-valine	[M+H]+	0.9356	5317736		Amino acids and Peptides	Small peptides	Dipeptides	CC(C)C(NC(=O)CCC(N)C(=O)O)C(=O)O	[72.08, 118.09, 247.13, 84.04, 184.1]
M248T55	248.149	0.91	C11H21NO5	0.2	3-Hydroxybutyrylcarnitine	[M+H]+	0.9872	90659885	875668-57-8	Fatty acids	Fatty esters	Fatty acyl carnitines	CC(O)CC(=O)O[C@H](CC(=O)[O-])C[N+](C)(C)C	[248.15, 85.03, 103.04, 189.08, 132.99]
M248T593	248.237	9.89	C17H30N	1	Pyridinium, 1-dodecyl-	[Cat]+	0.9943	7718	15416-74-7	Alkaloids	Nicotinic acid alkaloids	Pyridine alkaloids	CCCCCCCCCCCC[n+]1ccccc1	[248.24, 248.15, 163.14, 230.14, 134.1]
M249T133_1	249.123	2.21	C13H16N2O3	0.6	6-Hydroxymelatonin	[M+H]+	0.9635	1864	2208-41-5	Alkaloids	Tryptophan alkaloids	Simple indole alkaloids	COc1cc2c(CCNC(C)=O)c[nH]c2cc1O	[249.12, 234.1, 249.19, 203.08, 231.08]
M249T821	249.221	13.68	C17H32O3	0.1	5,16-Heptadecadiene-1,2,4-triol	[M+H-2H2O]+	0.94	71694413	1379792-49-0	Fatty acids	Fatty acyls	Fatty alcohols	C=CCCCCCCCCC/C=C/C(O)CC(O)CO	[249.22, 81.03, 249.16, 151.11, 81.07]
M253T372	253.049	6.2	C15H10O5	0.4	1,3-Dihydroxy-2-methoxyanthraquinone	[M+H-H2O]+	0.9913	146101	10383-63-8	Polyketides	Polycyclic aromatic polyketides	Anthraquinones and anthrones	COc1c(O)cc2c(c1O)C(=O)c1ccccc1C2=O	[253.05, 225.05, 197.06, 141.07, 235.04]
M253T741	253.05	12.35	C16H12O5	0.5	Methyl 8-hydroxy-3-methyl-9-oxoxanthene-1-carboxylate	[M+H-CH4O]+	0.9967	53494764	1334722-51-8	Polyketides	Xanthones	Methyl xanthones	COC(=O)c1cc(C)cc2oc3cccc(O)c3c(=O)c12	[253.05, 225.05, 235.04, 197.06, 169.06]
M253T723_2	253.159	12.05	C18H22O2	0.3	Estra-4,9-diene-3,17-dione	[M+H-H2O]+	0.943	9835169	5173-46-6	Terpenoids	Steroids	Androstane steroids+Estrane steroids	C[C@]12CCC3=C4CCC(=O)C=C4CC[C@H]3[C@@H]1CCC2=O	[253.16, 238.14, 223.11, 211.11, 211.15]
M255T384_2	255.065	6.4	C15H12O5	0.7	Garbanzol	[M+H-H2O]+	0.9108	45360091	1628163-32-5	Shikimates and Phenylpropanoids	Flavonoids	Dihydroflavonols	O=C1c2ccc(O)cc2O[C@@H](c2ccc(O)cc2)[C@@H]1O	[255.07, 255.1, 227.07, 255.17, 211.08]
M255T441	255.065	7.35	C15H10O4	0.6	Chrysophanol	[M+H]+	0.9996	10208	481-74-3	Polyketides	Polycyclic aromatic polyketides	Anthraquinones and anthrones	Cc1cc(O)c2c(c1)C(=O)c1cccc(O)c1C2=O	[255.06, 227.07, 121.03, 199.08, 135.04]
M255T796	255.232	13.27	C16H30O2	0.4	Palmitelaidic acid	[M+H]+	0.8927	5282745	10030-73-6	Fatty acids	Fatty Acids and Conjugates	Unsaturated fatty acids	CCCCCC/C=C/CCCCCCCC(=O)O	[255.21, 219.21, 69.07, 237.22, 83.09]
M256T201	256.154	3.35	C13H21NO4	0.7	MCPA-L-carnitine	[M+H]+	0.9393							[256.15, 138.09, 83.05, 55.05, 156.1]
M257T513	257.19	8.55	C22H28O2	0.2	Etonogestrel	[M+H-C4H4O]+	0.8946	6917715	54048-10-1	Terpenoids	Steroids	Estrane steroids+Pregnane steroids	C#C[C@]1(O)CC[C@H]2[C@@H]3CCC4=CC(=O)CC[C@@H]4[C@H]3C(=C)C[C@@]21CC	[257.19, 257.23, 239.18, 145.1, 229.19]
M257T696_2	257.19	11.6	C19H26O3	0.4	S-Bioallethrin	[M+H-CH2O2]+	0.7929		28434-00-6					[257.19, 257.04, 159.12, 257.15, 145.1]
M258T54	258.108	0.9	C10H15N3O5	1	3-methylcytidine	[M+H]+	0.8976	14237477	2140-64-9	Carbohydrates	Nucleosides	Pyrimidine nucleos(t)ides	Cn1c(=N)ccn(C2OC(CO)C(O)C2O)c1=O	[126.07, 82.94, 80.95, 140.9, 200.97]
M258T240	258.113	4.01	C15H15NO3	0.1	Haplamine	[M+H]+	0.8683	648601	52617-31-9	Alkaloids	Tryptophan alkaloids+Anthranilic acid alkaloids	Quinoline alkaloids	COc1ccc2nc(O)c3c(c2c1)OC(C)(C)C=C3	[258.11, 187.04, 159.04, 72.08, 70.07]
M258T124	258.133	2.06	C11H19F2NO2	22.7	tert-Butyl 4,4-difluorocyclohexylcarbamate	[M+Na]+	0.8553	22175003	675112-67-1	Terpenoids	Monoterpenoids	Acyclic monoterpenoids	CC(C)(C)OC(=O)NC1CCC(F)(F)CC1	[258.13, 212.13, 97.03, 112.04, 143.06]
M260T270	260.092	4.5	C14H16ClN3	12.4	4-[5-(4-Chlorophenyl)-1H-pyrazol-3-yl]piperidine	[M+H-H2]+	0.9292	449126	156336-70-8	Alkaloids	Ornithine alkaloids	Polyamines	Clc1ccc(-c2cc(C3CCNCC3)[nH]n2)cc1	[260.09, 243.07, 225.05, 197.06, 215.07]
M260T586_1	260.168	9.77	C16H23NO3	12.3	1-(2-Allylphenoxy)-3-morpholinopropan-2-ol	[M+H-H2O]+	0.874	2769774	295360-20-2	Shikimates and Phenylpropanoids			C=CCc1ccccc1OCC(O)CN1CCOCC1	[260.17, 260.24, 214.16, 142.16, 90.04]
M261T295	261.123	4.91	C19H16O	15.9	Hemicyclone	[M+H]+	0.9349	141277	26307-17-5	Shikimates and Phenylpropanoids	Terphenyls	p-Terphenyls	CC1=C(c2ccccc2)C(c2ccccc2)=C(C)C1=O	[261.12, 69.04, 211.1, 165.09, 193.09]
M261T650	261.144	10.83	C11H20N2O5	5.7	Leu-Glu	[M+H]+	0.9872	113571531	16364-31-1	Amino acids and Peptides	Small peptides	Dipeptides	CC(C)C[C@@H](N)C(=O)N[C@@H](CCC(=O)O)C(=O)O	[261.15, 176.98, 261.23, 261.18, 261.98]
M261T740	261.221	12.34	C20H35NO2	0.3	.gamma.-Linolenoyl ethanolamide	[M+H-C2H7NO]+	0.978	5283445	150314-37-7	Fatty acids	Fatty amides	N-acyl ethanolamines (endocannabinoids)	CCCCC/C=C\C/C=C\C/C=C\CCCCC(=O)NCCO	[261.22, 243.21, 93.07, 107.09, 95.09]
M264T69	264.095	1.15	C10H15N3O4	1.5	5-Methyldeoxycytidine	[M+Na]+	0.9064	25076543	838-07-3	Carbohydrates	Nucleosides	Pyrimidine nucleos(t)ides	Cc1cn([C@@H]2C[C@H](O)[C@@H](CO)O2)c(=O)nc1N	[148.05, 264.1, 148.08, 148.02, 139.04]
M264T171	264.196	2.84	C16H25NO2	0.4	rac-N-Desmethylvenlafaxine	[M+H]+	0.999	3501942	149289-30-5	Alkaloids			CNCC(c1ccc(OC)cc1)C1(O)CCCCC1	[264.2, 246.19, 264.09, 264.27, 264.12]
M265T245	265.097	4.08	C16H12N2O2	0.5	3-Anilino-N-phenylmaleimide	[M+H]+	0.7131	288555	13797-26-7	Shikimates and Phenylpropanoids			O=C1C=C(Nc2ccccc2)C(=O)N1c1ccccc1	[162.05, 132.04, 247.09, 265.1, 120.04]
M265T549	265.227	9.14	C33H58N2O3	19.6	Dacuronium dication	[Cat]2+	0.8311		43021-45-0					[265.23, 69.04, 95.09, 83.09, 109.1]
M265T917	265.253	15.29	C19H36O2	0.3	Methyl oleate	[M+H-CH4O]+	0.991	5364509	112-62-9	Fatty acids	Fatty esters	Wax monoesters	CCCCCCCC/C=C\CCCCCCCC(=O)OC	[265.25, 69.07, 95.09, 247.24, 83.09]
M267T299	267.029	4.98	C12H10O5S	12.2	Resorcinol sulfoxide	[M+H]+	0.9528	5044578	62845-75-4	Shikimates and Phenylpropanoids			O=S(c1ccc(O)cc1O)c1ccc(O)cc1O	[267.03, 285.04, 183.04, 249.02, 155.05]
M267T413	267.122	6.88	C15H14N4O	4.6	1-[(2-Hydroxyethyl)amino]-3-methylpyrido[1,2-a]benzimidazole-4-carbonitrile	[M+H]+	0.7851	400521	305331-46-8	Alkaloids	Anthranilic acid alkaloids	Quinazoline alkaloids	Cc1cc(NCCO)n2c(nc3ccccc32)c1C#N	[267.12, 195.07, 177.05, 267.03, 121.07]
M267T828_1	267.174	13.8	C19H26O3	0.1	11.beta.-Hydroxyandrostenedione	[M+H-2H2O]+	0.9051	94141	382-44-5	Terpenoids	Steroids	Androstane steroids	C[C@]12C[C@H](O)[C@H]3[C@@H](CCC4=CC(=O)CC[C@@]43C)[C@@H]1CCC2=O	[267.17, 129.07, 267.21, 183.12, 181.1]
M267T798	267.211	13.3	C20H30O2	0.9	Norethandrolone	[M+H-2H2O]+	0.9877	5858	52-78-8	Terpenoids	Steroids	Estrane steroids	CC[C@]1(O)CC[C@H]2[C@@H]3CCC4=CC(=O)CC[C@@H]4[C@H]3CC[C@@]21C	[267.21, 197.13, 211.15, 183.12, 169.1]
M267T513	267.211	8.55	C20H30O2	0.3	1-Methylene-5.alpha.-androstan-3.alpha.-ol-17-one	[M+H-2H2O]+	0.8685	21122995	3398-66-1	Terpenoids	Steroids	Androstane steroids	C=C1C[C@@H](O)C[C@@H]2CC[C@H]3[C@@H]4CCC(=O)[C@@]4(C)CC[C@@H]3[C@@]12C	[267.21, 267.17, 267.03, 211.15, 183.12]
M268T406	268.06	6.77	C16H12N2O6	0.8	Hydroxydehydronifedipine lactone	[M+H-CH3NO2]+	0.8983	13599652	34785-00-7	Alkaloids	Nicotinic acid alkaloids	Pyridine alkaloids	COC(=O)c1c(C)nc2c(c1-c1ccccc1[N+](=O)[O-])C(=O)OC2	[268.06, 240.07, 250.05, 222.05, 269.04]
M269T620	269.081	10.34	C27H30O13	0.2	3-(4-Methoxyphenyl)-4-oxo-4H-chromen-7-yl 2-O-((2R,3R,4R)-3,4-dihydroxy-4-(hydroxymethyl)tetrahydrofuran-2-yl)hexopyranoside	[M+H-C11H18O9-CH3-OH]+	0.901	45783072		Shikimates and Phenylpropanoids	Isoflavonoids	Isoflavones	COc1ccc(-c2coc3cc(OC4OC(CO)C(O)C(O)C4O[C@H]4OC[C@](O)(CO)[C@H]4O)ccc3c2=O)cc1	[237.05, 269.19, 269.08, 255.06, 197.13]
M269T397_1	269.102	6.62	C12H16N2O3S	15.3	Cys-Phe	[M+H]+	0.987		72704-23-5					[269.1, 269.19, 269.13, 269.04, 209.11]
M269T412_2	269.136	6.87	C17H22N4O2	15	Resiquimod	[M+H-C2H6O]+	0.9933	159603	144875-48-9	Alkaloids	Pseudoalkaloids	Purine alkaloids	CCOCc1nc2c(N)nc3ccccc3c2n1CC(C)(C)O	[269.14, 197.11, 269.21, 269.06, 269.04]
M269T711	269.175	11.86	C15H24O4	0.4	1,9-Nonanediol diacrylate	[M+H]+	0.7159	9795378	107481-28-7	Fatty acids	Fatty esters	Wax monoesters	C=CC(=O)OCCCCCCCCCOC(=O)C=C	[269.19, 81.07, 93.07, 149.13, 67.05]
M270T431_2	270.076	7.19	C14H11N3OS	24.3	4-Amino-N-2-benzothiazolylbenzamide	[M+H]+	0.8086	37560	36855-80-8	Alkaloids	Anthranilic acid alkaloids	Anthranillic acid derivatives	Nc1ccc(C(=O)Nc2nc3ccccc3s2)cc1	[270.05, 252.07, 270.08, 271.06, 208.08]
M271T68	271.14	1.14	C16H18N2O2	15	Phthalimide, N-[4-(diethylamino)-2-butynyl]-	[M+H]+	0.8891	44385509	7351-91-9	Alkaloids			CCN(CC)CC#CCN1C(=O)c2ccccc2C1=O	[271.14, 166.1, 229.13, 70.07, 116.07]
M271T798	271.205	13.3	C20H28O3	0.1	Bacchabolivic acid	[M+H-CH2O2]+	0.9352	14262571	120837-97-0	Terpenoids	Diterpenoids	Colensane and Clerodane diterpenoids	CC1=CCC[C@H]2[C@@]1(C)CC[C@@H](C(=O)O)[C@]2(C)CCc1ccoc1	[271.21, 185.13, 271.06, 159.12, 157.1]
M271T808	271.206	13.46	C20H28O3	0.3	7-Oxopimara-8(14),15-dien-20-oic acid	[M+H-CH2O2]+	0.884	102571621		Terpenoids	Diterpenoids	Pimarane and Isopimarane diterpenoids	C=CC1(C)C=C2C(=O)CC3C(C)(C)CCCC3(C(=O)O)C2CC1	[271.21, 109.1, 271.06, 189.13, 243.21]
M273T245_2	273.131	4.08	C11H22O6	0.4	Amyl .beta.-D-Glucopyranoside	[M+Na]+	0.9102	511918	66957-71-9	Fatty acids	Fatty acyl glycosides	Fatty acyl glycosides of mono- and disaccharides	CCCCCO[C@@H]1O[C@H](CO)[C@@H](O)[C@H](O)[C@H]1O	[273.13, 273.09, 255.08, 245.1, 153.09]
M275T621	275.164	10.36	C15H24O3	8.4	Sydonol	[M+Na]+	0.9213	24011597	77782-90-2	Terpenoids	Sesquiterpenoids	Bisabolane sesquiterpenoids	CC(C)CCCC(C)(O)c1ccc(CO)cc1O	[275.16, 275.2, 229.16, 147.08, 173.1]
M275T188_2	275.212	3.14	C17H26N2O	0.1	5-Methoxy DiPT	[M+H]+	0.9735	151182	4021-34-5	Alkaloids	Tryptophan alkaloids+Pseudoalkaloids	Phenylalanine-derived alkaloids+Simple indole alkaloids	COc1ccc2[nH]cc(CCN(C(C)C)C(C)C)c2c1	[275.21, 244.17, 275.1, 148.08, 188.11]
M276T69	275.993	1.14	C9H11BrClN3	9.5	5-Bromo-2-chloro-N-cyclopentyl-4-pyrimidinamine	[M+H]+	0.8084	44248247	733039-20-8	Alkaloids			Clc1ncc(Br)c(NC2CCCC2)n1	[275.99, 131.95, 173.96, 169.97, 144.96]
M277T785	277.086	13.09	C18H12O3	0	Tanshinone A	[M+H]+	0.8898	114917	568-73-0	Terpenoids	Diterpenoids	Abietane diterpenoids+Furanoabietane diterpenoids	Cc1coc2c1C(=O)C(=O)c1c-2ccc2c(C)cccc12	[277.09, 277.22, 249.09, 193.1, 178.08]
M277T485_2	277.143	8.09	C11H20N2O6	14.3	L-Saccharopine	[M+H]+	0.8829	1087	997-68-2	Amino acids and Peptides	Small peptides	Aminoacids	NC(CCCCNC(CCC(=O)O)C(=O)O)C(=O)O	[277.14, 231.14, 259.13, 241.12, 189.09]
M278T229	278.102	3.82	C14H15NO5	0	Ethyl 4-hydroxy-5,8-dimethoxy-3-quinolinecarboxylate	[M+H]+	0.8131	224415	5428-19-3	Alkaloids	Anthranilic acid alkaloids	Quinoline alkaloids	CCOC(=O)c1c[nH]c2c(OC)ccc(OC)c2c1=O	[278.1, 236.09, 261.1, 136.04, 260.09]
M278T49_2	278.123	0.82	C10H19N3O4S	23.4	Gln-Met	[M+H]+	0.7184	54307034	114659-59-5	Amino acids and Peptides	Small peptides	Dipeptides	CSCC[C@H](NC(=O)[C@@H](N)CCC(N)=O)C(=O)O	[260.11, 242.1, 128.07, 278.12, 232.12]
M279T627	279.095	10.45	C18H15OP	1.6	Triphenylphosphine oxide	[M+H]+	0.987	13097	791-28-6	Shikimates and Phenylpropanoids			O=P(c1ccccc1)(c1ccccc1)c1ccccc1	[279.09, 219.06, 149.02, 201.05, 279.19]
M279T729_1	279.102	12.15	C18H14O3	0.2	Dihydrotanshinone	[M+H]+	0.9883	11425923	87205-99-0	Polyketides+Terpenoids	Naphthalenes+Diterpenoids	Abietane diterpenoids+Naphthoquinones	Cc1cccc2c3c(ccc12)C1=C(C(=O)C3=O)[C@@H](C)CO1	[279.1, 261.09, 233.1, 205.1, 169.06]
M284T342	284.055	5.7	C12H11ClFN3O2	15.6	Ethyl 1-(5-chloro-3-fluoropyridin-2-yl)-5-methylpyrazole-4-carboxylate	[M+H]+	0.8595	46739259	1150164-40-1	Alkaloids	Nicotinic acid alkaloids	Pyridine alkaloids	CCOC(=O)c1cnn(-c2ncc(Cl)cc2F)c1C	[284.06, 186.05, 284.09, 158.06, 214.05]
M285T310_2	285.148	5.16	C18H22O4	1.4	Enterodiol	[M+H]+	0.993	115089	80226-00-2	Shikimates and Phenylpropanoids	Lignans	Dibenzylbutane lignans	OCC(Cc1cccc(O)c1)C(CO)Cc1cccc(O)c1	[107.05, 133.07, 147.08, 159.08, 267.14]
M285T206_2	285.167	3.43	C15H24O5	8.7	(4E,6E)-3-(3-Keto-3-methoxypropyl)-2-methyloldeca-4,6-dienoic acid	[M+H]+	0.9035	51136263	1235687-86-1	Fatty acids	Fatty Acids and Conjugates	Hydroxy fatty acids	CCC/C=C/C=C/C(CCC(=O)OC)C(CO)C(=O)O	[285.17, 285.12, 195.09, 285.08, 267.16]
M287T111	287.11	1.85	C13H18O7	8.1	Sakakin	[M+H]+	0.8843	12315192	21082-33-7	Polyketides			Cc1cc(O)cc(O[C@@H]2O[C@H](CO)[C@@H](O)[C@H](O)[C@H]2O)c1	[287.11, 226.11, 269.11, 94.07, 82.07]
M287T370	287.128	6.17	C17H18O4	0.2	CAY10616	[M+H]+	0.7312	10108048	586410-08-4	Shikimates and Phenylpropanoids	Stilbenoids	Monomeric stilbenes	COc1cc(/C=C\c2ccc(OC)c(O)c2)cc(OC)c1	[287.13, 227.11, 255.1, 195.08, 287.06]
M288T243	288.086	4.06	C12H17NO5S	13.2	p-Aminophenyl .beta.-D-thiogalactoside	[M+H]+	0.7632	7408088	29558-05-2				Nc1ccc(S[C@@H]2O[C@H](CO)[C@H](O)[C@H](O)[C@H]2O)cc1	[288.09, 242.08, 197.06, 198.06, 225.05]
M289T673_2	289.18	11.22	C16H26O3	8.6	Tetranor-12(S)-HETE	[M+Na]+	0.9804	15730832	121842-79-3	Fatty acids	Fatty Acids and Conjugates	Hydroxy fatty acids+Unsaturated fatty acids	CCCCC/C=C\C[C@H](O)/C=C/C=C\CCC(=O)O	[289.18, 271.17, 159.08, 233.15, 57.03]
M290T46	290.064	0.77	C15H12FNO2S	3.7	GW 610	[M+H]+	0.9244	6712941	872726-44-8	Alkaloids			COc1ccc(-c2nc3cc(F)ccc3s2)cc1OC	[290.06, 200.04, 290.11, 122.92, 191.04]
M290T283	290.102	4.72	C21H27NO11	0.2	2-[1-[4,5-Dihydroxy-3-[(2S,3R,4S,5S,6R)-3,4,5-trihydroxy-6-(hydroxymethyl)oxan-2-yl]oxyoxan-2-yl]indol-3-yl]acetic acid	[M+H-C6H12O6]+	0.8132	57509515					O=C(O)Cc1cn(C2OCC(O)C(O)C2O[C@@H]2O[C@H](CO)[C@@H](O)[C@H](O)[C@H]2O)c2ccccc12	[272.09, 226.09, 290.1, 149.02, 142.09]
M291T427	291.065	7.11	C14H14N2OS2	11.6	N-(2,6-Dimethylphenyl)-N'-(2-thienylcarbonyl)thiourea	[M+H]+	0.9226	3257925	355419-11-3				Cc1cccc(C)c1NC(=S)NC(=O)c1cccs1	[291.07, 291.2, 291.16, 273.18, 217.07]
M291T84	291.07	1.4	C10H12N4O5	0.3	Inosine	[M+Na]+	0.9995	135398641	58-63-9	Carbohydrates	Nucleosides	Purine nucleos(t)ides	O=c1[nH]cnc2c1ncn2[C@@H]1O[C@H](CO)[C@@H](O)[C@H]1O	[159.03, 291.07, 175.98, 132.96, 217.99]
M291T304_1	291.101	5.07	C14H14N2O5	14.2	Methyl 2-methyl-4-(3-nitrophenyl)-6-oxo-1,4,5,6-tetrahydro-3-pyridinecarboxylate	[M+H]+	0.9375	2849490	130734-38-2	Amino acids and Peptides			COC(=O)C1=C(C)NC(=O)CC1c1cccc([N+](=O)[O-])c1	[291.1, 231.08, 259.08, 260.08, 248.08]
M292T217	292.158	3.61	C13H22O4S	0.1	Isopropyl (1S)-(+)-10-camphorsulfate	[M+NH4]+	0.7271	100977177	247078-58-6	Terpenoids	Monoterpenoids	Camphane monoterpenoids	CC(C)OS(=O)(=O)C[C@]12CC[C@H](CC1=O)C2(C)C	[292.16, 89.04, 85.03, 60.08, 130.09]
M292T187	292.212	3.12	C18H26FNO	15.2	4-Fluoro PV9	[M+H]+	0.8308	121262705	1829588-09-1	Alkaloids			CCCCCCC(C(=O)c1ccc(F)cc1)N1CCCC1	[292.21, 59.05, 118.09, 58.07, 117.09]
M293T225_2	293.1	3.74	C15H18O7	4.9	Picrotin	[M+H-H2O]+	0.9911	91746218	21416-53-5	Terpenoids	Sesquiterpenoids	Picrotoxane sesquiterpenoids	CC(C)(O)[C@@H]1[C@@H]2OC(=O)[C@@H]1[C@]1(O)C[C@H]3O[C@]34C(=O)O[C@H]2[C@@]41C	[293.1, 96.04, 124.04, 170.06, 293.14]
M294T749_1	294.214	12.48	C21H27N	23.8	1-tert-Butyl-4,4-diphenylpiperidine	[M+H]+	0.981	68778	57982-78-2	Alkaloids			CC(C)(C)N1CCC(c2ccccc2)(c2ccccc2)CC1	[294.21, 276.2, 192.14, 95.05, 295.23]
M295T820	295.227	13.66	C18H30O3	0.3	9-Oxo-10(E),12(E)-octadecadienoic acid	[M+H]+	0.9519	5283011	54232-58-5	Fatty acids	Fatty Acids and Conjugates+Octadecanoids	Other Octadecanoids+Oxo fatty acids+Unsaturated fatty acids	CCCCC/C=C/C=C/C(=O)CCCCCCCC(=O)O	[277.22, 151.11, 81.03, 67.05, 95.05]
M296T160	296.149	2.67	C19H21NS	8.2	Dosulepin	[M+H]+	0.7223	3155	113-53-1,136765-31-6				CN(C)CCC=C1c2ccccc2CSc2ccccc21	[296.15, 85.03, 107.05, 237.08, 60.08]
M299T785	299.068	13.09	C17H14O3S	18.3	Zaltoprofen	[M+H]+	0.7366	5720	74711-43-6				CC(C(=O)O)c1ccc2c(c1)CC(=O)c1ccccc1S2	[299.07, 299.26, 299.2, 95.09, 57.07]
M300T297	300.123	4.95	C17H17NO4	0	10-Oxomorphine	[M+H]+	0.9206	5488489	68254-48-8	Alkaloids	Tyrosine alkaloids	Morphinan alkaloids	CN1CC[C@]23c4c5ccc(O)c4O[C@H]2[C@@H](O)C=C[C@H]3[C@H]1C5=O	[300.12, 86.06, 209.06, 227.07, 181.06]
M300T303_2	300.134	5.06	C10H18O9	17.2	Glycan 1,4-D-Xylobiose	[M+NH4]+	0.8834	160873	6860-47-5	Carbohydrates	Saccharides	Disaccharides	O=C[C@H](O)[C@@H](O)[C@@H](CO)O[C@@H]1OC[C@@H](O)[C@H](O)[C@H]1O	[300.13, 264.11, 222.1, 285.08, 282.12]
M303T298	303.049	4.96	C15H10O7	0	Morin	[M+H]+	0.9928	5281670	480-16-0	Shikimates and Phenylpropanoids	Flavonoids	Flavonols	O=c1c(O)c(-c2ccc(O)cc2O)oc2cc(O)cc(O)c12	[303.05, 153.02, 207.03, 229.05, 257.04]
M303T134	303.106	2.23	C20H14O3	10.8	2'-Methoxy-7,8-benzoflavone	[M+H]+	0.9918	688681	206121-32-6	Shikimates and Phenylpropanoids	Flavonoids	Flavones	COc1ccccc1-c1cc(=O)c2c(ccc3ccccc32)o1	[303.1, 127.04, 140.03, 141.05, 257.13]
M305T688	305.081	11.47	C17H14O4	8.1	2',4'-Dimethoxyflavone	[M+Na]+	0.8379	688673	63487-16-1	Shikimates and Phenylpropanoids	Flavonoids	Flavones	COc1ccc(-c2cc(=O)c3ccccc3o2)c(OC)c1	[305.08, 249.09, 121.03, 231.08, 305.17]
M310T225	310.082	3.75	C16H11N3O4	0.6	2-Amino-4-(3-hydroxyphenyl)-7-nitro-4H-chromene-3-carbonitrile	[M+H]+	0.99	4188970	353781-68-7	Alkaloids			N#CC1=C(N)Oc2cc([N+](=O)[O-])ccc2C1c1cccc(O)c1	[310.08, 264.08, 310.16, 81.04, 310.12]
M311T692_2	311.128	11.53	C19H22O6	0.5	Gibberellin A30	[M+H-2H2O]+	0.8142	21596344	32450-00-3	Terpenoids	Diterpenoids	Gibberellins	C=C1C[C@]23C[C@H]1[C@@H](O)C[C@H]2[C@@]12C=C[C@H](O)[C@@](C)(C(=O)O1)[C@H]2[C@@H]3C(=O)O	[311.13, 267.14, 293.21, 252.11, 265.12]
M311T264	311.142	4.4	C18H18N2O3	0.1	Orantinib	[M+H]+	0.8668	5329099	252916-29-3	Alkaloids	Tryptophan alkaloids	Simple oxindole alkaloids	Cc1[nH]c(/C=C2\C(=O)Nc3ccccc32)c(C)c1CCC(=O)O	[311.13, 279.1, 251.11, 137.06, 225.1]
M313T329	313.107	5.49	C18H19F3O5	7.1	(+)-Fluprostenol lactone diol	[M+H-C2H4O2]+	0.8197	12042328	53872-60-9				O=C1C[C@H]2[C@H](C[C@@H](O)[C@@H]2/C=C/[C@@H](O)COc2cccc(C(F)(F)F)c2)O1	[121.03, 313.11, 151.04, 123.04, 137.06]
M313T394	313.126	6.57	C15H22O8	9	Bartsioside	[M+H-H2O]+	0.922	10359257	62133-72-6	Terpenoids	Monoterpenoids	Iridoids monoterpenoids	OCC1=CC[C@@H]2C=CO[C@@H](O[C@@H]3O[C@H](CO)[C@@H](O)[C@H](O)[C@H]3O)[C@H]12	[313.12, 151.08, 137.06, 189.09, 227.09]
M313T670_1	313.144	11.17	C20H22O6	0.3	Myrocin A	[M+H-CH2O2]+	0.712	11394232	723302-27-0	Terpenoids	Diterpenoids	Pimarane and Isopimarane diterpenoids	C=C[C@@]1(C)C=C2C(=O)C(O)=C3[C@](C)(C(=O)O)CC[C@@H]4C[C@]34[C@]2(O)C(=O)C1	[295.13, 313.14, 267.14, 285.05, 313.05]
M314T179	314.175	2.98	C19H23NO3	0.2	Methylcodeine	[M+H]+	0.9196	5492619	2859-16-7	Alkaloids	Tyrosine alkaloids	Isoquinoline alkaloids+Morphinan alkaloids	COc1ccc2c3c1O[C@H]1[C@@H](OC)C=C[C@H]4[C@@H](C2)N(C)CC[C@]314	[314.18, 58.07, 314.14, 107.05, 269.12]
M315T194	315.155	3.23	C3H7N7O	16.7	2-(5-Aminotetrazol-1-yl)acetohydrazide	[2M+H]+	0.8672	16765167	882305-42-2	Alkaloids			NNC(=O)Cn1nnnc1N	[158.08, 84.04, 315.13, 315.06, 130.09]
M315T200_2	315.191	3.33	C20H26O3	13	6-Oxirane boldenone	[M+H]+	0.8118	71751358	1331732-05-8	Terpenoids	Steroids	Androstane steroids	C[C@]12C=CC(=O)C=C1C1(CO1)C[C@@H]1[C@@H]2CC[C@]2(C)[C@@H](O)CC[C@@H]12	[315.19, 141.07, 69.04, 315.06, 181.1]
M315T758	315.232	12.63	C21H30O2	0.4	Progesterone	[M+H]+	0.9712	5994	57-83-0	Terpenoids	Steroids	Pregnane steroids	CC(=O)[C@H]1CC[C@H]2[C@@H]3CCC4=CC(=O)CC[C@]4(C)[C@H]3CC[C@]12C	[315.23, 97.06, 109.07, 297.22, 123.08]
M316T674	316.284	11.24	C18H37NO3	0.2	Dehydrophytosphingosine (not validated, isomer of 1677)	[M+H]+	0.896	25203815	81520-97-0	Fatty acids	Sphingolipids	Sphingoid bases	CCCCCCCCCC=CCCCC(O)C(O)C(N)CO	[316.28, 60.04, 298.27, 280.26, 316.2]
M317T465_1	317.066	7.74	C21H20O11	0.1	5-(5,7-Dihydroxy-3-methoxy-4-oxo-4H-chromen-2-yl)-2-hydroxyphenyl .beta.-D-xylopyranoside	[M+H-C5H8O4]+	0.9918	38360299	93373-16-1	Shikimates and Phenylpropanoids	Flavonoids	Flavonols	COc1c(-c2ccc(O)c(O[C@@H]3OC[C@@H](O)[C@H](O)[C@H]3O)c2)oc2cc(O)cc(O)c2c1=O	[317.07, 302.04, 274.05, 271.06, 218.06]
M317T528	317.136	8.8	C18H22O6	9.1	Aigialomycin D	[M+H-H2O]+	0.9947	45359496	412328-20-2	Polyketides	Macrolides	Zearalenones	CC1C/C=C/C(O)C(O)CC/C=C/c2cc(O)cc(O)c2C(=O)O1	[299.13, 317.14, 271.13, 317.22, 253.05]
M317T594	317.138	9.9	C20H16N2O2	21.6	2-[1-(2-Hydroxybenzyl)-1H-benzimidazol-2-yl]phenol	[M+H]+	0.9039	682797	85573-12-2	Alkaloids	Anthranilic acid alkaloids	Phenazine alkaloids	Oc1ccccc1Cn1c(-c2ccccc2O)nc2ccccc21	[317.14, 317.21, 169.12, 189.02, 299.2]
M317T354	317.189	5.9	C18H24N2O3	10.1	CP 80,633	[M+H]+	0.8744	9861730	135637-46-6	Alkaloids	Lysine alkaloids	Piperidine alkaloids	COc1ccc(C2CNC(=O)NC2)cc1O[C@H]1C[C@@H]2CC[C@H]1C2	[317.19, 196.17, 254.16, 300.16, 272.17]
M319T505_2	319.06	8.42	C20H14O7	0.2	Jusneesiinol	[M+H-CH4O2]+	0.7988	100916179	216955-78-1	Shikimates and Phenylpropanoids			O=C1OCC2=C1[C@H](c1ccc3c(c1)OCO3)c1c(ccc3c1OCO3)[C@H]2O	[319.06, 291.07, 301.05, 217.06, 273.05]
M319T132	319.15	2.19	C18H26O7	13.1	Propofol glucuronide	[M+H-2H2O]+	0.9106	71751823	114991-26-3	Terpenoids	Monoterpenoids	Menthane monoterpenoids+Monocyclic monoterpenoids	CC(C)c1cccc(C(C)C)c1O[C@@H]1O[C@H](C(=O)O)[C@@H](O)[C@H](O)[C@H]1O	[319.15, 161.09, 113.02, 113.07, 273.11]
M321T346	321.094	5.76	C16H17O5P	17.9	Ethyl 2-(diphenylphosphono)acetate	[M+H]+	0.8683	11056297	16139-79-0	Shikimates and Phenylpropanoids			CCOC(=O)CP(=O)(Oc1ccccc1)Oc1ccccc1	[199.02, 321.09, 181.01, 321.22, 321.17]
M321T430	321.112	7.17	C20H16O4	0.3	Corylin	[M+H]+	0.915	5316097	53947-92-5	Shikimates and Phenylpropanoids	Isoflavonoids	Isoflavones	CC1(C)C=Cc2cc(-c3coc4cc(O)ccc4c3=O)ccc2O1	[321.11, 289.09, 261.09, 306.09, 246.07]
M322T726	322.201	12.1	C18H27NO4	0	3-Hydroxy-N-(1-hydroxy-4-methylpentan-2-yl)-5-oxo-6-phenylhexanamide	[M+H]+	0.9504	44715241	1235361-31-5	Alkaloids	Peptide alkaloids	Simple amide alkaloids	CC(C)CC(CO)NC(=O)CC(O)CC(=O)Cc1ccccc1	[322.2, 304.19, 286.18, 258.18, 164.11]
M325T119	325.089	1.99	C14H17N5O7S2	21.6	Amurg	[M+H-CHNO3S]+	0.9985	91779	122931-48-0	Alkaloids			CCS(=O)(=O)c1cccnc1S(=O)(=O)NC(=O)Nc1nc(OC)cc(OC)n1	[325.09, 149.02, 194.1, 325.19, 162.03]
M325T235_2	325.141	3.91	C15H20N2O6	0.5	SCHEMBL22285878	[M+H]+	0.8173	605462		Alkaloids	Peptide alkaloids		Cc1cc2[nH]c(=O)c(=O)n(CC(O)C(O)C(O)CO)c2cc1C	[191.08, 325.14, 163.04, 307.13, 81.03]
M327T687	327.065	11.45	C14H19BrN2O2	15	4-Morpholinepropanamide, N-(4-bromo-3-methylphenyl)-	[M+H]+	0.8727	575187	284679-67-0	Alkaloids			Cc1cc(NC(=O)CCN2CCOCC2)ccc1Br	[327.07, 327.16, 299.16, 299.07, 281.15]
M327T334	327.098	5.57	C16H14N4O2S	20	RKI 1447	[M+H]+	0.931	60138149	1342278-01-6	Alkaloids	Nicotinic acid alkaloids	Pyridine alkaloids	O=C(NCc1cccc(O)c1)Nc1nc(-c2ccncc2)cs1	[327.09, 299.1, 295.06, 107.05, 137.06]
M328T197_1	328.103	3.28	C14H17NO8	0.7	p-Acetamidophenyl .beta.-D-glucuronide	[M+H]+	0.8148	83944	16110-10-4				CC(=O)Nc1ccc(O[C@@H]2O[C@H](C(=O)O)[C@@H](O)[C@H](O)[C@H]2O)cc1	[152.07, 110.06, 98.98, 89.06, 85.03]
M329T222	329.158	3.69	C15H22N4O3	2.2	Haloperidol	[M+Na]+	0.9916	4938	52-86-8	Alkaloids	Pseudoalkaloids	Purine alkaloids	CCCn1cnc2c1c(=O)n(CCCCC(C)=O)c(=O)n2C	[329.16, 329.11, 201.04, 329.2, 98.98]
M330T284	330.097	4.74	C17H15NO6	0	4',6'-Dimethoxy-2'-hydroxy-3-nitrochalcone	[M+H]+	0.7596	6063903	760195-09-3	Shikimates and Phenylpropanoids	Flavonoids	Chalcones	COc1cc(O)c(C(=O)/C=C/c2cccc([N+](=O)[O-])c2)c(OC)c1	[330.1, 214.09, 242.04, 238.09, 312.09]
M330T404_2	330.11	6.73	C19H17NO3	1.2	2-(4-Propoxyphenyl)-4-quinolinecarboxylic acid	[M+Na]+	0.7192	1913233	51842-69-4	Alkaloids	Tryptophan alkaloids	Quinoline alkaloids	CCCOc1ccc(-c2cc(C(=O)O)c3ccccc3n2)cc1	[330.11, 315.09, 269.08, 208.05, 254.06]
M331T503	331.081	8.39	C17H14O7	0.3	Tricin	[M+H]+	0.9696	5281702	520-32-1	Shikimates and Phenylpropanoids	Flavonoids	Flavones	COc1cc(-c2cc(=O)c3c(O)cc(O)cc3o2)cc(OC)c1O	[331.08, 315.05, 331.24, 270.05, 316.06]
M331T549_1	331.081	9.16	C22H22O8	0.2	7-Hydroxy-9,10,14-trimethoxy-2-methyl-3,4,5,6-tetrahydro-2H,8H-2,6-epoxyoxocino[3,2-b]xanthen-8-one	[M+H-C5H8O]+	0.8873	45359438	1083195-40-7	Polyketides	Xanthones	Methyl xanthones	COc1ccc2oc3c(OC)c4c(c(O)c3c(=O)c2c1OC)C1CCCC(C)(O4)O1	[331.08, 301.03, 316.06, 298.05, 331.19]
M331T370_3	331.154	6.17	C19H22O5	0.1	TETRAHYDROSAPPANONE A TRIMETHYL ETHER	[M+H]+	0.8606	6708784		Shikimates and Phenylpropanoids			COc1ccc2c(c1)OCC(Cc1ccc(OC)c(OC)c1)C2O	[151.08, 287.13, 137.06, 331.15, 189.09]
M331T399	331.205	6.66	C13H26N6O4	0.8	Val-Gly-Arg	[M+H]+	0.996	18232349		Amino acids and Peptides	Small peptides	Dipeptides+Tripeptides	CC(C)C(N)C(=O)NCC(=O)NC(CCCN=C(N)N)C(=O)O	[331.21, 98.98, 313.03, 331.31, 176.99]
M332T199	332.114	3.31	C12H21N5O2S2	22	Nizatidine	[M+H]+	0.7959	3033637	76963-41-2	Alkaloids+Amino acids and Peptides			CN/C(=C\[N+](=O)[O-])NCCSCc1csc(CN(C)C)n1	[332.11, 148.0, 207.1, 314.1, 262.06]
M332T649_2	332.193	10.81	C23H25NO	20.7	Mahanimbine	[M+H]+	0.7609	167963	21104-28-9	Alkaloids	Tryptophan alkaloids	Carbazole alkaloids	CC(C)=CCCC1(C)C=Cc2c(c(C)cc3c2[nH]c2ccccc23)O1	[332.19, 332.06, 288.07, 260.08, 204.11]
M333T442	333.131	7.37	C22H21FO4	6.5	AMPK activator	[M+H-2H2O]+	0.9967	16760291	849727-81-7				O=C(O)c1ccc(CCCc2ccc(OCCc3ccc(F)cc3)cc2)o1	[333.13, 333.24, 290.11, 315.12, 334.13]
M334T157_1	334.113	2.61	C20H15NO4	17	2-[(4-Phenoxybenzoyl)amino]benzoic acid	[M+H]+	0.8812	891473	186891-10-1	Alkaloids	Anthranilic acid alkaloids	Anthranillic acid derivatives	O=C(Nc1ccccc1C(=O)O)c1ccc(Oc2ccccc2)cc1	[141.05, 109.03, 127.04, 206.06, 85.03]
M336T210	336.202	3.49	C21H25N3O	15.9	Mmv024397	[M+H]+	0.7701	44527525	1223035-86-6	Alkaloids			OC(=NC1CC1)c1ccc(N2CCC(Cc3ccccc3)CC2)nc1	[336.2, 59.05, 102.06, 162.08, 117.09]
M337T160_1	337.053	2.67	C13H14O9	0	Salicyl glucuronide	[M+Na]+	0.9276	71772310	7695-70-7	Shikimates and Phenylpropanoids	Phenolic acids (C6-C1)	Simple phenolic acids	O=C(O)c1ccccc1O[C@H]1O[C@H](C(=O)O)[C@@H](O)[C@H](O)[C@H]1O	[199.02, 337.05, 161.02, 337.09, 181.01]
M338T236	338.122	3.94	C12H23N3O4S2	2.7	Met-Gly-Met	[M+H]+	0.9958	18222821	14486-10-3	Amino acids and Peptides	Small peptides	Dipeptides+Tripeptides	CSCCC(N)C(=O)NCC(=O)NC(CCSC)C(=O)O	[338.12, 292.08, 248.09, 320.11, 339.12]
M339T138	339.105	2.3	C14H20O8	0.6	Vanilloloside	[M+Na]+	0.9573	44577222	74950-96-2	Shikimates and Phenylpropanoids			COc1cc(CO)ccc1O[C@@H]1O[C@H](CO)[C@@H](O)[C@H](O)[C@H]1O	[339.11, 339.16, 177.1, 321.15, 321.11]
M339T695	339.268	11.59	C24H38O3	0.6	5-Cholenic acid-3.beta.-ol	[M+H-2H2O]+	0.9453	92997	5255-17-4	Terpenoids	Steroids	Cholane steroids+Cholestane steroids	C[C@H](CCC(=O)O)[C@H]1CC[C@H]2[C@@H]3CC=C4C[C@@H](O)CC[C@]4(C)[C@H]3CC[C@@]21C	[339.27, 321.26, 339.23, 81.07, 95.09]
M340T272_1	340.118	4.53	C19H17NO5	0.1	Mofezolac	[M+H]+	0.9214	4237	78967-07-4				COc1ccc(-c2noc(CC(=O)O)c2-c2ccc(OC)cc2)cc1	[340.12, 280.1, 294.11, 340.21, 224.07]
M343T621_1	343.154	10.35	C20H26O7	0.4	Teucroxide	[M+H-2H2O]+	0.8355	56776181	87587-49-3	Terpenoids	Diterpenoids	Colensane and Clerodane diterpenoids	C[C@@H]1C[C@@H](O)[C@@]23CO[C@]2(CO)C[C@@H](O)CC3[C@@]12CC(c1ccoc1)OC2=O	[325.14, 297.15, 279.14, 343.15, 343.06]
M345T243	345.094	4.05	C18H16O7	5.3	Eupatilin	[M+H]+	0.9983	5273755	22368-21-4	Shikimates and Phenylpropanoids	Flavonoids	Flavones	COc1ccc(-c2cc(=O)c3c(O)c(OC)c(O)cc3o2)cc1OC	[345.09, 345.14, 137.06, 346.1, 299.1]
M347T678	347.183	11.3	C21H22N4O	9.3	PF-622	[M+H]+	0.8302	11515763	898235-65-9	Alkaloids			O=C(Nc1ccccc1)N1CCN(Cc2ccc3ccccc3n2)CC1	[347.18, 347.08, 347.26, 329.07, 219.03]
M349T398	349.237	6.63	C21H32O4	0.3	5.beta.-Dihydrocorticosterone	[M+H]+	0.9693	21145110	566-01-8	Terpenoids	Steroids	Pregnane steroids	C[C@]12C[C@H](O)[C@H]3[C@@H](CC[C@@H]4CC(=O)CC[C@]34C)[C@@H]1CC[C@@H]2C(=O)CO	[349.24, 95.09, 304.03, 313.22, 107.09]
M349T850	349.274	14.17	C22H36O3	0.5	Acetic acid [5-(7-keto-5,5,8a-trimethyl-2-methylenedecalin-1-yl)-3-methylpentyl] ester	[M+H]+	0.729	75368758	1794639-08-9	Terpenoids	Diterpenoids	Labdane diterpenoids	C=C1CCC2C(C)(C)CC(=O)CC2(C)C1CCC(C)CCOC(C)=O	[349.28, 179.14, 277.22, 71.09, 93.07]
M350T510	350.066	8.5	C17H13ClFNO4	20.2	Clodinafop-propargyl	[M+H]+	0.725	6916151	105512-06-9	Alkaloids			C#CCOC(=O)C(C)Oc1ccc(Oc2ncc(Cl)cc2F)cc1	[350.07, 322.07, 307.05, 279.05, 350.29]
M351T228	351.105	3.8	C12H26O5Si2	6.1	1,3-Bis(3-carboxypropyl)tetramethyldisiloxane	[M+2Na-H]+	0.9276	76880	3353-68-2				C[Si](C)(CCCC(=O)O)O[Si](C)(C)CCCC(=O)O	[351.1, 203.05, 171.04, 351.15, 189.05]
M351T757	351.178	12.62	C21H22N2O3	19.4	Strychnine_n_oxide	[M+H]+	0.9972	73393	7248-28-4	Alkaloids	Tryptophan alkaloids	Aspidosperma-Iboga hybrid type (Vinca alkaloids)+Strychnos type	O=C1C[C@@H]2OCC=C3C[N+]4([O-])CC[C@]56c7ccccc7N1[C@H]5[C@H]2[C@H]3C[C@@H]64	[351.18, 351.29, 351.06, 352.18, 351.09]
M351T777	351.253	12.95	C19H36O4	6.3	Avocadene 4-acetate	[M+Na]+	0.9344	45360076	59499-18-2	Fatty acids	Fatty acyls	Fatty alcohols	C=CCCCCCCCCCCCC(CC(O)CO)OC(C)=O	[351.25, 277.22, 121.1, 81.07, 93.07]
M352T321	352.154	5.36	C21H22NO4+.Cl-	0.1	Palmatine	[M]+	0.998	73442	10605-02-4	Alkaloids	Tyrosine alkaloids	Isoquinoline alkaloids+Protoberberine alkaloids	COc1cc2c(cc1OC)-c1cc3ccc(OC)c(OC)c3c[n+]1CC2.[Cl-]	[352.15, 336.12, 337.13, 308.13, 322.11]
M353T297	353.138	4.95	C21H22O6	0	3-Piperonyl-4-veratryltetrahydrofuran-2-one	[M+H-H2O]+	0.7685	495973	162680-80-0	Shikimates and Phenylpropanoids	Lignans	Dibenzylbutyrolactone lignans	COc1ccc(CC2COC(=O)C2Cc2ccc3c(c2)OCO3)cc1OC	[353.14, 321.11, 167.07, 191.07, 289.09]
M355T284	355.173	4.73	C16H28O7	0.2	MCULE-9958171223	[M+Na]+	0.9931	56776223		Terpenoids	Monoterpenoids	Monocyclic monoterpenoids	CC(C)C1=CCC(C)(O)C(OC2OC(CO)C(O)C(O)C2O)C1	[355.17, 201.05, 355.12, 137.06, 323.09]
M355T911	355.282	15.19	C21H38O4	7.3	1-Monolinolein	[M+H]+	0.9972	40489139	2258-92-6	Fatty acids	Glycerolipids	Monoacylglycerols	CCCCC/C=C\C/C=C\CCCCCCCC(=O)OC[C@H](O)CO	[355.28, 355.17, 355.4, 355.37, 355.19]
M358T367	358.107	6.12	C12H21N3O6S	8.6	Glutathione ethyl ester	[M+Na]+	0.9414	358180	92614-59-0	Amino acids and Peptides	Small peptides	Dipeptides+Tripeptides	CCOC(=O)CNC(=O)C(CS)NC(=O)CCC(N)C(=O)O	[358.11, 330.11, 274.09, 137.06, 302.08]
M360T222	360.129	3.7	C17H18ClN5O2	18.5	PF 4800567	[M+H]+	0.8076	53472153	1188296-52-7	Alkaloids			Nc1ncnc2c1c(COc1cccc(Cl)c1)nn2C1CCOCC1	[149.06, 121.07, 141.02, 167.07, 85.03]
M361T720	361.071	12.01	C19H14O6	4.9	Rabelomycin	[M+Na]+	0.9594	168797	28399-50-0	Polyketides	Polycyclic aromatic polyketides	Angucyclines	CC1(O)CC(=O)c2c(cc(O)c3c2C(=O)c2cccc(O)c2C3=O)C1	[361.07, 361.24, 290.06, 262.06, 361.29]
M361T507	361.201	8.45	C21H30O6	0.8	2-(9-Hydroxy-4-keto-2,6,9a-trimethyl-6-vinyl-3,5,5a,7,8,9-hexahydro-2H-pyrano[2,3-b]chromen-7-yl)-2-methyl-propionic acid	[M+H-H2O]+	0.8644	129008914	2108840-31-7	Terpenoids	Diterpenoids		C=CC1(C)C(C(C)(C)C(=O)O)CC(O)C2(C)OC3=C(CC12)C(=O)CC(C)O3	[361.2, 315.2, 297.18, 279.17, 261.16]
M362T216	362.217	3.59	C23H27N3O	15.5	10a-[(E)-2-[4-(Dimethylamino)phenyl]vinyl]-10,10-dimethyl-3,4-dihydro-1H-pyrimid[1,2-a]indol-2-one	[M+H]+	0.7641	5939872	60946-69-2	Alkaloids			CN(C)c1ccc(/C=C/C23NC(=O)CCN2c2ccccc2C3(C)C)cc1	[362.22, 128.07, 59.05, 188.09, 100.08]
M363T317	363.145	5.28	C17H19FN4O4	3.5	Marbofloxacin	[M+H]+	0.7619	60651	115550-35-1	Alkaloids			CN1CCN(c2c(F)cc3c(=O)c(C(=O)O)cn4c3c2OCN4C)CC1	[363.15, 248.12, 346.12, 247.11, 300.11]
M363T809	363.195	13.48	C30H42O11	0.9	Hellebrigenin-3-O-.beta.-glucoside	[M+H-C6H16O8]+	0.8006	3055779	72947-90-1	Terpenoids	Steroids	Bufadienolides	C[C@]12CC[C@H]3[C@@H](CC[C@]4(O)C[C@@H](O[C@@H]5O[C@H](CO)[C@@H](O)[C@H](O)[C@H]5O)CC[C@]34C=O)[C@@]1(O)CC[C@@H]2c1ccc(=O)oc1	[363.2, 363.26, 335.2, 345.18, 293.15]
M365T234_1	365.085	3.91	C15H18O9	0.2	Methyl salicylate .beta.-D-O-glucuronide methyl ester	[M+Na]+	0.9928	71750605	226932-59-8	Shikimates and Phenylpropanoids	Phenolic acids (C6-C1)	Simple phenolic acids	COC(=O)c1ccccc1O[C@@H]1O[C@H](C(=O)OC)[C@@H](O)[C@H](O)[C@H]1O	[365.08, 203.05, 347.09, 203.03, 188.04]
M368T239	368.173	3.98	C18H25NO7	8.1	jacobine N-oxide	[M+H]+	0.7748	132282048		Alkaloids	Ornithine alkaloids	Pyrrolizidine alkaloids	C[C@@H]1O[C@@]12C[C@@H](C)[C@@](C)(O)C(=O)OCC1=CC[N+]3([O-])CC[C@@H](OC2=O)[C@@H]13	[368.17, 59.05, 113.06, 105.0, 117.09]
M369T154	369.115	2.57	C15H22O9	0.6	4-Hydroxy-3,5-dimethoxybenzyl hexopyranoside	[M+Na]+	0.9988	51136354		Shikimates and Phenylpropanoids			COc1cc(COC2OC(CO)C(O)C(O)C2O)cc(OC)c1O	[369.12, 207.06, 206.05, 185.04, 369.21]
M369T222	369.152	3.7	C16H24N4O4S	19.7	N-[2-(4-Mesylpiperazino)ethyl]-N'-(p-tolyl)oxamide	[M+H]+	0.999	2273687	351494-37-6	Alkaloids	Ornithine alkaloids	Polyamines	Cc1ccc(NC(=O)C(=O)NCCN2CCN(S(C)(=O)=O)CC2)cc1	[369.15, 207.06, 137.06, 370.15, 175.04]
M371T678	371.258	11.3	C22H36O3	4.9	Larixyl acetate	[M+Na]+	0.815	11957828	4608-49-5	Terpenoids	Diterpenoids	Labdane diterpenoids	C=C[C@@](C)(O)CC[C@H]1C(=C)C[C@H](OC(C)=O)[C@H]2C(C)(C)CCC[C@]12C	[371.26, 353.25, 335.24, 159.12, 95.09]
M372T178	372.238	2.97	C25H31N3O	15.3	Methylrosaniline	[M+H-H2O]+	0.8743	68050	467-63-0				CN(C)c1ccc(C(O)(c2ccc(N(C)C)cc2)c2ccc(N(C)C)cc2)cc1	[372.24, 133.1, 85.03, 105.07, 147.12]
M375T641	375.108	10.68	C19H18O8	0.1	Neobaicalein	[M+H]+	0.9654	124211	55084-08-7	Shikimates and Phenylpropanoids	Flavonoids	Flavones	COc1cccc(O)c1-c1cc(=O)c2c(O)c(OC)c(OC)c(OC)c2o1	[375.11, 345.06, 315.07, 327.05, 375.21]
M375T769	375.289	12.82	C24H40O4	0.1	Hyodeoxycholic acid	[M+H-H2O]+	0.966	5283820	83-49-8	Terpenoids	Steroids	Cholane steroids	C[C@H](CCC(=O)O)[C@H]1CC[C@H]2[C@@H]3C[C@H](O)[C@@H]4C[C@H](O)CC[C@]4(C)[C@H]3CC[C@@]21C	[375.29, 357.28, 339.27, 95.09, 243.17]
M376T695_1	376.26	11.59	C16H33N5O5	9.1	Thr-Lys-Lys	[M+H]+	0.8773	18224395		Amino acids and Peptides	Small peptides	Tripeptides	CC(O)C(N)C(=O)NC(CCCCN)C(=O)NC(CCCCN)C(=O)O	[376.26, 57.07, 302.19, 209.13, 292.2]
M379T225_1	379.1	3.75	C16H20O9	0.3	2-Glucosyloxy-4-methoxycinnamic acid	[M+Na]+	0.9011	23872107	31564-49-5	Shikimates and Phenylpropanoids	Phenylpropanoids (C6-C3)	Cinnamic acids and derivatives	COc1ccc(/C=C/C(=O)O)c(O[C@@H]2O[C@H](CO)[C@@H](O)[C@H](O)[C@H]2O)c1	[379.1, 379.15, 199.04, 217.05, 185.04]
M380T242	380.098	4.03	C15H19NO9	6.5	HMBOA-Glc	[M+Na]+	0.9313	11035692	17622-26-3	Alkaloids			COc1ccc2c(c1)O[C@H](O[C@@H]1O[C@H](CO)[C@@H](O)[C@H](O)[C@H]1O)C(=O)N2	[218.04, 380.09, 344.08, 172.04, 200.03]
M384T225	384.199	3.74	C21H27N3O5	18.9	MAB-CHMINACA metabolite M7	[M+H-H2O]+	0.8464	129887390		Amino acids and Peptides	Small peptides	Dipeptides	CC(C)(C(=O)O)C(NC(=O)c1nn(CC2CCCCC2)c2ccccc12)C(=O)O	[384.2, 269.14, 215.13, 197.11, 210.07]
M385T605	385.07	10.08	C21H12F2N2O2	13	2,3-Di(4-fluorophenyl)quinoxaline-6-carboxylic acid	[M+Na]+	0.9396	1340404	355397-64-7	Alkaloids	Anthranilic acid alkaloids	Phenazine alkaloids	O=C(O)c1ccc2nc(-c3ccc(F)cc3)c(-c3ccc(F)cc3)nc2c1	[385.07, 283.08, 311.07, 339.07, 315.07]
M385T776	385.274	12.94	C45H78NO7P	0.2	C18(Plasm)-22:6 PE	[M+H-C20H42NO4P]+	0.9959	42607458	206059-98-5	Fatty acids	Glycerophospholipids	Glycerophosphoethanolamines	CC/C=C\C/C=C\C/C=C\C/C=C\C/C=C\C/C=C\CCC(=O)O[C@H](CO/C=C\CCCCCCCCCCCCCCCC)COP(=O)(O)OCCN	[385.27, 107.09, 213.13, 135.08, 135.12]
M387T693_2	387.289	11.54	C25H42O5	0.1	Cholic acid methyl ester	[M+H-2H2O]+	0.8151	10960835	1448-36-8	Terpenoids	Steroids	Cholane steroids	COC(=O)CC[C@@H](C)[C@H]1CC[C@H]2[C@H]3[C@H](C[C@H](O)[C@@]21C)[C@@]1(C)CC[C@@H](O)C[C@H]1C[C@H]3O	[369.28, 387.29, 147.12, 95.09, 119.09]
M389T314_1	389.084	5.24	C15H21Cl2FN2O3	7.9	Fluroxypyr-meptyl	[M+Na]+	0.7177	54745	81406-37-3	Alkaloids			CCCCCCC(C)OC(=O)COc1nc(F)c(Cl)c(N)c1Cl	[389.08, 389.16, 181.05, 209.08, 177.05]
M393T167	393.129	2.78	C21H22O6	5.2	MEGxp0_001223	[M+Na]+	0.9235	13916162		Shikimates and Phenylpropanoids	Lignans	Dibenzylbutyrolactone lignans	COc1ccc(CC2C(=O)OCC2Cc2ccc3c(c2)OCO3)cc1OC	[393.13, 230.07, 214.09, 231.12, 229.06]
M393T567	393.315	9.44	C28H44O3	0.3	1,25-Dihydroxy Vitamin D2	[M+H-2H2O]+	0.852	9547243	60133-18-8	Terpenoids	Steroids	Vitamin D2 and derivatives	C=C1/C(=C\C=C2/CCC[C@@]3(C)[C@H]2CC[C@@H]3[C@H](C)/C=C/[C@H](C)C(C)(C)O)C[C@@H](O)C[C@@H]1O	[393.32, 393.23, 197.13, 393.07, 225.16]
M393T812	393.347	13.54	C29H46O	11.5	(3.beta.,5.alpha.)-4,4-Dimethylcholesta-8,14,24-trien-3-ol	[M+H-H2O]+	0.9044	443212	64284-64-6	Terpenoids	Triterpenoids	Lanostane, Tirucallane and Euphane triterpenoids	CC(C)=CCC[C@@H](C)[C@H]1CC=C2C3=C(CC[C@@]21C)[C@@]1(C)CC[C@H](O)C(C)(C)[C@@H]1CC3	[393.35, 141.07, 69.04, 394.35, 393.21]
M397T862	397.271	14.36	C19H41O6P	15.6	1-Hexadecyl lysophosphatidic acid	[M+H]+	0.7652	11825433	52603-03-9	Fatty acids	Glycerophospholipids	Glycerophosphates	CCCCCCCCCCCCCCCCOC[C@@H](O)COP(=O)(O)O	[397.3, 277.22, 121.1, 81.07, 95.09]
M397T864	397.31	14.39	C27H42O3	0.9	3-Oxo-4-cholestenoic acid	[M+H-H2O]+	0.9373	42628074	309762-85-4	Terpenoids	Steroids	Cholestane steroids	C[C@H](CCC[C@@H](C)[C@H]1CC[C@H]2[C@@H]3CCC4=CC(=O)CC[C@]4(C)[C@H]3CC[C@@]21C)C(=O)O	[397.31, 109.07, 379.3, 95.09, 123.08]
M405T610	405.263	10.16	C24H36O5	1.5	Q63392881	[M+H]+	0.8882	137333800		Terpenoids	Steroids	Cholane steroids	C[C@H](CCC(=O)O)[C@H]1CC[C@H]2[C@@H]3C(=O)C(=O)[C@@H]4C[C@H](O)CC[C@]4(C)[C@H]3CC[C@@]21C	[405.26, 369.24, 97.06, 351.23, 209.13]
M407T721	407.278	12.02	C24H42O7	3.7	4-Keto-4-[3-methyl-5-(5,6,7-trihydroxy-1,2,4a,5-tetramethyldecalin-1-yl)pentoxy]butyric acid	[M+H-2H2O]+	0.9325	60208904	1396553-50-6	Terpenoids	Diterpenoids	Colensane and Clerodane diterpenoids	CC(CCOC(=O)CCC(=O)O)CCC1(C)C(C)CCC2(C)C1CC(O)C(O)C2(C)O	[407.28, 95.09, 107.09, 119.09, 81.07]
M407T654	407.279	10.89	C24H40O6	0.6	3a,6b,7b,12a-Tetrahydroxy-5b-cholanoic acid	[M-H2O+H]+	0.8773	5283900	75110-48-4	Terpenoids	Steroids	Cholane steroids	C[C@H](CCC(=O)O)[C@H]1CC[C@H]2[C@H]3[C@H](C[C@H](O)[C@@]21C)[C@@]1(C)CC[C@@H](O)C[C@H]1[C@H](O)[C@@H]3O	[353.25, 371.26, 389.27, 335.24, 95.09]
M411T237	411.199	3.94	C20H28N4O4	3.7	Galardin	[M+Na]+	0.9849	132519	142880-36-2	Amino acids and Peptides	Small peptides	Dipeptides+Tripeptides	CNC(=O)[C@H](Cc1c[nH]c2ccccc12)NC(=O)[C@@H](CC(=O)NO)CC(C)C	[411.2, 348.05, 280.06, 394.06, 252.07]
M411T775	411.289	12.91	C45H70O16	0	(1.beta.,3.beta.,8.xi.,9.xi.,14.xi.)-3-((6-Deoxy-.alpha.-L-mannopyranosyl)oxy)spirosta-5,25(27)-dien-1-yl 6-deoxy-2-O-(6-deoxy-.alpha.-L-mannopyranosyl)-.beta.-D-galactopyranoside	[M+H-C18H32O13]+	0.9107	45360251		Terpenoids	Steroids	Spirostane steroids	C=C1CC[C@@]2(OC1)O[C@H]1CC3C4CC=C5C[C@@H](O[C@@H]6O[C@@H](C)[C@H](O)[C@@H](O)[C@H]6O)C[C@@H](O[C@@H]6O[C@H](C)[C@H](O)[C@H](O)[C@H]6O[C@@H]6O[C@@H](C)[C@H](O)[C@@H](O)[C@H]6O)[C@]5(C)C4CC[C@]3(C)[C@H]1[C@@H]2C	[411.29, 393.28, 107.09, 119.09, 133.1]
M411T825	411.289	13.74	C27H38O3	0.4	Boldenone cypionate	[M+H]+	0.7636	71314193	106505-90-2	Terpenoids	Steroids	Androstane steroids	C[C@]12C=CC(=O)C=C1CC[C@@H]1[C@@H]2CC[C@]2(C)[C@@H](OC(=O)CCC3CCCC3)CC[C@@H]12	[411.29, 383.06, 411.4, 383.29, 95.09]
M415T850	415.303	14.17	C23H40N2O3	23.4	Leukotriene B4 3-aminopropylamide	[M+Na]+	0.9995	14280302	89596-43-0	Fatty acids	Eicosanoids	Leukotrienes	CCCCC/C=C\C[C@@H](O)/C=C/C=C/C=C\[C@@H](O)CCCC(=O)NCCCN	[415.3, 416.31, 415.16, 415.45, 415.19]
M415T843	415.321	14.06	C27H42O3	0.2	(25S)-7-Dafachronic acid	[M+H]+	0.8098	23583984	949004-12-0	Terpenoids	Steroids	Cholestane steroids	C[C@@H](CCC[C@@H](C)[C@H]1CC[C@H]2C3=CC[C@H]4CC(=O)CC[C@]4(C)[C@H]3CC[C@@]21C)C(=O)O	[415.32, 121.1, 107.09, 95.09, 109.1]
M417T323	417.114	5.38	C21H20O9	0.6	Puerarin	[M+H]+	0.9683	5281807	3681-99-0	Shikimates and Phenylpropanoids	Isoflavonoids	Isoflavones	O=c1c(-c2ccc(O)cc2)coc2c([C@@H]3O[C@H](CO)[C@@H](O)[C@H](O)[C@H]3O)c(O)ccc12	[417.11, 297.08, 267.07, 399.11, 167.07]
M420T211	420.15	3.52	C24H22ClN3O2	6.1	5-Chlorobifeprunox	[M+H]+	0.7774	29975741	1217042-04-0	Shikimates and Phenylpropanoids			O=c1[nH]c2cc(Cl)cc(N3CCN(Cc4cccc(-c5ccccc5)c4)CC3)c2o1	[167.07, 227.09, 420.27, 209.08, 402.26]
M423T622	423.235	10.36	C21H36O7	2.6	Bonactin	[M+Na]+	0.9879	11741721		Polyketides	Polyethers	Macrotetrolides	CCC(O)CC1CCC(C(C)C(=O)OC(C)CC2CCC(C(C)C(=O)O)O2)O1	[423.23, 423.32, 135.12, 405.32, 107.09]
M425T815	425.378	13.58	C30H50O2	0.2	Erythrodiol	[M+H-H2O]+	0.8885	101761	545-48-2					[425.38, 121.1, 95.09, 109.1, 107.09]
M427T904	427.303	15.06	C20H38N6O4	0.1	Leupeptin	[M+H]+	0.9992	72429	55123-66-5	Amino acids and Peptides	Small peptides	Tripeptides	CC(=O)N[C@@H](CC(C)C)C(=O)N[C@@H](CC(C)C)C(=O)N[C@H](C=O)CCCN=C(N)N	[427.3, 147.04, 428.31, 427.46, 427.15]
M431T411	431.095	6.85	C27H28O14	5.8	8-C-(2-Rhamnosyl-6-deoxyhexopyranosulyl)luteolin	[M+H-C6H10O4]+	0.929	102040777	933463-03-7	Shikimates and Phenylpropanoids	Flavonoids	Flavones	C[C@@H]1O[C@@H](O[C@@H]2C(=O)[C@H](O)[C@@H](C)O[C@H]2c2c(O)cc(O)c3c(=O)cc(-c4ccc(O)c(O)c4)oc23)[C@H](O)[C@H](O)[C@H]1O	[431.09, 413.08, 169.01, 327.05, 273.08]
M433T280	433.113	4.67	C19H22O10	6.2	Aloenin	[M+Na]+	0.9816	97290318	38412-46-3	Polyketides	Cyclic polyketides	2-pyrone derivatives	COc1cc(-c2c(C)cc(O)cc2O[C@H]2O[C@H](CO)[C@@H](O)[C@H](O)[C@H]2O)oc(=O)c1	[271.06, 215.03, 283.06, 191.08, 433.16]
M443T759_2	443.352	12.66	C29H46O3	0.1	Testosterone decanoate	[M+H]+	0.956	155143	5721-91-5	Terpenoids	Steroids	Cholestane steroids	CCCCCCCCCC(=O)O[C@H]1CC[C@H]2[C@@H]3CCC4=CC(=O)CC[C@]4(C)[C@H]3CC[C@]12C	[443.35, 425.34, 173.13, 443.09, 95.09]
M445T406	445.204	6.77	C19H34O10	0	Oct-1-en-3-yl 6-O-((2R,3R,4R)-3,4-dihydroxy-4-(hydroxymethyl)tetrahydrofuran-2-yl)-.beta.-D-glucopyranoside	[M+Na]+	0.9942	51136465		Fatty acids	Fatty acyl glycosides	Fatty acyl glycosides of mono- and disaccharides	C=CC(CCCCC)O[C@@H]1O[C@H](CO[C@@H]2OC[C@](O)(CO)[C@H]2O)[C@@H](O)[C@H](O)[C@H]1O	[445.2, 333.08, 445.05, 446.21, 427.03]
M446T634_2	446.326	10.57	C27H45NO5	0.5	N-((4R)-4-((3R,5S,9S,10S,12S,13R,14S,17R)-3,12-dihydroxy-10,13-dimethylhexadecahydro-1H-cyclopenta[a]phenanthren-17-yl)pentanoyl)-N-methylglycine	[M-H2O+H]+	0.7518	144316960		Terpenoids	Steroids	Cholane steroids	C[C@H](CCC(=O)N(C)CC(=O)O)[C@H]1CC[C@H]2[C@@H]3CC[C@@H]4C[C@H](O)CC[C@]4(C)[C@H]3C[C@H](O)[C@@]21C	[428.32, 446.33, 90.06, 339.27, 447.23]
M447T426_2	447.129	7.1	C22H22O10	0.5	3-(4-Hydroxyphenyl)-5-methoxy-4-oxo-4H-chromen-7-yl .beta.-D-glucopyranoside	[M+H]+	0.9949	189922	128856-77-9	Shikimates and Phenylpropanoids	Isoflavonoids	Isoflavones	COc1cc(OC2OC(CO)C(O)C(O)C2O)cc2occ(-c3ccc(O)cc3)c(=O)c12	[285.08, 270.05, 271.06, 284.99, 285.16]
M461T430_1	461.108	7.17	C22H20O11	0.5	Oroxyloside	[M+H]+	0.9983	14655552	36948-76-2	Shikimates and Phenylpropanoids	Flavonoids	Flavones	COc1c(O[C@@H]2O[C@H](C(=O)O)[C@@H](O)[C@H](O)[C@H]2O)cc2oc(-c3ccccc3)cc(=O)c2c1O	[285.08, 270.05, 461.11, 284.99, 270.02]
M463T347	463.123	5.79	C22H22O11	0.3	Tectoridin	[M+H]+	0.999	5281810	611-40-5	Shikimates and Phenylpropanoids	Isoflavonoids	Isoflavones	COc1c(O[C@@H]2O[C@H](CO)[C@@H](O)[C@H](O)[C@H]2O)cc2occ(-c3ccc(O)cc3)c(=O)c2c1O	[301.07, 286.05, 463.22, 168.01, 186.02]
M463T381_2	463.123	6.35	C22H22O11	0.5	Hispiduloside	[M+H]+	0.9912	5318083	17680-84-1	Shikimates and Phenylpropanoids	Flavonoids	Flavones	COc1c(OC2OC(CO)C(O)C(O)C2O)cc2oc(-c3ccc(O)cc3)cc(=O)c2c1O	[301.07, 286.05, 463.12, 168.01, 85.03]
M463T365	463.124	6.08	C27H30O15	3.6	Tectorigenin, 7-O-[.beta.-D-apiofuranosyl-(1-6)-.beta.-D-glucopyranosid]	[M+H-C5H8O4]+	0.997	23786445	365544-05-4	Shikimates and Phenylpropanoids	Isoflavonoids	Isoflavones	COc1c(O[C@@H]2O[C@H](CO[C@H]3OC[C@](O)(CO)[C@H]3O)[C@@H](O)[C@H](O)[C@H]2O)cc2occ(-c3ccc(O)cc3)c(=O)c2c1O	[301.07, 286.05, 463.11, 242.04, 258.05]
M465T768	465.3	12.8	C29H40N2O3	23	U-73122	[M+H]+	0.7385	104794	112648-68-7	Terpenoids	Steroids		COc1ccc2c(c1)CC[C@@H]1[C@@H]2CC[C@]2(C)[C@@H](NCCCCCCN3C(=O)C=CC3=O)CC[C@@H]12	[465.3, 137.06, 163.08, 177.09, 203.11]
M466T424	466.265	7.07	C21H36O10	0	(2E)-3,7-Dimethylocta-2,6-dien-1-yl 6-O-.alpha.-L-arabinofuranosyl-.beta.-D-glucopyranoside	[M+NH4]+	0.9566	15624181	84534-32-7	Terpenoids	Monoterpenoids	Acyclic monoterpenoids	CC(C)=CCC/C(C)=C/CO[C@@H]1O[C@H](CO[C@@H]2O[C@@H](CO)[C@H](O)[C@H]2O)[C@@H](O)[C@H](O)[C@H]1O	[137.13, 81.07, 115.04, 85.03, 97.03]
M467T979	467.091	16.31	C20H20O14	19.2	Hamamelitannin	[M+H-H2O]+	0.9889	21145076	469-32-9	Shikimates and Phenylpropanoids	Phenolic acids (C6-C1)	Gallotannins+Simple phenolic acids	O=C[C@@](O)(COC(=O)c1cc(O)c(O)c(O)c1)[C@H](O)[C@H](O)COC(=O)c1cc(O)c(O)c(O)c1	[467.09, 439.1, 51.9, 383.11, 411.1]
M467T811	467.316	13.52	C36H58O12	1.3	2,3,16,20,25-Pentahydroxycucurbita-5-ene-11,22-dione-3-O-glucoside	[M+H-C6H16O8]+	0.9809	23900089	129393-23-3	Terpenoids	Triterpenoids	Cucurbitane triterpenoids	CC(C)(O)CCC(=O)C(C)(O)C1C(O)CC2(C)C3CC=C4C(CC(O)C(OC5OC(CO)C(O)C(O)C5O)C4(C)C)C3(C)C(=O)CC12C	[467.32, 313.18, 51.92, 231.14, 449.31]
M469T793	469.331	13.22	C30H46O5	1.5	Ncgc00384869-01!4,4,8,10,14-pentamethyl-17-(4,5,6-trihydroxy-6-methylheptan-2-yl)-2,5,6,7,9,15-hexahydro-1h-cyclopenta[a]phenanthrene-3,16-dione	[M-H2O+H]+	0.9298	75411999	156338-93-1	Terpenoids	Triterpenoids	Dammarane and Protostane triterpenoids+Fusidane triterpenoids	CC(CC(O)C(O)C(C)(C)O)C1=C2C=CC3C4(C)CCC(=O)C(C)(C)C4CCC3(C)C2(C)CC1=O	[469.33, 451.32, 469.07, 121.1, 119.09]
M474T685	474.366	11.41	C26H51NO4S	9.3	N-Nervonoyltaurine	[M+H]+	0.921	71684549		Fatty acids	Fatty amides	N-acyl amines	CCCCCCCC/C=C\CCCCCCCCCCCCCC(=O)NCCS(=O)(=O)O	[474.37, 438.34, 123.12, 456.36, 121.07]
M477T978	477.199	16.3	C28H28O7	20.4	MUNDULONE ACETATE	[M+H]+	0.8921	6857790		Shikimates and Phenylpropanoids	Isoflavonoids	Isoflavones	COc1c(-c2coc3cc4c(cc3c2=O)CC(OC(C)=O)C(C)(C)O4)ccc2c1C=CC(C)(C)O2	[477.2, 124.94, 142.95, 459.19, 53.02]
M487T672_1	487.081	11.21	C21H20O12	6.5	Isoquercitin	[M+Na]+	0.9506	10813969	21637-25-2	Shikimates and Phenylpropanoids	Flavonoids	Flavonols	O=c1c(O[C@H]2O[C@@H](CO)[C@H](O)[C@@H](O)[C@@H]2O)c(-c2ccc(O)c(O)c2)oc2cc(O)cc(O)c12	[487.08, 469.07, 133.03, 441.08, 413.08]
M499T909	499.376	15.15	C32H50O4	4.3	3-(Acetyloxy)lanosta-8,24-dien-21-oic acid	[M+H]+	0.9823	71207558	1349701-97-8	Terpenoids	Triterpenoids	Lanostane, Tirucallane and Euphane triterpenoids	CC(=O)OC1CCC2(C)C3=C(CCC2C1(C)C)C1(C)CCC(C(CCC=C(C)C)C(=O)O)C1(C)CC3	[499.38, 55.49, 499.08, 500.38, 102.13]
M506T576	506.16	9.6	C31H23NO6	1.2	Ampkinone	[M+H]+	0.9526	49843507	1233082-79-5				COc1ccc2c(c1O)OC(C)(C)c1c-2ccc2c1C(=O)N(c1ccc(C(=O)c3ccccc3)cc1)C2=O	[506.16, 477.13, 344.06, 488.15, 343.06]
M511T965	511.295	16.09	C26H42N2O6S	21.9	Leukotriene D4 methyl ester	[M+H]+	0.9955	71684544		Fatty acids	Eicosanoids	Leukotrienes	CCCCC/C=C\C/C=C\C=C/C=C\C(SCC(N)C(=O)NCC(=O)O)[C@@H](O)CCCC(=O)OC	[511.29, 275.12, 56.81, 229.16, 512.3]
M511T801	511.34	13.34	C30H48O5	4.7	Alisol F	[M+Na]+	0.9798	75412000	155521-45-2	Terpenoids	Triterpenoids	Fusidane triterpenoids	C[C@@H]1C[C@@H]([C@@H](O)C(C)(C)O)O[C@H]2C[C@@]3(C)C(=C21)C[C@H](O)[C@H]1[C@@]2(C)CCC(=O)C(C)(C)C2CC[C@@]13C	[511.34, 189.16, 511.08, 247.13, 107.09]
M513T48	513.122	0.8	C25H25ClN4O2S2	6.9	Pirinixic acid aminothiazole	[M+H]+	0.9727	72735056	1492060-44-2	Alkaloids			CCCCCCC(Sc1nc(Cl)cc(Nc2nc(-c3ccc4ccccc4c3)cs2)n1)C(=O)O	[513.12, 57.01, 351.07, 333.06, 514.12]
M513T778	513.357	12.97	C30H50O5	2.8	Alisol A	[M+Na]+	0.997	15558616	19885-10-0	Terpenoids	Triterpenoids	Dammarane and Protostane triterpenoids+Fusidane triterpenoids	CC(CC(O)C(O)C(C)(C)O)C1=C2CC(O)C3C4(C)CCC(=O)C(C)(C)C4CCC3(C)C2(C)CC1	[513.36, 57.04, 512.83, 514.36, 513.06]
M513T563	513.358	9.39	C32H48O5	1	Acetyl-11-oxo-.beta.-boswellic acid	[M+H]+	0.9156	11168203	67416-61-9					[513.36, 513.28, 495.35, 119.09, 435.33]
M514T386	514.28	6.44	C29H37N3O4	24.8	CAY10493	[M+Na]+	0.9466	34176700	1044764-11-5	Alkaloids	Tryptophan alkaloids	Carboline alkaloids	CC(C)(C)OC(=O)c1ccc(Cn2ccc3c(N4CCN(C(=O)OC(C)(C)C)CC4)cccc32)cc1	[514.28, 426.23, 398.23, 57.14, 324.2]
M515T809_2	515.373	13.49	C32H50O5	0.5	27-(Acetyloxy)-3-hydroxylup-20(29)-en-28-oic acid	[M+H]+	0.8794	102571639		Terpenoids	Triterpenoids	Lupane triterpenoids	C=C(C)C1CCC2(C(=O)O)CCC3(COC(C)=O)C(CCC4C5(C)CCC(O)C(C)(C)C5CCC43C)C12	[515.37, 437.34, 243.17, 121.07, 261.18]
M518T712	518.29	11.87	C27H45NO5S	0.5	Cysteine conjugated chenodeoxycholic acid	[M+Na]+	0.9322	145740484		Terpenoids	Steroids	Cholane steroids	C[C@H](CCC(=O)NC(CS)C(=O)O)[C@H]1CC[C@H]2[C@H]3[C@H](CC[C@@]21C)[C@@]1(C)CC[C@@H](O)C[C@H]1C[C@H]3O	[518.29, 57.59, 500.08, 89.06, 438.3]
M523T158	523.121	2.64	C25H24O11	0.2	Catechin pentaacetate	[M+Na]+	0.9965	5315742		Shikimates and Phenylpropanoids	Flavonoids	Flavan-3-ols	CC(=O)Oc1cc(OC(C)=O)c2c(c1)OC(c1ccc(OC(C)=O)c(OC(C)=O)c1)C(OC(C)=O)C2	[523.12, 58.13, 219.02, 237.03, 98.98]
M526T804_1	526.329	13.4	C28H47NO8	15.1	Picromycin	[M+H]+	0.933	75368718	19721-56-3	Polyketides	Macrolides	Erythromycins	CC[C@H]1OC(=O)[C@H](C)C(=O)[C@H](C)[C@@H](OC2O[C@H](C)C[C@H](N(C)C)[C@H]2O)[C@@H](C)C[C@@H](C)C(=O)/C=C/[C@]1(C)O	[526.33, 86.1, 125.0, 163.02, 181.03]
M527T805_2	527.335	13.42	C30H48O6	1.3	(2.alpha.,3.beta.,5.xi.,9.xi.,19.alpha.)-2,3,19,23-Tetrahydroxyolean-12-en-28-oic acid	[M+Na]+	0.9452	23928125		Terpenoids	Triterpenoids	Oleanane triterpenoids	CC1(C)CCC2(C(=O)O)CCC3(C)C(=CCC4C5(C)CC(O)C(O)C(C)(CO)C5CCC43C)C2C1O	[527.33, 86.1, 125.0, 163.02, 87.1]
M530T873	530.355	14.54	C26H54NO6P	0.5	C18(Plasm) LPC	[M+Na]+	0.9401	24779527	97802-55-6	Fatty acids	Glycerophospholipids	Glycerophosphocholines	CCCCCCCCCCCCCCCC/C=C\OC[C@@H](O)COP(=O)([O-])OCC[N+](C)(C)C	[471.28, 530.36, 104.11, 86.1, 146.98]
M539T636	539.097	10.6	C30H18O10	0.1	Amentoflavone	[M+H]+	0.9735	5281600	1617-53-4	Shikimates and Phenylpropanoids	Flavonoids	Flavones	O=c1cc(-c2ccc(O)c(-c3c(O)cc(O)c4c(=O)cc(-c5ccc(O)cc5)oc34)c2)oc2cc(O)cc(O)c12	[539.1, 105.03, 419.04, 271.06, 270.05]
M539T841	539.319	14.02	C27H48O9	0.3	3-(.beta.-D-Galactopyranosyloxy)-2-hydroxypropyl (9Z,12Z)-octadeca-9,12-dienoate	[M+Na]+	0.9951	5320254	88110-55-8	Fatty acids	Glycerolipids	Glycosylmonoacylglycerols	CCCCC/C=C\C/C=C\CCCCCCCC(=O)OCC(O)CO[C@@H]1O[C@H](CO)[C@H](O)[C@H](O)[C@H]1O	[539.32, 59.93, 539.1, 540.32, 154.16]
M547T408	547.29	6.8	C32H38N2O6	18.5	Channaine	[M+H]+	0.8294	51136501	1355-47-1	Alkaloids	Tyrosine alkaloids	Isoquinoline alkaloids	COc1ccc(C23C=C4C5CC6(O)CC7N(CCC57c5ccc(OC)c(OC)c5)C4(CC2NCC3)O6)cc1OC	[529.28, 511.27, 547.29, 493.26, 547.18]
M549T914	549.303	15.23	C28H46O9	1.4	(3.beta.,5.beta.,9.beta.,10.alpha.,13.alpha.,15R)-16-(.beta.-D-Galactopyranosyloxy)-3-hydroxypimar-8(14)-en-15-yl acetate	[M+Na]+	0.9926	24066831		Terpenoids	Diterpenoids	Pimarane and Isopimarane diterpenoids	CC(=O)OC(COC1OC(CO)C(O)C(O)C1O)C1(C)C=C2CCC3C(C)(C)C(O)CCC3(C)C2CC1	[549.3, 233.03, 61.03, 550.3, 531.29]
M553T848	553.298	14.13	C15H20N2O3	6.2	5-(4-Isoamoxyphenyl)-5-methylhydantoin	[2M+H]+	0.9335	2835307	68524-21-0	Alkaloids	Peptide alkaloids	Simple diketopiperazine alkaloids	CC(C)CCOc1ccc(C2(C)NC(=O)NC2=O)cc1	[553.3, 61.48, 553.08, 554.3, 377.27]
M557T303	557.163	5.06	C26H30O12	0.4	Aegineoside	[M+Na]+	0.9958	132353271	752209-48-6	Shikimates and Phenylpropanoids	Lignans	Neolignans	COc1cc([C@@H]2Oc3c(OC)cc(/C=C/C(=O)O)cc3[C@H]2CO)ccc1O[C@@H]1O[C@H](CO)[C@@H](O)[C@H](O)[C@H]1O	[557.16, 61.91, 539.3, 137.06, 479.28]
M565T273_2	565.117	4.56	C30H22O10	11.1	Neochamaejasmin	[M+Na]+	0.9326	390362	185943-95-7	Shikimates and Phenylpropanoids	Flavonoids	Flavanones	O=C1c2c(O)cc(O)cc2OC(c2ccc(O)cc2)C1C1C(=O)c2c(O)cc(O)cc2OC1c1ccc(O)cc1	[565.12, 217.03, 389.08, 547.11, 371.07]
M565T241	565.155	4.02	C26H28O14	0.1	4H-1-Benzopyran-4-one, 6-arabinopyranosyl-8-.beta.-D-glucopyranosyl-5,7-dihydroxy-2-(4-hydroxyphenyl)-	[M+H]+	0.955	13644660	52012-29-0,35927-38-9	Shikimates and Phenylpropanoids	Flavonoids	Flavones	O=c1cc(-c2ccc(O)cc2)oc2c(C3OC(CO)C(O)C(O)C3O)c(O)c(C3OCC(O)C(O)C3O)c(O)c12	[427.1, 379.08, 529.13, 547.14, 511.12]
M571T449_1	571.142	7.49	C26H28O13	0.2	Rubiadin-primveroside	[M+Na]+	0.9876	213463	26388-47-6	Polyketides	Polycyclic aromatic polyketides	Anthraquinones and anthrones	Cc1c(O[C@@H]2O[C@H](CO[C@@H]3OC[C@@H](O)[C@H](O)[C@H]3O)[C@@H](O)[C@H](O)[C@H]2O)cc2c(c1O)C(=O)c1ccccc1C2=O	[571.14, 63.46, 317.08, 572.15, 184.07]
M571T850	571.361	14.17	C31H46N4O6	20.3	6-Benzyl-3-butan-2-yl-9-(7-hydroxy-6-oxooctyl)-1,4,7,10-tetrazabicyclo[10.4.0]hexadecane-2,5,8,11-tetrone	[M+H]+	0.9541	45359470	561045-45-2	Amino acids and Peptides	Oligopeptides	Cyclic peptides	CCC(C)C1NC(=O)C(Cc2ccccc2)NC(=O)C(CCCCCC(=O)C(C)O)NC(=O)C2CCCCN2C1=O	[571.36, 263.16, 247.13, 161.09, 262.15]
M575T640	575.302	10.66	C35H46O9	4.1	Asperphenalenone E	[M+H-2H2O]+	0.9436	44715165	2170730-35-3	Polyketides+Terpenoids			C/C(=C\CC/C(C)=C/CC1(O)C(=O)c2c(O)cc(C)c3c(O)c(C)c(O)c(c23)C1=O)CC/C=C(\CO)CCC(O)C(C)(C)O	[575.31, 389.18, 227.13, 203.05, 63.92]
M575T894	575.414	14.9	C15H29NO4	22.7	Octanoylcarnitine	[2M+H]+	0.7828	11953814	25243-95-2	Fatty acids	Fatty esters	Fatty acyl carnitines	CCCCCCCC(=O)O[C@H](CC(=O)[O-])C[N+](C)(C)C	[575.41, 63.94, 576.42, 575.17, 575.65]
M699T726	699.408	12.09	C34H60O13	22.3	(2S,3R)-2,3,4-Trihydroxybutyl 4,6-di-O-acetyl-2-O-hexanoyl-3-O-tetradecanoyl-.beta.-D-mannopyranoside	[M+Na]+	0.9954	56773940		Fatty acids	Fatty acyl glycosides	Fatty acyl glycosides of mono- and disaccharides	CCCCCCCCCCCCCC(=O)OC1C(OC(C)=O)C(COC(C)=O)OC(OCC(O)C(O)CO)C1OC(=O)CCCCC	[699.41, 77.71, 185.04, 700.41, 639.39]
M921T568	921.482	9.46	C52H70N2O11	5.7	Stachybocin C	[M+Na]+	0.9932	10677176	158827-62-4	Alkaloids	Pseudoalkaloids	Isoindole alkaloids	C[C@@H]1CCC2C(C)(C)[C@H](O)[C@H](O)C[C@]2(C)[C@@]12Cc1c(O)cc3c(c1O2)CN(CCCC[C@@H](C(=O)O)N1Cc2c(cc(O)c4c2O[C@]2(C4)[C@H](C)CCC4C(C)(C)[C@H](O)CC[C@@]42C)C1=O)C3=O	[921.48, 347.09, 861.46, 102.39, 365.11]
M165T232	165.019	3.87	C8H8O5	0.3	3,4-Dihydroxymandelic acid	[M-H-H2O]-	0.9945	85782	14883-87-5	Shikimates and Phenylpropanoids	Phenylpropanoids (C6-C3)	Cinnamic acids and derivatives	O=C(O)C(O)c1ccc(O)c(O)c1	[121.03, 165.02, 121.05, 121.0, 121.01]
M475T351_2	475.088	5.84	C22H20O12	0.5	Hispidulin 7-glucuronide	[M-H]-	0.9403	162868115	31105-76-7	Shikimates and Phenylpropanoids	Flavonoids	Flavones	COc1c(O[C@H]2O[C@H](C(=O)O)[C@@H](O)[C@H](O)[C@H]2O)cc2oc(-c3ccc(O)cc3)cc(=O)c2c1O	[299.06, 284.03, 113.02, 85.03, 165.99]
M115T341	115.077	5.69	C6H12O2	2.2	Caproic acid	[M-H]-	0.7857	8892	142-62-1	Fatty acids	Fatty Acids and Conjugates	Branched fatty acids+Unsaturated fatty acids	CCCCCC(=O)O	[115.08, 115.92, 114.93, 99.93, 115.04]
M120T171	120.046	2.86	C8H9NO3S	1	3-(Methylsulfonamido)benzaldehyde	[M-H-CH2SO2]-	0.9969	2794787	55512-05-5				CS(=O)(=O)Nc1cccc(C=O)c1	[120.05, 121.03, 92.05, 120.07, 121.05]
M121T232	121.03	3.87	C7H6O2	1.2	4-Formylphenol	[M-H]-	0.9997	126	123-08-0	Shikimates and Phenylpropanoids	Phenolic acids (C6-C1)	Shikimic acids and derivatives+Simple phenolic acids	O=Cc1ccc(O)cc1	[121.03, 122.02, 56.16, 70.17, 89.18]
M121T401_2	121.066	6.69	C19H19NO3	0.1	ML-098	[M-H-C11H9NO2]-	0.9737	7345532	878978-76-8				Cc1ccc(C)c(OCCn2cc(C(=O)O)c3ccccc32)c1	[121.07, 106.04, 121.03, 122.03, 94.03]
M133T210	133.03	3.5	C8H8O3	1.2	3,2-Cresotic acid	[M-H-H2O]-	0.9326	252023	603-80-5	Shikimates and Phenylpropanoids	Phenolic acids (C6-C1)	Simple phenolic acids	Cc1c(O)cccc1C(=O)O	[133.03, 105.03, 123.05, 115.0, 133.02]
M144T89	144.066	1.49	C6H11NO3	4.3	4-Acetamidobutanoate	[M-H]-	0.9175	18189	3025-96-5	Fatty acids	Fatty Acids and Conjugates	Unsaturated fatty acids	CC(=O)NCCCC(=O)O	[144.07, 102.06, 100.08, 58.03, 126.06]
M145T226	145.03	3.77	C16H15NO3	0.3	o-Acetanisidide, 2-benzoyl-	[M-H-C7H9NO]-	0.9997	7079	92-16-0	Shikimates and Phenylpropanoids	Flavonoids	Chalcones	COc1ccccc1NC(=O)CC(=O)c1ccccc1	[145.03, 101.04, 146.03, 145.06, 145.0]
M149T155	149.024	2.58	C17H16O8	0	Asterric acid	[M-H-C9H10O5]-	0.9407	3080568	577-64-0	Polyketides	Diphenyl ethers (DPEs)	Fungal DPEs	COC(=O)c1cc(O)cc(OC)c1Oc1cc(C)cc(O)c1C(=O)O	[105.03, 149.02, 123.05, 77.04, 121.03]
M149T401	149.061	6.69	C10H12O4	0.8	.alpha.,4-Dihydroxybenzenebutanoic acid	[M-H-CH2O2]-	0.9838	17760167	855223-57-3	Shikimates and Phenylpropanoids			O=C(O)C(O)CCc1ccc(O)cc1	[149.06, 93.03, 73.03, 92.03, 120.02]
M152T218	152.036	3.63	C7H7NO3	0.7	2-Hydroxy-6-methylpyridine-4-carboxylic acid	[M-H]-	0.9184	276660	86454-13-9	Alkaloids	Nicotinic acid alkaloids	Pyridine alkaloids	Cc1cc(C(=O)O)cc(=O)[nH]1	[152.04, 93.02, 152.01, 153.02, 109.03]
M153T280	153.019	4.66	C7H6O4	1.7	2,6-Dihydroxybenzoic acid	[M-H]-	0.9988	9338	303-07-1	Shikimates and Phenylpropanoids	Phenolic acids (C6-C1)	Simple phenolic acids	O=C(O)c1c(O)cccc1O	[153.02, 109.03, 135.01, 65.04, 67.02]
M153T221	153.019	3.69	C7H6O4	0.5	2,3-Dihydroxybenzoic acid	[M-H]-	0.9876	19	303-38-8	Shikimates and Phenylpropanoids	Phenolic acids (C6-C1)	Simple phenolic acids	O=C(O)c1cccc(O)c1O	[109.03, 153.02, 108.02, 81.03, 109.04]
M154T194	154.015	3.23	C6H5NO4	0.6	Pyrrole-2,5-dicarboxylic acid	[M-H]-	0.9784	11846406	937-27-9	Shikimates and Phenylpropanoids			O=C(O)c1ccc(C(=O)O)[nH]1	[110.02, 66.03, 154.01, 110.02, 154.0]
M156T90_2	156.066	1.51	C7H13NO4	0.6	2-Aminopimelate	[M-H-H2O]-	0.9945	101122	627-76-9	Amino acids and Peptides	Small peptides	Aminoacids	NC(CCCCC(=O)O)C(=O)O	[156.07, 112.03, 110.02, 156.02, 84.05]
M158T242	158.036	4.03	C9H6N4OS	7.6	1-Mercapto[1,2,4]triazolo[4,3-a]quinoxalin-4(5H)-one	[M-H-CHNS]-	0.9991	2487501	540760-27-8	Alkaloids	Anthranilic acid alkaloids		O=c1[nH]c2ccccc2n2c(=S)[nH]nc12	[158.04, 159.04, 158.07, 158.07, 158.0]
M163T249_2	163.04	4.15	C24H28O11	0.3	Pagoside	[M-H-C15H20O8]-	0.9996	45783209	668420-44-8	Terpenoids			CC1=C(C(=O)O)/C(=C\CO[C@@H]2O[C@H](CO)[C@@H](O)[C@H](O)[C@H]2O)C(OC(=O)/C=C/c2ccc(O)cc2)C1	[163.04, 119.05, 163.0, 91.06, 93.03]
M165T297_2	165.056	4.95	C9H10O3	0.9	Dihydro-m-coumaric acid	[M-H]-	0.9951	91	621-54-5	Shikimates and Phenylpropanoids			O=C(O)CCc1cccc(O)c1	[121.07, 165.06, 119.05, 106.04, 147.05]
M165T237	165.056	3.94	C19H22O6	3.2	1,7-Bis(3,4-dihydroxyphenyl)-6-hydroxyheptan-3-one	[M-H-C10H12O3]-	0.9415	45783138	1174387-98-4	Shikimates and Phenylpropanoids	Diarylheptanoids	Linear diarylheptanoids	O=C(CCc1ccc(O)c(O)c1)CCC(O)Cc1ccc(O)c(O)c1	[121.03, 165.02, 165.06, 121.07, 122.03]
M166T280_1	166.025	4.66	C9H10O4	0.4	Methyl vanillate	[M-H-CH3]-	0.8498	19844	3943-74-6	Shikimates and Phenylpropanoids	Phenolic acids (C6-C1)	Simple phenolic acids	COC(=O)c1ccc(O)c(OC)c1	[151.0, 166.05, 166.03, 123.01, 94.03]
M168T395	168.03	6.59	C7H7NO4	0.6	2-Methoxy-5-nitrophenol	[M-H]-	0.9745	69471	636-93-1	Shikimates and Phenylpropanoids	Phenylpropanoids (C6-C3)	Cinnamic acids and derivatives	COc1ccc([N+](=O)[O-])cc1O	[153.01, 168.03, 123.01, 153.02, 95.01]
M169T222	169.014	3.71	C13H16O9	0.7	Ginnalin B	[M-H-C6H10O4]-	0.9771	44512370	82151-97-1	Shikimates and Phenylpropanoids	Phenolic acids (C6-C1)	Simple phenolic acids	O=C(OC[C@H]1OC[C@H](O)[C@@H](O)[C@@H]1O)c1cc(O)c(O)c(O)c1	[169.01, 125.02, 151.0, 97.03, 69.03]
M169T104	169.014	1.74	C7H6O5	0.3	Gallic acid	[M-H]-	0.9983	370	149-91-7	Shikimates and Phenylpropanoids	Phenolic acids (C6-C1)	Gallotannins+Simple phenolic acids	O=C(O)c1cc(O)c(O)c(O)c1	[125.02, 169.01, 97.03, 81.03, 69.03]
M170T281	170.025	4.69	C13H19NO4S	19.1	6-(Tosylamino)hexanoic acid	[M-H-C6H10O2]-	0.9988	95822	78521-39-8	Alkaloids			Cc1ccc(S(=O)(=O)NCCCCCC(=O)O)cc1	[170.02, 171.05, 102.04, 170.06, 170.06]
M170T70	170.045	1.17	C7H11NO5	0.4	N-Acetyl-L-glutamic acid	[M-H-H2O]-	0.993	70914	1188-37-0	Amino acids and Peptides	Small peptides	Dipeptides	CC(=O)N[C@@H](CCC(=O)O)C(=O)O	[128.04, 170.05, 70.03, 98.02, 126.06]
M172T252	172.098	4.19	C8H15NO3	1.3	N-Acetyl-D-norleucine	[M-H]-	0.9924	6995106	54896-21-8	Amino acids and Peptides	Small peptides	Dipeptides	CCCC[C@@H](NC(C)=O)C(=O)O	[130.09, 172.1, 173.02, 145.03, 172.04]
M179T403	179.071	6.71	C11H12O5	0.4	Sinapic acid	[M-H-CO2]-	0.8481	637775	530-59-6	Shikimates and Phenylpropanoids	Phenylpropanoids (C6-C3)	Cinnamic acids and derivatives	COc1cc(/C=C/C(=O)O)cc(OC)c1O	[164.05, 179.07, 179.0, 91.02, 135.01]
M180T1118	180.034	18.63	C5H11NO4S	1.9	Acamprosate	[M-H]-	0.7722	71158	77337-76-9				CC(=O)NCCCS(=O)(=O)O	[180.03, 79.96, 136.98, 180.97, 92.99]
M182T92	182.01	1.53	C10H10F6N2O6S2	14.1	N,N'-Bis(trifluoroacetyl)cystine	[M-H-C5H6F3NO3S2]-	0.7247	262739	402-91-5				O=C(O)C(CSSCC(NC(=O)C(F)(F)F)C(=O)O)NC(=O)C(F)(F)F	[182.01, 112.0, 111.01, 110.06, 182.04]
M183T53	183.007	0.89	C6H5ClN4O	7.9	2-Chloro-7-methylhypoxanthine	[M-H]-	0.9851	135408759	16017-76-8	Alkaloids	Pseudoalkaloids	Purine alkaloids	Cn1cnc2nc(Cl)[nH]c(=O)c21	[183.01, 183.08, 147.03, 129.02, 78.96]
M183T243	183.045	4.04	C10H8N4O	7.4	3-Amino-3,5-dihydro-4H-pyrimido[5,4-b]indol-4-one	[M-H-NH2]-	0.993	814497	110963-32-1	Alkaloids	Anthranilic acid alkaloids	Quinazoline alkaloids	Nn1cnc2c([nH]c3ccccc32)c1=O	[183.05, 155.05, 145.07, 173.06, 95.05]
M188T115	188.093	1.92	C9H11N5	5.6	6-Pyrrolidinopurine	[M-H]-	0.8777	756690	1928-89-8	Alkaloids	Pseudoalkaloids	Purine alkaloids	c1nc(N2CCCC2)c2[nH]cnc2n1	[188.09, 58.03, 170.08, 146.08, 144.1]
M189T119	188.986	1.98	C11H6O2S2	14.3	2-Carboxythieno[3,2-b]benzothiophene	[M-H-CO2]-	0.7885	901504	30126-05-7	Shikimates and Phenylpropanoids			O=C(O)c1cc2sc3ccccc3c2s1	[188.99, 109.03, 80.97, 79.96, 108.02]
M193T401_2	193.051	6.69	C10H10O4	0.4	Monoethyl phthalate	[M-H]-	0.9687	75318	2306-33-4	Shikimates and Phenylpropanoids	Phenolic acids (C6-C1)	Shikimic acids and derivatives+Simple phenolic acids	CCOC(=O)c1ccccc1C(=O)O	[193.05, 121.03, 121.07, 149.06, 147.01]
M194T222	194.028	3.7	C9H11NO3S	1.2	N-Tosylacetamide	[M-H-H2O]-	0.7599	286222	1888-33-1	Alkaloids			CC(=O)NS(=O)(=O)c1ccc(C)cc1	[194.03, 179.01, 152.02, 80.97, 150.0]
M194T217	194.046	3.62	C9H9NO4	0.1	Acetylmesalazine	[M-H]-	0.801	65512	51-59-2	Amino acids and Peptides+Shikimates and Phenylpropanoids	Small peptides	Aminoacids	CC(=O)Nc1ccc(O)c(C(=O)O)c1	[150.06, 108.05, 194.05, 94.03, 152.04]
M194T120	194.05	2	C6H13NO4S	1.1	Morpholinoethanesulfonic acid	[M-H]-	0.9953	78165	4432-31-9	Alkaloids	Lysine alkaloids	Piperidine alkaloids	O=S(=O)(O)CCN1CCOCC1	[194.05, 79.96, 106.98, 80.97, 124.01]
M195T184_1	195.03	3.07	C9H8O5	5	HAEMATOMMIC ACID	[M-H]-	0.7837	6710680		Shikimates and Phenylpropanoids	Phenolic acids (C6-C1)	Simple phenolic acids	Cc1cc(O)c(C=O)c(O)c1C(=O)O	[151.04, 195.03, 123.05, 108.02, 149.02]
M195T299	195.064	4.98	C10H12O4	12	Phloroisobutyrophenone	[M-H]-	0.988	5326317	35458-21-0	Polyketides	Phloroglucinols	Acyl phloroglucinols	CC(C)C(=O)c1c(O)cc(O)cc1O	[195.06, 127.08, 167.07, 169.08, 79.96]
M198T299	198.02	4.99	C12H8F3NO3	12.6	Ethyl 6,7,8-trifluoro-1,4-dihydro-4-oxoquinoline-3-carboxylate	[M-H-C3H4O2]-	0.8642	2733972	79660-46-1	Alkaloids			CCOC(=O)c1c[nH]c2c(F)c(F)c(F)cc2c1=O	[198.02, 170.02, 199.02, 198.07, 144.05]
M200T91_1	200.057	1.51	C8H13NO6	0.5	O-Succinyl-L-homoserine	[M-H-H2O]-	0.8298	954	1492-23-5	Amino acids and Peptides	Small peptides	Aminoacids	NC(CCOC(=O)CCC(=O)O)C(=O)O	[156.07, 200.06, 110.06, 182.05, 200.07]
M204T68	204.088	1.14	C17H22FNO4	23.6	Boc-(R)-.alpha.-(4-fluorobenzyl)proline	[M-H-C5H10O3]-	0.9222	2761832	706806-64-6	Alkaloids			CC(C)(C)OC(=O)N1CCC[C@@]1(Cc1ccc(F)cc1)C(=O)O	[204.09, 158.08, 115.0, 140.07, 116.07]
M210T231	210.077	3.85	C10H13NO4	3	3-Methoxytyrosine	[M-H]-	0.9827	1670	7636-26-2,4214-13-5,586954-09-8	Alkaloids	Tyrosine alkaloids	Phenylethylamines	COc1cc(CC(N)C(=O)O)ccc1O	[124.04, 94.03, 210.08, 109.02, 152.01]
M211T530	211.04	8.83	C13H8O3	1.5	Urolithin B	[M-H]-	0.9949	5380406	1139-83-9	Shikimates and Phenylpropanoids	Coumarins	Simple coumarins	O=c1oc2cc(O)ccc2c2ccccc12	[211.04, 210.03, 167.05, 212.04, 211.13]
M211T491	211.04	8.19	C13H8O3	0.7	4-Dibenzofurancarboxylic acid	[M-H]-	0.993	302872	2786-05-2	Shikimates and Phenylpropanoids	Coumarins	Simple coumarins	O=C(O)c1cccc2c1oc1ccccc12	[211.04, 167.05, 211.13, 183.05, 185.02]
M211T447_2	211.077	7.45	C14H12O2	1.3	Pinosylvin	[M-H]-	0.9914	5280457	22139-77-1	Shikimates and Phenylpropanoids	Stilbenoids	Monomeric stilbenes	Oc1cc(O)cc(/C=C/c2ccccc2)c1	[211.08, 169.07, 211.04, 211.1, 167.11]
M212T169	212.002	2.81	C8H7NO4S	1.6	Indoxyl sulfate	[M-H]-	0.7682	10258	487-94-5	Alkaloids	Tryptophan alkaloids	Simple indole alkaloids	O=S(=O)(O)Oc1c[nH]c2ccccc12	[132.05, 212.0, 79.96, 80.97, 148.04]
M218T264	218.046	4.4	C11H9NO4	0.2	2,3-Dihydro-2,3-dioxo-1H-indole-1-propanoic acid	[M-H]-	0.9969	1756678	81250-90-0	Alkaloids	Anthranilic acid alkaloids		O=C(O)CCN1C(=O)C(=O)c2ccccc21	[146.02, 218.05, 174.06, 158.04, 218.02]
M219T130_1	219.041	2.16	C10H8N2O4	0.2	Methyl 6-nitro-1H-indole-2-carboxylate	[M-H]-	0.9232	11816863	136818-66-1	Alkaloids	Tryptophan alkaloids	Simple indole alkaloids	COC(=O)c1cc2ccc([N+](=O)[O-])cc2[nH]1	[219.04, 148.04, 189.03, 118.03, 147.06]
M221T292	221.046	4.87	C11H10O5	1.7	Isofraxidin	[M-H]-	0.9726	5318565	486-21-5	Shikimates and Phenylpropanoids	Coumarins	Simple coumarins	COc1cc2ccc(=O)oc2c(OC)c1O	[206.02, 191.0, 221.05, 163.0, 135.01]
M221T248	221.046	4.14	C11H10O5	1	5-Carboxymellein	[M-H]-	0.9041	5242129	69135-42-8	Shikimates and Phenylpropanoids	Coumarins	Isocoumarins	CC1Cc2c(C(=O)O)ccc(O)c2C(=O)O1	[133.07, 221.05, 159.05, 131.05, 177.06]
M229T75	229.033	1.25	C14H11NO6	21.4	2-(4-Methoxyphenoxy)-5-nitrobenzoic acid	[M-H-C2H3O2]-	0.9054	2800866	33459-12-0	Shikimates and Phenylpropanoids			COc1ccc(Oc2ccc([N+](=O)[O-])cc2C(=O)O)cc1	[117.02, 73.03, 139.0, 112.99, 99.01]
M229T301	229.108	5.01	C11H18O5	0.2	2-(6-Hydroxyhexyl)-3-methylenesuccinic acid	[M-H]-	0.9868	23872059	910618-14-3	Fatty acids	Fatty Acids and Conjugates	Dicarboxylic acids+Hydroxy fatty acids	C=C(C(=O)O)C(CCCCCCO)C(=O)O	[185.12, 229.11, 139.11, 186.12, 230.11]
M230T209	230.013	3.49	C8H9NO5S	0.7	Acetaminophen sulfate	[M-H]-	0.7543	83939	10066-90-7	Shikimates and Phenylpropanoids			CC(=O)Nc1ccc(OS(=O)(=O)O)cc1	[108.05, 150.06, 230.01, 96.96, 79.96]
M235T405	235.089	6.75	C15H12N2O	4.6	5-Benzamidoindole	[M-H]-	0.9119	2814138	6019-39-2	Alkaloids	Tryptophan alkaloids	Simple indole alkaloids	O=C(Nc1ccc2[nH]ccc2c1)c1ccccc1	[235.09, 79.96, 235.59, 145.93, 101.94]
M236T102	236.056	1.69	C11H11NO5	0.3	3-(3-Carboxypropanoylamino)benzoic acid	[M-H]-	0.9873	757562	259222-20-3	Amino acids and Peptides+Shikimates and Phenylpropanoids	Small peptides	Aminoacids	O=C(O)CCC(=O)Nc1cccc(C(=O)O)c1	[236.06, 134.06, 206.05, 108.05, 94.03]
M236T345	236.097	5.76	C9H19NO4S	1.6	CAPSO	[M-H]-	0.9184	2733480	73463-39-5				O=S(=O)(O)CC(O)CNC1CCCCC1	[236.1, 145.93, 101.94, 79.96, 106.98]
M237T665	237.15	11.08	C14H22O3	0.5	MCULE-2036056204	[M-H]-	0.9833	14241024		Terpenoids	Sesquiterpenoids	Drimane sesquiterpenoids	CC1(C)CCCC2(C)C=C(C(=O)O)C(O)CC12	[237.15, 57.03, 195.14, 237.05, 193.16]
M241T171_2	240.982	2.85	C9H6O6S	1.8	Umbelliferone sulfate	[M-H]-	0.9573	129659	69526-88-1	Shikimates and Phenylpropanoids	Coumarins	Simple coumarins	O=c1ccc2ccc(OS(=O)(=O)O)cc2o1	[161.02, 80.97, 240.98, 126.91, 150.92]
M243T287	243.03	4.79	C6H13O8P	10.1	L-Fucose 1-phosphate	[M-H]-	0.7456	439871	16562-58-6	Carbohydrates	Saccharides	Monosaccharides	C[C@@H]1OC(OP(=O)(O)O)[C@@H](O)[C@H](O)[C@@H]1O	[243.03, 173.02, 155.11, 145.03, 201.02]
M245T252_1	245.013	4.19	C11H6ClF3N2O2	10.9	1-(4-Chlorophenyl)-5-(trifluoromethyl)pyrazole-4-carboxylic acid	[M-H-CO2]-	0.7641	688687	98534-80-6	Alkaloids			O=C(O)c1cnn(-c2ccc(Cl)cc2)c1C(F)(F)F	[245.01, 165.06, 121.07, 163.04, 119.05]
M248T373	248.097	6.21	C13H15NO4	14.7	2-Methyl-3-[(tetrahydro-2-furanylcarbonyl)amino]benzoic acid	[M-H]-	0.9748	3161224	876890-63-0				Cc1c(NC(=O)C2CCCO2)cccc1C(=O)O	[248.1, 79.96, 106.98, 80.97, 124.01]
M250T251	250.072	4.18	C12H13NO5	4	N-Phenylacetylaspartic acid	[M-H]-	0.9332	562665	2752-32-1	Amino acids and Peptides	Small peptides	Dipeptides	O=C(O)CC(NC(=O)Cc1ccccc1)C(=O)O	[132.03, 88.04, 250.07, 115.0, 91.06]
M252T96	252.055	1.6	C17H12ClNO2	14.9	7-Chloro-8-methyl-2-phenylcinchoninic acid	[M-H-CO2]-	0.8545	237084	500346-26-9	Alkaloids	Anthranilic acid alkaloids		Cc1c(Cl)ccc2c(C(=O)O)cc(-c3ccccc3)nc12	[252.06, 124.01, 79.96, 106.98, 80.97]
M256T273	256.065	4.55	C11H15NO4S	1.9	Metolachlor cga 368208	[M-H]-	0.9737	71312480	446027-17-4				CCc1cccc(C)c1NC(=O)CS(=O)(=O)O	[256.07, 79.96, 124.01, 106.98, 80.97]
M259T292_1	259.025	4.86	C13H8O6	0.7	Demethylbellidifolin	[M-H]-	0.736	5281626	2980-32-7	Polyketides+Shikimates and Phenylpropanoids	Xanthones	Methyl xanthones	O=c1c2c(O)cc(O)cc2oc2c(O)ccc(O)c12	[259.03, 231.03, 203.04, 144.02, 147.05]
M265T543	265.014	9.05	C16H11NO2S	22.1	3-Methoxybenzo[4,5]thieno[2,3-c]quinolin-6-ol	[M-H-CH3]-	0.9387	5091486	113425-00-6	Alkaloids	Tryptophan alkaloids	Carbazole alkaloids	COc1ccc2c(c1)[nH]c(=O)c1sc3ccccc3c12	[265.01, 237.02, 193.03, 171.05, 209.02]
M265T82	265.093	1.37	C17H14O3	22.6	2-HBA	[M-H]-	0.8844	5472867	131359-24-5	Shikimates and Phenylpropanoids	Diarylheptanoids	Linear diarylheptanoids	O=C(/C=C/c1ccccc1O)/C=C/c1ccccc1O	[265.09, 103.04, 59.01, 89.02, 101.02]
M268T484_1	268.033	8.07	C17H14O6	15.8	Isorhodoptilometrin	[M-H-C2H5O]-	0.7318	23267431	97995-25-0	Polyketides	Polycyclic aromatic polyketides	Anthraquinones and anthrones	CC(O)Cc1cc(O)c2c(c1)C(=O)c1cc(O)cc(O)c1C2=O	[268.03, 224.04, 196.05, 223.04, 269.05]
M269T479	269.176	7.98	C15H26O4	0.8	2-Dec-9-enylglutaric acid	[M-H]-	0.7535	57509489	1379769-97-7	Fatty acids	Fatty Acids and Conjugates	Dicarboxylic acids	C=CCCCCCCCCC(CCC(=O)O)C(=O)O	[269.18, 269.05, 181.12, 89.02, 87.05]
M273T418	273.042	6.97	C16H16O10	0.7	3-Carbomethoxy-3-hydroxy-2-[(E)-3-(4-hydroxyphenyl)acryloyl]oxyglutaric acid	[M-H-C2H6O4]-	0.7034	45360011	1083193-24-1	Shikimates and Phenylpropanoids	Phenylpropanoids (C6-C3)	Cinnamic acids and derivatives	COC(=O)C(O)(CC(=O)O)C(OC(=O)/C=C/c1ccc(O)cc1)C(=O)O	[273.04, 153.02, 109.03, 135.01, 255.03]
M273T506	273.056	8.44	C18H10O3	1.1	Bindone	[M-H]-	0.9751	15569	1707-95-5	Polyketides	Polycyclic aromatic polyketides	Anthraquinones and anthrones	O=C1CC(=C2C(=O)c3ccccc3C2=O)c2ccccc21	[273.06, 245.06, 274.06, 217.07, 273.13]
M274T417	274.036	6.95	C15H13NO3S2	2.8	Epalrestat	[M-H-CO2]-	0.8055	1549120	82159-09-9	Shikimates and Phenylpropanoids			CC(/C=C1\SC(=S)N(CC(=O)O)C1=O)=C\c1ccccc1	[274.04, 172.04, 187.04, 174.06, 158.04]
M275T307	275.114	5.11	C18H20FN3O4	21.6	Ofloxacin	[M-H-C4H5O2]-	0.8889	4583	82419-36-1	Alkaloids			CC1COc2c(N3CCN(C)CC3)c(F)cc3c(=O)c(C(=O)O)cn1c23	[275.11, 72.99, 169.12, 239.09, 185.12]
M275T775	275.202	12.91	C18H28O2	0.5	9,12-Octadecadiynoic acid	[M-H]-	0.9992	1931	2012-14-8	Fatty acids	Fatty Acids and Conjugates	Unsaturated fatty acids	CCCCCC#CCC#CCCCCCCCC(=O)O	[275.2, 231.21, 275.17, 276.21, 59.01]
M277T303	277.108	5.06	C15H18O5	0.5	Lecocarpinolide H	[M-H]-	0.9926	24094150	145108-35-6	Terpenoids	Sesquiterpenoids	Germacrane sesquiterpenoids	C=C1C(=O)O[C@@H]2/C=C(\CO)CC/C=C(/C=O)C[C@@H](O)[C@@H]12	[277.11, 259.1, 121.03, 231.1, 203.11]
M277T347	277.108	5.78	C15H18O5	0.6	1-(3-Furyl)-4,6-dihydroxy-5,8a-dimethyl-4,6,7,8-tetrahydro-1H-isochromen-3-one	[M-H]-	0.9906	45359558	1212371-43-1	Terpenoids			CC1=C2C(O)C(=O)OC(c3ccoc3)C2(C)CCC1O	[277.11, 121.03, 259.1, 189.06, 277.08]
M277T762	277.181	12.7	C14H30O3S	9.2	tetradecane-7-sulfonic acid	[M-H]-	0.9544	14227602		Fatty acids	Fatty acyls	Hydrocarbons	CCCCCCCC(CCCCCC)S(=O)(=O)O	[277.18, 59.01, 205.16, 233.19, 277.21]
M279T806	279.233	13.43	C18H32O2	1.2	Linoleate	[M-H]-	0.7687	5280450	60-33-3	Fatty acids	Fatty Acids and Conjugates	Unsaturated fatty acids	CCCCC/C=C\C/C=C\CCCCCCCC(=O)O	[279.23, 237.22, 127.11, 280.24, 238.23]
M280T195	280.084	3.25	C16H15N3S	18.3	4-Phenyl-5-(2-phenylethyl)-4H-1,2,4-triazol-3-yl hydrosulfide	[M-H]-	0.968	801534	114246-71-8	Alkaloids			S=c1[nH]nc(CCc2ccccc2)n1-c1ccccc1	[280.09, 124.01, 79.96, 106.98, 153.87]
M282T83_2	282.084	1.38	C10H13N5O5	0.1	Guanosine	[M-H]-	0.9868	135398635	118-00-3	Carbohydrates	Nucleosides	Purine nucleos(t)ides	Nc1nc2c(ncn2[C@@H]2O[C@H](CO)[C@@H](O)[C@H]2O)c(=O)[nH]1	[150.04, 282.08, 133.02, 126.03, 108.02]
M283T444_2	283.025	7.4	C15H8O6	0.1	Rhein	[M-H]-	0.9419	10168	478-43-3	Polyketides	Polycyclic aromatic polyketides	Anthraquinones and anthrones	O=C(O)c1cc(O)c2c(c1)C(=O)c1cccc(O)c1C2=O	[239.03, 283.02, 211.04, 195.05, 284.03]
M283T530_2	283.025	8.83	C15H10O7	0.7	Viscidulin I	[M-H-H2O]-	0.9062	5320471	92519-95-4	Shikimates and Phenylpropanoids	Flavonoids	Flavonols	O=c1c(O)c(-c2c(O)cccc2O)oc2cc(O)cc(O)c12	[239.03, 283.02, 211.04, 195.05, 265.01]
M283T877_1	283.07	14.62	C14H21BrO	0.4	4-Bromo-2,6-di-tert-butylphenol	[M-H]-	0.9996	70829	1139-52-2	Shikimates and Phenylpropanoids			CC(C)(C)c1cc(Br)cc(C(C)(C)C)c1O	[283.07, 78.92, 283.23, 284.07, 210.98]
M289T476_2	289.055	7.94	C12H10F4N2O2	18.2	3-[4-Fluoro-3-(trifluoromethyl)phenyl]-5,5-dimethyl-hydantoin	[M-H]-	0.765	129851	70842-04-5	Alkaloids			CC1(C)NC(=O)N(c2ccc(F)c(C(F)(F)F)c2)C1=O	[289.05, 215.13, 197.12, 245.06, 289.17]
M289T244_2	289.166	4.06	C20H22N2	18.1	LE 300	[M-H]-	0.9664	4350931	274694-98-3	Alkaloids	Tryptophan alkaloids+Tyrosine alkaloids	Carboline alkaloids+Isoquinoline alkaloids	CN1CCc2ccccc2Cc2[nH]c3ccccc3c2CC1	[289.17, 115.04, 271.16, 129.06, 145.05]
M290T80	290.088	1.34	C11H17NO8	3.8	N-Fructosyl pyroglutamate	[M-H]-	0.9846	139292107					O=C(O)C1CCC(=O)N1CC1(O)OC(CO)C(O)C1O	[128.04, 200.06, 290.09, 170.05, 230.07]
M291T367	291.127	6.12	C16H20O5	12.9	Yuehgesin B	[M-H]-	0.725	23757203	155281-50-8	Shikimates and Phenylpropanoids	Coumarins	Simple coumarins	COc1ccc2ccc(=O)oc2c1CC(O)C(C)(C)OC	[96.96, 291.13, 291.06, 196.07, 211.1]
M292T291	292.123	4.85	C15H21Cl2NO5	13.3	Atpenin A5	[M-H-H2Cl2]-	0.9791	54676868	119509-24-9	Alkaloids+Polyketides			COc1[nH]c(=O)c(C(=O)[C@@H](C)C[C@H](C)[C@@H](Cl)CCl)c(O)c1OC	[292.12, 79.96, 106.98, 124.01, 80.97]
M296T105	296.081	1.75	C13H16ClN3O3	2.3	(E)-N'-(5-Chloro-2-hydroxybenzylidene)-2-morpholinoacetohydrazide	[M-H]-	0.9572	135842453	60947-32-2	Alkaloids			O=C(CN1CCOCC1)N/N=C/c1cc(Cl)ccc1O	[296.08, 124.01, 79.96, 106.98, 278.07]
M297T296_2	297.041	4.93	C19H17ClN2O4	9.7	Glafenin	[M-H-C3H6O2]-	0.9712	3474	3820-67-5	Alkaloids	Anthranilic acid alkaloids		O=C(OCC(O)CO)c1ccccc1Nc1ccnc2cc(Cl)ccc12	[297.04, 253.05, 97.03, 145.03, 269.05]
M297T286_2	297.098	4.76	C18H19NO4	7.3	Moupinamide	[M-H-CH3]-	0.7371	5280537	66648-43-9	Amino acids and Peptides+Shikimates and Phenylpropanoids	Phenylpropanoids (C6-C3)	Cinnamic acid amides	COc1cc(/C=C/C(=O)NCCc2ccc(O)cc2)ccc1O	[297.1, 239.0, 75.01, 159.05, 85.03]
M299T639_1	299.02	10.65	C25H20O10	0.6	2,3-Dehydrosilybin B	[M-H-C10H12O3]-	0.9814	12051803	142796-24-5	Shikimates and Phenylpropanoids	Lignans+Flavonoids	Flavonolignans+Flavonols	COc1cc([C@@H]2Oc3cc(-c4oc5cc(O)cc(O)c5c(=O)c4O)ccc3O[C@H]2CO)ccc1O	[299.02, 297.0, 271.03, 253.01, 255.03]
M299T365_2	299.02	6.09	C15H8O7	2.1	Emodic acid	[M-H]-	0.9196	361510	478-45-5	Polyketides	Polycyclic aromatic polyketides	Anthraquinones and anthrones	O=C(O)c1cc(O)c2c(c1)C(=O)c1cc(O)cc(O)c1C2=O	[299.02, 255.03, 183.05, 227.04, 226.03]
M300T254	300.051	4.24	C8H16NO9P	8.6	N-Acetyl-D-glucosamine 6-phosphate	[M-H]-	0.9321	150941	1746-32-3	Carbohydrates	Aminosugars and aminoglycosides	Aminosugars	CC(=O)N[C@@H](C=O)[C@@H](O)[C@H](O)[C@H](O)COP(=O)(O)O	[300.05, 270.04, 225.04, 184.04, 226.05]
M301T286	300.999	4.77	C14H6O8	1.5	Ellagic acid	[M-H]-	0.9988	5281855	476-66-4	Shikimates and Phenylpropanoids	Phenolic acids (C6-C1)	Gallotannins	O=c1oc2c(O)c(O)cc3c(=O)oc4c(O)c(O)cc1c4c23	[301.0, 229.01, 299.99, 284.0, 173.02]
M301T354	301.036	5.89	C15H10O7	0.5	Herbacetin	[M-H]-	0.7206	5280544	527-95-7	Shikimates and Phenylpropanoids	Flavonoids	Flavonols	O=c1c(O)c(-c2ccc(O)cc2)oc2c(O)c(O)cc(O)c12	[301.04, 229.05, 239.04, 186.03, 213.02]
M301T124	301.104	2.07	C17H19O3P	14.7	Diphenylphosphine acid	[M-H]-	0.7245	10380172	71140-70-0	Shikimates and Phenylpropanoids			O=C(O)CCCCP(=O)(c1ccccc1)c1ccccc1	[255.1, 301.1, 193.06, 151.05, 156.07]
M302T407	302.107	6.78	C15H17N3O4	12.8	Glutamine, N2-(indol-3-ylacetyl)-	[M-H]-	0.8979	7097452	3001-92-1	Amino acids and Peptides	Small peptides	Dipeptides	NC(=O)CC[C@H](NC(=O)Cc1c[nH]c2ccccc12)C(=O)O	[302.11, 302.61, 429.2, 257.96, 75.01]
M303T264_2	303.051	4.39	C15H12O7	1	Ganhuangemin	[M-H]-	0.9865	157633	80366-15-0	Shikimates and Phenylpropanoids	Flavonoids	Dihydroflavonols	O=C1c2c(O)cc(O)cc2O[C@H](c2c(O)cccc2O)[C@H]1O	[125.02, 303.05, 177.02, 149.02, 217.05]
M305T452	305.046	7.53	C16H9F3O3	8.4	7-Hydroxy-4-(3-trifluoromethylphenyl)coumarin	[M-H]-	0.9309	5708548	386704-09-2	Shikimates and Phenylpropanoids	Flavonoids	Neoflavonoids	O=c1cc(-c2cccc(C(F)(F)F)c2)c2ccc(O)cc2o1	[305.04, 260.05, 277.05, 205.07, 144.02]
M306T207_2	306.063	3.45	C12H9N3O5S	22.2	Nitazoxanide	[M-H]-	0.7601	41684	55981-09-4	Alkaloids+Shikimates and Phenylpropanoids			CC(=O)Oc1ccccc1C(O)=Nc1ncc([N+](=O)[O-])s1	[306.06, 288.05, 278.07, 287.05, 160.03]
M306T198	306.102	3.31	C34H39NO8	12.2	BayCysLT2	[M-H-C19H22O2]-	0.7869	53394034	712313-33-2				O=C(O)c1ccc(OCCCc2ccc(OCCCCOc3ccccc3)cc2)c(C(=O)NC2CCCC(C(=O)O)C2)c1	[306.1, 124.01, 79.96, 307.04, 106.98]
M306T786	306.208	13.1	C18H29NO3	1	Dihydrocapsaicin	[M-H]-	0.96	107982	19408-84-5	Alkaloids	Pseudoalkaloids	Capsaicins and Capsaicinoids+Phenylalanine-derived alkaloids	COc1cc(CNC(=O)CCCCCCC(C)C)ccc1O	[306.21, 288.2, 136.11, 262.22, 125.1]
M307T454	306.992	7.56	C6H14O10P2	21.7	5-Pyrophosphomevalonate	[M-H]-	0.9395	22833574	1492-08-6				C[C@](O)(CCOP(=O)(O)OP(=O)(O)O)CC(=O)O	[306.99, 251.0, 227.04, 171.05, 199.04]
M307T437	307.025	7.28	C15H13ClN2O4S	20.3	6-[[2-(5-Chloro-2-methoxyanilino)-2-ketoethyl]thio]nicotinic acid	[M-H-CO2]-	0.8179	23605664	891042-48-1	Alkaloids	Anthranilic acid alkaloids		COc1ccc(Cl)cc1NC(=O)CSc1ccc(C(=O)O)cn1	[307.03, 235.04, 233.07, 263.08, 307.07]
M308T194	308.118	3.24	C14H19N3O5	24.3	Gln-Tyr	[M-H]-	0.9828		457662-02-1					[308.12, 79.96, 220.07, 124.01, 106.98]
M309T133	309.11	2.22	C14H18N2O6	1.5	gamma-Glutamyltyrosine	[M-H]-	0.9791	94340	7432-23-7	Amino acids and Peptides	Small peptides	Aminoacids	NC(CCC(O)=NC(Cc1ccc(O)cc1)C(=O)O)C(=O)O	[128.04, 180.07, 291.1, 309.11, 127.05]
M311T396	311.054	6.59	C14H11F3N2OS	22.9	XAV 939	[M-H]-	0.7614	135418940	284028-89-3	Alkaloids			O=c1[nH]c(-c2ccc(C(F)(F)F)cc2)nc2c1CSCC2	[311.05, 265.05, 243.07, 174.96, 146.96]
M311T134	311.135	2.24	C19H20O4	19.7	Nordentatin	[M-H]-	0.7881	5495613	17820-07-4	Shikimates and Phenylpropanoids	Coumarins	Pyranocoumarins+Simple coumarins	C=CC(C)(C)c1c2c(c(O)c3ccc(=O)oc13)C=CC(C)(C)O2	[311.12, 267.12, 147.08, 205.12, 59.01]
M311T767	311.223	12.79	C18H32O4	4.2	9(S)-HPODE	[M-H]-	0.9818	1928	29774-12-7	Fatty acids	Octadecanoids	Other Octadecanoids	CCCCCC=CC=CC(CCCCCCCC(=O)O)OO	[311.22, 293.21, 211.13, 249.22, 197.12]
M313T638	313.036	10.63	C16H11ClN2O3	7.8	5-[(7-Chloro-4-quinolinyl)amino]-2-hydroxybenzoic acid	[M-H]-	0.9873	353545	114259-73-3	Alkaloids	Anthranilic acid alkaloids	Quinoline alkaloids	O=C(O)c1cc(Nc2ccnc3cc(Cl)ccc23)ccc1O	[269.05, 313.04, 116.93, 223.04, 254.02]
M313T679_1	313.072	11.32	C17H16O7	0.6	Isosulochrin	[M-H-H2O]-	0.8506	16681742	77282-68-9	Polyketides	Aromatic polyketides	Benzophenones	COC(=O)c1cc(OC)cc(O)c1C(=O)c1c(O)cc(C)cc1O	[267.03, 313.24, 313.08, 312.23, 239.03]
M315T220	315.051	3.67	C16H14O8	0.4	Cedrin	[M-H-H2O]-	0.8429	26087902	75513-81-4	Shikimates and Phenylpropanoids	Flavonoids	Dihydroflavonols	Cc1c(O)cc2c(c1O)C(=O)[C@@H](O)[C@H](c1cc(O)c(O)c(O)c1)O2	[315.05, 173.02, 213.06, 243.07, 145.03]
M315T152_1	315.072	2.53	C13H16O9	0	Gentisic acid 5-O-glucoside	[M-H]-	0.9229	10914066	1820-89-9	Shikimates and Phenylpropanoids	Phenolic acids (C6-C1)	Simple phenolic acids	O=C(O)c1cc(O[C@@H]2O[C@H](CO)[C@@H](O)[C@H](O)[C@H]2O)ccc1O	[315.07, 152.01, 108.02, 153.02, 109.03]
M317T479	317.013	7.99	C15H11ClN2O2S	9.6	4-[2-(3-Chloroanilino)-1,3-thiazol-4-yl]-1,2-benzenediol	[M-H]-	0.7547	962879	732260-12-7	Alkaloids			Oc1ccc(-c2csc(Nc3cccc(Cl)c3)n2)cc1O	[317.01, 80.97, 197.01, 237.06, 109.03]
M317T471	317.031	7.85	C15H11ClN2O4	9.5	2-[[(3-Chlorobenzoyl)amino]carbamoyl]benzoic acid	[M-H]-	0.8024	707802	304456-80-2	Alkaloids			O=C(NNC(=O)c1ccccc1C(=O)O)c1cccc(Cl)c1	[169.01, 197.01, 151.0, 317.03, 109.03]
M317T507_2	317.046	8.45	C14H8N2O6	13.1	Cinnabaric acid	[M+OH]-	0.8551	114918	606-59-7	Alkaloids	Anthranilic acid alkaloids	Phenoxazine alkaloids	Nc1c(C(=O)O)c2nc3c(C(=O)O)cccc3oc-2cc1=O	[317.05, 289.05, 245.06, 273.06, 169.03]
M317T248	317.067	4.14	C16H14O7	0.3	Cedeodarin	[M-H]-	0.8863	26195130	31076-39-8	Shikimates and Phenylpropanoids	Flavonoids	Dihydroflavonols	Cc1c(O)cc2c(c1O)C(=O)[C@@H](O)[C@H](c1ccc(O)c(O)c1)O2	[317.07, 187.04, 183.05, 299.06, 173.02]
M317T354	317.161	5.9	C13H26N4O3S	14.6	GLM(Amide)	[M-H]-	0.7051	4381663	4652-64-6	Amino acids and Peptides	Small peptides	Tripeptides	CSCCC(NC(=O)C(CC(C)C)NC(=O)CN)C(N)=O	[317.16, 225.11, 243.12, 207.1, 99.01]
M319T223	319.14	3.72	C14H24O8	1.1	Valproic acid glucuronide	[M-H]-	0.9018	88111	60113-83-9				CCCC(CCC)C(=O)O[C@@H]1O[C@H](C(=O)O)[C@@H](O)[C@H](O)[C@H]1O	[319.14, 101.02, 59.01, 71.01, 85.03]
M323T82	323.099	1.36	C12H22O11	0.3	Galactinol	[M-H-H2O]-	0.8393	439451	3687-64-7	Carbohydrates	Polyols	Cyclitols	OC[C@H]1O[C@H](OC2[C@H](O)[C@@H](O)C(O)[C@@H](O)[C@H]2O)[C@H](O)[C@@H](O)[C@H]1O	[161.05, 87.01, 323.1, 99.05, 113.02]
M325T768	325.051	12.79	C15H18N2O8S	2.9	3-[(Acetyloxy)methyl]-7-[(4-carboxybutanoyl)amino]-8-oxo-5-thia-1-azabicyclo[4.2.0]oct-2-ene-2-carboxylic acid	[M-H-C2H4O2]-	0.8785	3341657	1214202-11-5	Amino acids and Peptides	β-lactams	Cephalosporins	CC(=O)OCC1=C(C(=O)O)N2C(=O)C(NC(=O)CCCC(=O)O)C2SC1	[325.05, 325.18, 297.06, 183.01, 326.06]
M325T280	325.141	4.66	C20H24O5	11.5	5-Hydroxy-7-(4-hydroxy-3-methoxyphenyl)-1-(4-hydroxyphenyl)heptan-3-one	[M-H-H2O]-	0.7676	21588208	908094-05-3	Shikimates and Phenylpropanoids	Diarylheptanoids	Linear diarylheptanoids	COc1cc(CCC(O)CC(=O)CCc2ccc(O)cc2)ccc1O	[325.14, 221.13, 193.13, 151.05, 281.15]
M327T187	327.109	3.11	C15H20O8	0.7	3,4'-Dihydroxypropiophenone 3-glucoside	[M-H]-	0.9378	10471692	53170-92-6	Shikimates and Phenylpropanoids	Phenylethanoids (C6-C2)	Phenylethanoids	O=C(CCO[C@@H]1O[C@H](CO)[C@@H](O)[C@H](O)[C@H]1O)c1ccc(O)cc1	[147.05, 118.9, 59.01, 89.02, 116.91]
M328T219	328.104	3.66	C14H19NO8	0.1	Dopamine-4-O-glucuronide	[M-H]-	0.712	131705996	38632-24-5	Alkaloids	Tyrosine alkaloids	Phenylethylamines	NCCc1ccc(O[C@H]2O[C@H](C(=O)O)[C@@H](O)[C@H](O)[C@H]2O)c(O)c1	[328.11, 59.01, 89.02, 71.01, 101.02]
M329T395	329.07	6.58	C17H14O7	9.8	3-(1,2-Dihydroxypropyl)-1,6,8-trihydroxy-9,10-anthraquinone	[M-H]-	0.9394	45359290		Polyketides	Polycyclic aromatic polyketides	Anthraquinones and anthrones	CC(O)C(O)c1cc(O)c2c(c1)C(=O)c1cc(O)cc(O)c1C2=O	[329.07, 215.0, 205.12, 135.05, 79.96]
M329T270_2	329.14	4.5	C20H18N4O	5	PKI 166	[M-H]-	0.7193	6918403	187724-61-4	Alkaloids			C[C@@H](Nc1ncnc2[nH]c(-c3ccc(O)cc3)cc12)c1ccccc1	[329.14, 160.05, 175.08, 178.06, 241.05]
M331T295_2	331.119	4.92	C9H10O3	1.7	2-(3-Hydroxyphenyl)propionic acid	[2M-H]-	0.9946	12446853	56911-50-3				CC(C(=O)O)c1cccc(O)c1	[165.06, 121.07, 119.05, 106.04, 96.96]
M333T657	333.008	10.95	C15H10O7S	0.9	Daidzein 4'-sulfate	[M-H]-	0.9959	12114463	162935-26-4	Shikimates and Phenylpropanoids	Isoflavonoids	Isoflavones	O=c1c(-c2ccc(OS(=O)(=O)O)cc2)coc2cc(O)ccc12	[253.05, 225.06, 333.01, 333.21, 253.08]
M337T430_1	337.039	7.17	C24H20O12	11.8	6,7'-Dihydroxy-2,2'-dioxo-2H,2'H-[8,8'-bichromen]-7-yl hexopyranoside	[M-H-C6H10O5]-	0.7722	51136411		Shikimates and Phenylpropanoids	Coumarins	Simple coumarins	O=c1ccc2ccc(O)c(-c3c(OC4OC(CO)C(O)C(O)C4O)c(O)cc4ccc(=O)oc34)c2o1	[337.04, 257.08, 239.07, 227.07, 80.97]
M337T157	337.055	2.62	C17H15ClO8	18.9	Pestheic acid	[M-H-CO2]-	0.8427	9842980	165905-02-2	Polyketides	Diphenyl ethers (DPEs)	Fungal DPEs	COC(=O)c1cc(OC)c(Cl)c(O)c1Oc1cc(C)cc(O)c1C(=O)O	[337.05, 123.01, 322.03, 125.02, 113.02]
M341T217	341.088	3.61	C14H16N2O5S	19.6	Caspase-3/7 Inhibitor I	[M+OH]-	0.7936	2591	1110670-49-9	Alkaloids			COCC1CCCN1S(=O)(=O)c1ccc2c(c1)C(=O)C(=O)N2	[341.09, 113.02, 165.06, 121.07, 85.03]
M345T595	345.061	9.92	C17H15O6P	19.7	Ukanol RD	[M-H]-	0.8526	6454648	63562-33-4	Shikimates and Phenylpropanoids			O=C(O)CC(CP1(=O)Oc2ccccc2-c2ccccc21)C(=O)O	[301.05, 345.04, 273.06, 345.23, 299.02]
M345T217	345.109	3.61	C18H14N6O2	3.5	TG100-115	[M-H]-	0.8429	10427712	677297-51-7	Alkaloids	Histidine alkaloids	Imidazole alkaloids	Nc1nc(N)c2nc(-c3cccc(O)c3)c(-c3cccc(O)c3)nc2n1	[345.11, 167.06, 301.12, 193.08, 211.09]
M345T286_2	345.156	4.77	C12H22N6O6	9.5	Arg-Gly-Asp	[M-H]-	0.9591	3328704	99896-85-2	Amino acids and Peptides	Small peptides	Tripeptides	NC(N)=NCCCC(N)C(=O)NCC(=O)NC(CC(=O)O)C(=O)O	[345.16, 75.01, 85.03, 113.02, 71.01]
M347T651_1	347.056	10.85	C34H34O14S	9.7	BE 52440A	[M-H-C17H18O8]-	0.9104	9961688	195051-22-0	Polyketides	Naphthalenes	Naphthoquinones	COC(=O)CC1CC2(SC34CC(CC(=O)OC)OC(C)C3(O)C(=O)c3c(O)cccc3C4=O)C(=O)c3cccc(O)c3C(=O)C2(O)C(C)O1	[259.08, 303.07, 258.07, 101.04, 347.06]
M347T244	347.125	4.07	C21H17FN2O2	14.4	OC000459	[M-H]-	0.8297	11462174	851723-84-7	Alkaloids	Tryptophan alkaloids	Carboline alkaloids	Cc1c(Cc2ccc3ccccc3n2)c2cc(F)ccc2n1CC(=O)O	[347.12, 124.04, 347.17, 289.12, 317.11]
M347T656	347.187	10.93	C20H28O5	4.4	Gibberellin A14	[M-H]-	0.9888	443451	4955-22-0,429678-85-3	Terpenoids	Diterpenoids	Gibberellins	C=C1C[C@]23C[C@H]1CC[C@H]2[C@]1(C)CC[C@H](O)[C@@](C)(C(=O)O)[C@H]1[C@@H]3C(=O)O	[347.18, 303.2, 230.06, 259.08, 235.21]
M352T299	352.046	4.99	C17H18Cl3NO3	13.9	Celastramycin A	[M-H-HCl]-	0.9596	10157237	491600-94-3	Alkaloids	Proline alkaloids	Pyrrole alkaloids	CCCCCCc1cc(Cl)c(O)c(C(=O)c2c[nH]c(Cl)c2Cl)c1O	[352.05, 309.04, 282.04, 324.05, 335.02]
M355T1035	355.158	17.24	C21H24O5	9.5	3-Hydroxy-5-methoxy-2,2-dimethyl-7-phenethylchroman-8-carboxylic acid	[M-H]-	0.7845	24739240	946571-01-3	Shikimates and Phenylpropanoids	Stilbenoids	Monomeric stilbenes	COc1cc(CCc2ccccc2)c(C(=O)O)c2c1CC(O)C(C)(C)O2	[355.16, 116.93, 100.93, 84.94, 283.26]
M357T143	357.083	2.38	C17H20N6O4S	15.4	Bromosporine	[M-H-C2H6O]-	0.7712	72943187	1619994-69-2				CCOC(=O)Nc1cc(-c2ccc(C)c(NS(C)(=O)=O)c2)nn2c(C)nnc12	[357.08, 137.06, 113.02, 85.03, 175.02]
M359T279	359.135	4.64	C16H24O9	0.4	1-(.beta.-D-Glucopyranosyloxy)-7-methyl-1,4a,5,6,7,7a-hexahydrocyclopenta[c]pyran-4-carboxylic acid	[M-H]-	0.8984	23955871		Terpenoids	Monoterpenoids	Iridoids monoterpenoids	CC1CCC2C(C(=O)O)=COC(OC3OC(CO)C(O)C(O)C3O)C12	[359.15, 197.08, 135.08, 208.07, 153.09]
M359T221	359.15	3.68	C20H24O6	0.1	8-(4-Hydroxy-3-methoxyphenyl)-6,7-bis(hydroxymethyl)-3-methoxy-5,6,7,8-tetrahydronaphthalen-2-ol	[M-H]-	0.9437	4177125	6753-57-7	Shikimates and Phenylpropanoids	Lignans	Arylnaphthalene and aryltetralin lignans	COc1cc(C2c3cc(O)c(OC)cc3CC(CO)C2CO)ccc1O	[359.15, 344.13, 241.05, 109.03, 313.11]
M361T661	361.072	11.02	C10H22N2O8S2	7.1	POPSO	[M-H]-	0.8881	109211	68189-43-5				O=S(=O)(O)CC(O)CN1CCN(CC(O)CS(=O)(=O)O)CC1	[361.07, 288.04, 289.05, 245.06, 260.05]
M364T174	364.107	2.89	C17H19NO8	11	Dimethyl 4-hydroxy-4-methyl-2-(3-nitrophenyl)-6-oxo-1,3-cyclohexanedicarboxylate	[M-H]-	0.7273	2868846	142592-09-4				COC(=O)C1C(=O)CC(C)(O)C(C(=O)OC)C1c1cccc([N+](=O)[O-])c1	[364.11, 124.01, 79.96, 106.98, 236.06]
M371T230	371.098	3.83	C17H24O11	0.4	11-Methyloleoside	[M-H-CH4O]-	0.8267	10692563	60539-23-3	Terpenoids	Monoterpenoids	Secoiridoid monoterpenoids	C/C=C1/[C@H](O[C@@H]2O[C@H](CO)[C@@H](O)[C@H](O)[C@H]2O)OC=C(C(=O)OC)[C@H]1CC(=O)O	[371.1, 113.02, 136.05, 195.07, 151.08]
M371T299	371.15	4.98	C22H20N4O2	4.3	PPY A	[M-H]-	0.709	16750094	875634-01-8	Alkaloids	Nicotinic acid alkaloids	Pyridine alkaloids	COc1ccccc1-c1c[nH]c2ncc(-c3cncc(C(=O)N(C)C)c3)cc12	[341.1, 371.15, 356.13, 242.09, 285.11]
M373T610	373.072	10.17	C22H14O6	1.1	4,4'-Phthalidylidenedibenzoic acid	[M-H]-	0.9184	2832090	7535-16-2	Shikimates and Phenylpropanoids			O=C(O)c1ccc(C2(c3ccc(C(=O)O)cc3)OC(=O)c3ccccc32)cc1	[373.07, 328.04, 273.06, 300.04, 301.05]
M373T177	373.114	2.94	C16H22O10	0.9	Geniposidic acid	[M-H]-	0.9088	443354	27741-01-1	Terpenoids	Monoterpenoids	Iridoids monoterpenoids	O=C(O)C1=CO[C@@H](O[C@@H]2O[C@H](CO)[C@@H](O)[C@H](O)[C@H]2O)[C@@H]2C(CO)=CC[C@H]12	[373.11, 211.06, 195.03, 59.01, 89.02]
M373T688	373.133	11.47	C20H22O7	10	Diffractaic acid	[M-H]-	0.7255	94870	436-32-8	Polyketides	Aromatic polyketides	Depsides	COc1cc(C)c(C(=O)Oc2cc(C)c(C(=O)O)c(O)c2C)c(OC)c1C	[373.13, 293.18, 275.17, 231.18, 79.96]
M375T472	375.051	7.87	C21H12O7	1.1	6-Carboxyfluorescein	[M-H]-	0.8835	76806	3301-79-9	Shikimates and Phenylpropanoids			O=C(O)c1ccc2c(c1)C1(OC2=O)c2ccc(O)cc2Oc2cc(O)ccc21	[287.07, 375.05, 286.06, 331.06, 243.08]
M375T139	375.13	2.32	C16H24O10	0.2	Mussaenosidic acid	[M-H]-	0.8565	21633105	82451-22-7	Terpenoids	Monoterpenoids	Iridoids monoterpenoids	C[C@]1(O)CC[C@@H]2C(C(=O)O)=CO[C@@H](O[C@@H]3O[C@H](CO)[C@@H](O)[C@H](O)[C@H]3O)[C@@H]21	[375.13, 213.08, 195.07, 59.01, 89.02]
M377T293	377.161	4.88	C19H26N2O4S	17.5	Zinterol	[M-H]-	0.8926	37990	37000-20-7	Alkaloids	Tyrosine alkaloids	Phenylethylamines	CC(C)(Cc1ccccc1)NCC(O)c1ccc(O)c(NS(C)(=O)=O)c1	[377.16, 137.02, 362.14, 181.05, 195.07]
M377T264	377.182	4.4	C16H28O7	0.2	4-(Hydroxymethyl)-1-(propan-2-yl)cyclohex-3-en-1-yl .beta.-D-glucopyranoside	[M+FA-H]-	0.7058	56776282	359875-77-7	Terpenoids	Monoterpenoids	Menthane monoterpenoids+Monocyclic monoterpenoids	CC(C)C1(OC2OC(CO)C(O)C(O)C2O)CC=C(CO)CC1	[377.18, 329.14, 331.18, 377.05, 175.08]
M379T201	379.161	3.34	C16H28O10	0.5	2-Methylbut-3-en-2-yl 6-O-((2R,3R,4R)-3,4-dihydroxy-4-(hydroxymethyl)tetrahydrofuran-2-yl)-.beta.-D-glucopyranoside	[M-H]-	0.9306	11794150	76873-98-8	Terpenoids	Monoterpenoids	Acyclic monoterpenoids	C=CC(C)(C)O[C@@H]1O[C@H](CO[C@@H]2OC[C@](O)(CO)[C@H]2O)[C@@H](O)[C@H](O)[C@H]1O	[379.16, 101.02, 71.01, 247.12, 59.01]
M381T295	381.102	4.91	C17H22N2O4S2	18.4	N,N'-Di-p-tosyl-1,3-diaminopropane	[M-H]-	0.8537	3731938	53364-99-1	Alkaloids	Ornithine alkaloids	Polyamines	Cc1ccc(S(=O)(=O)NCCCNS(=O)(=O)c2ccc(C)cc2)cc1	[381.1, 301.15, 253.12, 271.13, 79.96]
M385T363	385.187	6.05	C19H30O8	1.7	(3E)-4-((1S)-1-Hydroxy-2,6,6-trimethyl-4-oxocyclohex-2-en-1-yl)but-3-en-2-yl .beta.-D-glucopyranoside	[M-H]-	0.9101	23757167	380861-18-7	Terpenoids	Apocarotenoids	Megastigmanes	CC1=CC(=O)CC(C)(C)[C@@]1(O)/C=C/C(C)O[C@@H]1O[C@H](CO)[C@@H](O)[C@H](O)[C@H]1O	[385.19, 85.03, 75.01, 113.02, 112.99]
M389T625	389.067	10.41	C16H19ClO9	6.5	Clofibric acid acyl-.beta.-D-glucuronide	[M-H]-	0.9405	155696	72072-47-0				CC(C)(Oc1ccc(Cl)cc1)C(=O)O[C@@H]1O[C@H](C(=O)O)[C@@H](O)[C@H](O)[C@H]1O	[389.07, 288.04, 213.02, 316.04, 272.05]
M389T630	389.124	10.5	C20H22O8	0.3	Resveratroloside	[M-H]-	0.8571	5322089	38963-95-0	Shikimates and Phenylpropanoids	Stilbenoids	Monomeric stilbenes	OC[C@H]1O[C@@H](Oc2ccc(/C=C/c3cc(O)cc(O)c3)cc2)[C@H](O)[C@@H](O)[C@@H]1O	[389.12, 330.11, 315.09, 374.1, 389.07]
M390T282	390.066	4.7	C19H18ClN3O5S	6.1	Rivaroxaban	[M-H-CO2]-	0.8287	9875401	366789-02-8	Alkaloids	Tryptophan alkaloids		O=C(NC[C@H]1CN(c2ccc(N3CCOCC3=O)cc2)C(=O)O1)c1ccc(Cl)s1	[390.07, 96.99, 69.0, 199.01, 244.04]
M391T203	391.161	3.38	C19H22F2N4O3	6	Sparfloxacin	[M-H]-	0.824	60464	110871-86-8	Alkaloids	Lysine alkaloids		C[C@H]1CN(c2c(F)c(N)c3c(=O)c(C(=O)O)cn(C4CC4)c3c2F)C[C@@H](C)N1	[391.16, 345.16, 89.02, 125.06, 161.05]
M397T260	397.187	4.34	C21H26N4O4	3.5	YA(Dstereo)F(Amide)	[M-H]-	0.942	78438543	80475-47-4	Amino acids and Peptides	Small peptides	Tripeptides	CC(NC(=O)C(N)Cc1ccc(O)cc1)C(=O)NC(Cc1ccccc1)C(N)=O	[397.19, 335.19, 379.18, 257.15, 273.19]
M399T284	399.166	4.74	C25H24N2O3	12.3	JWH 200 6-hydroxyindole metabolite	[M-H]-	0.9583	91701365	1427325-76-5				O=C(c1cccc2ccccc12)c1cn(CCN2CCOCC2)c2cc(O)ccc12	[399.17, 113.02, 75.01, 85.03, 165.09]
M402T664	402.07	11.07	C20H18ClNO6	10.8	Ochratoxin A	[M-H]-	0.8045	442530	303-47-9	Shikimates and Phenylpropanoids	Coumarins	Isocoumarins	C[C@@H]1Cc2c(Cl)cc(C(=O)N[C@@H](Cc3ccccc3)C(=O)O)c(O)c2C(=O)O1	[402.07, 329.04, 328.04, 245.06, 301.05]
M405T127	405.104	2.11	C24H30O14	0.8	(2S,3Z,4S)-4-(2-(2-(3,4-Dihydroxyphenyl)ethoxy)-2-oxoethyl)-2-(.beta.-D-glucopyranosyloxy)-3-(2-hydroxyethylidene)-3,4-dihydro-2H-pyran-5-carboxylic acid	[M-H-C8H8O2]-	0.9068	45359932		Terpenoids	Monoterpenoids	Secoiridoid monoterpenoids	O=C(C[C@@H]1C(C(=O)O)=CO[C@@H](O[C@@H]2O[C@H](CO)[C@@H](O)[C@H](O)[C@H]2O)/C1=C\CO)OCCc1ccc(O)c(O)c1	[405.1, 93.03, 195.07, 181.05, 137.02]
M405T283	405.119	4.71	C20H22O9	0.7	Astringin	[M-H]-	0.9964	5281712	29884-49-9	Shikimates and Phenylpropanoids	Stilbenoids	Monomeric stilbenes	OCC1OC(Oc2cc(O)cc(C=Cc3ccc(O)c(O)c3)c2)C(O)C(O)C1O	[243.07, 405.12, 137.02, 173.06, 242.06]
M410T163	410.154	2.72	C24H26ClN3O2S	7.4	HZ 52	[M-H-CO2]-	0.9856	25179909	1077626-51-7	Alkaloids	Nicotinic acid alkaloids	Pyridine alkaloids	CCCCCCC(Sc1nc(Cl)cc(Nc2ccc(-c3ccccc3)cc2)n1)C(=O)O	[410.15, 79.96, 124.01, 308.12, 392.14]
M413T682_1	413.067	11.36	C30H20O10	1.6	2,3 Dihydroamentoflavone	[M-H-C6H6O3]-	0.7797	16066857	34340-51-7	Shikimates and Phenylpropanoids	Flavonoids	Flavones	O=C1CC(c2ccc(O)c(-c3c(O)cc(O)c4c(=O)cc(-c5ccc(O)cc5)oc34)c2)Oc2cc(O)cc(O)c21	[413.07, 395.06, 145.03, 255.03, 369.08]
M419T71	419.096	1.18	C21H20O7	13.6	(5-Benzoyloxy-1,2,6-trihydroxycyclohex-3-en-1-yl)methyl benzoate	[M+Cl]-	0.714	14283260	1214814-81-9	Shikimates and Phenylpropanoids	Phenolic acids (C6-C1)	Simple phenolic acids	O=C(OCC1(O)C(O)C=CC(OC(=O)c2ccccc2)C1O)c1ccccc1	[419.1, 383.12, 341.11, 89.02, 257.04]
M419T276	419.171	4.6	C22H28O8	0.2	8-Methoxy-2,3-dimethylol-1-(3,4,5-trimethoxyphenyl)tetralin-6,7-diol	[M-H]-	0.8459	57509380	1379770-07-6	Shikimates and Phenylpropanoids	Lignans	Arylnaphthalene and aryltetralin lignans	COc1cc(C2c3c(cc(O)c(O)c3OC)CC(CO)C2CO)cc(OC)c1OC	[419.17, 359.11, 373.13, 404.15, 358.11]
M421T453_1	421.151	7.55	C21H28O10	1	Cichorioside B	[M-H-H2O]-	0.723	75528911	117037-78-2	Terpenoids	Sesquiterpenoids	Guaiane sesquiterpenoids	CC1=C2C(=O)C=C(CO[C@@H]3O[C@H](CO)[C@@H](O)[C@H](O)[C@H]3O)[C@@H]2[C@H]2OC(=O)[C@H](C)[C@@H]2[C@@H](O)C1	[421.15, 241.09, 243.1, 225.06, 226.06]
M429T432	429.083	7.19	C21H18O10	0.9	5-Hydroxy-4-oxo-2-phenyl-4H-chromen-7-yl .beta.-D-glucopyranosiduronic acid	[M-H]-	0.9872	14135335	35775-49-6	Shikimates and Phenylpropanoids	Flavonoids	Flavones	O=C(O)C1OC(Oc2cc(O)c3c(=O)cc(-c4ccccc4)oc3c2)C(O)C(O)C1O	[253.05, 113.02, 85.03, 175.03, 429.08]
M431T430	431.098	7.17	C21H20O10	0.5	w-O-beta-D-Glucopyranosylaloeemodin	[M-H]-	0.8822	53462441	50488-89-6	Polyketides	Polycyclic aromatic polyketides	Anthraquinones and anthrones	O=C1c2cccc(O)c2C(=O)c2c(O)cc(COC3OC(CO)C(O)C(O)C3O)cc21	[251.04, 431.1, 59.01, 89.02, 71.01]
M431T246	431.099	4.09	C21H20O10	0.3	Genistein sophoricoside	[M-H]-	0.9304	6078194		Shikimates and Phenylpropanoids	Isoflavonoids	Isoflavones	O=c1c(-c2ccc(OC3OC(CO)C(O)C(O)C3O)cc2)coc2cc(O)cc(O)c12	[431.1, 267.03, 268.04, 239.04, 238.03]
M431T373	431.099	6.22	C21H20O10	1.1	Oroxin a	[M-H]-	0.9929	5320313	57396-78-8	Shikimates and Phenylpropanoids	Flavonoids	Flavones	O=c1cc(-c2ccccc2)oc2cc(O[C@@H]3O[C@H](CO)[C@@H](O)[C@H](O)[C@H]3O)c(O)c(O)c12	[269.05, 251.04, 265.05, 431.1, 237.06]
M431T385	431.099	6.42	C21H20O10	1.2	Emodin 8-glucoside	[M-H]-	0.9965	99649	23313-21-5	Polyketides	Polycyclic aromatic polyketides	Anthraquinones and anthrones	Cc1cc(O)c2c(c1)C(=O)c1cc(O)cc(O[C@@H]3O[C@H](CO)[C@@H](O)[C@H](O)[C@H]3O)c1C2=O	[269.05, 431.1, 268.04, 240.04, 153.0]
M431T218	431.156	3.64	C19H28O11	0.3	Osmanthuside H	[M-H]-	0.9586	101845626	149155-70-4	Shikimates and Phenylpropanoids	Phenylethanoids (C6-C2)	Phenylethanoids	OC[C@@]1(O)CO[C@H](OC[C@H]2O[C@@H](OCCc3ccc(O)cc3)[C@H](O)[C@@H](O)[C@@H]2O)[C@@H]1O	[431.15, 89.02, 149.05, 59.01, 71.01]
M433T365	433.06	6.08	C18H22Cl2N2O4S	5.7	CAY10608	[M-H+2i]-	0.7118	11189693	457897-92-6	Shikimates and Phenylpropanoids			CS(=O)(=O)Nc1ccc(OC[C@@H](O)CNCCc2ccc(Cl)c(Cl)c2)cc1	[433.06, 153.0, 78.96, 433.24, 148.02]
M435T263	435.094	4.38	C20H20O11	0.7	2,3-Dihydroquercetin-3-O-xyloside	[M-H]-	0.894	24868443	40672-47-7	Shikimates and Phenylpropanoids	Flavonoids	Dihydroflavonols	O=C1c2c(O)cc(O)cc2OC(c2ccc(O)c(O)c2)C1OC1OCC(O)C(O)C1O	[151.0, 285.04, 435.1, 150.03, 435.22]
M435T225	435.151	3.74	C17H26O10	1	Loganin	[M+HCOO]-	0.9007	87691	18524-94-2	Terpenoids	Monoterpenoids	Iridoids monoterpenoids	COC(=O)C1=CO[C@@H](O[C@@H]2O[C@H](CO)[C@@H](O)[C@H](O)[C@H]2O)[C@H]2[C@@H]1C[C@H](O)[C@@H]2C	[227.09, 101.02, 127.04, 435.14, 153.0]
M441T294	441.123	4.9	C22H22N2O8	17.5	.alpha.-Apoterramycin	[M-H]-	0.9032	54696267	18695-01-7	Polyketides	Polycyclic aromatic polyketides	Tetracyclines	Cc1c2c(c(O)c3c(O)cccc13)C(=O)OC2C1[C@H](O)C(=O)C(C(N)=O)=C(O)[C@H]1N(C)C	[441.12, 361.17, 79.96, 165.06, 346.14]
M442T458	442.115	7.64	C22H24N2O9	0.8	Oxytetracycline	[M-H-NH3]-	0.7874		79-57-2					[442.11, 94.03, 158.04, 279.05, 185.02]
M447T449	447.072	7.49	C30H22O10	0.2	Diphysin	[M-H-C6H6O]-	0.8378	24150647	152246-61-2	Shikimates and Phenylpropanoids	Coumarins	Simple coumarins	O=C1Oc2cc(O)cc(O)c2[C@@H](c2ccc(O)cc2)[C@H]1[C@H]1C(=O)Oc2cc(O)cc(O)c2[C@H]1c1ccc(O)cc1	[447.07, 329.05, 328.04, 301.05, 59.01]
M447T277	447.094	4.62	C21H20O11	0.8	Luteolin-7-o-glucoside	[M-H]-	0.9845	5291488		Shikimates and Phenylpropanoids	Flavonoids	Flavones	O=c1cc(-c2ccc(O)c(O)c2)oc2cc(OC3OC(CO)C(O)C(O)C3O)cc(O)c12	[285.04, 447.09, 284.03, 256.04, 270.02]
M449T318	449.109	5.3	C21H22O11	1.4	Hovetrichoside C	[M-H]-	0.8277	10789705	210050-28-5	Shikimates and Phenylpropanoids	Flavonoids	Aurones	O=C1c2c(O[C@@H]3O[C@H](CO)[C@@H](O)[C@H](O)[C@H]3O)cc(O)cc2OC1(O)Cc1ccc(O)cc1	[125.02, 449.11, 269.05, 151.0, 57.03]
M449T367	449.146	6.11	C23H22N4O6	2.4	3-(3,4-Dihydroxy-1-keto-2,2-dimethyl-3aH-imidaz[1,2-a]indol-4-yl)-2-(4-ketoquinazolin-3-yl)propionic acid	[M-H]-	0.7644	45782772	1214809-50-3	Alkaloids	Anthranilic acid alkaloids	Quinazoline alkaloids	CC1(C)C(=O)N2c3ccccc3C(O)(CC(C(=O)O)n3cnc4ccccc4c3=O)C2N1O	[449.15, 286.08, 242.1, 225.09, 171.05]
M451T195	451.136	3.25	C25H24O8	8.6	3-(3,4-Dihydroxyphenyl)-2-[(2,2-dimethylchromen-6-yl)methyl]-5-keto-4-methoxyfuran-2-carboxylic acid methyl ester	[M-H]-	0.8148	45359229	1083193-38-7	Shikimates and Phenylpropanoids	Lignans	Neolignans	COC(=O)C1(Cc2ccc3c(c2)C=CC(C)(C)O3)OC(=O)C(OC)=C1c1ccc(O)c(O)c1	[451.14, 173.07, 132.03, 88.04, 115.0]
M451T488	451.25	8.14	C28H36O5	2.7	(2R,4aS,6aR,6aS,14aS,14bR)-10,11-Dihydroxy-2,4a,6a,6a,14a-pentamethyl-8-oxo-1,3,4,5,6,13,14,14b-octahydropicene-2-carboxylic acid	[M-H]-	0.9936	23757062	118172-80-8	Terpenoids	Triterpenoids		CC1(C(=O)O)CCC2(C)CCC3(C)C4=CC(=O)c5cc(O)c(O)cc5C4(C)CCC3(C)C2C1	[451.25, 451.08, 50.14, 173.02, 343.19]
M457T865_2	457.072	14.42	C22H18O11	12.8	Epigallocatechin gallate	[M-H]-	0.9658	65064	989-51-5	Shikimates and Phenylpropanoids	Flavonoids	Flavan-3-ols	O=C(O[C@@H]1Cc2c(O)cc(O)cc2O[C@@H]1c1cc(O)c(O)c(O)c1)c1cc(O)c(O)c(O)c1	[457.07, 413.08, 384.08, 369.09, 50.79]
M461T383	461.073	6.39	C21H18O12	1.6	Luteolin 7-glucuronide	[M-H]-	0.9942	5280601	29741-10-4	Shikimates and Phenylpropanoids	Flavonoids	Flavones	O=C(O)C1OC(Oc2cc(O)c3c(=O)cc(-c4ccc(O)c(O)c4)oc3c2)C(O)C(O)C1O	[285.04, 213.06, 461.07, 257.05, 286.04]
M461T382_2	461.109	6.36	C22H22O11	0.1	Diosmetin 7-O-beta-D-glucopyranoside	[M-H]-	0.9778	11016019	20126-59-4	Shikimates and Phenylpropanoids	Flavonoids	Flavones	COc1ccc(-c2cc(=O)c3c(O)cc(O[C@@H]4O[C@H](CO)[C@@H](O)[C@H](O)[C@H]4O)cc3o2)cc1O	[299.06, 284.03, 461.24, 165.99, 110.0]
M463T286	463.088	4.77	C21H21O12	3.3	Delphinidin 3-galactoside	[M-2H]-	0.9473	13915667		Shikimates and Phenylpropanoids	Flavonoids	Anthocyanidins	OCC1OC(Oc2cc3c(O)cc(O)cc3[o+]c2-c2cc(O)c(O)c(O)c2)C(O)C(O)C1O	[463.09, 300.03, 239.04, 283.02, 282.02]
M463T216_2	463.089	3.6	C25H28O16	0.4	Neomangiferin	[M-H-C4H8O4]-	0.8684	6918448	64809-67-2	Shikimates and Phenylpropanoids	Xanthones	Plant xanthones	O=c1c2cc(O[C@@H]3O[C@H](CO)[C@@H](O)[C@H](O)[C@H]3O)c(O)cc2oc2cc(O)c([C@@H]3O[C@H](CO)[C@@H](O)[C@H](O)[C@H]3O)c(O)c12	[463.09, 301.04, 151.0, 125.02, 283.02]
M463T351	463.125	5.85	C22H24O11	2.6	Protogenkwanin 4'-glucoside	[M-H]-	0.7762	13965750	78983-46-7	Polyketides			COc1cc(O)c2c(=O)cc(C3(O)C=CC(O[C@@H]4O[C@H](CO)[C@@H](O)[C@H](O)[C@H]4O)C=C3)oc2c1	[139.04, 161.02, 463.12, 301.07, 124.02]
M463T381	463.255	6.36	C28H36N2O4	10.7	Psychotrine	[M-H]-	0.9524	3496498	7633-29-6	Alkaloids	Tyrosine alkaloids	Isoquinoline alkaloids	CCC1CN2CCc3cc(OC)c(OC)cc3C2CC1CC1=NCCc2cc(O)c(OC)cc21	[463.25, 301.2, 59.01, 89.02, 101.02]
M465T225	465.104	3.76	C21H22O12	0.5	2-Hydroxy-5-((2S,3S)-3,5,7-trihydroxy-4-oxo-3,4-dihydro-2H-chromen-2-yl)phenyl .beta.-D-glucopyranoside	[M-H]-	0.7069	38359194		Shikimates and Phenylpropanoids	Flavonoids	Dihydroflavonols	O=C1c2c(O)cc(O)cc2O[C@@H](c2ccc(O)c(O[C@@H]3O[C@H](CO)[C@@H](O)[C@H](O)[C@H]3O)c2)[C@@H]1O	[465.1, 125.02, 177.02, 285.04, 149.02]
M465T406	465.271	6.77	C25H34N6O3	19	Acetildenafil	[M-H]-	0.9405	135566112	831217-01-7	Alkaloids	Pseudoalkaloids		CCCc1nn(C)c2c(=O)[nH]c(-c3cc(C(=O)CN4CCN(CC)CC4)ccc3OCC)nc12	[465.27, 303.22, 59.01, 89.02, 101.02]
M465T921	465.304	15.35	C27H46O4S	0.6	Cholesteryl sulfate	[M-H]-	0.9975	65076	1256-86-6	Terpenoids	Steroids	Cholestane steroids	CC(C)CCC[C@@H](C)[C@H]1CC[C@H]2[C@@H]3CC=C4C[C@@H](OS(=O)(=O)O)CC[C@]4(C)[C@H]3CC[C@@]21C	[465.3, 96.96, 51.7, 466.31, 98.96]
M471T815	471.348	13.59	C30H48O4	0.7	Maslinic acid	[M-H]-	0.9953	3694932		Terpenoids	Triterpenoids	Oleanane triterpenoids	CC1(C)CCC2(C(=O)O)CCC3(C)C(=CCC4C5(C)CC(O)C(O)C(C)(C)C5CCC43C)C2C1	[471.35, 409.35, 407.33, 52.37, 471.08]
M473T648_1	473.067	10.8	C22H18O12	11.5	Chicoric acid	[M-H]-	0.7662	5281764	6537-80-0	Shikimates and Phenylpropanoids	Phenylpropanoids (C6-C3)	Cinnamic acids and derivatives	O=C(/C=C/c1ccc(O)c(O)c1)O[C@@H](C(=O)O)[C@@H](OC(=O)/C=C/c1ccc(O)c(O)c1)C(=O)O	[473.07, 173.02, 145.03, 297.06, 401.08]
M473T499	473.109	8.32	C22H24BrFN4O2	20.5	Vandetanib	[M-H]-	0.7809	3081361	443913-73-3	Alkaloids			COc1cc2c(Nc3ccc(Br)cc3F)ncnc2cc1OCC1CCN(C)CC1	[473.11, 268.04, 240.04, 269.05, 239.04]
M475T391	475.089	6.52	C22H20O12	0.7	6-O-Methylscutellarin	[M-H]-	0.8857	5318059	31105-76-7	Shikimates and Phenylpropanoids	Flavonoids	Flavones	COc1c(OC2OC(C(=O)O)C(O)C(O)C2O)cc2oc(-c3ccc(O)cc3)cc(=O)c2c1O	[284.03, 299.06, 113.02, 475.09, 71.01]
M475T192	475.146	3.21	C20H28O13	1	Physanguloside A	[M-H]-	0.7715	57509350	2089006-32-4				COC(=O)c1ccccc1OC1OC(CO)C(O)C(O)C1OC1OC(CO)C(O)C(O)C1O	[475.14, 221.07, 101.02, 71.01, 89.02]
M491T794	491.078	13.24	C22H20O13	10.8	6-{[5,7-dihydroxy-2-(4-hydroxy-3-methoxyphenyl)-4-oxo-4H-chromen-3-yl]oxy}-3,4,5-trihydroxyoxane-2-carboxylic acid	[M-H]-	0.9231	45782983		Shikimates and Phenylpropanoids	Flavonoids	Flavonols	COc1cc(-c2oc3cc(O)cc(O)c3c(=O)c2OC2OC(C(=O)O)C(O)C(O)C2O)ccc1O	[315.07, 358.05, 491.1, 287.07, 314.06]
M493T245	493.172	4.08	C25H30O13	0.7	6'-O-E-Caffeoylmussaenosidic acid	[M-H-CO2]-	0.8734	23844050	1136483-55-0	Terpenoids	Monoterpenoids	Iridoids monoterpenoids	C[C@]1(O)CC[C@@H]2C(C(=O)O)=CO[C@@H](O[C@@H]3O[C@H](COC(=O)/C=C/c4ccc(O)c(O)c4)[C@@H](O)[C@H](O)[C@H]3O)[C@@H]21	[493.17, 317.14, 113.02, 85.03, 175.02]
M496T636	496.275	10.6	C49H74N10O12	15.6	Akerstox	[M-2H]2-	0.9382	445434	101043-37-2	Amino acids and Peptides	Oligopeptides	Cyclic peptides+Microcystins	C=C1C(=O)N[C@H](C)C(=O)N[C@@H](CC(C)C)C(=O)N[C@@H](C(=O)O)[C@H](C)C(=O)N[C@@H](CCCN=C(N)N)C(=O)N[C@@H](/C=C/C(C)=C/[C@H](C)[C@H](Cc2ccccc2)OC)[C@H](C)C(=O)N[C@@H](C(=O)O)CCC(=O)N1C	[496.27, 55.14, 497.28, 79.96, 106.98]
M497T152	497.144	2.53	C26H28O11	3.5	2-(3,4-Dihydroxyphenyl)ethyl 4-(2-(2-(3,4-dihydroxyphenyl)ethoxy)-2-oxoethyl)-5-hydroxy-4a,5,7,7a-tetrahydro-4H-furo[3,4-b]pyran-3-carboxylate	[M-H-H2O]-	0.9616	75528835		Terpenoids	Monoterpenoids	Secoiridoid monoterpenoids	O=C(CC1C(C(=O)OCCc2ccc(O)c(O)c2)=COC2COC(O)C21)OCCc1ccc(O)c(O)c1	[497.14, 153.06, 89.02, 101.02, 59.01]
M501T817	501.323	13.62	C30H46O6	1.7	3,19-Dihydroxyurs-12-ene-23,28-dioic acid	[M-H]-	0.9601	13857524		Terpenoids	Triterpenoids	Ursane and Taraxastane triterpenoids	CC1CCC2(C(=O)O)CCC3(C)C(=CCC4C5(C)CCC(O)C(C)(C(=O)O)C5CCC43C)C2C1(C)O	[501.32, 501.1, 457.33, 439.32, 325.05]
M505T342	505.099	5.71	C24H22O15	1.2	6''-O-Malonylisoquercitrin	[M-H-CO2]-	0.8481	5282159	96862-01-0	Shikimates and Phenylpropanoids	Flavonoids	Flavonols	O=C(O)CC(=O)OC[C@H]1O[C@@H](Oc2c(-c3ccc(O)c(O)c3)oc3cc(O)cc(O)c3c2=O)[C@H](O)[C@@H](O)[C@@H]1O	[505.1, 299.02, 283.02, 300.03, 271.03]
M507T224	507.208	3.73	C21H34O11	0.1	6-O-Pentopyranosyl-1-O-((2,6,6-trimethylcyclohex-1-en-1-yl)carbonyl)hexopyranose	[M+HCOO]-	0.8542	45783035		Terpenoids	Monoterpenoids	Secoiridoid monoterpenoids	CC1=C(C(=O)OC2OC(COC3OCC(O)C(O)C3O)C(O)C(O)C2O)C(C)(C)CCC1	[507.21, 101.02, 71.01, 345.16, 113.02]
M519T295	519.188	4.92	C26H32O11	1.4	Symplocosin	[M-H]-	0.8341	129316934	69251-96-3	Shikimates and Phenylpropanoids	Lignans	Furofuranoid lignans	COc1cc(C2OCC3C(c4ccc(OC5OC(CO)C(O)C(O)C5O)c(OC)c4)OCC23)ccc1O	[357.13, 151.04, 89.02, 136.02, 59.01]
M521T855	521.312	14.25	C29H46O8	1.4	4-[[8a-(Hydroxymethyl)-5-[5-hydroxy-3-[[(Z)-2-methylbut-2-enoyl]oxymethyl]pentyl]-5,6-dimethyl-3,4,4a,6,7,8-hexahydronaphthalen-1-yl]methoxy]-4-oxobutanoic acid	[M-H]-	0.7895	71694449		Terpenoids	Diterpenoids	Colensane and Clerodane diterpenoids	C/C=C(/C)C(=O)OCC(CCO)CCC1(C)C(C)CCC2(CO)C(COC(=O)CCC(=O)O)=CCCC21	[521.31, 175.04, 447.28, 133.03, 429.27]
M527T300	527.073	4.99	C30H23BrO4	7.9	Bromadiolone	[M-H+2i]-	0.8253	54680085	28772-56-7	Shikimates and Phenylpropanoids	Coumarins	Simple coumarins	O=c1oc2ccccc2c(O)c1C(CC(O)c1ccc(-c2ccc(Br)cc2)cc1)c1ccccc1	[527.07, 447.12, 113.02, 271.08, 193.04]
M535T271	535.182	4.52	C40H68N2O31	2	Lacto-N-hexaose	[M-2H]2-	0.8773		64003-51-6					[535.18, 193.05, 178.03, 177.06, 123.05]
M537T637_1	537.084	10.62	C30H18O10	0.8	Hinokiflavone	[M-H]-	0.8405	5281627	19202-36-9	Shikimates and Phenylpropanoids	Flavonoids	Flavones	O=c1cc(-c2ccc(Oc3c(O)cc4oc(-c5ccc(O)cc5)cc(=O)c4c3O)cc2)oc2cc(O)cc(O)c12	[537.08, 245.01, 391.05, 217.01, 373.04]
M537T655	537.12	10.92	C24H26O14	9.9	Sibiricaxanthone B	[M-H]-	0.9345	73804949	241125-81-5	Shikimates and Phenylpropanoids	Xanthones	Plant xanthones	O=c1c2cc(O)ccc2oc2cc(O)c([C@@H]3O[C@H](CO)[C@@H](O)[C@H](O)[C@H]3O[C@@H]3OC[C@](O)(CO)[C@H]3O)c(O)c12	[537.12, 417.08, 389.08, 493.13, 374.1]
M541T354	541.267	5.9	C50H84O25	17.6	Capsianoside II	[M-2H]2-	0.7278	23900064	121961-80-6	Terpenoids	Sesquiterpenoids	Farnesane sesquiterpenoids	C=CC(C)(CC/C=C(\C)CC/C=C(\C)CC/C=C(\C)CO[C@@H]1O[C@@H](C)[C@H](O)[C@@H](O[C@@H]2O[C@H](CO[C@@H]3O[C@@H](C)[C@H](O)[C@@H](O)[C@H]3O)[C@@H](O)[C@H](O)[C@H]2O)[C@H]1O)O[C@@H]1O[C@H](CO)[C@@H](O)[C@H](O)[C@H]1O[C@@H]1O[C@H](CO)[C@@H](O)[C@H](O)[C@H]1O	[541.27, 88.04, 279.14, 101.07, 190.09]
M543T243	543.136	4.05	C30H24O10	11.4	5,7-Dihydroxy-2-(4-hydroxyphenyl)-3-[3,5,7-trihydroxy-2-(4-hydroxyphenyl)chroman-8-yl]chroman-4-one	[M-H]-	0.7844	45360286	1212344-22-3	Shikimates and Phenylpropanoids	Flavonoids	Flavanones	O=C1c2c(O)cc(O)cc2OC(c2ccc(O)cc2)C1c1c(O)cc(O)c2c1OC(c1ccc(O)cc1)C(O)C2	[543.14, 218.02, 174.03, 200.01, 175.04]
M555T478	555.297	7.97	C16H22O4	1.5	.alpha.-CEHC	[2M-H]-	0.8912	12073949	4072-32-6	Terpenoids	Meroterpenoids	Prenyl quinone meroterpenoids	Cc1c(C)c2c(c(C)c1O)CC[C@@](C)(CCC(=O)O)O2	[555.3, 493.3, 511.31, 61.7, 433.28]
M563T241	563.141	4.02	C26H28O14	0.7	Isoschaftoside	[M-H]-	0.9936	3084995	52012-29-0	Shikimates and Phenylpropanoids	Flavonoids	Flavones	O=c1cc(-c2ccc(O)cc2)oc2c([C@@H]3O[C@H](CO)[C@@H](O)[C@H](O)[C@H]3O)c(O)c([C@@H]3OC[C@H](O)[C@H](O)[C@@H]3O)c(O)c12	[563.14, 353.07, 383.08, 297.08, 173.05]
M573T484	573.162	8.07	C28H30O13	1.2	3'-O-Desmethyletoposide	[M-H]-	0.9121	127462	100007-54-3	Shikimates and Phenylpropanoids	Lignans	Arylnaphthalene and aryltetralin lignans	COc1cc([C@@H]2c3cc4c(cc3[C@@H](O[C@@H]3O[C@@H]5CO[C@@H](C)O[C@H]5[C@H](O)[C@H]3O)[C@H]3COC(=O)[C@H]23)OCO4)cc(O)c1O	[573.16, 319.06, 303.07, 334.09, 349.11]
M579T276	579.116	4.6	C33H24O10	22.4	Sciadopitysin	[M-H]-	0.7581	5281696	521-34-6	Shikimates and Phenylpropanoids	Flavonoids	Flavones	COc1ccc(-c2cc(=O)c3c(O)cc(O)c(-c4cc(-c5cc(=O)c6c(O)cc(OC)cc6o5)ccc4OC)c3o2)cc1	[579.12, 323.13, 403.08, 109.02, 569.74]
M593T289	593.152	4.82	C27H31O15	1	Pelargonidin-3,5-di-beta-d-glucoside	[M-2H]-	0.7339	4999763		Shikimates and Phenylpropanoids	Flavonoids	Anthocyanidins	OCC1OC(Oc2cc3c(OC4OC(CO)C(O)C(O)C4O)cc(O)cc3[o+]c2-c2ccc(O)cc2)C(O)C(O)C1O	[431.1, 268.04, 593.15, 240.04, 281.05]
M609T289	609.147	4.82	C27H31O16	2.2	Cyanin cation	[M-2H]-	0.8526	441688	20905-74-2	Shikimates and Phenylpropanoids	Flavonoids	Anthocyanidins	OC[C@H]1O[C@@H](Oc2cc3c(O[C@@H]4O[C@H](CO)[C@@H](O)[C@H](O)[C@H]4O)cc(O)cc3[o+]c2-c2ccc(O)c(O)c2)[C@H](O)[C@@H](O)[C@@H]1O	[609.15, 447.09, 284.03, 255.03, 285.04]
M609T275	609.147	4.59	C27H30O16	1.2	Rutin	[M-H]-	0.9605	5280805	153-18-4	Shikimates and Phenylpropanoids	Flavonoids	Flavonols	C[C@@H]1O[C@@H](OC[C@H]2O[C@@H](Oc3c(-c4ccc(O)c(O)c4)oc4cc(O)cc(O)c4c3=O)[C@H](O)[C@@H](O)[C@@H]2O)[C@@H](O)[C@@H](O)[C@H]1O	[609.15, 300.03, 271.03, 301.04, 255.03]
M621T354	621.111	5.9	C27H26O17	3.2	Q63398889	[M-H]-	0.9332	102152390		Shikimates and Phenylpropanoids	Flavonoids	Flavones	O=C(O)[C@H]1O[C@@H](Oc2ccc(-c3cc(=O)c4c(O)cc(O[C@@H]5O[C@H](C(=O)O)[C@@H](O)[C@H](O)[C@H]5O)cc4o3)cc2)[C@H](O)[C@@H](O)[C@@H]1O	[269.05, 445.08, 270.05, 255.03, 113.02]
M635T390	635.105	6.49	C27H24O18	24.9	1,2,3-Tris-O-(3,4,5-trihydroxybenzoyl)-.beta.-D-glucopyranose	[M-H]-	0.8241	5322038	84415-91-8	Shikimates and Phenylpropanoids	Phenolic acids (C6-C1)	Gallotannins	O=C(OC1OC(CO)C(O)C(OC(=O)c2cc(O)c(O)c(O)c2)C1OC(=O)c1cc(O)c(O)c(O)c1)c1cc(O)c(O)c(O)c1	[635.1, 223.04, 311.06, 268.04, 367.06]
M638T785	638.332	13.08	C29H54NO12P	3.4	Hexosyl lpe 18:2	[M-H]-	0.8842	139291879		Fatty acids	Glycerophospholipids	Glycerophosphoethanolamines	CCCCC/C=C/C/C=C/CCCCCCCC(=O)OC(CO)COP(=O)(O)OCCNC1OC(CO)C(O)C(O)C1O	[279.23, 638.33, 476.28, 153.0, 196.04]
M641T164	641.137	2.74	C27H30O18	1	Myricetin 3,3'-digalactoside	[M-H]-	0.7937	14159396	28454-81-1	Shikimates and Phenylpropanoids	Flavonoids	Flavonols	O=c1c(OC2OC(CO)C(O)C(O)C2O)c(-c2cc(O)c(O)c(OC3OC(CO)C(O)C(O)C3O)c2)oc2cc(O)cc(O)c12	[641.14, 271.02, 315.01, 297.0, 155.05]
M653T80	653.156	1.34	C29H35O17	24.8	Malvin	[Cat-2H]-	0.7428	441765	47863-30-9	Shikimates and Phenylpropanoids	Flavonoids	Anthocyanidins	COc1cc(-c2[o+]c3cc(O)cc(O[C@@H]4O[C@H](CO)[C@@H](O)[C@H](O)[C@H]4O)c3cc2O[C@@H]2O[C@H](CO)[C@@H](O)[C@H](O)[C@H]2O)cc(OC)c1O	[653.16, 348.09, 143.05, 128.04, 306.08]
M677T803	677.376	13.38	C33H58O14	1	Gingerglycolipid B	[M-H]-	0.9185	10009754	88168-90-5	Fatty acids	Glycerolipids	Glycosylmonoacylglycerols	CCCCC/C=C\C/C=C\CCCCCCCC(=O)OC[C@@H](O)CO[C@@H]1O[C@H](CO[C@H]2O[C@H](CO)[C@H](O)[C@H](O)[C@H]2O)[C@H](O)[C@H](O)[C@H]1O	[279.23, 397.14, 415.15, 101.02, 89.02]
M685T232	685.271	3.86	C32H46O16	0	Secoisolariciresinol 9,9'-diglucoside	[M-H]-	0.8602	74328989	148244-82-0	Shikimates and Phenylpropanoids	Lignans	Arylnaphthalene and aryltetralin lignans+Dibenzylbutane lignans	COc1cc(CC(COC2OC(CO)C(O)C(O)C2O)C(COC2OC(CO)C(O)C(O)C2O)Cc2ccc(O)c(OC)c2)ccc1O	[685.27, 361.17, 165.06, 314.06, 101.02]
M731T201	731.277	3.34	C32H46O16	0.5	Secoisolariciresinol diglucoside	[M+FA-H]-	0.9382	74328989		Shikimates and Phenylpropanoids	Lignans	Arylnaphthalene and aryltetralin lignans+Dibenzylbutane lignans	COc1cc(CC(COC2OC(CO)C(O)C(O)C2O)C(COC2OC(CO)C(O)C(O)C2O)Cc2ccc(O)c(OC)c2)ccc1O	[361.17, 523.22, 165.06, 346.14, 122.04]
