# Supplementary material for: Neuroprotective effects of ethanol extraction from Rubia yunnanensis Diels on chronic cerebral hypoperfusion: modulation of the System Xc-/GSH/GPX4 axis to alleviate oxidative stress and ferroptosis
Source: Front Pharmacol. 2025 Feb 25;16:1552228. doi: 10.3389/fphar.2025.1552228 (PMC11893507; doi:10.3389/fphar.2025.1552228)
Supplement: Supplementary file 6 [file Table5.XLSX]

## Sheet: Sheet1
KEGG_level_1	KEGG_level_2	KEGG_map	Description	DiffRatio	BgRatio	P-value	Adjusted P-value	All_index	All_GeneName	Count_all	Up_index	Up_GeneName	Count_up	Down_index	Down_GeneName	Count_down	Hyperlink
Environmental Information Processing	Signal transduction	rno04020	Calcium signaling pathway	3/16 18.75%	238/9007 2.64%	0.00790815	0.342755	ENSRNOG00000012609;ENSRNOG00000020557;ENSRNOG00000046468	Trdn;Ryr1;Ptgfr	3	ENSRNOG00000012609;ENSRNOG00000020557;ENSRNOG00000046468	Trdn;Ryr1;Ptgfr	3	--	--	0	https://www.genome.jp/dbget-bin/www_bget?rno04020
Environmental Information Processing	Signal transduction	rno04350	TGF-beta signaling pathway	2/16 12.5%	96/9007 1.07%	0.0122412	0.342755	ENSRNOG00000053753;ENSRNOG00000010917	Thsd4;Bmp5	2	ENSRNOG00000053753;ENSRNOG00000010917	Thsd4;Bmp5	2	--	--	0	https://www.genome.jp/dbget-bin/www_bget?rno04350
Metabolism	Metabolism of cofactors and vitamins	rno00670	One carbon pool by folate	1/16 6.25%	18/9007 0.2%	0.0315262	0.370081	ENSRNOG00000001261	Ftcd	1	--	--	0	ENSRNOG00000001261	Ftcd	1	https://www.genome.jp/dbget-bin/www_bget?rno00670
Metabolism	Metabolism of other amino acids	rno00430	Taurine and hypotaurine metabolism	1/16 6.25%	22/9007 0.24%	0.0384043	0.370081	ENSRNOG00000003620	Fmo3	1	ENSRNOG00000003620	Fmo3	1	--	--	0	https://www.genome.jp/dbget-bin/www_bget?rno00430
Metabolism	Amino acid metabolism	rno00340	Histidine metabolism	1/16 6.25%	25/9007 0.28%	0.0435328	0.370081	ENSRNOG00000001261	Ftcd	1	--	--	0	ENSRNOG00000001261	Ftcd	1	https://www.genome.jp/dbget-bin/www_bget?rno00340
Cellular Processes	Cell growth and death	rno04216	Ferroptosis	1/16 6.25%	42/9007 0.47%	0.0441133	0.370081	ENSRNOG00000009434	Inhca	1	ENSRNOG00000009434	Inhca	1	--	--	0	https://www.genome.jp/dbget-bin/www_bget?rno04216
Organismal Systems	Digestive system	rno04978	Mineral absorption	1/16 6.25%	57/9007 0.63%	0.0966645	0.370081	ENSRNOG00000009434	Inhca	1	ENSRNOG00000009434	Inhca	1	--	--	0	https://www.genome.jp/dbget-bin/www_bget?rno04978
Human Diseases	Immune disease	rno05332	Graft-versus-host disease	1/16 6.25%	61/9007 0.68%	0.103108	0.370081	ENSRNOG00000065254	RT1-CE16	1	--	--	0	ENSRNOG00000065254	RT1-CE16	1	https://www.genome.jp/dbget-bin/www_bget?rno05332
Organismal Systems	Nervous system	rno04730	Long-term depression	1/16 6.25%	61/9007 0.68%	0.103108	0.370081	ENSRNOG00000020557	Ryr1	1	ENSRNOG00000020557	Ryr1	1	--	--	0	https://www.genome.jp/dbget-bin/www_bget?rno04730
Human Diseases	Immune disease	rno05330	Allograft rejection	1/16 6.25%	62/9007 0.69%	0.104712	0.370081	ENSRNOG00000065254	RT1-CE16	1	--	--	0	ENSRNOG00000065254	RT1-CE16	1	https://www.genome.jp/dbget-bin/www_bget?rno05330
Human Diseases	Endocrine and metabolic disease	rno04940	Type I diabetes mellitus	1/16 6.25%	69/9007 0.77%	0.115866	0.370081	ENSRNOG00000065254	RT1-CE16	1	--	--	0	ENSRNOG00000065254	RT1-CE16	1	https://www.genome.jp/dbget-bin/www_bget?rno04940
Human Diseases	Immune disease	rno05320	Autoimmune thyroid disease	1/16 6.25%	71/9007 0.79%	0.119028	0.370081	ENSRNOG00000065254	RT1-CE16	1	--	--	0	ENSRNOG00000065254	RT1-CE16	1	https://www.genome.jp/dbget-bin/www_bget?rno05320
Metabolism	Xenobiotics biodegradation and metabolism	rno00982	Drug metabolism - cytochrome P450	1/16 6.25%	73/9007 0.81%	0.12218	0.370081	ENSRNOG00000003620	Fmo3	1	ENSRNOG00000003620	Fmo3	1	--	--	0	https://www.genome.jp/dbget-bin/www_bget?rno00982
Organismal Systems	Digestive system	rno04971	Gastric acid secretion	1/16 6.25%	75/9007 0.83%	0.125322	0.370081	ENSRNOG00000029811	Kcne2	1	--	--	0	ENSRNOG00000029811	Kcne2	1	https://www.genome.jp/dbget-bin/www_bget?rno04971
Human Diseases	Infectious disease: viral	rno05165	Human papillomavirus infection	2/16 12.5%	353/9007 3.92%	0.128176	0.370081	ENSRNOG00000065254;ENSRNOG00000014288	RT1-CE16;Fn1	2	ENSRNOG00000014288	Fn1	1	ENSRNOG00000065254	RT1-CE16	1	https://www.genome.jp/dbget-bin/www_bget?rno05165
Human Diseases	Infectious disease: bacterial	rno05100	Bacterial invasion of epithelial cells	1/16 6.25%	77/9007 0.85%	0.128453	0.370081	ENSRNOG00000014288	Fn1	1	ENSRNOG00000014288	Fn1	1	--	--	0	https://www.genome.jp/dbget-bin/www_bget?rno05100
Human Diseases	Cardiovascular disease	rno05416	Viral myocarditis	1/16 6.25%	85/9007 0.94%	0.140872	0.370081	ENSRNOG00000065254	RT1-CE16	1	--	--	0	ENSRNOG00000065254	RT1-CE16	1	https://www.genome.jp/dbget-bin/www_bget?rno05416
Environmental Information Processing	Signaling molecules and interaction	rno04512	ECM-receptor interaction	1/16 6.25%	87/9007 0.97%	0.143951	0.370081	ENSRNOG00000014288	Fn1	1	ENSRNOG00000014288	Fn1	1	--	--	0	https://www.genome.jp/dbget-bin/www_bget?rno04512
Organismal Systems	Immune system	rno04612	Antigen processing and presentation	1/16 6.25%	87/9007 0.97%	0.143951	0.370081	ENSRNOG00000065254	RT1-CE16	1	--	--	0	ENSRNOG00000065254	RT1-CE16	1	https://www.genome.jp/dbget-bin/www_bget?rno04612
