# Supplementary material for: Neuroprotective effects of ethanol extraction from Rubia yunnanensis Diels on chronic cerebral hypoperfusion: modulation of the System Xc-/GSH/GPX4 axis to alleviate oxidative stress and ferroptosis
Source: Front Pharmacol. 2025 Feb 25;16:1552228. doi: 10.3389/fphar.2025.1552228 (PMC11893507; doi:10.3389/fphar.2025.1552228)
Supplement: Supplementary file 7 [file Table7.XLSX]

## Sheet: Sheet1
Ligand/Protein	TFRC	FPN	SLC7A11	SLC3A2	GSS	GPX4
Rhein	-9.2	-7.9	-8	-7.8	-8.5	-7.5
Emodin 8-glucoside	-9.5	-9	-9.3	-7.7	-9.5	-8.2
Corosolic acid	-9.3	-9.4	-8.1	-8.9	-8	-8.3
Alisol A	-7.4	-8.1	-7.4	-6.8	-7.1	-7.8
Dihydrotanshinone	-9.3	-9.6	-9.5	-7.8	-8.8	-8
